# Supplementary material for: Physical therapy and orthopaedic equipment-induced reduction in the biomechanical risk factors related to knee osteoarthritis: a systematic review and Bayesian network meta-analysis of randomised controlled trials
Source: PubMed Central journal article supplement — BMJ Open. 2022 Feb 9;12(2):e051608. doi: 10.1136/bmjopen-2021-051608 (PMC8830256; doi:10.1136/bmjopen-2021-051608), 2022-02-09
Supplement: bmjopen-2021-051608.draft_revisions.pdf [file bmjopen-2021-051608.draft_revisions.pdf]

# BMJ Open

BMJ Open is committed to open peer review. As part of this commitment we make the peer review history of every article we publish publicly available.

When an article is published we post the peer reviewers' comments and the authors' responses online. We also post the versions of the paper that were used during peer review. These are the versions that the peer review comments apply to.

The versions of the paper that follow are the versions that were submitted during the peer review process. They are not the versions of record or the final published versions. They should not be cited or distributed as the published version of this manuscript.

BMJ Open is an open access journal and the full, final, typeset and author-corrected version of record of the manuscript is available on our site with no access controls, subscription charges or pay-per-view fees (<http://bmjopen.bmj.com>).

If you have any questions on BMJ Open's open peer review process please email [info.bmjopen@bmj.com](mailto:info.bmjopen@bmj.com)

# BMJ Open

## Non-surgical Treatment-induced Reduction in the Biomechanical Risk Factors Related to Knee Osteoarthritis: A systematic review and Bayesian network meta-analysis of randomized controlled trials

|                               |                                                                                                                                                                                                                                                                                                                                                              |
|-------------------------------|--------------------------------------------------------------------------------------------------------------------------------------------------------------------------------------------------------------------------------------------------------------------------------------------------------------------------------------------------------------|
| Journal:                      | <i>BMJ Open</i>                                                                                                                                                                                                                                                                                                                                              |
| Manuscript ID                 | bmjopen-2021-051608                                                                                                                                                                                                                                                                                                                                          |
| Article Type:                 | Original research                                                                                                                                                                                                                                                                                                                                            |
| Date Submitted by the Author: | 24-Mar-2021                                                                                                                                                                                                                                                                                                                                                  |
| Complete List of Authors:     | Huang, XiMeng; Peking University Third Hospital<br>Yuan, Fu-Zhen; Peking University Third Hospital<br>Chen, You-Rong; Peking University Third Hospital<br>Huang, Ying; Peking Union Medical College Hospital<br>Yang, Ze-Xi; Peking University Third Hospital<br>Lin, Lin; Peking University Third Hospital<br>Yu, Jia-Kuo; Peking University Third Hospital |
| Keywords:                     | Biophysics < NATURAL SCIENCE DISCIPLINES, Adult orthopaedics < ORTHOPAEDIC & TRAUMA SURGERY, Knee < ORTHOPAEDIC & TRAUMA SURGERY, REHABILITATION MEDICINE                                                                                                                                                                                                    |
|                               |                                                                                                                                                                                                                                                                                                                                                              |

SCHOLARONE™  
Manuscripts

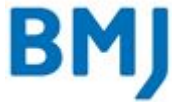

I, the Submitting Author has the right to grant and does grant on behalf of all authors of the Work (as defined in the below author licence), an exclusive licence and/or a non-exclusive licence for contributions from authors who are: i) UK Crown employees; ii) where BMJ has agreed a CC-BY licence shall apply, and/or iii) in accordance with the terms applicable for US Federal Government officers or employees acting as part of their official duties; on a worldwide, perpetual, irrevocable, royalty-free basis to BMJ Publishing Group Ltd ("BMJ") its licensees and where the relevant Journal is co-owned by BMJ to the co-owners of the Journal, to publish the Work in this journal and any other BMJ products and to exploit all rights, as set out in our [licence](#).

The Submitting Author accepts and understands that any supply made under these terms is made by BMJ to the Submitting Author unless you are acting as an employee on behalf of your employer or a postgraduate student of an affiliated institution which is paying any applicable article publishing charge ("APC") for Open Access articles. Where the Submitting Author wishes to make the Work available on an Open Access basis (and intends to pay the relevant APC), the terms of reuse of such Open Access shall be governed by a Creative Commons licence – details of these licences and which [Creative Commons](#) licence will apply to this Work are set out in our licence referred to above.

Other than as permitted in any relevant BMJ Author's Self Archiving Policies, I confirm this Work has not been accepted for publication elsewhere, is not being considered for publication elsewhere and does not duplicate material already published. I confirm all authors consent to publication of this Work and authorise the granting of this licence.

1 **Title: Non-surgical Treatment-induced Reduction in the Biomechanical Risk**  
 2 **Factors Related to Knee Osteoarthritis: A systematic review and Bayesian**  
 3 **network meta-analysis of randomized controlled trials**

4 **Authors:** Xi-Meng Huang<sup>1\*</sup>, MD; Fu-Zhen Yuan<sup>1\*</sup>, MD; You-Rong Chen<sup>1</sup>, MD; Ying  
 5 Huang<sup>2</sup>, MD; Ze-Xi Yang<sup>3</sup>, MD; Lin Lin<sup>1</sup>, MD; Jia-Kuo Yu<sup>1</sup>, MD&PhD

6 1. Institute of Sports Medicine, Peking University Third Hospital, Beijing Key  
 7 Laboratory of Sports Injuries, Beijing, 100191, China

8 2. Peking Union Medical College, Plastic Surgery Hospital, Chinese Academy of  
 9 Medical Sciences, Beijing, China.

10 3. Department of Orthopedic, Peking University Third Hospital, Beijing, 100191,  
 11 China

12 Xi-Meng Huang: [1510301201@pku.edu.cn](mailto:1510301201@pku.edu.cn)

13 Fu-Zhen Yuan: [yuanfuzhen2009@sina.com](mailto:yuanfuzhen2009@sina.com)

14 You-Rong Chen: [chenyourong1990@qq.com](mailto:chenyourong1990@qq.com)

15 Ying Huang: [1510122916@pku.edu.cn](mailto:1510122916@pku.edu.cn)

16 Ze-Xi Yang: [15101301202@pku.edu.cn](mailto:15101301202@pku.edu.cn)

17 Lin Lin: [simon.lin2003@163.com](mailto:simon.lin2003@163.com)

18 Jia-Kuo Yu: [yujiakuo@126.com](mailto:yujiakuo@126.com); Tel: 86-10-1861290798

19 First author: Xi-Meng Huang and Fu-Zhen Yuan

20 Corresponding author: Lin Lin and Jia-Kuo Yu

21 **Full correspondence details (for review) for contact purposes only:**

|             |                                                                                                              |
|-------------|--------------------------------------------------------------------------------------------------------------|
| Name        | Jia-Kuo Yu                                                                                                   |
| Institution | Institute of Sports Medicine, Peking University Third Hospital,<br>Beijing Key Laboratory of Sports Injuries |
| Country     | China                                                                                                        |
| Tel         | 86-10-1861290798                                                                                             |
| Mob         | Nil                                                                                                          |
| Fax         | Nil                                                                                                          |
| Email       | <a href="mailto:yujiakuo@126.com">yujiakuo@126.com</a>                                                       |

22 **Full correspondence (for publication) for contact purposes only:**

|      |            |
|------|------------|
| Name | Jia-Kuo Yu |
|------|------------|

Knee osteoarthritis (KOA); Knee adduction moment (KAM); Knee adduction angular impulse (KAAI)



|             |                                                                                                              |
|-------------|--------------------------------------------------------------------------------------------------------------|
| Institution | Institute of Sports Medicine, Peking University Third Hospital,<br>Beijing Key Laboratory of Sports Injuries |
| Country     | China                                                                                                        |
| Email       | <a href="mailto:yujiakuo@126.com">yujiakuo@126.com</a>                                                       |

23 **Abbreviated title:** Biomechanical Phenomena, Osteoarthritis, Knee, Physical and  
 24 Rehabilitation Medicine  
 25 **Key words:** Physical Therapy; Orthopedic Equipment; Knee Osteoarthritis;  
 26 KAM; KAAI; Bayesian Network Meta-analysis.  
 27 **Word Count:** 234words (Abstract)  
 28 3812words (Introduction, Method, Results, Discussion)  
 29 **References:** 59  
 30 **Tables:** 3  
 31 **Figures:** 4  
 32 **eAddenda:** 1  
 33 **Ethics approval:** Nil  
 34 **Competing interests:** Nil  
 35 **Source(s) of support:** This work was supported by the National Key R&D Program of  
 36 China (No.2017YFB1303000).  
 37 **Correspondence:** Jia-Kuo Yu, Institute of Sports Medicine, Peking University Third  
 38 Hospital, Beijing Key Laboratory of Sports Injuries, China,  
 39 [yujiakuo@126.com](mailto:yujiakuo@126.com)

63

64

65

66 **ABSTRACT**

67 *Objectives:* Do physical therapy and orthopedic equipment efficiency in reducing the  
68 biomechanical risk factors in people with knee osteoarthritis (KOA)? Is one therapy  
69 better than the others for improving these outcomes?

70 *Design:* Systematic review with network meta-analysis of randomised trials.

71 *Participants:* People with KOA.

72 *Intervention:* Physical therapy, orthopedic equipment and control (no/sham exercise or  
73 placebo).

74 *Outcome measures:* First and second peak knee adduction moment (KAM), and knee  
75 adduction angular impulse (KAAI)

76 *Results.* Eighteen randomized controlled trials, including 944 participants, met the  
77 inclusion criteria. Based on the collective probability of being the overall best therapy  
78 for reducing the first peak KAM, lateral wedge insoles (LWI) plus knee brace was  
79 closely followed by gait retraining, and knee brace only. Although no significant  
80 difference was observed among the eight interventions, variable-stiffness shoe and  
81 neuromuscular exercise exhibited a lower rate of reducing the first peak KAM. And  
82 based on the collective probability of being the overall best therapy for reducing KAAI,  
83 gait retraining was followed by LWI only, and lower limb exercise.

84 *Conclusion.* The ranking statistics like surface under the cumulative ranking curve  
85 values of our Bayesian network meta-analysis support the use of LWI plus knee brace  
86 for reducing the first peak KAM. We found gait retraining to be the most effective

Knee osteoarthritis (KOA); Knee adduction moment (KAM); Knee adduction angular impulse (KAAI)

1  
2  
3  
4 87 intervention as it could reduce the values for KAM and KAAI at the same time based  
5  
6 88 on cumulative ranking and relative effect estimates.  
7  
8

9 89 *Registration*. INPLASY202090054; Doi:10.37766/inplasy2020.9.0054.  
10

## 11 90 **Significance and Innovations**

12  
13  
14 91 ① This Bayesian network meta-analysis is the first review on effect of physical  
15  
16 92 therapy and orthopedic equipment on the biomechanical parameters (KAM &  
17  
18 93 KAAI) of the knee OA.  
19

20  
21  
22 94 ② This review observes a null statistical reduction in KAM and KAAI for most  
23  
24 95 physical therapies and orthopedic equipment, using these non-surgical treatments  
25  
26 96 clinically could improve symptoms and physical activity level without increasing  
27  
28 97 the biomechanical magnitude; thus, improving the quality of life of patients with  
29  
30 98 KOA.  
31  
32

33  
34  
35 99 ③ This review suggests that further studies should require more research articles in  
36  
37 100 these areas to further explore the impact of various non-surgical therapies on OA  
38  
39 101 patients.  
40  
41

42  
43 102  
44

45  
46 103  
47

## 48 104 **1. INTRODUCTION**

49  
50 105 Knee osteoarthritis (KOA), a chronic progressive disease, affects approximately 3.8%  
51  
52 106 of people worldwide, mainly middle-aged and older adults. It is more prevalent in  
53  
54 107 women than in men<sup>1,2</sup>. The main clinical manifestation of KOA is knee pain and is  
55  
56 108 often accompanied by radiographic degeneration of the intra-articular cartilage  
57  
58  
59  
60

1  
2  
3  
4 109 associated with hypertrophic bone changes <sup>3</sup>. With the development of KOA,  
5  
6 110 patients may also report stiffness, locking, instability and function loss. Though it  
7  
8  
9 111 is not fatal, the persistent pain and movement difficulties associated with this  
10  
11  
12 112 condition negatively impact the physical and mental health of the patients; thus,  
13  
14 113 reducing their quality of life <sup>4</sup>.

15  
16  
17 114 These pathological changes of knee joint structure are the result of the break of  
18  
19  
20 115 biomechanical balance and the progression of the disease is now believed to be  
21  
22 116 associated with malalignment of the lower limb <sup>5</sup>. Of the three compartments of a  
23  
24  
25 117 knee joint, KOA mostly occurs in the medial tibiofemoral compartment as it bears  
26  
27 118 60-91% of the total body load, higher than the lateral one <sup>6</sup>. The external knee  
28  
29  
30 119 adduction moment (KAM) results from the unequal distribution of the transmitted  
31  
32  
33 120 load on both sides in the normal gait of humans. It is defined as the cross product  
34  
35 121 of the ground reaction force and the distance between the knee joint and the force  
36  
37  
38 122 line <sup>7</sup>. Individuals with obesity or other risk factors tend to have frontal plane knee  
39  
40  
41 123 malalignment, which alters the normal force line, forcing the medial knee joint to  
42  
43 124 bear more load and increased KAM <sup>8,9</sup>. The accumulation effect of the moment is  
44  
45  
46 125 determined by calculating the integral of the moment to time, which is also termed  
47  
48  
49 126 as Knee adduction angular impulse (KAAI). It reflects the change in knee joint  
50  
51  
52 127 rotation state during a stance period of gait <sup>10</sup>. Previous studies have revealed a  
53  
54  
55 128 strong correlation between the peak levels of KAM and KAAI and the severity and  
56  
57  
58 129 progression of the disease, which was reflected and calculated by the loss of medial  
59  
60 130 tibial cartilage<sup>11,12</sup>. Both these biomechanical parameters (KAM and KAAI) are

1  
2  
3  
4 131 commonly used to evaluate the medial knee load and predict the long-term  
5  
6 132 structural deterioration.  
7  
8  
9 133 Recent advancements in healthcare have resulted in the development of several  
10  
11 134 protocols for the intervention and treatment of KOA. KOA patients are primarily  
12  
13  
14 135 recommended non-surgical treatments with the intention of correcting the deviated  
15  
16  
17 136 force line and delaying the progressive pathological damage inside the knee joint <sup>7</sup>.  
18  
19 137 Several non-surgical treatments, such as exercise therapies and noninvasive orthotic  
20  
21  
22 138 devices, have been introduced in orthopedic clinics. Both these modalities focus on  
23  
24  
25 139 relieving pain and improving patients' symptoms by changing the biomechanical  
26  
27  
28 140 state of the knee joint. The exercise therapies mainly include muscular  
29  
30  
31 141 strengthening and gait modification, while orthotic devices include customized  
32  
33  
34 142 shoes/footwear, wedged insoles, and knee braces.  
35  
36 143 Previous studies have shown the positive impact of exercise therapy in KOA. The  
37  
38 144 strengthening of related lower limb muscles, which play a vital role in disease  
39  
40  
41 145 progression, are known to reduce pain and improve motor functions and are often  
42  
43 146 recommended to KOA patients <sup>13</sup>. Additionally, gait training presents a viable way  
44  
45  
46 147 to correct the patients' underlying gait pattern, which could also reduce their knee  
47  
48  
49 148 load and pain <sup>14,15</sup>. Further, several kinds of orthotic devices have been introduced  
50  
51  
52 149 for the treatment of KOA. The clinical use of lateral wedge insoles (LWI) has  
53  
54 150 gained immense popularity since its origin in 1987 <sup>16,17</sup>. The insoles work by  
55  
56  
57 151 shifting the lateral part of the foot more than the medial part by a slope. Thus, a  
58  
59 152 slope is created to increase the valgus tendency of lower extremities. The center of  
60

1  
2  
3  
4 153 the ground reaction force is shifted laterally, which induces a reduction in force  
5  
6 154 lever arm length and magnitude. Also, the valgus knee brace is a commonly used  
7  
8  
9 155 device. It applies an external valgus force around the knee joint to reduce the medial  
10  
11  
12 156 knee load.

13  
14 157 In the past, several systematic reviews and meta-analysis have been published  
15  
16  
17 158 featuring the medical effects of a single KOA treatment. However, only a few of  
18  
19  
20 159 them have focused on multifaceted interventions. Also, only a few reviews have  
21  
22  
23 160 reported the effects of these changes on the biomechanical parameters. The  
24  
25  
26 161 mechanical changes in the body were not sufficiently investigated. Current reviews  
27  
28  
29 162 on KAM and KAAI have also not compared these changes. Thus, we performed a  
30  
31  
32 163 network meta-analysis (NMA) to appraise the benefits of physical treatments in  
33  
34  
35 164 reducing the biomechanical risk factors in KOA patients to overcome these  
36  
37  
38 165 shortcomings, and to help achieve the goal of reducing pain and improving function.  
39  
40  
41 166 Therefore the research questions for this systematic review were:

- 42  
43 167 1. Do physical therapy and orthopedic equipment efficiency in reducing the  
44  
45 168 biomechanical risk factors in people with knee osteoarthritis (KOA)?  
46  
47 169 2. Is one therapy better than the others for improving these outcomes?

## 48 170 2. METHODS

49  
50  
51 171 The protocol was registered on the INPLASY (registration number:  
52  
53 172 INPLASY202090054; Doi:10.37766/inplasy2020.9.0054). All pooled analyses  
54  
55  
56 173 were derived from previous studies and, therefore, did not require ethical approval  
57  
58  
59 174 and informed consent.  
60

## 175 **2.1 Identification and selection of studies.**

176 We searched the following databases for randomized controlled trials that were  
177 published before January 2021, which explored the benefits of using non-surgical  
178 treatments in reducing the biomechanical risk factors which included the KAM and  
179 the KAAI in patients with KOA: PubMed, Web of Science, Cochrane Library,  
180 Embase, and MEDLINE. The search was not restricted by language, date,  
181 publication type, or publication status (see Appendix 1). Additionally, we  
182 performed manual analyses of the published references regarding the use of non-  
183 surgical treatments for treating KOA.

184 The eligibility of searched publications was independently reviewed by HXM, YZX  
185 following the Cochrane manual<sup>18</sup>. Any additional inconsistencies were resolved  
186 either by deliberation or by a senior expert (HY). First, the study titles and abstracts,  
187 published in the English language, were screened. Next, complete articles were  
188 reviewed against the following criteria in Box 1.

189 Eligible comparison subjects, including standard/conventional care or waiting list  
190 control (analgesic advice and education), were defined as “standard care.” Standard  
191 care treatment also included placebo intervention, no intervention, and sham-  
192 exercise. In this network meta-analysis, lower limb exercise was defined as the  
193 simultaneous exercise of multiple groups of muscles (including hip abductors,  
194 quadriceps, and hamstrings). Since our research needed to maintain clinical and  
195 statistical homogeneity and also focus on the left-over biomechanical effects after  
196 intervention, we selected articles whose measurements were strictly obtained under

1  
2  
3  
4 197 the condition of bare foot.

5  
6 198 The exclusion criteria included: (1) studies that were not consistent with the  
7  
8  
9 199 eligibility criteria; (2) studies that were in the form of the non-trial papers, including  
10  
11  
12 200 abstracts, comments, letters, or reviews; (3) studies including participants who had  
13  
14 201 received surgical treatment in the past; (4) studies that did not report suitable data.

## 17 202 **2.2 Data Collection and Quality assessment.**

18  
19 203 KAM and KAAI were the preferred biomechanical measures used in this meta-  
20  
21  
22 204 analysis. The biomechanical indicators of the included studies were measured on  
23  
24  
25 205 flat ground or treadmills. The number of trials that focused on the second peak of  
26  
27 206 KAM was insufficient to conduct an independent network meta-analysis.

28  
29  
30 207 Two authors (HXM, YZX) extracted data independently and then cross-checked the  
31  
32  
33 208 data. A predefined information sheet was used to extract the data, which included  
34  
35 209 the details of the first author (name), country, year of publication, population  
36  
37  
38 210 characteristics, intervention, and the time point. The authors of the original study  
39  
40 211 were contacted if more data was required.

## 43 212 **2.3 Assessment of characteristics of studies.**

### 45 213 *Risk of bias*

46  
47  
48 214 In this network meta-analysis, we used the Cochrane risk bias tool to assess the risk  
49  
50  
51 215 of bias in randomized controlled trials using the following evaluation indicators:  
52  
53 216 sequence generation, allocation concealment, blinding, incomplete outcome data  
54  
55  
56 217 addressed, selective outcome reporting, and other biases<sup>18</sup>. The judgment of the bias  
57  
58 218 risk of this item was presented as "low," "high," and "unclear." Two authors



1  
2  
3  
4 219 independently evaluated the risk of bias of the included studies. The authors  
5  
6 220 discussed or referred to the opinion of a senior author to resolve any disagreements.  
7  
8  
9 221 Additionally, we evaluated the certainty of evidence which contributed to network  
10  
11 222 estimates of the main outcomes with the Grading of Recommendations Assessment,  
12  
13  
14 223 Development and Evaluation (GRADE) framework.

#### 17 224 *Intervention*

18  
19 225 In order to describe the experimental intervention, we extracted the following  
20  
21  
22 226 information: the method of training with relevant further details, the details and  
23  
24  
25 227 characteristics of orthopedic equipment, the frequency and total duration of training  
26  
27 228 or wearing.

#### 30 229 *Outcome measures*

31  
32 230 Biomechanical risk factors were extracted from barefoot walking test, including the  
33  
34  
35 231 first peak KAM, the second peak KAM and KAAI. KAM was normalized as %body  
36  
37  
38 232 weight times height, with conversion to Nm/kg where necessary. KAAI was the  
39  
40 233 accumulation effect of the moment which was determined by calculating the  
41  
42  
43 234 integral of the moment to time.

### 45 235 **2.4 Statistical Analysis.**

46  
47  
48 236 We conducted a network meta-analysis to compare multiple interventions,  
49  
50  
51 237 including both direct evidences (where treatments were compared directly) and  
52  
53 238 indirect evidences (where treatments were compared with a common control),  
54  
55  
56 239 maintaining randomization in each independent study. Interventions and  
57  
58 240 demographic characteristics were either consistent or comparable across the  
59  
60

1  
2  
3  
4 241 included studies<sup>19-24</sup>.  
5  
6 242 Due to different units, the continuous data used the standard mean difference (SMD)  
7  
8  
9 243 as the statistical indicator of the effect, and the Frequentist 95% confidence interval  
10  
11 244 (CI) of each effect was calculated. Additionally, the  $I^2$  statistic was used to analyze  
12  
13  
14 245 the overall heterogeneity of the two-arm study and the network. The fixed-effect  
15  
16 246 model was used in case no statistical heterogeneity was found between the studies  
17  
18 247 ( $p > 0.05$ ,  $I^2 < 50\%$ ); else, the random effect model was used, and the source of  
19  
20  
21 248 heterogeneity was analyzed. The Node-Split Model was used for testing  
22  
23 249 consistency. If  $p > 0.05$ , then the consistency model was used for analysis; else, the  
24  
25 250 inconsistency model was used for analysis. Normal likelihood distributions were  
26  
27 251 assumed, non-informative prior distributions were set, and three Markov chains  
28  
29 252 were run simultaneously. The number of update iterations was 50,000, a total of  
30  
31 253 5000 simulations were used for annealing, and the subsequent 45,000 iterations  
32  
33 254 were examined. The mean rank and surface under the cumulative ranking curve  
34  
35 255 (SUCRA) were used for reporting the probability values. A SUCRA value of 100%  
36  
37 256 was considered best, whereas 0% indicated the worst treatment.  
38  
39 257 The data from eligible studies were combined using the Review Manager (RevMan)  
40  
41 258 software v5.3. The contribution of the effect sizes was dependent on the sample size  
42  
43 259 and their estimation accuracy. We performed the Bayesian analyses using  
44  
45 260 WinBUGs v1.4.3. Stata (StataCorp. 2015. Stata Statistical Software: Release 15.  
46  
47 261 College Station, TX: StataCorp LP) was used to conduct the frequentist NMA.

### 262 3. RESULTS

Knee osteoarthritis (KOA); Knee adduction moment (KAM); Knee adduction angular impulse (KAAI)

### 263 3.1 Flow of studies through the review

264 Overall, the database search strategy found 4919 citation. After screening articles  
265 by title and abstract, and deleting duplicate articles, we identified 526 studies that  
266 might meet the criteria for inclusion, and then we searched and evaluated their full  
267 text. Figure 1 presents the study selection flow chart. Eighteen randomized  
268 controlled trials, including 944 participants, met the inclusion criteria <sup>25-42</sup>. Since  
269 the present network meta-analysis only considered trials comparing the nine  
270 treatments with usual care or each other, only fourteen trials (792 participants) were  
271 included.

### 272 3.2 Characteristics of included studies

273 All studies included the radiologically confirmed tibiofemoral OA. The duration of  
274 treatment ranged from 2 weeks to 12 months, although most intervention times were  
275 administered over an 8-13-week period. The number of exercises varied from 2-5  
276 times per week, depending on the preparation <sup>31,33,36,37</sup>. Both studies of gait training  
277 used the faded feedback paradigm, which meant gradual removal of the real-time  
278 biofeedback <sup>27,32</sup>. Of the fourteen studies that were included in NMA, nine were  
279 classified as Kellgren/Lawrence grade 2 and above. All studies reported either the  
280 BMI or the values for height and weight, and in some studies recruiting a general  
281 population, the mean BMI was classified as overweight or obese. One study  
282 included in NMA had a randomized crossover design <sup>25</sup>. After referring to the  
283 manual and consulting a professional statistician, the mean and standard deviation  
284 of the experimental and the control groups were analyzed in this network meta-

1  
2  
3  
4 285 analysis<sup>18</sup>. Tables 1 and 2 summarize the characteristics of the included studies and  
5  
6 286 participants.

### 7 8 9 287 **3.3 KAM.**

10  
11 288 A study reported that the VER-brace offers additional advantages on first peak  
12  
13 289 KAM compared to V3P-brace and ACL-brace<sup>42</sup>. No first peak KAM reduction was  
14  
15 290 observed between proprioceptive neuromuscular facilitation group and control  
16  
17 291 group<sup>40</sup>, and the result of the study of minimal footwear was the same<sup>39</sup>. Table 3  
18  
19 292 shows the NMA results of a comparative analysis of the reduction of the first peak  
20  
21 293 KAM. We found insignificant differences in most of the treatment modalities;  
22  
23 294 however, several interventions (Standard care (A) -1.06, 95% CI -1.63 to -0.49;  
24  
25 295 LWI (B) -1.26, 95% CI -1.90 to -0.61; Knee Brace (C) -1.47, 95% CI -2.29 to -0.66;  
26  
27 296 LWI + Knee Brace (D) -1.98, 95% CI -3.15 to -0.81; Gait retraining (E) -1.59, 95%  
28  
29 297 CI -2.30 to -0.87; Quadriceps strengthening (F) -0.93, 95% CI -1.60 to -0.27; Hip  
30  
31 298 strengthening (H) -0.76, 95% CI -1.49 to -0.03; Lower limb exercise (I) -0.97, 95%  
32  
33 299 CI -1.73 to -0.21; and Neuromuscular exercises (J) -0.69, 95% CI -1.36 to -0.02)  
34  
35 300 showed a statistically significant reduction in the first peak KAM over variable-  
36  
37 301 stiffness shoes (G). The overall difference in first peak KAM (v standard care(A))  
38  
39 302 was -0.53 (95% CI -0.95 to -0.10) for gait retraining (E), 1.06 (95% CI 0.49 to 1.63)  
40  
41 303 for variable-stiffness shoes (G), and 0.37 (95% CI 0.02 to 0.71) for neuromuscular  
42  
43 304 exercises (J). Based on the collective probability of being the overall best therapy  
44  
45 305 for reducing the first peak KAM, LWI plus knee brace (D) (93.4%) was closely  
46  
47 306 followed by gait retraining (E) (85.7%), and knee brace only(C) (79.3%) (Figure  
48  
49  
50  
51  
52  
53  
54  
55  
56  
57  
58  
59  
60

Knee osteoarthritis (KOA); Knee adduction moment (KAM); Knee adduction angular impulse (KAAI)

1  
2  
3  
4 307 2). On the other hand, after the electroacupuncture treatment, compared with the  
5  
6 308 control group, the second peak KAM significantly increased immediately when the  
7  
8  
9 309 patient ascended stairs<sup>41</sup>.

### 11 310 **3.4 KAAI.**

14 311 KAAI was reported in ten studies<sup>25,27,31,34-39,42</sup>. After wearing the three kinds of  
15  
16  
17 312 brace separately, the KAAI measured under barefoot conditions did not decrease  
18  
19 313 significantly, and there was no significant difference between the groups<sup>42</sup>. Table 3  
20  
21  
22 314 shows the NMA results of the reduction of KAAI. Most treatments were not  
23  
24  
25 315 statistically different from each other, consistent with the results of the first peak  
26  
27 316 KAM. Only gait retraining (E) has a statistical reduction compared with the  
28  
29  
30 317 standard care treatment (A) (-0.48, 95% CI -0.96 to -0.01). Based on the collective  
31  
32  
33 318 probability of being the overall best therapy for reducing KAAI, gait retraining (E)  
34  
35 319 (90.7%) was followed by LWI only (B) (74.1%), and lower limb exercise (I) (53.8%)  
36  
37  
38 320 (Figure 3).

### 40 321 **3.5 Risk of bias.**

43 322 Figure 4 presents a summary of the quality of methods used in this analysis. Nine  
44  
45 323 studies presented a clear description of generating a randomization sequence<sup>29-</sup>  
46  
47  
48 324 <sup>31,33,36-39,41</sup>. The study by Hinman et al. was the only double-blinded study, while  
49  
50  
51 325 other studies were either single-blinded or did not clearly describe their blind design.  
52  
53 326 All trials provided follow-up data on their outcomes. Six studies did not report the  
54  
55  
56 327 number or the reason for lost visits due to the length of follow-up <sup>25,29,30,32,33,36</sup>.  
57  
58  
59 328 Consequently, all studies were included in the synthesis evaluation and qualified  
60

1  
2  
3  
4 329 for literature assessment. And we prepared comparison-adjusted funnel plots that  
5  
6 330 represented different comparisons with different colors. The funnel plots were  
7  
8  
9 331 symmetrically distributed based on a visual inspection, which suggested the  
10  
11  
12 332 absence of small-sample effects for our outcomes (see Appendix 5).

#### 13 14 333 4. DISCUSSION

15  
16  
17 334 Our results did not show significant differences regarding the superiority of  
18  
19 335 intervention among different types of non-surgical therapies. This lack of difference  
20  
21  
22 336 was attributed to the fact that the number of studies for several pairwise  
23  
24  
25 337 comparisons was small. However, some of these therapies were still worth  
26  
27 338 recommending. Due to the small number of studies studying the outcome of the  
28  
29  
30 339 KAAI , We found gait retraining to be the relatively more convincing intervention  
31  
32  
33 340 as it could reduce the values for KAM and KAAI at the same time based on  
34  
35 341 cumulative ranking and relative effect estimates. Due to the lack of significant  
36  
37  
38 342 differences among the exercise interventions, we were not able to conclusively  
39  
40 343 accept the cumulative ranking obtained by the network meta-analysis. For example,  
41  
42  
43 344 gait retraining, which occupied the first rank position (90.7%) for reducing the  
44  
45 345 KAAI, was only superior to the neuromuscular exercise interventions.

46  
47  
48 346 This study had several strengths and limitations. Eligible RCT studies were  
49  
50  
51 347 identified by conducting a comprehensive search on several databases and resources.  
52  
53 348 Additionally, two independent reviewers scanned through the search output,  
54  
55  
56 349 extracted data, classified interventions, and evaluated the methodological quality of  
57  
58  
59 350 each trial to minimize potential bias.

1  
2  
3  
4 351 This network meta-analysis is the first report on the effects of physical therapy and  
5  
6 352 orthopedic equipment on the parameters of knee load (KAM, KAAI). Since non-  
7  
8  
9 353 surgical therapy is a complex intervention with a small number of trials comparing  
10  
11 354 the different types of interventions, network meta-analysis appeared to be the most  
12  
13  
14 355 relevant form of analysis. The results of this meta-analysis would be more useful  
15  
16  
17 356 for the decision-makers, service specialists, and caregivers to choose among the  
18  
19 357 various available options, compared with multiple separate pairwise meta-analyses  
20  
21  
22 358 <sup>43</sup>. Additionally, this network meta-analysis conducted each comparison separately  
23  
24  
25 359 with both direct and indirect statistical effects, deriving statistical power from all  
26  
27 360 included data <sup>43</sup>. Also, the Bayesian method provided the probability estimates  
28  
29 361 regarding the superior efficacy of specific exercise interventions, even though the  
30  
31 362 standard methods described the absence of a significant difference between them.  
32  
33  
34 363 In addition, we calculated alternative rankings (second, third best, etc), because in  
35  
36 364 some cases the best exercise intervention might be unavailable, more costly, or  
37  
38 365 contraindicated in some patients.  
39  
40  
41 366 As with most meta-analyses on non-surgical therapies for osteoarthritis, one of the  
42  
43 367 limitations of this network meta-analysis includes the inclusion of trials that had  
44  
45  
46 368 variable periods of follow-up, which could have introduced heterogeneity into the  
47  
48  
49 369 study analysis. Although there was no study that exclusively reported the immediate  
50  
51 370 effect, the span in follow-up periods cannot be ignored. There exist several methods  
52  
53  
54 371 of analyzing and comparing trials with multiple durations of follow-up, as  
55  
56  
57 372 recommended by the Cochrane handbook, such as performing individual patient  
58  
59  
60

1  
2  
3  
4 373 data meta-analysis and evaluating at a particular time point. However, methods are  
5  
6 374 being developed that would include all time points in a network meta-analysis<sup>18</sup>.  
7  
8  
9 375 We removed a study which had a short follow-up time and might cause  
10  
11 376 heterogeneity<sup>25</sup>, and performed another network meta-analysis. There is no  
12  
13  
14 377 difference between the results of the reanalysis and the current ranking (see  
15  
16  
17 378 Appendix 7). We were not able to evaluate the influence of population  
18  
19 379 characteristics (such as mean age, the severity of osteoarthritis), as the number of  
20  
21  
22 380 the included studies was not large enough<sup>45-47</sup>. Additionally, other parameters, such  
23  
24  
25 381 as the external knee flexion moment to joint load, should have been studied.  
26  
27 382 However, due to the small number of related articles, we were temporarily unable  
28  
29  
30 383 to include them. By the way, according to the GRADE framework (see Appendix  
31  
32  
33 384 6), the quality of the most comparisons was assessed as low or very low, which  
34  
35 385 might affect the reliability of the evidence.  
36  
37  
38 386 A previous review showed that LWIs were able to reduce the KAM at baseline<sup>48</sup>;  
39  
40 387 however, the effect was no longer observed after a period of time. One study  
41  
42  
43 388 showed that a 1-month wear-in period was the longest time period studied where  
44  
45 389 no reduction in biochemical risk factors was observed despite continued wear<sup>49</sup>.  
46  
47  
48 390 Besides, several systematic reviews had concluded that exercise and gait retraining  
49  
50  
51 391 could reduce pain and improve motor functioning in people with KOA<sup>50-52</sup>, it was  
52  
53 392 possible that any clinical changes in previous studies may due to the increased  
54  
55  
56 393 physical activity levels, and not have been the results of altered loading environment  
57  
58  
59 394 within the knee joint. Furthermore, another study revealed that an increase in the  
60



1  
2  
3  
4 395 amount of reduction in peak KAM in LWIs plus knee brace group was observed  
5  
6 396 after 4 weeks<sup>53</sup>.

7  
8  
9 397 On the other hand, physical therapies and orthopedic equipment also need to be  
10  
11 398 considered for relieving patients' pain, which has been the focus of several reviews  
12  
13  
14 399 in the past. As an important factor in kinetics and kinematics of gait, the joint pain  
15  
16  
17 400 can affect the kinetics and kinematics of walking<sup>54</sup>. A meta-analysis reported that  
18  
19 401 exercise therapy had a positive impact on knee pain and kinematic function, though  
20  
21  
22 402 this relief of pain subsided with time. After initiation, the efficiency of physical  
23  
24  
25 403 exercise over placebo reached maxima at 2 months<sup>55</sup>.

26  
27 404 Cumulative loading is another significant parameter regarding knee load exposure  
28  
29  
30 405 in OA<sup>56</sup>. KAAI has been proposed as another indicator to evaluate the duration and  
31  
32  
33 406 intensity of KOA load, despite the association between KAM and disease  
34  
35  
36 407 progression. According to a 12-month study, the loss of medial tibiofemoral  
37  
38  
39 408 cartilage was not directly related to KAM but was related to KAAI<sup>57</sup>. Although the  
40  
41  
42 409 effect of physical therapy and orthopedic equipment on KAM may gradually  
43  
44  
45 410 disappears, it may have a huge cumulative effect on the knee during the early stages  
46  
47  
48 411 of treatment. This should be considered while interpreting the results of this network  
49  
50  
51 412 meta-analysis.

52  
53  
54 413 The results presented in this study are both scientifically and clinically instructive.  
55  
56  
57 414 Despite observing a null statistical reduction in KAM and KAAI for most non-  
58  
59  
60 415 surgical therapies, using these treatments clinically could improve symptoms and  
416 physical activity level without increasing the biomechanical magnitude; thus,

1  
2  
3  
4 417 improving the quality of life of patients with KOA. Since the studies included in  
5  
6 418 this network meta-analysis mainly involves patients with medial knee osteoarthritis,  
7  
8  
9 419 the results would be more useful for these patients.

10  
11 420 On the other hand, previous study reported that the increase in KAAI can explain  
12  
13 421 the significant variation in the uCTX-II levels and the uCTX-II:sCPII ratio in  
14  
15 422 patients with medial tibiofemoral KOA when additional variables are controlled<sup>58</sup>.

16  
17 423 This showed that intervention in the biomechanical structure of the knee joint in  
18  
19 424 patients with KOA is a potential beneficial role on cartilage structure. Mazzoli et  
20  
21 425 al. pointed out that adopting a modified gait that reduces the KAM can decrease the  
22  
23 426 pain in the medial compartment in KOA more than walking alone<sup>59</sup>, which suggests  
24  
25 427 that the KAM and KAAI of patients under non-surgical treatment can be restricted  
26  
27 428 to help reduce pain and improve joint function. More research is needed to further  
28  
29 429 illustrate the impact of changes in knee biomechanics on the prognosis of patients.

30  
31 430 Additionally, some other therapies have been reported, such as Taiji, ultrasound,  
32  
33 431 acoustic exercise, etc. However, due to the lack of RCT study design or the report  
34  
35 432 of their biomechanical outcomes, we were not able to include these therapies in our  
36  
37 433 review. Therefore, further studies would require more research articles in these  
38  
39 434 areas to further explore the impact of various non-surgical therapies on OA patients.

40  
41 435 After accumulating evidence regarding the role of non-surgical therapy in KOA, we  
42  
43 436 could conduct a similar network meta-analysis to understand the relative  
44  
45 437 effectiveness of various types of these interventions in relevant patients.

## 438 5. Conclusion

1  
2  
3  
4 439 This network meta-analysis provides valuable insight regarding the alterations in  
5  
6 440 KAM and KAAI of OA patients after non-surgical treatment. The results indicate  
7  
8  
9 441 that lateral wedge insoles plus knee brace was the best therapy for reducing the first  
10  
11 442 peak KAM and gait retraining had the best effect on reducing the KAAI. On the  
12  
13  
14 443 contrary, variable-stiffness shoe and neuromuscular exercise exhibited an increase  
15  
16  
17 444 in the first peak KAM compared to the standard care group. Taken together, these  
18  
19 445 findings suggest that clinicians should choose carefully when treating OA.

## 22 446 **6. Authors' Contributions**

23  
24 447 HXM and YFZ conceived of the study, and participated in its design and  
25  
26  
27 448 coordination and helped to draft the manuscript; YZX, HY and CRY contributed  
28  
29  
30 449 significantly to analysis and manuscript preparation; YJK and LL helped perform  
31  
32 450 the analysis with constructive discussions and revised it critically for important  
33  
34  
35 451 intellectual content.

## 37 452 **7. Competing interests**

38  
39  
40 453 There were no conflicts of interest.

## 42 454 **8. Funding**

43  
44  
45 455 This work was supported by the National Key R&D Program of China  
46  
47  
48 456 (No.2017YFB1303000).

## 49 457 **9. Ethics approval**

50  
51  
52 458 Not required.

## 53 459 **10. Patient and public involvement**

54  
55  
56 460 Patients and/or the public were not involved in the design, or conduct, or reporting,

461 or dissemination plans of this research.

## 462 References:

- 463 1. Srikanth VK, Fryer JL, Zhai G et al. A meta-analysis of sex differences prevalence, incidence and  
 464 severity of osteoarthritis. *Osteoarthr Cartilage*. 2005;13(9):769-81
- 465 2. Cross M, Smith E, Hoy D et al. The global burden of hip and knee osteoarthritis: estimates from the  
 466 global burden of disease 2010 study. *Ann Rheum Dis*. 2014;73(7):1323-30
- 467 3. Turpin KM, De Vincenzo A, Apps AM et al. Biomechanical and clinical outcomes with shock-  
 468 absorbing insoles in patients with knee osteoarthritis: immediate effects and changes after 1 month  
 469 of wear. *Arch Phys Med Rehab*. 2012;93(3):503-8
- 470 4. Neogi T. The epidemiology and impact of pain in osteoarthritis. *Osteoarthr Cartilage*.  
 471 2013;21(9):1145-53
- 472 5. Tanamas S, Hanna FS, Cicuttini FM et al. Does knee malalignment increase the risk of development  
 473 and progression of knee osteoarthritis? A systematic review. *Arthritis and rheumatism*.  
 474 2009;61(4):459-67
- 475 6. Xing F, Lu B, Kuang M et al. A systematic review and meta-analysis into the effect of lateral wedge  
 476 arch support insoles for reducing knee joint load in patients with medial knee osteoarthritis. *Medicine*.  
 477 2017;96(24):e7168
- 478 7. Reeves ND, Bowling FL. Conservative biomechanical strategies for knee osteoarthritis. *Nature*  
 479 *reviews. Rheumatology*. 2011;7(2):113-22
- 480 8. Block JA, Shakoor N. Lower limb osteoarthritis: biomechanical alterations and implications for  
 481 therapy. *Curr Opin Rheumatol*. 2010;22(5):544-50
- 482 9. Englund M. The role of biomechanics in the initiation and progression of OA of the knee. *Best*  
 483 *practice & research. Clinical rheumatology*. 2010;24(1):39-46
- 484 10. Arnold JB, Wong DX, Jones RK, Hill CL, Thewlis D. Lateral Wedge Insoles for Reducing  
 485 Biomechanical Risk Factors for Medial Knee Osteoarthritis Progression: A Systematic Review and  
 486 Meta-Analysis. *Arthrit Care Res*. 2016;68(7):936-51
- 487 11. Brisson NM, Wiebenga EG, Stratford PW et al. Baseline knee adduction moment interacts with body  
 488 mass index to predict loss of medial tibial cartilage volume over 2.5 years in knee Osteoarthritis.  
 489 *Journal of orthopaedic research : official publication of the Orthopaedic Research Society*.  
 490 2017;35(11):2476-2483
- 491 12. Bennell KL, Bowles K, Wang Y et al. Higher dynamic medial knee load predicts greater cartilage  
 492 loss over 12 months in medial knee osteoarthritis. *Ann Rheum Dis*. 2011;70(10):1770-4
- 493 13. Goh S, Persson MSM, Stocks J et al. Efficacy and potential determinants of exercise therapy in knee  
 494 and hip osteoarthritis: A systematic review and meta-analysis. *Annals of physical and rehabilitation*  
 495 *medicine*. 2019;62(5):356-365
- 496 14. Cheung RTH, Ho KKW, Au IPH et al. Immediate and short-term effects of gait retraining on the  
 497 knee joint moments and symptoms in patients with early tibiofemoral joint osteoarthritis: a  
 498 randomized controlled trial. *Osteoarthr Cartilage*. 2018;26(11):1479-1486
- 499 15. Shull PB, Jirattigalachote W, Hunt MA, Cutkosky MR, Delp SL. Quantified self and human  
 500 movement: a review on the clinical impact of wearable sensing and feedback for gait analysis and  
 501 intervention. *Gait Posture*. 2014;40(1):11-9
- 502 16. Sasaki T, Yasuda K. Clinical evaluation of the treatment of osteoarthritic knees using a newly

Knee osteoarthritis (KOA); Knee adduction moment (KAM); Knee adduction angular impulse (KAAI)

- 1  
2  
3 503 designed wedged insole. *Clin Orthop Relat R.* 1987;(221):181-7
- 4 504 17. Yasuda K, Sasaki T. The mechanics of treatment of the osteoarthritic knee with a wedged insole.  
5 505 *Clin Orthop Relat R.* 1987;(215):162-72
- 6 506 18. Furlan AD, Malmivaara A, Chou R et al. 2015 Updated Method Guideline for Systematic Reviews  
7 507 in the Cochrane Back and Neck Group. *Spine.* 2015;40(21):1660-73
- 8 508 19. Dias S, Welton NJ, Caldwell DM, Ades AE. Checking consistency in mixed treatment comparison  
9 509 meta-analysis. *Stat Med.* 2010;29(7-8):932-44
- 10 510 20. Cooper NJ, Sutton AJ, Morris D, Ades AE, Welton NJ. Addressing between-study heterogeneity and  
11 511 inconsistency in mixed treatment comparisons: Application to stroke prevention treatments in  
12 512 individuals with non-rheumatic atrial fibrillation. *Stat Med.* 2009;28(14):1861-81
- 13 513 21. Welton NJ, Caldwell DM, Adamopoulos E, Vedhara K. Mixed treatment comparison meta-analysis  
14 514 of complex interventions: psychological interventions in coronary heart disease. *Am J Epidemiol.*  
15 515 2009;169(9):1158-65
- 16 516 22. Salanti G, Higgins JPT, Ades AE, Ioannidis JPA. Evaluation of networks of randomized trials. *Stat*  
17 517 *Methods Med Res.* 2008;17(3):279-301
- 18 518 23. Caldwell DM, Ades AE, Higgins JPT. Simultaneous comparison of multiple treatments: combining  
19 519 direct and indirect evidence. *BMJ (Clinical research ed.).* 2005;331(7521):897-900
- 20 520 24. Lu G, Ades AE. Combination of direct and indirect evidence in mixed treatment comparisons. *Stat*  
21 521 *Med.* 2004;23(20):3105-24
- 22 522 25. Jones RK, Nester CJ, Richards JD et al. A comparison of the biomechanical effects of valgus knee  
23 523 braces and lateral wedged insoles in patients with knee osteoarthritis. *Gait Posture.* 2013;37(3):368-  
24 524 372
- 25 525 26. Khosravi M, Arazpour M, Sharafat Vaziri A. An evaluation of the use of a lateral wedged insole and  
26 526 a valgus knee brace in combination in subjects with medial compartment knee osteoarthritis (OA).  
27 527 *Assistive technology : the official journal of RESNA.* 2019:1-8
- 28 528 27. Hunt MA, Charlton JM, Krowchuk NM, Tse CTF, Hatfield GL. Clinical and biomechanical changes  
29 529 following a 4-month toe-out gait modification program for people with medial knee osteoarthritis: a  
30 530 randomized controlled trial. *Osteoarthr Cartilage.* 2018;26(7):903-911
- 31 531 28. Arazpour M, Bani MA, Maleki M et al. Comparison of the efficacy of laterally wedged insoles and  
32 532 bespoke unloader knee orthoses in treating medial compartment knee osteoarthritis. *Prosthet Orthot*  
33 533 *Int.* 2012;37(1):50-57
- 34 534 29. Lim BW, Hinman RS, Wrigley TV, Sharma L, Bennell KL. Does knee malalignment mediate the  
35 535 effects of quadriceps strengthening on knee adduction moment, pain, and function in medial knee  
36 536 osteoarthritis? A randomized controlled trial. *Arthritis & Rheumatism.* 2008;59(7):943-951
- 37 537 30. Erhart-Hledik JC, Elspas B, Giori NJ, Andriacchi TP. Effect of variable-stiffness walking shoes on  
38 538 knee adduction moment, pain, and function in subjects with medial compartment knee osteoarthritis  
39 539 after 1 year. *J Orthop Res.* 2012;30(4):514-521
- 40 540 31. Bennell KL, Hunt MA, Wrigley TV et al. Hip strengthening reduces symptoms but not knee load in  
41 541 people with medial knee osteoarthritis and varus malalignment: a randomised controlled trial.  
42 542 *Osteoarthr Cartilage.* 2010;18(5):621-628
- 43 543 32. Cheung RTH, Ho KKW, Au IPH et al. Immediate and short-term effects of gait retraining on the  
44 544 knee joint moments and symptoms in patients with early tibiofemoral joint osteoarthritis: a  
45 545 randomized controlled trial. *Osteoarthr Cartilage.* 2018;26(11):1479-1486
- 46 546 33. Foughi N, Smith RM, Lange AK et al. Lower limb muscle strengthening does not change frontal

Knee osteoarthritis (KOA); Knee adduction moment (KAM); Knee adduction angular impulse (KAAI)

- 1  
2  
3 547 plane moments in women with knee osteoarthritis: A randomized controlled trial. *Clin Biomech.*  
4 548 2011;26(2):167-174
- 5 549 34. Barrios JA, Butler RJ, Crenshaw JR, Royer TD, Davis IS. Mechanical effectiveness of lateral foot  
6 550 wedging in medial knee osteoarthritis after 1 year of wear. *J Orthop Res.* 2013;31(5):659-664
- 7 551 35. Paterson KL, Kasza J, Bennell KL et al. Moderators and mediators of effects of unloading shoes on  
8 552 knee pain in people with knee osteoarthritis: an exploratory analysis of the SHARK randomised  
9 553 controlled trial. *Osteoarthr Cartilage.* 2018;26(2):227-235
- 10 554 36. Bennell KL, Kyriakides M, Metcalf B et al. Neuromuscular Versus Quadriceps Strengthening  
11 555 Exercise in Patients With Medial Knee Osteoarthritis and Varus Malalignment: A Randomized  
12 556 Controlled Trial. *Arthritis Rheumatol.* 2014;66(4):950-959
- 13 557 37. Hunt MA, Pollock CL, Kraus VB et al. Relationships amongst osteoarthritis biomarkers, dynamic  
14 558 knee joint load, and exercise: results from a randomized controlled pilot study. *BMC Musculoskelet*  
15 559 *Disord.* 2013;14:115
- 16 560 38. Holsgaard-Larsen A, Clausen B, Søndergaard J et al. The effect of instruction in analgesic use  
17 561 compared with neuromuscular exercise on knee-joint load in patients with knee osteoarthritis: a  
18 562 randomized, single-blind, controlled trial. *Osteoarthr Cartilage.* 2017;25(4):470-480
- 19 563 39. Trombini-Souza F, Matias AB, Yokota M et al. Long-term use of minimal footwear on pain, self-  
20 564 reported function, analgesic intake, and joint loading in elderly women with knee osteoarthritis: A  
21 565 randomized controlled trial. *Clin Biomech.* 2015;30(10):1194-1201
- 22 566 40. Song Q, Shen P, Mao M et al. Proprioceptive neuromuscular facilitation improves pain and  
23 567 descending mechanics among elderly with knee osteoarthritis. *Scand J Med Sci Spor.*  
24 568 2020;30(9):1655-1663
- 25 569 41. Wang X, Xie X, Hou M et al. [Kinetic mechanism of electroacupuncture for stair climbing in knee  
26 570 osteoarthritis patients]. *Zhongguo zhen jiu = Chinese acupuncture & moxibustion.*  
27 571 2017;37(10):1027-34
- 28 572 42. Robert-Lachaine X, Dessery Y, Belzile ÉL, Turmel S, Corbeil P. Three-month efficacy of three knee  
29 573 braces in the treatment of medial knee osteoarthritis in a randomized crossover trial. *Journal of*  
30 574 *orthopaedic research : official publication of the Orthopaedic Research Society.* 2020;38(10):2262-  
31 575 2271
- 32 576 43. Cooper NJ, Kendrick D, Achana F et al. Network meta-analysis to evaluate the effectiveness of  
33 577 interventions to increase the uptake of smoke alarms. *Epidemiol Rev.* 2012;34:32-45
- 34 578 44. Jones RK, Nester CJ, Richards JD et al. A comparison of the biomechanical effects of valgus knee  
35 579 braces and lateral wedged insoles in patients with knee osteoarthritis. *Gait Posture.*  
36 580 2013;37(3):368-72
- 37 581 45. Schmid CH, Stark PC, Berlin JA, Landais P, Lau J. Meta-regression detected associations between  
38 582 heterogeneous treatment effects and study-level, but not patient-level, factors. *J Clin Epidemiol.*  
39 583 2004;57(7):683-97
- 40 584 46. Thompson SG, Higgins JPT. How should meta-regression analyses be undertaken and interpreted?  
41 585 *Stat Med.* 2002;21(11):1559-73
- 42 586 47. Lambert PC, Sutton AJ, Abrams KR, Jones DR. A comparison of summary patient-level covariates  
43 587 in meta-regression with individual patient data meta-analysis. *J Clin Epidemiol.* 2002;55(1):86-94
- 44 588 48. Arnold JB, Wong DX, Jones RK, Hill CL, Thewlis D. Lateral Wedge Insoles for Reducing  
45 589 Biomechanical Risk Factors for Medial Knee Osteoarthritis Progression: A Systematic Review and  
46 590 Meta-Analysis. *Arthrit Care Res.* 2016;68(7):936-951

Knee osteoarthritis (KOA); Knee adduction moment (KAM); Knee adduction angular impulse (KAAl)



- 1  
2  
3 591 49. Hinman RS, Bowles KA, Bennell KL. Laterally wedged insoles in knee osteoarthritis: do  
4 592 biomechanical effects decline after one month of wear? *Bmc Musculoskel Dis.* 2009;10:146  
5 593 50. Bennell KL, Hinman RS. A review of the clinical evidence for exercise in osteoarthritis of the hip  
6 594 and knee. *J Sci Med Sport.* 2011;14(1):4-9  
7 595 51. Fransen M, McConnell S, Hernandez-Molina G, Reichenbach S. Exercise for osteoarthritis of the  
8 596 hip. *The Cochrane database of systematic reviews.* 2009;(3):CD007912  
9 597 52. Fransen M, McConnell S. Exercise for osteoarthritis of the knee. *The Cochrane database of*  
10 598 *systematic reviews.* 2008;(4):CD004376  
11 599 53. Fu HCH, Lie CWH, Ng TP et al. Prospective study on the effects of orthotic treatment for medial  
12 600 knee osteoarthritis in Chinese patients: clinical outcome and gait analysis. *Hong Kong medical*  
13 601 *journal = Xianggang yi xue za zhi.* 2015;21(2):98  
14 602 54. Divine JG, Hewett TE. Valgus Bracing for Degenerative Knee Osteoarthritis. *The Physician and*  
15 603 *Sportsmedicine.* 2005;33(2):40-46  
16 604 55. Goh S, Persson MSM, Stocks J et al. Efficacy and potential determinants of exercise therapy in knee  
17 605 and hip osteoarthritis: A systematic review and meta-analysis. *Annals of Physical and Rehabilitation*  
18 606 *Medicine.* 2019;62(5):356-365  
19 607 56. Maly MR. Abnormal and cumulative loading in knee osteoarthritis. *Curr Opin Rheumatol.*  
20 608 2008;20(5):547-52  
21 609 57. Bennell KL, Bowles K, Wang Y et al. Higher dynamic medial knee load predicts greater cartilage  
22 610 loss over 12 months in medial knee osteoarthritis. *Ann Rheum Dis.* 2011;70(10):1770-4  
23 611 58. Hunt MA, Pollock CL, Kraus VB et al. Relationships amongst osteoarthritis biomarkers, dynamic  
24 612 knee joint load, and exercise: results from a randomized controlled pilot study. *Bmc Musculoskel*  
25 613 *Dis.* 2013;14:115  
26 614 59. Maleki M, Arazpour M, Joghtaei M et al. The effect of knee orthoses on gait parameters in medial  
27 615 knee compartment osteoarthritis: A literature review. *Prosthet Orthot Int.* 2016;40(2):193-201  
28  
29  
30  
31  
32  
33  
34  
35  
36 616  
37  
38  
39  
40  
41  
42  
43  
44  
45  
46  
47  
48  
49  
50  
51  
52  
53  
54  
55  
56  
57  
58  
59  
60

**Table 1. Characteristics of included studies (1) \***

| Authors                     | Country   | Clinical criteria†                                                                         | Radiographic features                                | Intervention                                                                                                                 | Comparisons                   | Follow up |
|-----------------------------|-----------|--------------------------------------------------------------------------------------------|------------------------------------------------------|------------------------------------------------------------------------------------------------------------------------------|-------------------------------|-----------|
| Barrios 2013 <sup>34</sup>  | US        | Medial compartment knee OA;<br>Pain VAS ( $\geq 3$ of 10 upon walking)                     | K/L grade $\geq 2$ , medial tibiofemoral compartment | bespoke full-length LWI                                                                                                      | Placebo                       | 12 months |
| Hinman 2016 <sup>35</sup>   | Australia | Medial compartment knee OA;<br>Pain NRS ( $> 4$ of 11 upon walking) over the previous week | K/L grade $\geq 2$ , medial tibiofemoral compartment | 5° full-length LWI                                                                                                           | Placebo                       | 6 months  |
| Arazpour 2012 <sup>28</sup> | Iran      | Medial compartment knee OA                                                                 | K/L grade 1 and 2, medial tibiofemoral compartment   | 6° full-length LWI                                                                                                           | bespoke unloader knee braces  | 6 weeks   |
| Jones 2013 <sup>25</sup>    | UK        | Medial compartment knee OA                                                                 | K/L grade 2 and 3, medial JSN                        | LWI: The heel was inclined at 5° with the inclination reduced to 0° at the 5th metatarsal head with a contoured arch profile | 6° valgus knee brace          | 2 weeks   |
| Khosravi 2019 <sup>26</sup> | Iran      | Medial compartment knee OA                                                                 | K/L grade 2 and 3                                    | Full length custom-made LWI; LWI+ knee brace                                                                                 | three-point valgus knee brace | 6 weeks   |

Knee osteoarthritis (KOA); Knee adduction moment (KAM); Knee adduction angular impulse (KAAI)



\* OA=osteoarthritis; LWI=lateral wedged insoles; VAS=visual analog scale; NRS=numerical rating scale; K/L=Kellgren/Lawrence; NR=not reported; JSN=joint space narrowing;

**Tables**

For peer review only

Knee osteoarthritis (KOA); Knee adduction moment (KAM); Knee adduction angular impulse (KAAI)

**Table 1. Characteristics of included studies (2) \***

| Authors                          | Country   | Clinical criteria†                                                                                         | Radiographic features                                | Intervention                                                   | Comparisons                     | Follow up |
|----------------------------------|-----------|------------------------------------------------------------------------------------------------------------|------------------------------------------------------|----------------------------------------------------------------|---------------------------------|-----------|
| Hunt 2018 <sup>27</sup>          | US        | Medial compartment knee OA;<br>Pain ( $\geq 3$ of 10) longer than 6 months                                 | K/L grade $\geq 2$ , medial tibiofemoral compartment | Toe-out gait modification                                      | Walking without any guidance    | 4 months  |
| Lim 2008 <sup>29</sup>           | Australia | Medial compartment knee OA;<br>Medial knee pain                                                            | K/L grade $\geq 2$ , medial JSN                      | Quadriceps strengthening                                       | No intervention                 | 12 weeks  |
| Erhart-Hledik 2012 <sup>30</sup> | US        | Medial compartment knee OA;<br>Medial knee pain                                                            | K/L grade $\geq 1$                                   | Variable-stiffness shoe with stiffer soles on the lateral side | Constant-stiffness control shoe | 12 months |
| Bennell 2010 <sup>31</sup>       | Australia | Medial compartment knee OA;<br>Varus malalignment; Pain ( $> 3$ of 11 upon walking)                        | K/L grade $\geq 2$ , medial JSN                      | Hip strengthening                                              | No intervention                 | 13 weeks  |
| Cheung 2018 <sup>32</sup>        | China     | Medial compartment knee OA;<br>Knee pain occurred at least one day a week during each of the 8 weeks prior | K/L grade 1 and 2                                    | Gait retraining for KAM reduction                              | Walking without any guidance    | 6 weeks   |

\* OA=osteoarthritis; LWI=lateral wedged insoles; VAS=visual analog scale; NRS=numerical rating scale; K/L=Kellgren/Lawrence; NR=not reported; JSN=joint space narrowing;

Knee osteoarthritis (KOA); Knee adduction moment (KAM); Knee adduction angular impulse (KAAI)

**Table 1. Characteristics of included studies (3) \***

| Authors                                | Country   | Clinical criteria†                                                                      | Radiographic features                                   | Intervention           | Comparisons                 | Follow up |
|----------------------------------------|-----------|-----------------------------------------------------------------------------------------|---------------------------------------------------------|------------------------|-----------------------------|-----------|
| Foroughi 2011 <sup>33</sup>            | Australia | Primary knee OA                                                                         | K/L grade $\geq 1$                                      | Lower limb exercise    | Sham-exercise               | 6 months  |
| Bennell 2014 <sup>36</sup>             | Australia | Medial compartment knee OA;<br>Pain VAS ( $\geq 25$ of 100) over the<br>past week       | K/L grade $\geq 2$ , medial<br>tibiofemoral compartment | Neuromuscular exercise | Quadriceps<br>strengthening | 12 weeks  |
| Hunt 2013 <sup>37</sup>                | Canada    | Medial compartment knee OA;<br>Knee pain $> 3/10$ on most days of<br>the previous month | K/L grade $\geq 2$ , medial<br>tibiofemoral compartment | Lower limb exercise    | No intervention             | 11 weeks  |
| Holsgaard-Larsen<br>2017 <sup>38</sup> | Denmark   | Primary knee OA<br><br>Pain KOOS ( $< 80$ of 100, at<br>least mild pain)                | K/L grade $\leq 3$                                      | Neuromuscular exercise | Analgesic advice            | 8 weeks   |

\* OA=osteoarthritis; LWI=lateral wedged insoles; VAS=visual analog scale; NRS=numerical rating scale; K/L=Kellgren/Lawrence; NR=not reported; JSN=joint space narrowing;

Knee osteoarthritis (KOA); Knee adduction moment (KAM); Knee adduction angular impulse (KAAI)

| Authors                            | Country | Clinical criteria†                                                                      | Radiographic features | Intervention                                                                                                                                                              | Comparisons                                                             | Follow up |
|------------------------------------|---------|-----------------------------------------------------------------------------------------|-----------------------|---------------------------------------------------------------------------------------------------------------------------------------------------------------------------|-------------------------------------------------------------------------|-----------|
| Song 2020 <sup>40</sup>            | China   | Medial compartment knee OA in one or both legs.                                         | K/L grade $\leq 3$    | PNF (one-hour sessions three times a week)                                                                                                                                | Watch television or read magazines at the same time                     | 12 weeks  |
| Wang 2017 <sup>41</sup>            | China   | Medial compartment knee OA                                                              | K/L grade 2 and 3     | Acupuncture with 2 Hz continuous wave in Neixiyan (EX-LE 4), Dubi (ST 35), Yanglingquan (GB 34), Yinlingquan (SP 9), Xuehai (SP 10), Liangqiu (ST 34) and Zusanli (ST 36) | 2 cm next to the same acupoints with shallow acupuncture and no current | Immediate |
| Robert-Lachaine 2020 <sup>42</sup> | Canada  | Medial compartment knee OA; Pain > 31/100 on WOMAC; Varus knee alignment $\geq 2^\circ$ | K/L grade 2 and 3     | V3P-brace; VER-brace; ACL-brace (wear the brace as often as possible)                                                                                                     | /                                                                       | 3 months  |
| Trombini-Souza 2015 <sup>39</sup>  | Brazil  | Medial compartment knee OA; Knee pain between 3 and 8 on VAS                            | K/L grade 2 and 3     | Minimalist footwear (Moleca®)                                                                                                                                             | Standard, neutral tennis shoe                                           | 6 months  |

\* OA=osteoarthritis; LWI=lateral wedged insoles; VAS=visual analog scale; NRS=numerical rating scale; K/L=Kellgren/Lawrence; NR=not reported; JSN=joint space narrowing; PNF=Proprioceptive neuromuscular facilitation; V3P-brace= three-point bending system valgus knee brace; VER-brace= unloader brace with valgus and external rotation functions; ACL-brace= functional medial-lateral stabilization brace used after ligament injuries; The Moleca® shoe is a low-cost women's double canvas, flexible, flat, walking shoe without heels, with a 5-mm anti-slip rubber sole and a 3-mm flat insole of ethylene vinyl acetate that provides only protection but no correction of any kind.

Knee osteoarthritis (KOA); Knee adduction moment (KAM); Knee adduction angular impulse (KAAI)

**Table 2. Characteristics of participants in included studies (1) \***

| Authors                     | No. | Sex, M:F | Age, years | Height, meters | Body mass, kg | BMI, kg/m <sup>2</sup> | Bilateral knee<br>OA included | K/L grade, no. |    |    |    | Main<br>outcomes                                 |
|-----------------------------|-----|----------|------------|----------------|---------------|------------------------|-------------------------------|----------------|----|----|----|--------------------------------------------------|
|                             |     |          |            |                |               |                        |                               | 1              | 2  | 3  | 4  |                                                  |
| Barrios 2013 <sup>34</sup>  | 38  | NR       | 61.90±8.37 | NR             | NR            | 32.00±7.43             | NR                            | 0              | 17 | 14 | 7  | 1 <sup>st</sup> KAM;<br>KAAI                     |
| Hinman 2016 <sup>35</sup>   | 164 | 20:21    | 64.30±7.45 | 1.67 ± 0.10    | 82.95±14.76   | 29.70±3.64             | NR                            | 0              | 49 | 52 | 63 | 1 <sup>st</sup> KAM;<br>KAAI                     |
| Arazpour 2012 <sup>28</sup> | 24  | 3:4      | 59.29±2.37 | NR             | NR            | 27.01±1.71             | Yes                           | 9              | 15 | 0  | 0  | 1 <sup>st</sup> KAM                              |
| Jones 2013 <sup>25</sup>    | 28  | 4:3      | 66.30±8.20 | 1.75±0.13      | 88.7±15.10    | NR                     | No                            | 0              | 10 | 18 | 0  | 1 <sup>st</sup> and 2 <sup>nd</sup><br>KAM; KAAI |
| Khosravi 2019 <sup>26</sup> | 21  | 13:8     | 58.97±6.80 | 1.62±0.11      | 79.11±9.35    | NR                     | NR                            | 0              | 9  | 12 | 0  | 1 <sup>st</sup> KAM                              |

\* Values are the mean±SD unless indicated otherwise. BMI=body mass index; K/L=Kellgren/Lawrence; NR=not reported; JSN=joint space narrowing; KAM=knee adduction moment; KAAI=knee adduction angular impulse.

**Table 2. Characteristics of participants in included studies (2) \***

Knee osteoarthritis (KOA); Knee adduction moment (KAM); Knee adduction angular impulse (KAAI)

| Authors                             | No. | Sex, M:F | Age, years | Height, meters | Body mass, kg | BMI, kg/m <sup>2</sup> | Bilateral knee<br>OA included | K/L grade, no. |    |    |    | Main<br>outcomes                                 |
|-------------------------------------|-----|----------|------------|----------------|---------------|------------------------|-------------------------------|----------------|----|----|----|--------------------------------------------------|
|                                     |     |          |            |                |               |                        |                               | 1              | 2  | 3  | 4  |                                                  |
| Hunt 2018 <sup>27</sup>             | 79  | 24:55    | 64.99±8.60 | 1.65±0.10      | 74.59±13.15   | 27.35±3.48             | Yes                           | 0              | 37 | 31 | 11 | 1 <sup>st</sup> and 2 <sup>nd</sup><br>KAM; KAAI |
| Lim 2008 <sup>29</sup>              | 107 | 48:59    | 64.60±8.51 | 1.65±0.10      | 79.41±15.32   | 28.96±4.85             | Yes                           | 0              | 34 | 29 | 44 | 1 <sup>st</sup> KAM                              |
| Erhart-Hledik<br>2012 <sup>30</sup> | 79  | 41:38    | 61.70±9.43 | 1.69±0.08      | 79.50±15.07   | 27.51±4.87             | Yes                           | NR             | NR | NR | NR | 1 <sup>st</sup> KAM                              |
| Bennell 2010 <sup>31</sup>          | 89  | 46:43    | 64.55±8.34 | NR             | NR            | 27.94±4.41             | Yes                           | 0              | 30 | 29 | 30 | 1 <sup>st</sup> KAM;<br>KAAI                     |
| Cheung 2018 <sup>32</sup>           | 20  | 1:1      | 61.95±6.11 | 1.63±0.09      | 65.85±6.64    | 27.35±3.48             | NR                            | 5              | 15 | 0  | 0  | 1 <sup>st</sup> KAM                              |

\* Values are the mean±SD unless indicated otherwise. BMI=body mass index; K/L=Kellgren/Lawrence; NR=not reported; JSN=joint space narrowing; KAM=knee adduction moment; KAAI=knee adduction angular impulse.

**Table 2. Characteristics of participants in included studies (3) \***

Knee osteoarthritis (KOA); Knee adduction moment (KAM); Knee adduction angular impulse (KAAI)

|                                                            | Authors                                | No. | Sex, M:F | Age, years | Height, meters | Body mass, kg | BMI, kg/m <sup>2</sup> | Bilateral knee<br>OA included | K/L grade, no. |    |    |    | Main<br>outcomes                               |
|------------------------------------------------------------|----------------------------------------|-----|----------|------------|----------------|---------------|------------------------|-------------------------------|----------------|----|----|----|------------------------------------------------|
|                                                            |                                        |     |          |            |                |               |                        |                               | 1              | 2  | 3  | 4  |                                                |
| 1<br>2<br>3<br>4<br>5                                      | Foroughi 2011 <sup>33</sup>            | 54  | 0:54     | 65.48±7.44 | NR             | 82.87±18.43   | 32.07±7.08             | Yes                           | 20             | 7  | 20 | 1  | 1 <sup>st</sup> and 2 <sup>nd</sup><br><br>KAM |
| 6<br>7<br>8<br>9<br>10<br>11<br>12<br>13<br>14<br>15<br>16 | Bennell 2014 <sup>36</sup>             | 100 | 48:52    | 62.45±7.32 | 1.67±0.10      | 82.70±14.29   | 29.65±4.08             | Yes                           | 0              | 22 | 43 | 35 | 1 <sup>st</sup> KAM;<br><br>KAAI               |
| 17<br>18<br>19<br>20<br>21                                 | Hunt 2013 <sup>37</sup>                | 17  | 8:9      | 66.10±11.3 | NR             | NR            | 27.00±4.50             | Yes                           | 0              | 10 | 5  | 2  | 1 <sup>st</sup> KAM;<br><br>KAAI               |
| 22<br>23<br>24<br>25<br>26                                 | Holsgaard-Larsen<br>2017 <sup>38</sup> | 93  | 39:54    | 58.10±7.96 | NR             | 79.64±12.49   | 26.90±3.09             | NR                            | 45             | 31 | 17 | 0  | 1 <sup>st</sup> KAM;<br><br>KAAI               |

\* Values are the mean±SD unless indicated otherwise. BMI=body mass index; K/L=Kellgren/Lawrence; NR=not reported; JSN=joint space narrowing; KAM=knee adduction moment; KAAI=knee adduction angular impulse.

**Table 2. Characteristics of participants in included studies (4) \***

Knee osteoarthritis (KOA); Knee adduction moment (KAM); Knee adduction angular impulse (KAAI)

| Authors                               | No. | Sex, M:F | Age, years | Height, meters | Body mass, kg | BMI, kg/m <sup>2</sup> | Bilateral knee<br>OA included | K/L grade, no. |    |    |   | Main<br>outcomes                                 |
|---------------------------------------|-----|----------|------------|----------------|---------------|------------------------|-------------------------------|----------------|----|----|---|--------------------------------------------------|
|                                       |     |          |            |                |               |                        |                               | 1              | 2  | 3  | 4 |                                                  |
| Song 2020 <sup>40</sup>               | 36  | 1:1      | 68.01±3.91 | 1.62±0.07      | 68.16±6.77    | NR                     | Yes                           | 9              | 20 | 7  | 0 | 1 <sup>st</sup> KAM                              |
| Wang 2017 <sup>41</sup>               | 36  | 1:5      | 63.50±7.95 | NR             | NR            | 23.75±2.66             | Yes                           | 0              | 19 | 17 | 0 | 1 <sup>st</sup> and 2 <sup>nd</sup><br>KAM       |
| Robert-Lachaine<br>2020 <sup>42</sup> | 24  | 7:5      | 57.20±8.60 | 1.68±0.09      | 89.30±18.70   | 31.40±5.00             | NR                            | 0              | 15 | 8  | 0 | 1 <sup>st</sup> and 2 <sup>nd</sup><br>KAM; KAAI |
| Trombini-Souza<br>2015 <sup>39</sup>  | 56  | NR       | 66.00±5.00 | 1.60±0.10      | 73.40±13.10   | NR                     | NR                            | 0              | NR | NR | 0 | 1 <sup>st</sup> KAM;<br>KAAI                     |

\* Values are the mean±SD unless indicated otherwise. BMI=body mass index; K/L=Kellgren/Lawrence; NR=not reported; JSN=joint space narrowing; KAM=knee adduction moment; KAAI=knee adduction angular impulse.

|          |                      |                      |   |                      |                                   |   |                      |                                   |                      |
|----------|----------------------|----------------------|---|----------------------|-----------------------------------|---|----------------------|-----------------------------------|----------------------|
| <b>J</b> | 0.41<br>(-0.66,1.49) | 0.16<br>(-0.46,0.79) | - | 0.20<br>(-0.23,0.64) | <b>0.81</b><br><b>(0.17,1.45)</b> | - | 0.30<br>(-0.61,1.21) | <b>0.54</b><br><b>(0.02,1.07)</b> | 0.32<br>(-0.10,0.75) |
|----------|----------------------|----------------------|---|----------------------|-----------------------------------|---|----------------------|-----------------------------------|----------------------|

Knee osteoarthritis (KOA); Knee adduction moment (KAM); Knee adduction angular impulse (KAAI)



|                                      |                                      |                                      |                                   |                                   |                                      |                       |                       |                       |                                      |
|--------------------------------------|--------------------------------------|--------------------------------------|-----------------------------------|-----------------------------------|--------------------------------------|-----------------------|-----------------------|-----------------------|--------------------------------------|
| 0.28<br>(-0.34,0.89)                 | <b>I</b>                             | -0.25<br>(-1.33,0.84)                | -                                 | -0.21<br>(-1.37,0.95)             | 0.40<br>(-0.70,1.49)                 | -                     | -0.12<br>(-1.39,1.16) | 0.13<br>(-0.90,1.16)  | -0.09<br>(-1.08,0.90)                |
| 0.07<br>(-0.50,0.64)                 | -0.21<br>(-0.89,0.47)                | <b>H</b>                             | -                                 | 0.04<br>(-0.72,0.80)              | 0.64<br>(-0.01,1.30)                 | -                     | 0.13<br>(-0.79,1.05)  | 0.38<br>(-0.16,0.92)  | 0.16<br>(-0.29,0.61)                 |
| <b>-0.69</b><br><b>(-1.36,-0.02)</b> | <b>-0.97</b><br><b>(-1.73,-0.21)</b> | <b>-0.76</b><br><b>(-1.49,-0.03)</b> | <b>G</b>                          | -                                 | -                                    | -                     | -                     | -                     | -                                    |
| 0.24<br>(-0.11,0.59)                 | -0.04<br>(-0.64,0.57)                | 0.17<br>(-0.39,0.74)                 | <b>0.93</b><br><b>(0.27,1.60)</b> | <b>F</b>                          | 0.61<br>(-0.17,1.38)                 | -                     | 0.09<br>(-0.91,1.10)  | 0.34<br>(-0.34,1.02)  | 0.12<br>(-0.49,0.73)                 |
| <b>0.89</b><br><b>(0.35,1.44)</b>    | 0.62<br>(-0.04,1.28)                 | <b>0.83</b><br><b>(0.20,1.45)</b>    | <b>1.59</b><br><b>(0.87,2.30)</b> | <b>0.65</b><br><b>(0.11,1.19)</b> | <b>E</b>                             | -                     | -0.51<br>(-1.45,0.42) | -0.27<br>(-0.83,0.30) | <b>-0.48</b><br><b>(-0.96,-0.01)</b> |
| <b>1.28</b><br><b>(0.21,2.36)</b>    | 1.01<br>(-0.13,2.14)                 | <b>1.22</b><br><b>(0.10,2.33)</b>    | <b>1.98</b><br><b>(0.81,3.15)</b> | 1.04<br>(-0.03,2.11)              | 0.39<br>(-0.71,1.49)                 | <b>D</b>              | -                     | -                     | -                                    |
| <b>0.78</b><br><b>(0.11,1.45)</b>    | 0.50<br>(-0.26,1.27)                 | 0.71<br>(-0.02,1.44)                 | <b>1.47</b><br><b>(0.66,2.29)</b> | 0.54<br>(-0.12,1.20)              | -0.11<br>(-0.83,0.60)                | -0.50<br>(-1.46,0.46) | <b>C</b>              | 0.25<br>(-0.50,0.99)  | 0.03<br>(-0.77,0.83)                 |
| <b>0.56</b><br><b>(0.10,1.02)</b>    | 0.29<br>(-0.30,0.87)                 | 0.49<br>(-0.05,1.04)                 | <b>1.26</b><br><b>(0.61,1.90)</b> | 0.32<br>(-0.13,0.77)              | -0.33<br>(-0.85,0.19)                | -0.72<br>(-1.70,0.25) | -0.22<br>(-0.71,0.27) | <b>B</b>              | -0.22<br>(-0.52,0.08)                |
| <b>0.37</b><br><b>(0.02,0.71)</b>    | 0.09<br>(-0.42,0.60)                 | 0.30<br>(-0.15,0.75)                 | <b>1.06</b><br><b>(0.49,1.63)</b> | 0.13<br>(-0.21,0.46)              | <b>-0.53</b><br><b>(-0.95,-0.10)</b> | -0.92<br>(-1.94,0.10) | -0.41<br>(-0.99,0.16) | -0.19<br>(-0.49,0.10) | <b>A</b>                             |

**Table 3. Detailed results of network meta-analysis for the First peak KAM (grey) and KAAI (white). Data are SMDs (from the top left to the bottom right, higher comparator versus lower comparator) and their related 95%CI. Bold texts in the table mean SMDs are statistically significant.**

**A= Standard care; B= Lateral Wedge Insole; C= Knee Brace; D= Lateral Wedge Insole+ Knee Brace; E= Gait retraining; F= Quadriceps strengthening; G= Variable-stiffness shoe; H= Hip strengthening; I= Lower limb exercise; J= Neuromuscular exercise.**

## Box

Knee osteoarthritis (KOA); Knee adduction moment (KAM); Knee adduction angular impulse (KAAI)

**Box 1. Inclusion criteria**

## Design

- Randomised controlled trial

## Participants

- People with radiologically confirmed knee osteoarthritis

## Intervention

- Manual therapy
- Aerobic exercise
- Pulsed electrical stimulation (PES)
- Acupuncture
- Knee braces
- Ice/cooling treatment
- Pulsed electromagnetic fields (PEMF)
- Balneotherapy
- Interferential therapy
- Transcutaneous electric Nerve stimulation (TENS)
- Heat treatment
- Foot orthoses
- Laser/light therapy
- Muscle-strengthening exercise
- Static magnets
- Tai Chi
- Athletic tape
- Neuromuscular electrical stimulation (NMES)

## Comparator

- Control group (no/sham exercise or placebo)

## Outcome measures

- KAM and KAAI obtained under the condition of bare foot.

## Comparisons

- All interventions compared to the comparator and to each other

**Figure Legends**

Knee osteoarthritis (KOA); Knee adduction moment (KAM); Knee adduction angular impulse (KAAI)

1 **Figure 1. Flow chart of the study selection**

2 **Figure 2. Rankings for effects on First peak KAM. Graph displays distribution of probabilities for each treatment. X-axis represents the possible rank of each treatment (from the**  
3 **best to worst according to the outcomes), Y-axis represents the cumulative probability for each treatment to be the best option, among the best two options, among the best three**  
4 **options, and so on. A= Standard care; B= Lateral Wedge Insole; C= Knee Brace; D= Lateral Wedge Insole+ Knee Brace; E= Gait retraining; F= Quadriceps strengthening; G=**  
5 **Variable-stiffness shoe; H= Hip strengthening; I= Lower limb exercise; J= Neuromuscular exercise.**

6 **Figure 3. Rankings for effects on KAAI. Graph displays distribution of probabilities for each treatment. X-axis represents the possible rank of each treatment (from the best to worst**  
7 **according to the outcomes), Y-axis represents the cumulative probability for each treatment to be the best option, among the best two options, among the best three options, and so**  
8 **on. A= Standard care; B= Lateral Wedge Insole; C= Knee Brace; E= Gait retraining; F= Quadriceps strengthening; H= Hip strengthening; I= Lower limb exercise; J= Neuromuscular**  
9 **exercise.**

10 **Figure 4. Risk of bias summary**

11  
12  
13  
14  
15  
16  
17  
18  
19  
20  
21  
22  
23  
24  
25  
26  
27  
28  
29  
30  
31  
32  
33  
34  
35  
36  
37  
38  
39  
40  
41  
42  
43  
44  
45  
46

For peer review only

Knee osteoarthritis (KOA); Knee adduction moment (KAM); Knee adduction angular impulse (KAAI)

**Initial citations retrieved from database search (n=4919)**

**Duplicates (n=1350)**

**Title and abstracts screened (n= 3569)**

**Studies were excluded based on titles/abstracts (n=3043)**

- ◆ Non-related topic (n=762)
- ◆ Other medication (n=856)
- ◆ Not OA study (n=512)
- ◆ Protocol (n=150)
- ◆ Letter, editorial, review article, case report (n=763)

**Studies were obtained for full-text evaluation (n= 526)**

**Full-text articles were excluded for the following reasons(n=508)**

- ◆ Not randomized controlled trial (n=256)
- ◆ No suitable control group (n=35)
- ◆ Not OA study (n=8)
- ◆ No suitable data(n=119)
- ◆ Surgical intervention(n=51)
- ◆ Duplicates (n=39)

**Not eligible for NMA but included in systematic review(n=4)**

**Included in final NMA(n=14)**

1  
2  
3  
4  
5  
6  
7  
8  
9  
10  
11  
12  
13  
14  
15  
16  
17  
18  
19  
20  
21  
22  
23  
24  
25  
26  
27  
28  
29  
30  
31  
32  
33  
34  
35  
36  
37  
38  
39  
40  
41  
42  
43  
44  
45  
46  
47  
48  
49  
50  
51  
52  
53  
54  
55  
56  
57  
58  
59  
60

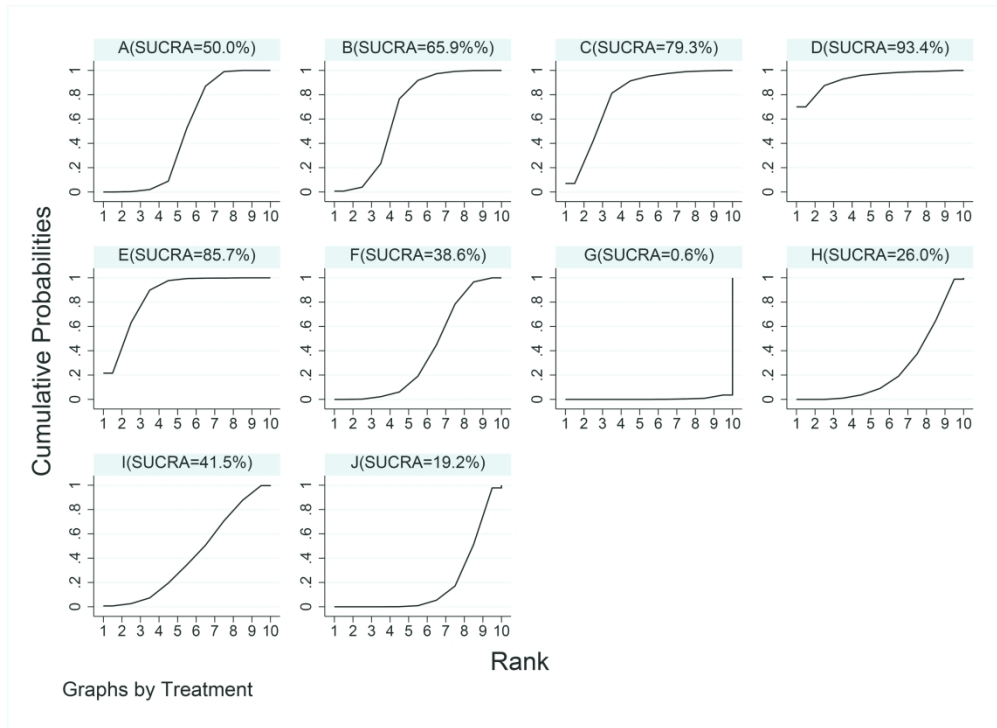

Figure 2

139x101mm (600 x 600 DPI)

1  
2  
3  
4  
5  
6  
7  
8  
9  
10  
11  
12  
13  
14  
15  
16  
17  
18  
19  
20  
21  
22  
23  
24  
25  
26  
27  
28  
29  
30  
31  
32  
33  
34  
35  
36  
37  
38  
39  
40  
41  
42  
43  
44  
45  
46  
47  
48  
49  
50  
51  
52  
53  
54  
55  
56  
57  
58  
59  
60

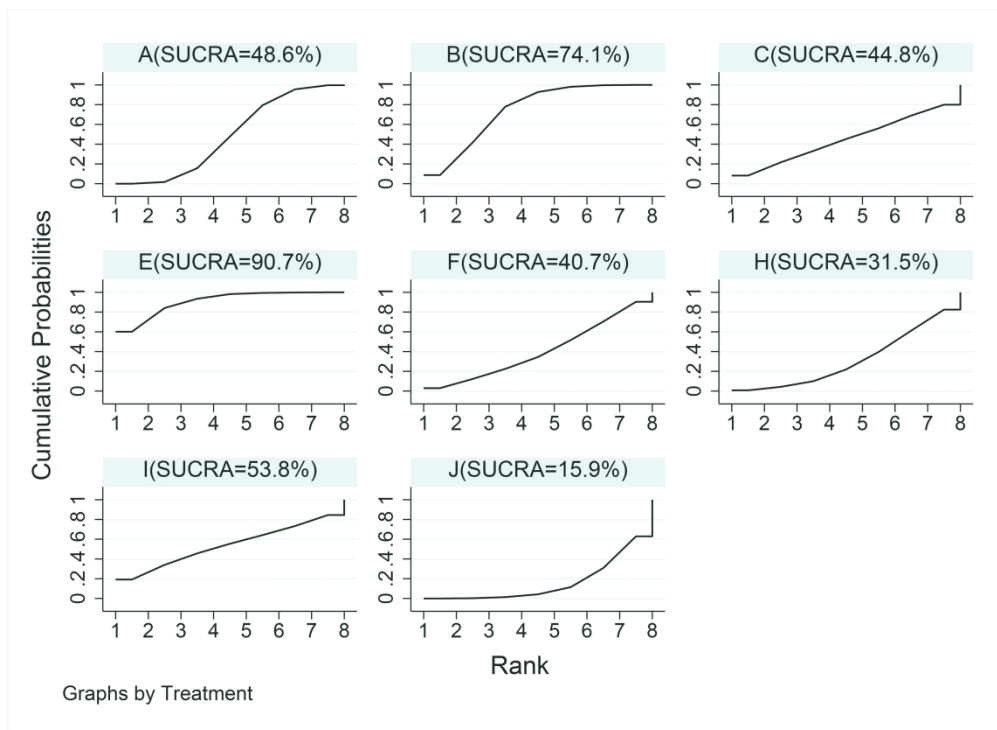

Figure 3

139x101mm (600 x 600 DPI)

1  
2  
3  
4  
5  
6  
7  
8  
9  
10  
11  
12  
13  
14  
15  
16  
17  
18  
19  
20  
21  
22  
23  
24  
25  
26  
27  
28  
29  
30  
31  
32  
33  
34  
35  
36  
37  
38  
39  
40  
41  
42  
43  
44  
45  
46  
47  
48  
49  
50  
51  
52  
53  
54  
55  
56  
57  
58  
59  
60

For peer review only

1  
2  
3  
4  
5  
6  
7  
8  
9  
10  
11  
12  
13  
14  
15  
16  
17  
18  
19  
20  
21  
22  
23  
24  
25  
26  
27  
28  
29  
30  
31  
32  
33  
34  
35  
36  
37  
38  
39  
40  
41  
42  
43  
44  
45  
46  
47  
48  
49  
50  
51  
52  
53  
54  
55  
56  
57  
58  
59  
60

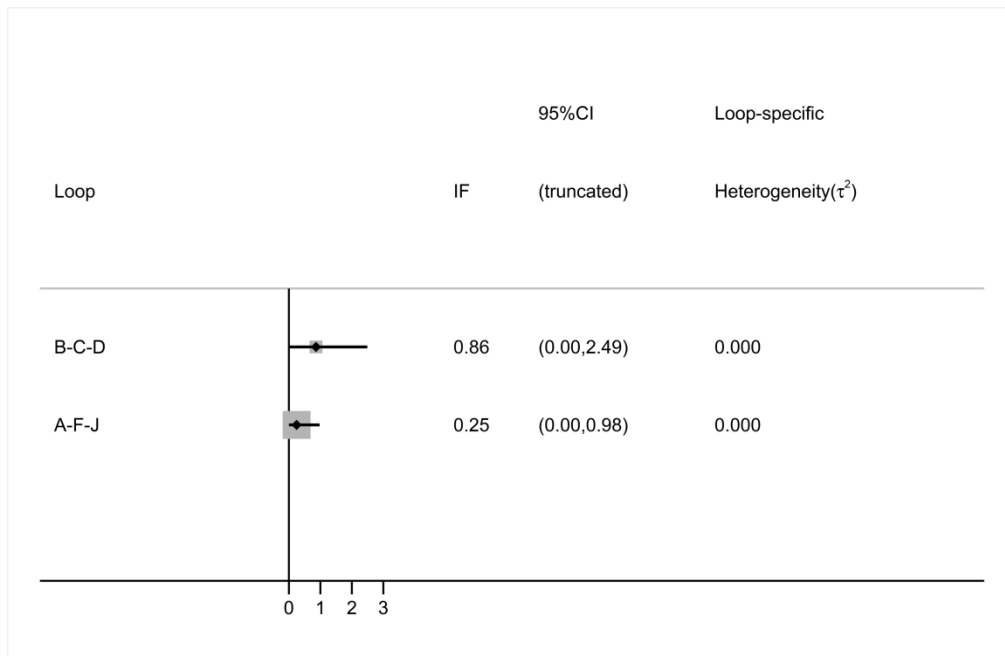

eFigure 1

146x95mm (600 x 600 DPI)



1  
2  
3  
4  
5  
6  
7  
8  
9  
10  
11  
12  
13  
14  
15  
16  
17  
18  
19  
20  
21  
22  
23  
24  
25  
26  
27  
28  
29  
30  
31  
32  
33  
34  
35  
36  
37  
38  
39  
40  
41  
42  
43  
44  
45  
46  
47  
48  
49  
50  
51  
52  
53  
54  
55  
56  
57  
58  
59  
60

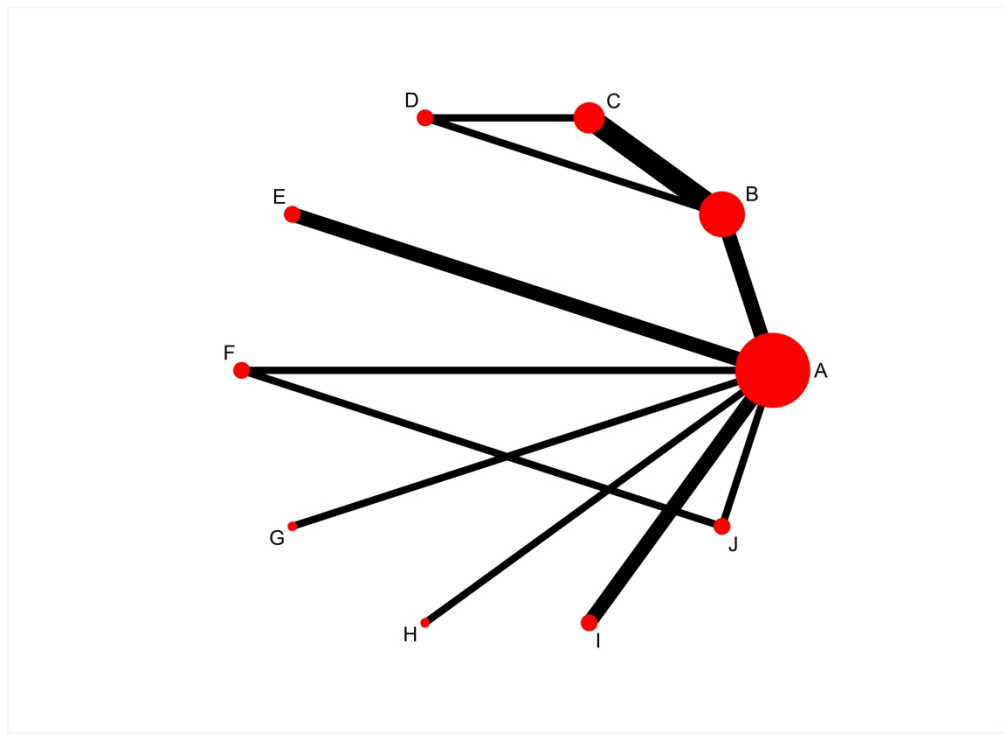

eFigure 2a

139x101mm (600 x 600 DPI)

1  
2  
3  
4  
5  
6  
7  
8  
9  
10  
11  
12  
13  
14  
15  
16  
17  
18  
19  
20  
21  
22  
23  
24  
25  
26  
27  
28  
29  
30  
31  
32  
33  
34  
35  
36  
37  
38  
39  
40  
41  
42  
43  
44  
45  
46  
47  
48  
49  
50  
51  
52  
53  
54  
55  
56  
57  
58  
59  
60

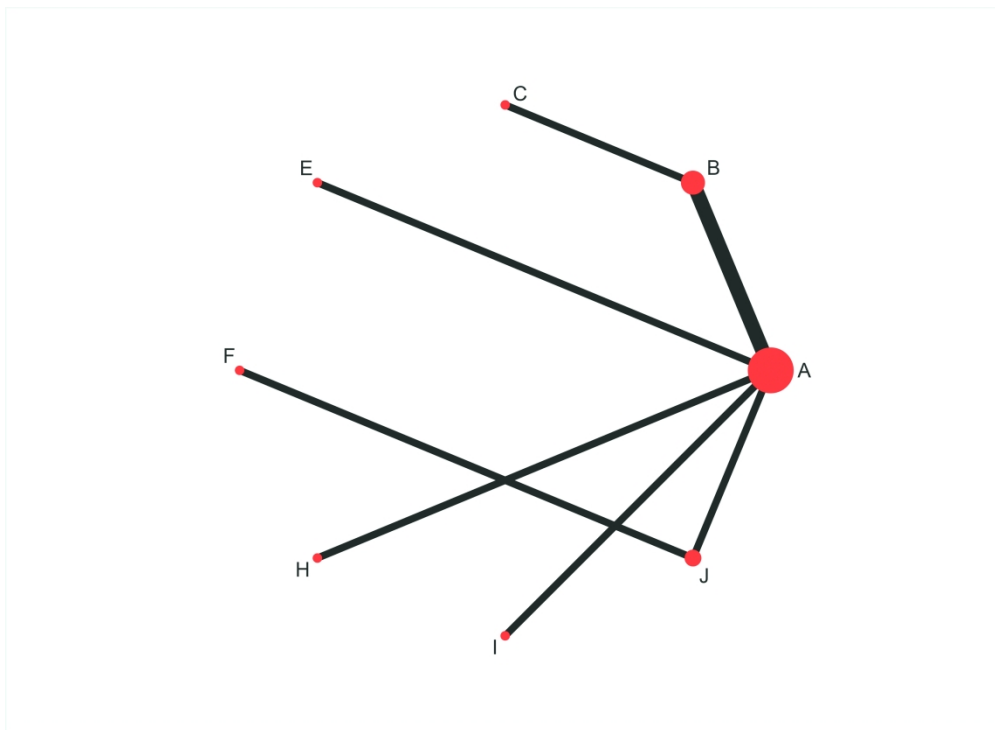

eFigure 2b

139x101mm (600 x 600 DPI)

1  
2  
3  
4  
5  
6  
7  
8  
9  
10  
11  
12  
13  
14  
15  
16  
17  
18  
19  
20  
21  
22  
23  
24  
25  
26  
27  
28  
29  
30  
31  
32  
33  
34  
35  
36  
37  
38  
39  
40  
41  
42  
43  
44  
45  
46  
47  
48  
49  
50  
51  
52  
53  
54  
55  
56  
57  
58  
59  
60

For peer review only

1  
2  
3  
4  
5  
6  
7  
8  
9  
10  
11  
12  
13  
14  
15  
16  
17  
18  
19  
20  
21  
22  
23  
24  
25  
26  
27  
28  
29  
30  
31  
32  
33  
34  
35  
36  
37  
38  
39  
40  
41  
42  
43  
44  
45  
46  
47  
48  
49  
50  
51  
52  
53  
54  
55  
56  
57  
58  
59  
60

For peer review only

1  
2  
3  
4  
5  
6  
7  
8  
9  
10  
11  
12  
13  
14  
15  
16  
17  
18  
19  
20  
21  
22  
23  
24  
25  
26  
27  
28  
29  
30  
31  
32  
33  
34  
35  
36  
37  
38  
39  
40  
41  
42  
43  
44  
45  
46  
47  
48  
49  
50  
51  
52  
53  
54  
55  
56  
57  
58  
59  
60

For peer review only

1  
2  
3  
4  
5  
6  
7  
8  
9  
10  
11  
12  
13  
14  
15  
16  
17  
18  
19  
20  
21  
22  
23  
24  
25  
26  
27  
28  
29  
30  
31  
32  
33  
34  
35  
36  
37  
38  
39  
40  
41  
42  
43  
44  
45  
46  
47  
48  
49  
50  
51  
52  
53  
54  
55  
56  
57  
58  
59  
60

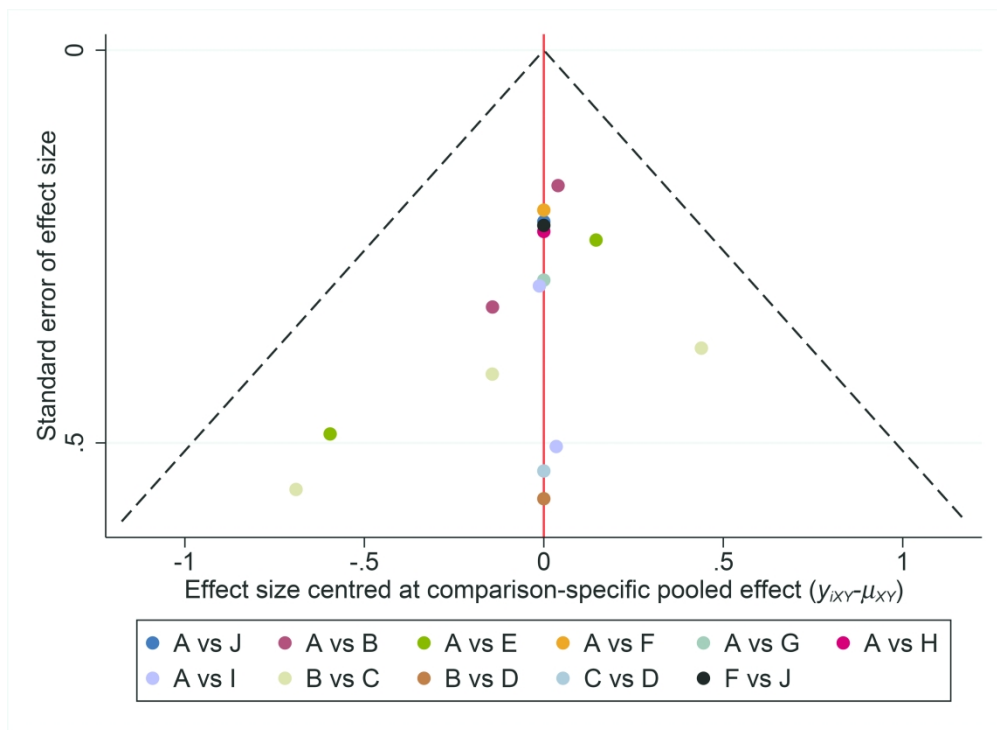

eFigure 4a

139x101mm (600 x 600 DPI)

1  
2  
3  
4  
5  
6  
7  
8  
9  
10  
11  
12  
13  
14  
15  
16  
17  
18  
19  
20  
21  
22  
23  
24  
25  
26  
27  
28  
29  
30  
31  
32  
33  
34  
35  
36  
37  
38  
39  
40  
41  
42  
43  
44  
45  
46  
47  
48  
49  
50  
51  
52  
53  
54  
55  
56  
57  
58  
59  
60

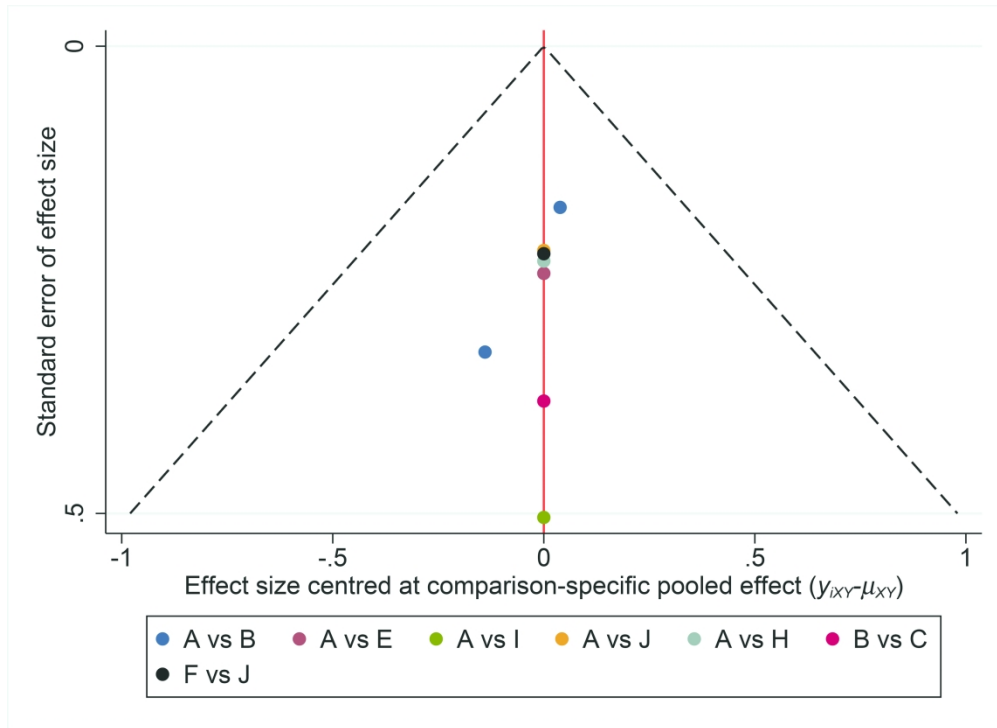

eFigure 4b

139x101mm (600 x 600 DPI)

1  
2  
3  
4  
5  
6  
7  
8  
9  
10  
11  
12  
13  
14  
15  
16  
17  
18  
19  
20  
21  
22  
23  
24  
25  
26  
27  
28  
29  
30  
31  
32  
33  
34  
35  
36  
37  
38  
39  
40  
41  
42  
43  
44  
45  
46  
47  
48  
49  
50  
51  
52  
53  
54  
55  
56  
57  
58  
59  
60

eFigure 5



1  
2  
3  
4  
5  
6  
7  
8  
9  
10  
11  
12  
13  
14  
15  
16  
17  
18  
19  
20  
21  
22  
23  
24  
25  
26  
27  
28  
29  
30  
31  
32  
33  
34  
35  
36  
37  
38  
39  
40  
41  
42  
43  
44  
45  
46  
47  
48  
49  
50  
51  
52  
53  
54  
55  
56  
57  
58  
59  
60

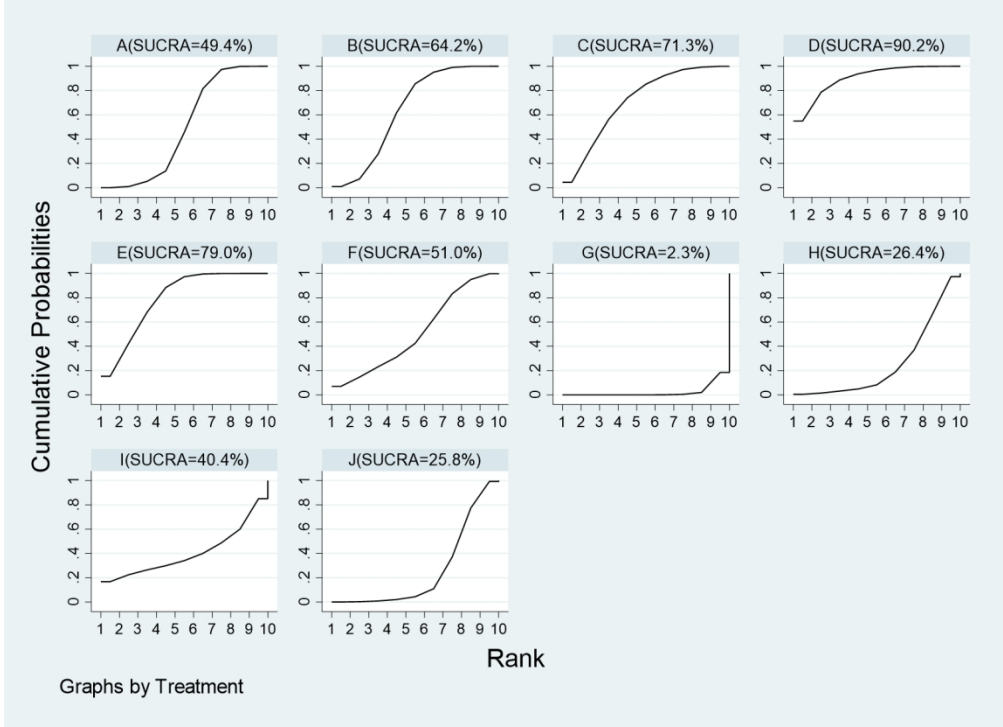

eFigure 6

349x254mm (120 x 120 DPI)

## Appendix

|                                                                                            |    |
|--------------------------------------------------------------------------------------------|----|
| Appendix 1 Search strategies.....                                                          | 2  |
| Appendix 2 Results of Inconsistency.....                                                   | 4  |
| Appendix 3 Network Diagram.....                                                            | 5  |
| Appendix 4 Conventional meta-analyses results.....                                         | 7  |
| Appendix 5 Comparison-adjusted funnel plot for each outcome from the network meta-analysis | 10 |
| Appendix 6 Table of GRADE .....                                                            | 11 |
| Appendix 7 Results of re-analysis.....                                                     | 15 |

## Appendix 1 Search strategies

### Search strategies for randomized controlled trials

#### Pubmed

1. (((((((("Osteoarthritis, Knee"[Mesh]) OR Knee Osteoarthritides[Title/Abstract]) OR Knee Osteoarthritis[Title/Abstract]) OR Osteoarthritis of Knee[Title/Abstract]) OR Osteoarthritis of the Knee[Title/Abstract]))) AND (((((((((((("Physical Therapy Modalities"[Mesh]) OR (Modalities, Physical Therapy[Title/Abstract]) OR (Modality, Physical Therapy[Title/Abstract]) OR (Physical Therapy Modality[Title/Abstract]) OR (Physiotherapy (Techniques)[Title/Abstract]) OR (Physiotherapies (Techniques)[Title/Abstract]) OR (Physical Therapy Techniques[Title/Abstract]) OR (Physical Therapy Technique[Title/Abstract]) OR (Techniques, Physical Therapy[Title/Abstract]) OR (Group Physiotherapy[Title/Abstract]) OR (Group Physiotherapies[Title/Abstract]) OR (Physiotherapies, Group[Title/Abstract]) OR (Physiotherapy, Group[Title/Abstract]) OR (Neurological Physiotherapy[Title/Abstract]) OR (Physiotherapy, Neurological[Title/Abstract]) OR (Neurophysiotherapy[Title/Abstract]))))))))))
2. (((((((("Osteoarthritis, Knee"[Mesh]) OR Knee Osteoarthritides[Title/Abstract]) OR Knee Osteoarthritis[Title/Abstract]) OR Osteoarthritis of Knee[Title/Abstract]) OR Osteoarthritis of the Knee[Title/Abstract]))) AND (((("Orthopedic Equipment"[Mesh]) OR (Equipment, Orthopedic[Title/Abstract]) OR (Equipments, Orthopedic[Title/Abstract]) OR (Orthopedic Equipments[Title/Abstract]))))

#### Embase

1. ('physiotherapy'/exp OR 'physical therapy':ab,ti OR 'physical therapy (speciality)':ab,ti OR 'physical therapy (specialty)':ab,ti OR 'physical therapy modalities ':ab,ti OR 'physical therapy service':ab,ti OR 'physical therapy speciality':ab,ti OR 'physical therapy specialty ':ab,ti OR 'physical treatment':ab,ti OR ' physio therapy ':ab,ti OR 'physical therapy techniques':ab,ti OR 'physical treatment':ab,ti OR 'physiotherapy department':ab,ti OR 'therapy, physical':ab,ti) AND ('knee osteoarthritis'/exp OR 'arthrosis, knee':ab,ti OR 'femorotibial arthrosis':ab,ti OR 'gonarthrosis':ab,ti OR 'knee arthrosis':ab,ti OR 'knee joint arthrosis':ab,ti OR 'knee joint osteoarthritis':ab,ti OR 'knee osteo-arthritis':ab,ti OR 'knee osteo-arthritis':ab,ti OR 'knee osteoarthrosis':ab,ti OR 'osteoarthritis, knee':ab,ti OR 'osteoarthrosis, knee':ab,ti)
2. ('orthosis'/exp OR 'device, orthotic':ab,ti OR 'devices, orthotic':ab,ti OR 'orthesis':ab,ti OR 'orthoepadic support device':ab,ti OR 'orthopedic support device':ab,ti OR 'orthoses':ab,ti OR 'orthotic device (physical object)':ab,ti OR 'orthotic devices':ab,ti) AND ('knee osteoarthritis'/exp OR 'arthrosis, knee':ab,ti OR 'femorotibial arthrosis':ab,ti OR 'gonarthrosis':ab,ti OR 'knee arthrosis':ab,ti OR 'knee joint arthrosis':ab,ti OR 'knee joint osteoarthritis':ab,ti OR 'knee osteo-arthritis':ab,ti OR 'knee osteo-arthritis':ab,ti OR 'knee

osteoarthritis':ab,ti OR 'osteoarthritis, knee':ab,ti OR 'osteoarthritis, knee':ab,ti)

### Web of Science

1. AB=(physical therapy OR physiotherapy OR physio therapy OR physical treatment OR physiotherapy department OR physical therapy techniques)
2. TI=(physical therapy OR physiotherapy OR physio therapy OR physical treatment OR physiotherapy department OR physical therapy techniques)
3. AB=(orthosis OR device OR orthosis OR orthoses OR orthopedic support device OR orthotic device)
4. TI=(orthosis OR device OR orthosis OR orthoses OR orthopedic support device OR orthotic device)
5. #4 OR #3 OR #2 OR #1
6. AB=(knee osteoarthritis OR femorotibial arthrosis OR gonarthrosis OR knee arthrosis OR knee osteo-arthritis OR knee osteoarthritis OR osteoarthritis)
7. TI=(knee osteoarthritis OR femorotibial arthrosis OR gonarthrosis OR knee arthrosis OR knee osteo-arthritis OR knee osteoarthritis OR osteoarthritis)
8. #6 OR #7
9. #8 AND #5

### Cochrane Library

1. (MeSH descriptor: [Physical Therapy Modalities] explode all trees OR (Neurological Physiotherapy):ti,ab,kw OR (Physiotherapy, Neurological):ti,ab,kw OR (Neurophysiotherapy):ti,ab,kw OR (Techniques, Physical Therapy):ti,ab,kw OR (Physiotherapies (Techniques)):ti,ab,kw OR (Physical Therapy Techniques):ti,ab,kw OR (Physiotherapy (Techniques)):ti,ab,kw OR (Modality, Physical Therapy):ti,ab,kw OR (Physical Therapy Modality):ti,ab,kw OR (Physical Therapy Technique):ti,ab,kw OR (Modalities, Physical Therapy):ti,ab,kw OR (Group Physiotherapies):ti,ab,kw OR (Physiotherapy, Group):ti,ab,kw OR (Group Physiotherapy):ti,ab,kw OR (Physiotherapies, Group):ti,ab,kw) AND ((Osteoarthritis of Knee):ti,ab,kw OR (Knee Osteoarthritis):ti,ab,kw OR (Knee Osteoarthritis):ti,ab,kw OR (Osteoarthritis of the Knee):ti,ab,kw) OR MeSH descriptor: [Osteoarthritis, Knee] explode all trees)
2. (MeSH descriptor: [Orthopedic Equipment] explode all trees OR (Orthopedic Equipments):ti,ab,kw OR (Equipment, Orthopedic):ti,ab,kw OR (Equipments, Orthopedic):ti,ab,kw) AND ((Osteoarthritis of Knee):ti,ab,kw OR (Knee Osteoarthritis):ti,ab,kw OR (Knee Osteoarthritis):ti,ab,kw OR (Osteoarthritis of the Knee):ti,ab,kw) OR MeSH descriptor: [Osteoarthritis, Knee] explode all trees)

### MEDLINE

1. (knee osteoarthritis) OR (femorotibial arthrosis) OR (gonarthrosis) OR (knee arthrosis) OR (knee osteo-arthritis) OR (knee osteoarthritis) OR (osteoarthritis)
2. (physical therapy) OR (physiotherapy) OR (physio therapy) OR (physical treatment) OR (physiotherapy department) OR (physical therapy techniques)
3. (orthotic devices) OR (Orthopedic Equipment) OR (orthosis) OR (device) OR (orthosis)

- 1  
2  
3 OR (orthoses) OR (orthopaedic support device)  
4 4. #2 OR #3  
5 5. #1 AND #4  
6  
7  
8  
9

## Appendix 2 Results of Inconsistency

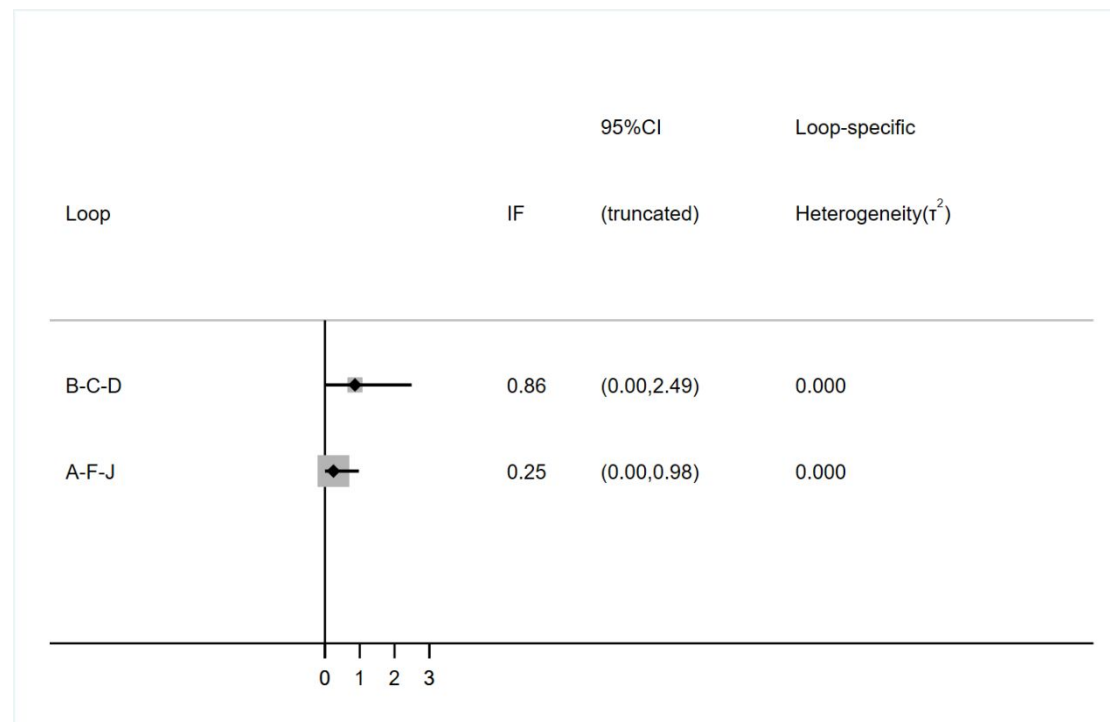

eFigure 1. Inconsistency for triangular loops in First peak KAM.

## Appendix 3 Network Diagram

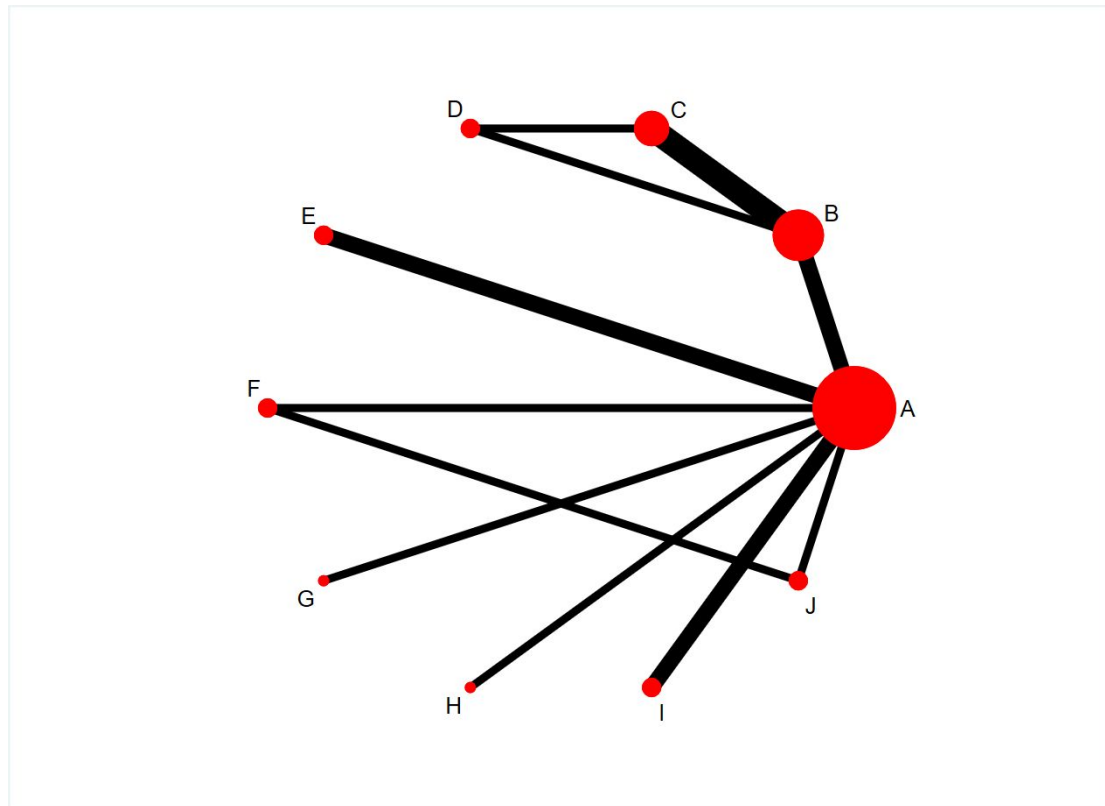

Figure 2a. Structure of network formed by interventions and their direct comparisons (First peak KAM). A= Standard care; B= Lateral Wedge Insole; C= Knee Brace; D= Lateral Wedge Insole+ Knee Brace; E= Gait retraining; F= Quadriceps strengthening; G= Variable-stiffness shoe; H= Hip strengthening; I= Lower limb exercise; J= Neuromuscular exercise.

**Footnote:** Width of the lines is proportional to the number of trials comparing every pair of treatments. Size of every circle is proportional to the number of randomly assigned participants (ie, sample size).

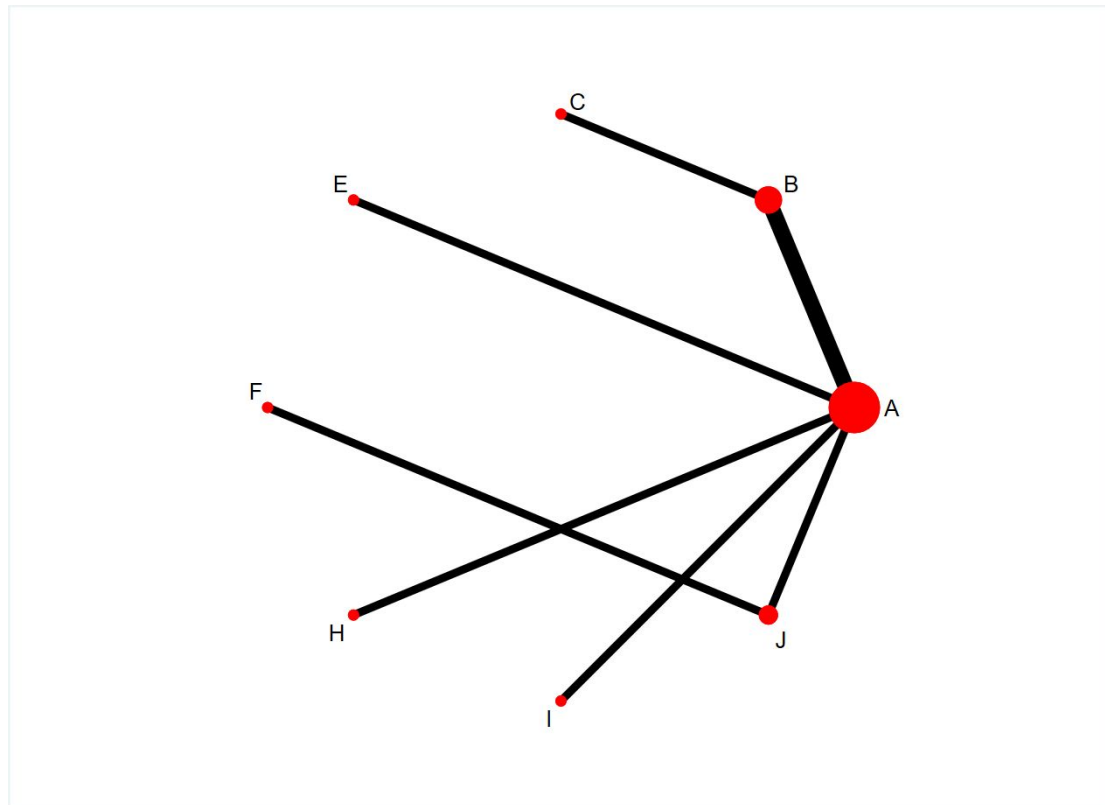

eFigure 2b. Structure of network formed by interventions and their direct comparisons (KAAI). A= Standard care; B= Lateral Wedge Insole; C= Knee Brace; E= Gait retraining; F= Quadriceps strengthening; H= Hip strengthening; I= Lower limb exercise; J= Neuromuscular exercise.

**Footnote:** Width of the lines is proportional to the number of trials comparing every pair of treatments. Size of every circle is proportional to the number of randomly assigned participants (ie, sample size).

## Appendix 4 Conventional meta-analyses results

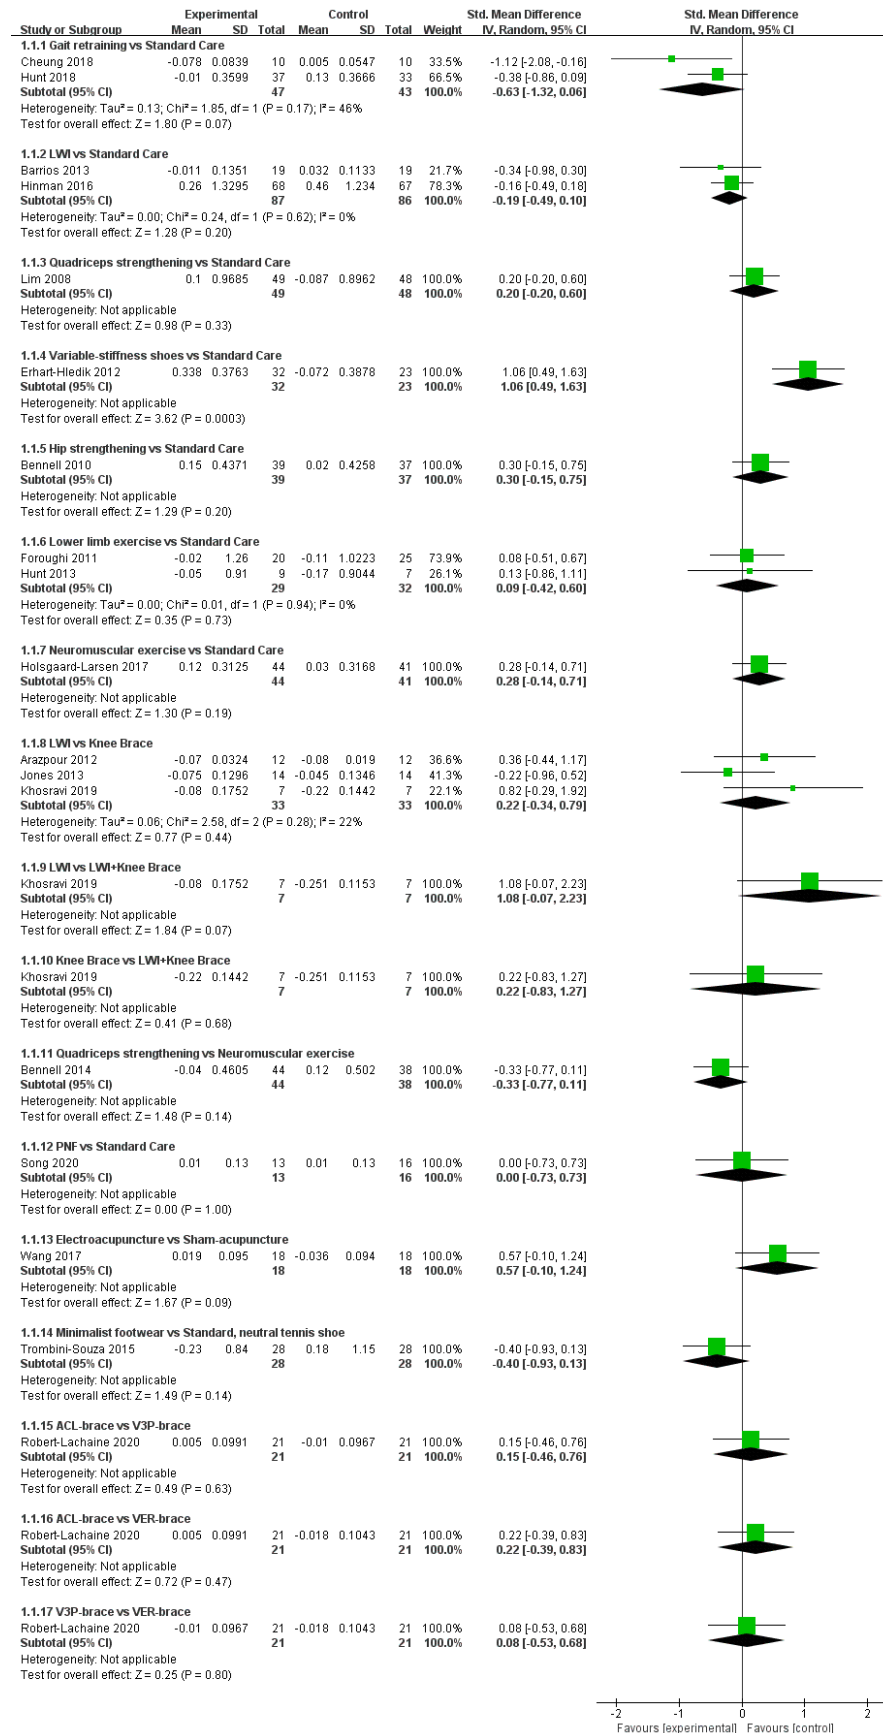



eFigure 3a. Conventional meta-analysis of treatment effects on First peak KAM.

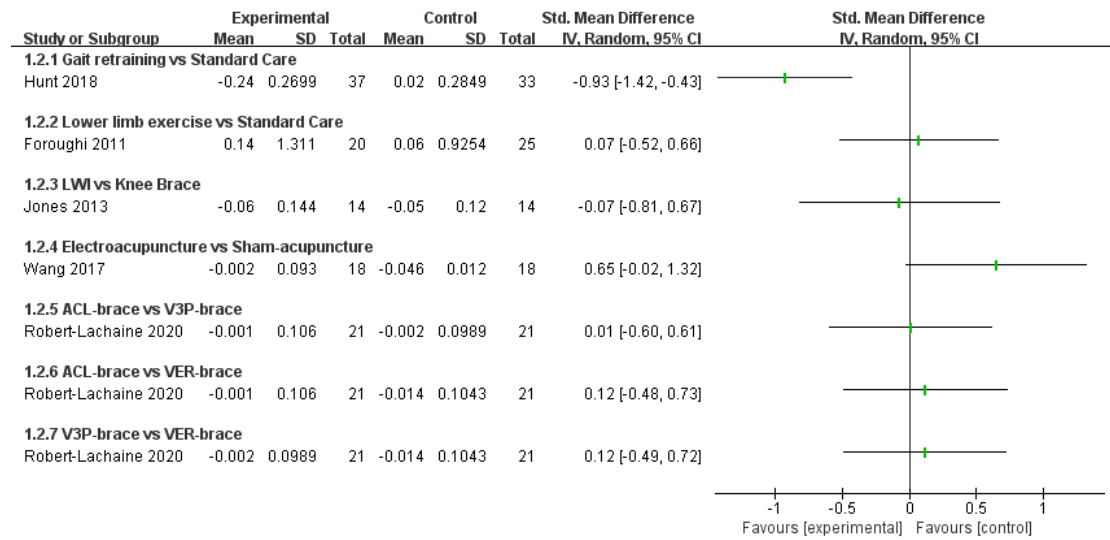

eFigure 3b. Conventional meta-analysis of treatment effects on Second peak KAM.

Peer review only

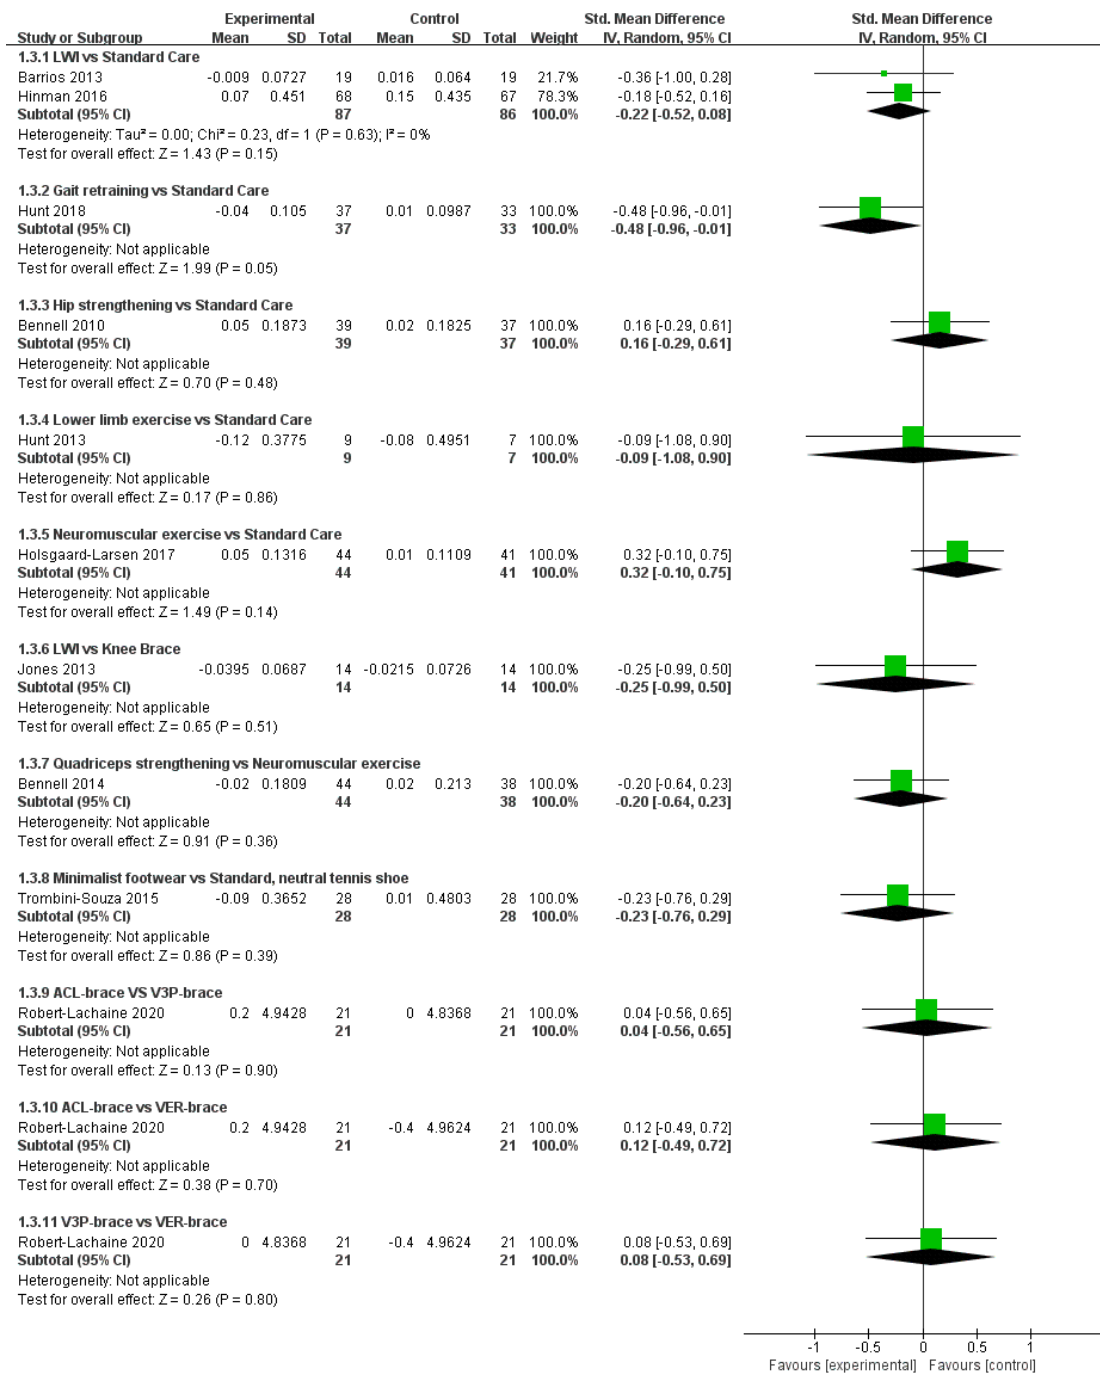

Figure 3c. Conventional meta-analysis of treatment effects on KAAI.

## Appendix 5 Comparison-adjusted funnel plot for each outcome from the network meta-analysis

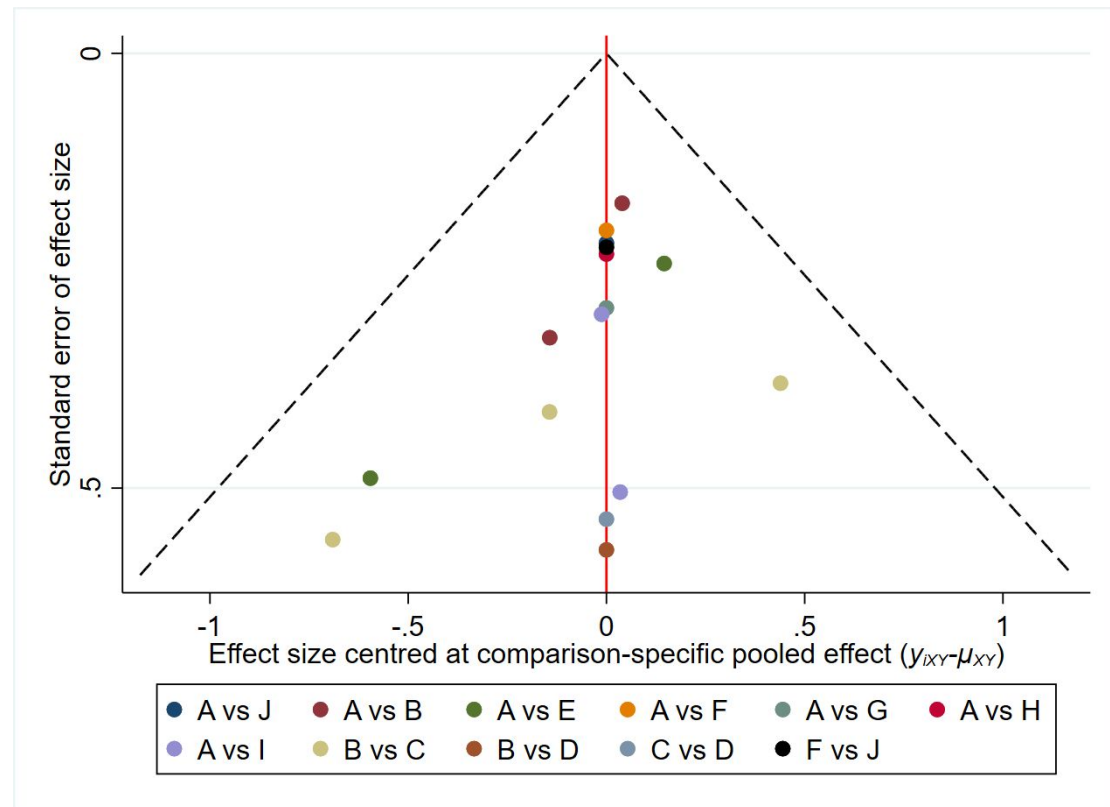

eFigure 4a. Comparison-adjusted funnel plot for First peak KAM.

A= Standard care; B= Lateral Wedge Insole; C= Knee Brace; D= Lateral Wedge Insole+ Knee Brace; E= Gait retraining; F= Quadriceps strengthening; G= Variable-stiffness shoe; H= Hip strengthening; I= Lower limb exercise; J= Neuromuscular exercise.

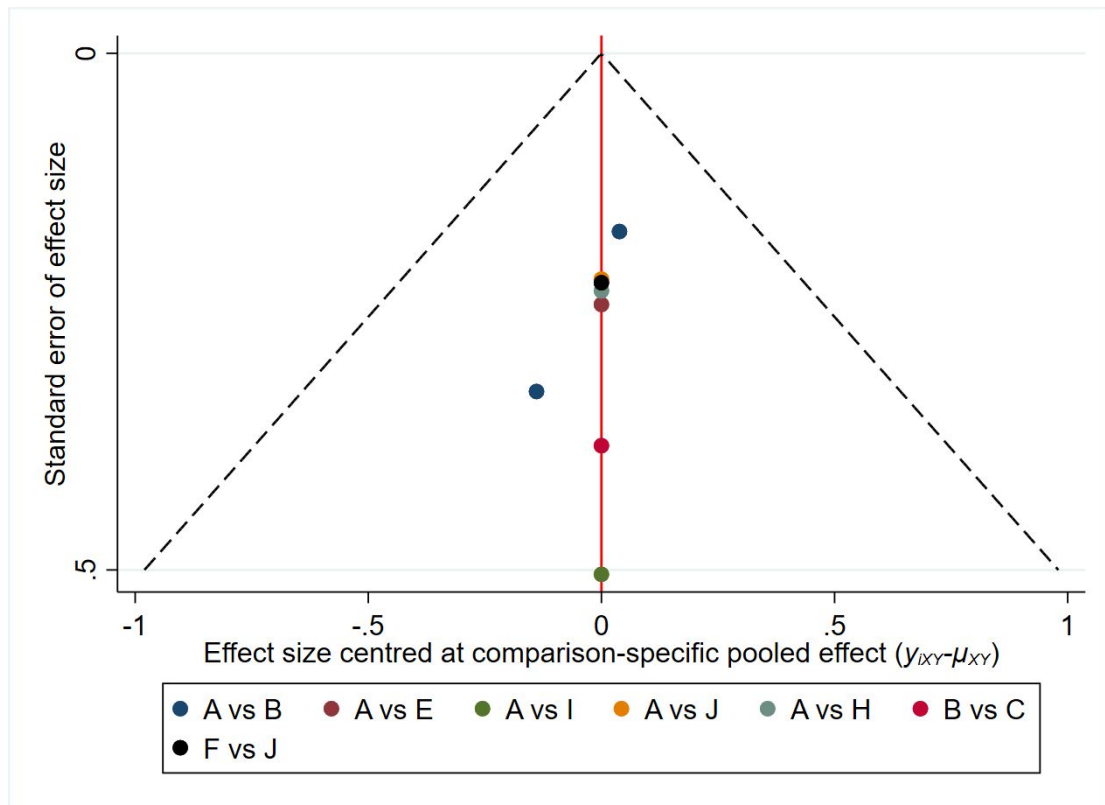

eFigure 4b. Comparison-adjusted funnel plot for KAAI.

A= Standard care; B= Lateral Wedge Insole; C= Knee Brace; E= Gait retraining; F= Quadriceps strengthening; H= Hip strengthening; I= Lower limb exercise; J= Neuromuscular exercise.

## Appendix 6 Table of GRADE

Based on all the above information, we GRADEd each network estimate according to the following criteria:

- 1) Study limitations: We downgraded by one level when the contributions from low RoB comparisons were less than 30% and contributions from moderate RoB comparisons were 70% or greater. And we downgraded by two level when the contributions from low RoB comparisons were more than 30%.
- 2) Imprecision: We considered a clinically meaningful threshold for CI to be 0 and did not downgrade the estimate if the upper limit is below 0; or if the lower limit is above 0.
- 3) Inconsistency: We rated two concepts, heterogeneity and incoherence (inconsistency), in this domain. For heterogeneity, we did not downgrade any network estimate for heterogeneity, because we looked at the common tau and found that it is low. For

inconsistency, we looked at the results of inconsistency (Appendix 2), where we have not downgraded for imprecision.

- 4) Indirectness: We have assured transitivity in our network by limiting the included studies to patients with knee osteoarthritis. Evaluation of transitivity for singly-connected nodes is unclear, so we downgraded such nodes for indirectness.
- 5) Publication bias: The comparison-adjusted funnel plot (Appendix 5) did not suggest presence of overall publication bias. We managed to retrieve supplementary and unpublished information included in the available systematic reviews and network meta-analyses, and we are confident that we have all available information that is possible to capture from clinical trial registries. Although we cannot completely rule out the possibility that some research is still missing, we still believe that the project does not need to be downgraded.

| Comparison                                     | Nature of the Evidence | GRADE    | Downgrading due to                           |
|------------------------------------------------|------------------------|----------|----------------------------------------------|
| <b>AB:</b> Placebo vs LWI                      | Mixed                  | LOW      | Study limitations; Imprecision               |
| <b>AC:</b> Placebo vs Knee Brace               | Indirect               | LOW      | Study limitations; Imprecision               |
| <b>AD:</b> Placebo vs LWI+Knee Brace           | Indirect               | LOW      | Study limitations; Imprecision               |
| <b>AE:</b> Placebo vs Gait Retraining          | Mixed                  | VERY LOW | Study limitations; Indirectness              |
| <b>AF:</b> Placebo vs Quadriceps Strengthening | Mixed                  | VERY LOW | Study limitations; Imprecision               |
| <b>AG:</b> Placebo vs Variable-Stiffness Shoes | Mixed                  | VERY LOW | Study limitations; Indirectness; Imprecision |
| <b>AH:</b> Placebo vs Hip Strengthening        | Mixed                  | VERY LOW | Study limitations; Indirectness; Imprecision |
| <b>AI:</b> Placebo vs Lower Limb Exercise      | Mixed                  | VERY LOW | Study limitations; Indirectness; Imprecision |
| <b>AJ:</b> Placebo vs Neuromuscular Exercise   | Mixed                  | MODERATE | Study limitations                            |
| <b>BC:</b> LWI vs Knee Brace                   | Mixed                  | VERY LOW | Study limitations; Imprecision               |
| <b>BD:</b> LWI vs LWI+Knee Brace               | Mixed                  | VERY LOW | Study limitations; Imprecision               |

|                                                       |          |          |                                                 |
|-------------------------------------------------------|----------|----------|-------------------------------------------------|
| <b>BE:</b> LWI vs Gait Retraining                     | Indirect | VERY LOW | Study limitations; Indirectness;<br>Imprecision |
| <b>BF:</b> LWI vs Quadriceps Strengthening            | Indirect | LOW      | Study limitations; Imprecision                  |
| <b>BG:</b> LWI vs Variable-Stiffness Shoes            | Indirect | LOW      | Study limitations; Indirectness                 |
| <b>BH:</b> LWI vs Hip Strengthening                   | Indirect | VERY LOW | Study limitations; Indirectness;<br>Imprecision |
| <b>BI:</b> LWI vs Lower Limb Exercise                 | Indirect | VERY LOW | Study limitations; Indirectness;<br>Imprecision |
| <b>BJ:</b> LWI vs Neuromuscular Exercise              | Indirect | MODERATE | Study limitations                               |
| <b>CD:</b> Knee Brace vs LWI+Knee Brace               | Mixed    | VERY LOW | Study limitations; Imprecision                  |
| <b>CE:</b> Knee Brace vs Gait Retraining              | Indirect | VERY LOW | Study limitations; Indirectness;<br>Imprecision |
| <b>CF:</b> Knee Brace vs Quadriceps Strengthening     | Indirect | LOW      | Study limitations; Imprecision                  |
| <b>CG:</b> Knee Brace vs Variable-Stiffness Shoes     | Indirect | LOW      | Study limitations; Indirectness                 |
| <b>CH:</b> Knee Brace vs Hip Strengthening            | Indirect | VERY LOW | Study limitations; Indirectness;<br>Imprecision |
| <b>CI:</b> Knee Brace vs Lower Limb Exercise          | Indirect | VERY LOW | Study limitations; Indirectness;<br>Imprecision |
| <b>CJ:</b> Knee Brace vs Neuromuscular Exercise       | Indirect | MODERATE | Study limitations                               |
| <b>DE:</b> LWI+Knee Brace vs Gait Retraining          | Indirect | VERY LOW | Study limitations; Indirectness;<br>Imprecision |
| <b>DF:</b> LWI+Knee Brace vs Quadriceps Strengthening | Indirect | LOW      | Study limitations; Imprecision                  |
| <b>DG:</b> LWI+Knee Brace vs Variable-Stiffness Shoes | Indirect | VERY LOW | Study limitations; Indirectness                 |
| <b>DH:</b> LWI+Knee Brace vs Hip                      | Indirect | LOW      | Study limitations; Indirectness                 |

## Strengthening

**DI:** LWI+Knee Brace vs Lower Limb Exercise Indirect VERY LOW Study limitations; Indirectness; Imprecision

**DJ:** LWI+Knee Brace vs Neuromuscular Exercise Indirect MODERATE Study limitations

**EF:** Gait Retraining vs Quadriceps Strengthening Indirect VERY LOW Study limitations; Indirectness

**EG:** Gait Retraining vs Variable-Stiffness Shoes Indirect VERY LOW Study limitations; Indirectness

**EH:** Gait Retraining vs Hip Strengthening Indirect LOW Study limitations; Indirectness

**EI:** Gait Retraining vs Lower limb Exercise Indirect VERY LOW Study limitations; Indirectness; Imprecision

**EJ:** Gait Retraining vs Neuromuscular Exercise Indirect LOW Study limitations; Indirectness

**FG:** Quadriceps Strengthening vs Variable-Stiffness Shoes Indirect VERY LOW Study limitations; Indirectness

**FH:** Quadriceps Strengthening vs Hip Strengthening Indirect VERY LOW Study limitations; Indirectness; Imprecision

**FI:** Quadriceps Strengthening vs Lower Limb Exercise Indirect VERY LOW Study limitations; Indirectness; Imprecision

**FJ:** Quadriceps Strengthening vs Neuromuscular Exercise Mixed LOW Study limitations; Imprecision

**GH:** Variable-Stiffness Shoes vs Hip Strengthening Indirect LOW Study limitations; Indirectness

**GI:** Variable-Stiffness Shoes vs Lower Limb Exercise Indirect VERY LOW Study limitations; Indirectness

**GJ:** Variable-Stiffness Shoes vs Neuromuscular Exercise Indirect LOW Study limitations; Indirectness

|                                                          |          |          |                                              |
|----------------------------------------------------------|----------|----------|----------------------------------------------|
| <b>HI:</b> Hip Strengthening vs Lower Limb Exercise      | Indirect | VERY LOW | Study limitations; Indirectness; Imprecision |
| <b>HJ:</b> Hip Strengthening vs Neuromuscular Exercise   | Indirect | VERY LOW | Study limitations; Indirectness; Imprecision |
| <b>IJ:</b> Lower Limb Exercise vs Neuromuscular Exercise | Indirect | VERY LOW | Study limitations; Indirectness; Imprecision |

### Appendix 7 Results of re-analysis

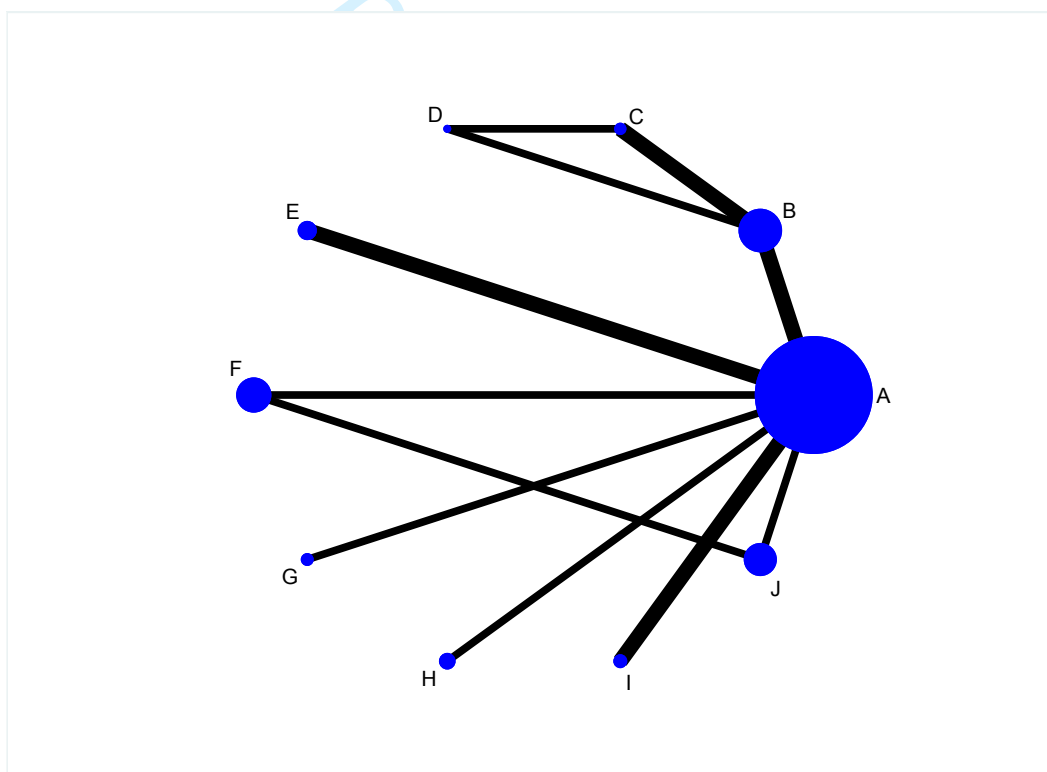

eFigure 5. Structure of network formed by interventions and their direct comparisons on First peak KAM (re-analysis). A= Standard care; B= Lateral Wedge Insole; C= Knee Brace; D= Lateral Wedge Insole+ Knee Brace; E= Gait retraining; F= Quadriceps strengthening; G= Variable-stiffness shoe; H= Hip strengthening; I= Lower limb exercise; J= Neuromuscular exercise.



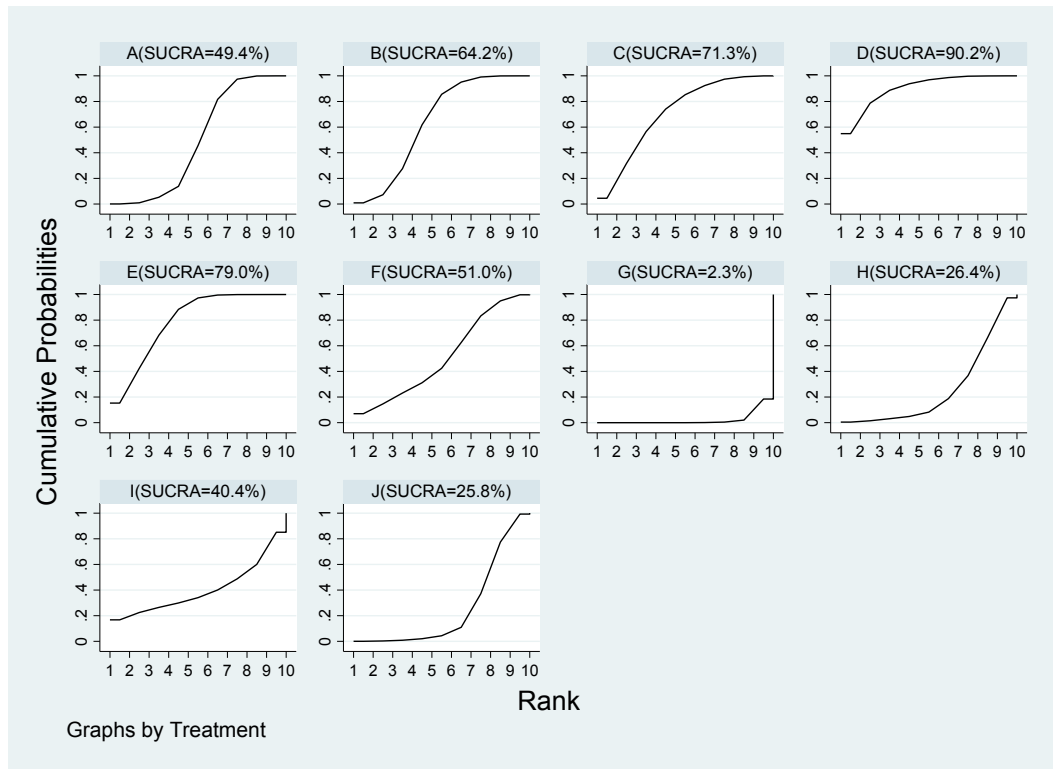

eFigure 6. Rankings for effects on First peak KAM (re-analysis). Graph displays distribution of probabilities for each treatment. X-axis represents the possible rank of each treatment (from the best to worst according to the outcomes), Y-axis represents the cumulative probability for each treatment to be the best option, among the best two options, among the best three options, and so on. A= Standard care; B= Lateral Wedge Insole; C= Knee Brace; D= Lateral Wedge Insole+ Knee Brace; E= Gait retraining; F= Quadriceps strengthening; G= Variable-stiffness shoe; H= Hip strengthening; I= Lower limb exercise; J= Neuromuscular exercise.

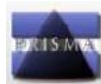

# PRISMA 2009 Checklist

| Section/Topic             | #  | Checklist Item                                                                                                                                                                                                                                                                                              | Reported on Page #                                            |
|---------------------------|----|-------------------------------------------------------------------------------------------------------------------------------------------------------------------------------------------------------------------------------------------------------------------------------------------------------------|---------------------------------------------------------------|
| <b>TITLE</b>              |    |                                                                                                                                                                                                                                                                                                             |                                                               |
| Title                     | 1  | Identify the report as a systematic review, meta-analysis, or both.                                                                                                                                                                                                                                         | Title page                                                    |
| <b>ABSTRACT</b>           |    |                                                                                                                                                                                                                                                                                                             |                                                               |
| Structured summary        | 2  | Provide a structured summary including, as applicable: background; objectives; data sources; study eligibility criteria, participants, and interventions; study appraisal and synthesis methods; results; limitations; conclusions and implications of key findings; systematic review registration number. | Abstract                                                      |
| <b>INTRODUCTION</b>       |    |                                                                                                                                                                                                                                                                                                             |                                                               |
| Rationale                 | 3  | Describe the rationale for the review in the context of what is already known.                                                                                                                                                                                                                              | Introduction, paragraph 1-4                                   |
| Objectives                | 4  | Provide an explicit statement of questions being addressed with reference to participants, interventions, comparisons, outcomes, and study design (PICOS).                                                                                                                                                  | Introduction, paragraph 5                                     |
| <b>METHODS</b>            |    |                                                                                                                                                                                                                                                                                                             |                                                               |
| Protocol and registration | 5  | Indicate if a review protocol exists, if and where it can be accessed (e.g., Web address), and, if available, provide registration information including registration number.                                                                                                                               | METHODS, paragraph 1                                          |
| Eligibility criteria      | 6  | Specify study characteristics (e.g., PICOS, length of follow-up) and report characteristics (e.g., years considered, language, publication status) used as criteria for eligibility, giving rationale.                                                                                                      | METHODS, Identification and selection of studies              |
| Information sources       | 7  | Describe all information sources (e.g., databases with dates of coverage, contact with study authors to identify additional studies) in the search and date last searched.                                                                                                                                  | METHODS, Identification and selection of studies, paragraph 1 |
| Search                    | 8  | Present full electronic search strategy for at least one database, including any limits used, such that it could be repeated.                                                                                                                                                                               | Appendix 1 Search strategies                                  |
| Study selection           | 9  | State the process for selecting studies (i.e., screening, eligibility, included in systematic review, and, if applicable, included in the meta-analysis).                                                                                                                                                   | Results, figure 1                                             |
| Data collection process   | 10 | Describe method of data extraction from reports (e.g., piloted forms, independently, in duplicate) and any processes for obtaining and confirming data from investigators.                                                                                                                                  | METHODS, Identification                                       |

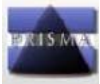

# PRISMA 2009 Checklist

1  
2  
3  
4  
5  
6  
7  
8  
9  
10  
11  
12  
13  
14  
15  
16  
17  
18  
19  
20  
21  
22  
23  
24  
25  
26  
27  
28  
29  
30  
31  
32  
33  
34  
35  
36  
37  
38  
39  
40  
41  
42  
43  
44  
45  
46  
47

|                                    |    |                                                                                                                                                                                                                        |                                                                                                           |
|------------------------------------|----|------------------------------------------------------------------------------------------------------------------------------------------------------------------------------------------------------------------------|-----------------------------------------------------------------------------------------------------------|
|                                    |    |                                                                                                                                                                                                                        | and selection of studies, paragraph 2                                                                     |
| Data items                         | 11 | List and define all variables for which data were sought (e.g., PICOS, funding sources) and any assumptions and simplifications made.                                                                                  | METHODS, Identification and selection of studies, paragraph 2, 3 & Data Collection and Quality assessment |
| Risk of bias in individual studies | 12 | Describe methods used for assessing risk of bias of individual studies (including specification of whether this was done at the study or outcome level), and how this information is to be used in any data synthesis. | METHODS, Assessment of characteristics of studies & Results, Figure 4                                     |
| Summary measures                   | 13 | State the principal summary measures (e.g., risk ratio, difference in means).                                                                                                                                          | METHODS, Statistical analysis                                                                             |
| Synthesis of results               | 14 | Describe the methods of handling data and combining results of studies, if done, including measures of consistency (e.g., I <sup>2</sup> ) for each meta-analysis.                                                     | METHODS, Statistical analysis                                                                             |

| Section/Topic               | #  | Checklist Item                                                                                                                                                                                                                                                                         | Reported on Page #                                |
|-----------------------------|----|----------------------------------------------------------------------------------------------------------------------------------------------------------------------------------------------------------------------------------------------------------------------------------------|---------------------------------------------------|
| Risk of bias across studies | 15 | Specify any assessment of risk of bias that may affect the cumulative evidence (e.g., publication bias, selective reporting within studies).                                                                                                                                           | METHODS, Assessment of characteristics of studies |
| Additional analyses         | 16 | Describe methods of additional analyses (e.g., sensitivity or subgroup analyses, meta-regression), if done, indicating which were pre-specified.<br><small><a href="http://bmjopen.bmj.com/site/about/guidelines.xhtml">http://bmjopen.bmj.com/site/about/guidelines.xhtml</a></small> | METHODS, Statistical                              |

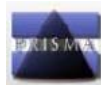

# PRISMA 2009 Checklist

1  
2  
3  
4  
5  
6  
7  
8  
9  
10  
11  
12  
13  
14  
15  
16  
17  
18  
19  
20  
21  
22  
23  
24  
25  
26  
27  
28  
29  
30  
31  
32  
33  
34  
35  
36  
37  
38  
39  
40  
41  
42  
43  
44  
45  
46  
47

|                               |    |                                                                                                                                                                                                                                                                                                                                    | Analysis                                                  |
|-------------------------------|----|------------------------------------------------------------------------------------------------------------------------------------------------------------------------------------------------------------------------------------------------------------------------------------------------------------------------------------|-----------------------------------------------------------|
| <b>RESULTS</b>                |    |                                                                                                                                                                                                                                                                                                                                    |                                                           |
| Study selection               | 17 | Give numbers of studies screened, assessed for eligibility, and included in the review, with reasons for exclusions at each stage, ideally with a flow diagram.                                                                                                                                                                    | Results, Characteristics of included studies & Figure 1   |
| Study characteristics         | 18 | For each study, present characteristics for which data were extracted (e.g., study size, PICOS, follow-up period) and provide the citations.                                                                                                                                                                                       | Results, Characteristics of included studies & Table 1, 2 |
| Risk of bias within studies   | 19 | Present data on risk of bias of each study and, if available, any outcome level assessment (see item 12).                                                                                                                                                                                                                          | Results, Risk of bias & Figure 4                          |
| Results of individual studies | 20 | For all outcomes considered (benefits or harms), present, for each study: (a) simple summary data for each intervention group (b) effect estimates and confidence intervals, ideally with a forest plot.                                                                                                                           | Results, KAM & KAAI & Appendix 4                          |
| Synthesis of results          | 21 | Present the main results of the review. If meta-analyses done, include for each, confidence intervals and measures of consistency.                                                                                                                                                                                                 | Results, KAM & KAAI (Table 3 & Figure 2, 3)               |
| Risk of bias across studies   | 22 | Present results of any assessment of risk of bias across studies (see Item 15).                                                                                                                                                                                                                                                    | Results, Risk of bias & Appendix 5 & 6                    |
| Additional analysis           | 23 | Give results of additional analyses, if done (e.g., sensitivity or subgroup analyses, meta-regression [see Item 16]).                                                                                                                                                                                                              | Appendix 2 & 5 & 6                                        |
| <b>DISCUSSION</b>             |    |                                                                                                                                                                                                                                                                                                                                    |                                                           |
| Summary of evidence           | 24 | Summarize the main findings including the strength of evidence for each main outcome; consider their relevance to key groups (e.g., healthcare providers, users, and policy makers).<br>For peer review only - <a href="http://bmjopen.bmj.com/site/about/guidelines.xhtml">http://bmjopen.bmj.com/site/about/guidelines.xhtml</a> | Discussion, paragraph 1 & Conclusion                      |

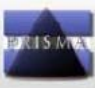

# PRISMA 2009 Checklist

1  
2  
3  
4  
5  
6  
7  
8  
9  
10  
11  
12  
13  
14  
15  
16  
17  
18  
19  
20  
21  
22  
23  
24  
25  
26  
27  
28  
29  
30  
31  
32  
33  
34  
35  
36  
37  
38  
39  
40  
41  
42  
43  
44  
45  
46  
47

|                |    |                                                                                                                                                               |                                          |
|----------------|----|---------------------------------------------------------------------------------------------------------------------------------------------------------------|------------------------------------------|
| Limitations    | 25 | Discuss limitations at study and outcome level (e.g., risk of bias), and at review-level (e.g., incomplete retrieval of identified research, reporting bias). | Discussion, paragraph 4                  |
| Conclusions    | 26 | Provide a general interpretation of the results in the context of other evidence, and implications for future research.                                       | Conclusion & Discussion, paragraph 8 & 9 |
| <b>FUNDING</b> |    |                                                                                                                                                               |                                          |
| Funding        | 27 | Describe sources of funding for the systematic review and other support (e.g., supply of data); role of funders for the systematic review.                    | Funding                                  |

From: Moher D, Liberati A, Tetzlaff J, Altman DG, The PRISMA Group (2009). Preferred Reporting Items for Systematic Reviews and Meta-Analyses: The PRISMA Statement. PLoS Med 6(6): e1000097. doi:10.1371/journal.pmed1000097

For more information, visit: [www.prisma-statement.org](http://www.prisma-statement.org).

1  
2  
3  
4 **Dear Editors,**  
5

6 We would like to submit the enclosed Original Article entitled “Non-surgical  
7  
8  
9 Treatment-induced Reduction in the Biomechanical Risk Factors Related to Knee  
10  
11  
12 Osteoarthritis: A systematic review and Bayesian network meta-analysis of randomized  
13  
14 controlled trials”, which we wish to be considered for publication in “*BMJ Open*”.

15  
16  
17 No conflict of interest exists in the submission of this manuscript, and manuscript is  
18  
19 approved by all authors for publication. All authors contributed to the creation of this  
20  
21 manuscript for important intellectual content. I would like to declare on behalf of my  
22  
23 co-authors that the work described was original research that has not been published  
24  
25 previously, and not under consideration for publication elsewhere, in whole or in part.  
26  
27

28  
29 All the authors listed have approved the manuscript that is enclosed.  
30  
31

32 This study aims to evaluate the effects of non-surgical treatment in reducing the  
33  
34 biomechanical risk factors related to knee osteoarthritis (KOA) and this Bayesian  
35  
36 network meta-analysis is the first review on effect of physical therapy on the  
37  
38 biomechanical parameters (KAM & KAAI) of the knee OA. The review observes a null  
39  
40 statistical reduction in KAM and KAAI for most therapies, using these non-surgical  
41  
42 treatments clinically could improve symptoms and physical activity level without  
43  
44 increasing the biomechanical magnitude; thus, improving the quality of life of patients  
45  
46 with KOA. I hope this paper is suitable for “*BMJ Open*”.  
47  
48  
49  
50  
51

52  
53 We deeply appreciate your consideration of our manuscript, and we look forward to  
54  
55 receiving comments from the reviewers. If you have any queries, please don't hesitate  
56  
57 to contact me at the address below.  
58  
59  
60

1  
2  
3  
4 Thank you and best regards.  
5

6 Jia-Kuo Yu, MD&PhD, is the corresponding author and his address and other  
7  
8 information is as follows,  
9

10  
11 E-mail: [yujiakuo@126.com](mailto:yujiakuo@126.com)  
12

13  
14 Address: Institute of Sports Medicine, Peking University Third Hospital, Beijing Key  
15

16  
17 Laboratory of Sports Injuries, Beijing, 100191, China  
18

19  
20 Yours sincerely,  
21

22 Dr. Huang  
23  
24  
25  
26  
27  
28  
29  
30  
31  
32  
33  
34  
35  
36  
37  
38  
39  
40  
41  
42  
43  
44  
45  
46  
47  
48  
49  
50  
51  
52  
53  
54  
55  
56  
57  
58  
59  
60

# BMJ Open

## Physical Therapy and Orthopedic Equipment-induced Reduction in the Biomechanical Risk Factors Related to Knee Osteoarthritis: A systematic review and Bayesian network meta-analysis of randomized controlled trials

|                                 |                                                                                                                                                                                                                                                                                                                                                              |
|---------------------------------|--------------------------------------------------------------------------------------------------------------------------------------------------------------------------------------------------------------------------------------------------------------------------------------------------------------------------------------------------------------|
| Journal:                        | <i>BMJ Open</i>                                                                                                                                                                                                                                                                                                                                              |
| Manuscript ID                   | bmjopen-2021-051608.R1                                                                                                                                                                                                                                                                                                                                       |
| Article Type:                   | Original research                                                                                                                                                                                                                                                                                                                                            |
| Date Submitted by the Author:   | 15-Nov-2021                                                                                                                                                                                                                                                                                                                                                  |
| Complete List of Authors:       | Huang, XiMeng; Peking University Third Hospital<br>Yuan, Fu-Zhen; Peking University Third Hospital<br>Chen, You-Rong; Peking University Third Hospital<br>Huang, Ying; Peking Union Medical College Hospital<br>Yang, Ze-Xi; Peking University Third Hospital<br>Lin, Lin; Peking University Third Hospital<br>Yu, Jia-Kuo; Peking University Third Hospital |
| <b>Primary Subject Heading</b>: | Sports and exercise medicine                                                                                                                                                                                                                                                                                                                                 |
| Secondary Subject Heading:      | Evidence based practice, Rehabilitation medicine                                                                                                                                                                                                                                                                                                             |
| Keywords:                       | Biophysics < NATURAL SCIENCE DISCIPLINES, Adult orthopaedics < ORTHOPAEDIC & TRAUMA SURGERY, Knee < ORTHOPAEDIC & TRAUMA SURGERY, REHABILITATION MEDICINE                                                                                                                                                                                                    |
|                                 |                                                                                                                                                                                                                                                                                                                                                              |

SCHOLARONE™  
Manuscripts





I, the Submitting Author has the right to grant and does grant on behalf of all authors of the Work (as defined in the below author licence), an exclusive licence and/or a non-exclusive licence for contributions from authors who are: i) UK Crown employees; ii) where BMJ has agreed a CC-BY licence shall apply, and/or iii) in accordance with the terms applicable for US Federal Government officers or employees acting as part of their official duties; on a worldwide, perpetual, irrevocable, royalty-free basis to BMJ Publishing Group Ltd ("BMJ") its licensees and where the relevant Journal is co-owned by BMJ to the co-owners of the Journal, to publish the Work in this journal and any other BMJ products and to exploit all rights, as set out in our [licence](#).

The Submitting Author accepts and understands that any supply made under these terms is made by BMJ to the Submitting Author unless you are acting as an employee on behalf of your employer or a postgraduate student of an affiliated institution which is paying any applicable article publishing charge ("APC") for Open Access articles. Where the Submitting Author wishes to make the Work available on an Open Access basis (and intends to pay the relevant APC), the terms of reuse of such Open Access shall be governed by a Creative Commons licence – details of these licences and which [Creative Commons](#) licence will apply to this Work are set out in our licence referred to above.

Other than as permitted in any relevant BMJ Author's Self Archiving Policies, I confirm this Work has not been accepted for publication elsewhere, is not being considered for publication elsewhere and does not duplicate material already published. I confirm all authors consent to publication of this Work and authorise the granting of this licence.

1 **Title: Physical Therapy and Orthopedic Equipment-induced Reduction in the**  
 2 **Biomechanical Risk Factors Related to Knee Osteoarthritis: A systematic review**  
 3 **and Bayesian network meta-analysis of randomized controlled trials**

4 **Authors:** Xi-Meng Huang<sup>1\*</sup>, MD; Fu-Zhen Yuan<sup>1\*</sup>, MD; You-Rong Chen<sup>1</sup>, MD; Ying  
 5 Huang<sup>2</sup>, MD; Ze-Xi Yang<sup>3</sup>, MD; Lin Lin<sup>1</sup>, MD; Jia-Kuo Yu<sup>1</sup>, MD&PhD

6 1. Institute of Sports Medicine, Peking University Third Hospital, Beijing Key  
 7 Laboratory of Sports Injuries, Beijing, 100191, China

8 2. Peking Union Medical College, Plastic Surgery Hospital, Chinese Academy of  
 9 Medical Sciences, Beijing, China.

10 3. Department of Orthopedic, Peking University Third Hospital, Beijing, 100191,  
 11 China

12 Xi-Meng Huang: [1510301201@pku.edu.cn](mailto:1510301201@pku.edu.cn)

13 Fu-Zhen Yuan: [yuanfuzhen2009@sina.com](mailto:yuanfuzhen2009@sina.com)

14 You-Rong Chen: [chenyourong1990@qq.com](mailto:chenyourong1990@qq.com)

15 Ying Huang: [1510122916@pku.edu.cn](mailto:1510122916@pku.edu.cn)

16 Ze-Xi Yang: [15101301202@pku.edu.cn](mailto:15101301202@pku.edu.cn)

17 Lin Lin: [simon.lin2003@163.com](mailto:simon.lin2003@163.com)

18 Jia-Kuo Yu: [yujiakuo@126.com](mailto:yujiakuo@126.com); Tel: 86-10-1861290798

19 First author: Xi-Meng Huang and Fu-Zhen Yuan

20 Corresponding author: Lin Lin and Jia-Kuo Yu

21 **Full correspondence details (for review) for contact purposes only:**

|             |                                                                                                              |
|-------------|--------------------------------------------------------------------------------------------------------------|
| Name        | Jia-Kuo Yu                                                                                                   |
| Institution | Institute of Sports Medicine, Peking University Third Hospital,<br>Beijing Key Laboratory of Sports Injuries |
| Country     | China                                                                                                        |
| Tel         | 86-10-1861290798                                                                                             |
| Mob         | Nil                                                                                                          |
| Fax         | Nil                                                                                                          |
| Email       | <a href="mailto:yujiakuo@126.com">yujiakuo@126.com</a>                                                       |

22 **Full correspondence (for publication) for contact purposes only:**

|      |            |
|------|------------|
| Name | Jia-Kuo Yu |
|------|------------|

Knee osteoarthritis (KOA); Knee adduction moment (KAM); Knee adduction angular impulse (KAAI)

|             |                                                                                                              |
|-------------|--------------------------------------------------------------------------------------------------------------|
| Institution | Institute of Sports Medicine, Peking University Third Hospital,<br>Beijing Key Laboratory of Sports Injuries |
| Country     | China                                                                                                        |
| Email       | <a href="mailto:yujiakuo@126.com">yujiakuo@126.com</a>                                                       |

23 **Abbreviated title:** Biomechanical Phenomena, Osteoarthritis, Knee, Physical and  
24 Rehabilitation Medicine

25 **Key words:** Physical Therapy; Orthopedic Equipment; Knee Osteoarthritis;  
26 KAM; KAAI; Bayesian Network Meta-analysis.

27 **Word Count:** 303words (Abstract)  
28 3953words (Introduction, Method, Results, Discussion)

29 **References:** 68

30 **Tables:** 3

31 **Figures:** 4

32 **eAddenda:** 1

33 **Ethics approval:** Nil

34 **Competing interests:** Nil

35 **Source(s) of support:** This work was supported by the National Key R&D Program of  
36 China (No.2017YFB1303000) and the Construction of a Basic  
37 Public Service Platform for Industrial Technology in the Field  
38 of Advanced Medical Equipment (0714-EMTC-02-00897).

39 **Correspondence:** Jia-Kuo Yu, Institute of Sports Medicine, Peking University Third  
40 Hospital, Beijing Key Laboratory of Sports Injuries, China,  
41 [yujiakuo@126.com](mailto:yujiakuo@126.com)

1  
2  
3 63

4 64

5 65

6  
7  
8 66 **ABSTRACT**

9  
10 67 *Objective:* Are physical therapy and orthopedic equipment efficacious in reducing the  
11  
12 68 biomechanical risk factors in people with tibiofemoral OA? Is there a better treatment  
13  
14  
15 69 than others to improve these outcomes?

16  
17  
18 70 *Design:* Systematic review with network meta-analysis of randomised trials.

19  
20  
21 71 *Data sources:* PubMed, Web of Science, Cochrane Library, Embase, and MEDLINE  
22  
23 72 were searched through January 2021.

24  
25  
26 73 *Eligibility criteria for selecting studies:* We included randomised controlled trials  
27  
28 74 exploring the benefits of using physical therapy and orthopedic equipment in reducing  
29  
30  
31 75 the biomechanical risk factors which included the KAM and the KAAI in patients with  
32  
33 76 tibiofemoral OA.

34  
35  
36 77 *Data extraction and synthesis:* Two authors extracted data independently and assessed  
37  
38 78 risk of bias. We conducted a network meta-analysis to compare multiple interventions,  
39  
40  
41 79 including both direct evidences and indirect evidences. Heterogeneity was assessed  
42  
43  
44 80 (sensitivity analysis) and quantified ( $I^2$  statistic). GRADE assessed the certainty of the  
45  
46  
47 81 evidence.

48  
49 82 *Results:* Eighteen randomized controlled trials, including 944 participants, met the  
50  
51  
52 83 inclusion criteria. Based on the collective probability of being the overall best therapy  
53  
54  
55 84 for reducing the first peak KAM, lateral wedge insoles (LWI) plus knee brace was  
56  
57 85 closely followed by gait retraining, and knee brace only. Although no significant  
58  
59  
60 86 difference was observed among the eight interventions, variable-stiffness shoe and  
Knee osteoarthritis (KOA); Knee adduction moment (KAM); Knee adduction angular impulse (KAAI)

1  
2  
3  
4 87 neuromuscular exercise exhibited an increase in the first peak KAM compared to the  
5  
6 88 standard care group. And based on the collective probability of being the overall best  
7  
8  
9 89 therapy for reducing KAAI, gait retraining was followed by LWI only, and lower limb  
10  
11  
12 90 exercise.

13  
14 91 *Conclusion:* The ranking statistics like surface under the cumulative ranking curve  
15  
16  
17 92 values of our Bayesian network meta-analysis support the use of LWI plus knee brace  
18  
19  
20 93 for reducing the first peak KAM. We found gait retraining to be the most efficacious  
21  
22  
23 94 intervention as it could reduce the values for KAM and KAAI at the same time based  
24  
25 95 on cumulative ranking and relative effect estimates.

## 26 27 96 **Strengths and limitations**

- 28  
29  
30 97 ① This Bayesian network meta-analysis is the first review on efficacy of physical  
31  
32 98 therapy and orthopedic equipment on the biomechanical parameters (KAM &  
33  
34  
35 99 KAAI) of the knee OA.
- 36  
37  
38 100 ② the Bayesian method provided the probability estimates regarding the superior  
39  
40 101 efficacy of specific interventions, even though the standard methods described the  
41  
42  
43 102 absence of a significant difference between them.
- 44  
45  
46 103 ③ Physical therapies and orthopedic equipment are complex interventions with a  
47  
48 104 small number of trials comparing the different types of interventions.
- 49  
50  
51 105 ④ Besides KAM and KAAI, we were temporarily unable to include other  
52  
53 106 biomechanical risk factors, such as the external knee flexion moment to joint load.

54  
55  
56 107

57  
58 108

## 109 1. INTRODUCTION

110 Knee osteoarthritis (KOA), a chronic progressive disease, affects approximately 3.8%  
111 of people worldwide, mainly middle-aged and older adults.<sup>1,2</sup> The main clinical  
112 manifestation of KOA is knee pain and is often accompanied by radiographic  
113 degeneration of the intra-articular cartilage associated with hypertrophic bone  
114 changes.<sup>3</sup> With the development of KOA, patients may also report stiffness, locking,  
115 instability and function loss. Though it is not fatal, the persistent pain and movement  
116 difficulties associated with this condition negatively impact the physical and mental  
117 health of the patients; thus, reducing their quality of life.<sup>4</sup>

118 These pathological changes of knee joint structure are the result of the break of  
119 biomechanical balance and the progression of the disease is now believed to be  
120 associated with malalignment of the lower limb.<sup>5</sup> Of the three compartments of a  
121 knee joint, KOA mostly occurs in the medial tibiofemoral compartment as it bears  
122 60-91% of the total body load, higher than the lateral one.<sup>6</sup> The external knee  
123 adduction moment (KAM) results from the unequal distribution of the transmitted  
124 load on both sides in the normal gait of humans. It is defined as the cross product  
125 of the ground reaction force and the distance between the knee joint and the force  
126 line.<sup>7</sup> Individuals with obesity,<sup>8</sup> meniscal lesions,<sup>9</sup> occupational load<sup>10</sup> or other risk  
127 factors tend to have frontal plane knee malalignment, which alters the normal force  
128 line, forcing the medial knee joint to bear more load and increased KAM.<sup>11,12</sup> The  
129 accumulation effect of the moment is determined by calculating the integral of the  
130 moment to time, which is also termed as knee adduction angular impulse (KAAI).

Knee osteoarthritis (KOA); Knee adduction moment (KAM); Knee adduction angular impulse (KAAI)

1  
2  
3  
4 131 It reflects the change in knee joint rotation state during a stance period of gait.<sup>13</sup>  
5  
6 132 Previous studies have revealed a strong correlation between the peak levels of KAM  
7  
8  
9 133 and KAAI and the severity and progression of the disease, which was reflected and  
10  
11 134 calculated by the loss of medial tibial cartilage.<sup>14,15</sup> Both these biomechanical  
12  
13  
14 135 parameters (KAM and KAAI) are commonly used to evaluate the medial knee load  
15  
16  
17 136 and predict the long-term structural deterioration.  
18  
19 137 Recent advancements in healthcare have resulted in the development of several  
20  
21  
22 138 protocols for the intervention and treatment of KOA. KOA patients are primarily  
23  
24  
25 139 recommended physical therapy and orthopedic equipment with the intention of  
26  
27  
28 140 correcting the deviated force line and delaying the progressive pathological damage  
29  
30  
31 141 inside the knee joint.<sup>7</sup> Both these modalities focus on relieving pain and improving  
32  
33  
34 142 patients' symptoms by changing the biomechanical state of the knee joint. The  
35  
36  
37 143 physical therapy mainly includes muscular strengthening, exercise therapy, electric  
38  
39  
40 144 stimulation therapy, extracorporeal shockwave therapy and gait modification, while  
41  
42  
43 145 orthopedic equipment mainly includes customized shoes/footwear, wedged insoles,  
44  
45  
46 146 and knee braces.  
47  
48 147 Previous studies have shown the positive impact of physical therapy and orthopedic  
49  
50  
51 148 equipment in KOA. The strengthening of related lower limb muscles, which play a  
52  
53  
54 149 vital role in disease progression, are known to reduce instability and abnormal  
55  
56  
57 150 stresses across the joint. Previous studies have shown that a lower knee joint loading  
58  
59  
60 151 rate in patients with stronger quadriceps and hamstring.<sup>16</sup> Additionally, gait training  
152 presents a viable way to correct the patients' underlying gait pattern, which could

1  
2  
3  
4 153 also reduce their knee load and pain.<sup>17,18</sup> Further, several kinds of orthotic devices  
5  
6 154 have been introduced for the treatment of KOA. The clinical use of lateral wedge  
7  
8  
9 155 insoles (LWI) has gained immense popularity since its origin in 1987.<sup>19,20</sup> The  
10  
11  
12 156 insoles work by shifting the lateral part of the foot more than the medial part by a  
13  
14  
15 157 slope. Thus, a slope is created to increase the valgus tendency of lower extremities.  
16  
17 158 The center of the ground reaction force is shifted laterally, which induces a  
18  
19  
20 159 reduction in force lever arm length and magnitude. Also, the valgus knee brace is a  
21  
22  
23 160 commonly used device. It applies an external valgus force around the knee joint to  
24  
25  
26 161 reduce the medial knee load.

27  
28 162 In the past, several systematic reviews and meta-analysis have been published  
29  
30  
31 163 featuring the medical effects of a single KOA treatment. However, only a few of  
32  
33  
34 164 them have focused on multifaceted interventions. Also, only a few reviews have  
35  
36  
37 165 reported the effects of these changes on the biomechanical parameters. The  
38  
39  
40 166 mechanical changes in the body were not sufficiently investigated. Current reviews  
41  
42  
43 167 on KAM and KAAI have also not compared these changes. Thus, we performed a  
44  
45  
46 168 network meta-analysis (NMA) to appraise the benefits of physical treatments and  
47  
48  
49 169 orthopedic equipment in reducing the biomechanical risk factors in KOA patients  
50  
51  
52 170 to overcome these shortcomings, and to help achieve the goal of reducing pain and  
53  
54  
55 171 improving function.

56  
57 172 Therefore the research questions for this systematic review were:

- 58  
59 173 1. Are physical therapy and orthopedic equipment efficacious in reducing the  
60  
174 biomechanical risk factors in people with KOA?



1  
2  
3  
4 175 2. Is there a better treatment than others to improve these outcomes?  
5

6 176 **2. METHODS**  
7  
8

9 177 All pooled analyses were derived from previous studies and, therefore, did not  
10  
11 178 require ethical approval and informed consent.  
12  
13

14 179 **2.1 Identification and selection of studies.**  
15  
16

17 180 We searched the following databases for randomized controlled trials that were  
18  
19 181 published before January 2021, which explored the benefits of using physical  
20  
21 182 therapy and orthopedic equipment in reducing the biomechanical risk factors which  
22  
23 183 included the KAM and the KAAI in patients with tibiofemoral OA: PubMed, Web  
24  
25 184 of Science, Cochrane Library, Embase, and MEDLINE. The search was not  
26  
27 185 restricted by date, publication type, or publication status (see Appendix 1).  
28  
29 186 Additionally, we performed manual analyses of the published references regarding  
30  
31 187 the use of physical therapy and orthopedic equipment for treating KOA.  
32  
33  
34  
35  
36  
37

38 188 The eligibility of searched publications was independently reviewed by HXM, YZX  
39  
40 189 following the Cochrane manual.<sup>21</sup> Any additional inconsistencies were resolved  
41  
42 190 either by deliberation or by a senior expert (HY). First, the study titles and abstracts,  
43  
44 191 published in the English language, were screened. Next, complete articles were  
45  
46 192 reviewed against the following criteria in Box 1.  
47  
48  
49

50 193 Eligible comparison subjects, including standard/conventional care or waiting list  
51  
52 194 control (analgesic advice and education), were defined as “standard care.” Standard  
53  
54 195 care treatment also included placebo intervention, no intervention, and sham-  
55  
56 196 exercise. In this network meta-analysis, lower limb exercise was defined as the  
57  
58  
59  
60

1  
2  
3  
4 197 simultaneous exercise of multiple groups of muscles (including hip abductors,  
5  
6 198 quadriceps, and hamstrings). Since our research needed to maintain clinical and  
7  
8  
9 199 statistical homogeneity and also focus on the left-over biomechanical effects after  
10  
11 200 intervention, we selected articles whose measurements were strictly obtained under  
12  
13  
14 201 the condition of bare foot.

15  
16  
17 202 The exclusion criteria included: (1) studies that were not consistent with the  
18  
19 203 eligibility criteria; (2) studies that were in the form of the non-experimental papers,  
20  
21 204 including abstracts, comments, letters, or reviews; (3) studies including participants  
22  
23 205 who had received surgical treatment in the past; (4) studies that did not report  
24  
25 206 suitable data which included the KAM or the KAAI.

## 207 **2.2 Data Collection and Quality assessment.**

208 KAM and KAAI were the preferred biomechanical measures used in this meta-  
209 analysis. The biomechanical indicators of the studies included in the Bayesian  
210 network meta-analysis were measured on flat ground or treadmills. The number of  
211 trials that focused on the second peak of KAM was insufficient to conduct an  
212 independent network meta-analysis.

213 Two authors (HXM, YZX) extracted data independently and then cross-checked the  
214 data. A predefined information sheet was used to extract the data, which included  
215 the details of the first author (name), country, year of publication, population  
216 characteristics, intervention, and the time point. The authors of the original study  
217 were contacted if more data was required.

## 218 **2.3 Assessment of characteristics of studies.**

Knee osteoarthritis (KOA); Knee adduction moment (KAM); Knee adduction angular impulse (KAAI)

1  
2  
3  
4 219 *Risk of bias*

5  
6 220 In this network meta-analysis, we used the Cochrane Risk of Bias tool 2 (RoB2) to  
7  
8  
9 221 assess the risk of bias in randomized controlled trials using the following evaluation  
10  
11 222 indicators: randomization process, deviations from intended interventions, missing  
12  
13  
14 223 outcome data, measurement of the outcome, and selection of the reported result.<sup>21</sup>  
15  
16  
17 224 The judgment of the bias risk of this item was presented as "low," "high," and "  
18  
19 225 some concerns." Two authors independently evaluated the risk of bias of the  
20  
21  
22 226 included studies. The authors discussed or referred to the opinion of a senior author  
23  
24  
25 227 to resolve any disagreements. Additionally, we evaluated the certainty of evidence  
26  
27 228 which contributed to network estimates of the main outcomes with the Grading of  
28  
29  
30 229 Recommendations Assessment, Development and Evaluation (GRADE)  
31  
32 230 framework.

33  
34  
35 231 *Intervention*

36  
37  
38 232 In order to describe the experimental intervention, we extracted the following  
39  
40 233 information: the method of training with relevant further details, the details and  
41  
42  
43 234 characteristics of orthopedic equipment, the frequency and total duration of training  
44  
45  
46 235 or wearing.

47  
48 236 *Outcome measures*

49  
50  
51 237 Baseline biomechanical risk factors were extracted from walking test without any  
52  
53 238 orthopedic equipment before intervention, and post-intervention biomechanical risk  
54  
55  
56 239 factors were extracted from walking test with orthopedic equipment. Biomechanical  
57  
58 240 risk factors included the first peak KAM, the second peak KAM and KAAI. KAM

1  
2  
3  
4 241 was normalized as %body weight times height, with conversion to Nm/kg where  
5  
6 242 necessary. KAAI was the accumulation effect of the moment which was determined  
7  
8  
9 243 by calculating the integral of the moment to time.  
10

#### 11 244 **2.4 Statistical Analysis.**

12  
13  
14 245 We conducted a network meta-analysis to compare multiple interventions,  
15  
16  
17 246 including both direct evidences (where treatments were compared directly) and  
18  
19  
20 247 indirect evidences (where treatments were compared with a common control),  
21  
22  
23 248 maintaining randomization in each independent study.<sup>22-24</sup> Interventions and  
24  
25 249 demographic characteristics were either consistent or comparable across the  
26  
27  
28 250 included studies.<sup>25-30</sup> At the same time, we did not include the studies that only  
29  
30 251 reported the immediate effect into meta-analysis.  
31

32 252 Due to different units, the continuous data used the standard mean difference (SMD)  
33  
34  
35 253 as the statistical indicator of the effect, and the Frequentist 95% confidence interval  
36  
37  
38 254 (CI) of each effect was calculated. Additionally, the  $I^2$  statistic was used to analyze  
39  
40  
41 255 the overall heterogeneity of the two-arm study and the network. The fixed-effect  
42  
43  
44 256 model was used in case no statistical heterogeneity was found between the studies  
45  
46  
47 257 ( $p > 0.05$ ,  $I^2 < 50\%$ ); given the heterogeneity between studies, a random-effects  
48  
49  
50 258 model for meta-analysis was used.<sup>31</sup> A sensitivity analysis (see Appendix 2, eFigure  
51  
52  
53 259 1 and 2) was conducted by omitting one study and investigating the influence of a  
54  
55  
56 260 single study on the overall pooled estimate to evaluate the source of heterogeneity.  
57  
58  
59 261 The Node-Split Model was used for testing consistency (see Appendix 3, eFigure  
60  
262 3). If  $p > 0.05$ , then the consistency model was used for analysis; else, the

1  
2  
3  
4 263 inconsistency model was used for analysis.<sup>32</sup> Normal likelihood distributions were  
5  
6 264 assumed, non-informative prior distributions were set, and three Markov chains  
7  
8  
9 265 were run simultaneously. The number of update iterations was 50,000, a total of  
10  
11 266 5000 simulations were used for annealing, and the subsequent 45,000 iterations  
12  
13  
14 267 were examined. The mean rank and surface under the cumulative ranking curve  
15  
16  
17 268 (SUCRA) were used for reporting the probability values. A SUCRA value of 100%  
18  
19 269 was considered best, whereas 0% indicated the worst treatment.<sup>33</sup> Besides, we also  
20  
21  
22 270 made a conventional meta-analysis (see Appendix 4, eFigure 4a, 4b and 4c).  
23  
24  
25 271 The data from eligible studies were combined using the Review Manager (RevMan)  
26  
27 272 software v5.3. The contribution of the effect sizes was dependent on the sample size  
28  
29  
30 273 and their estimation accuracy. We performed the Bayesian analyses using  
31  
32  
33 274 WinBUGs v1.4.3. Stata (StataCorp. 2015. Stata Statistical Software: Release 15.  
34  
35 275 College Station, TX: StataCorp LP) was used to conduct the frequentist NMA.

### 276 3. RESULTS

#### 277 3.1 Flow of studies through the review

278 Overall, the database search strategy found 4919 citation. After screening articles  
279 by title and abstract, and deleting duplicate articles, we identified 526 studies that  
280 might meet the criteria for inclusion, and then we searched and evaluated their full  
281 text. Figure 1 presents the study selection flow chart. Eighteen randomized  
282 controlled trials, including 944 participants, met the inclusion criteria.<sup>34-51</sup> Since the  
283 present network meta-analysis only considered trials comparing the nine treatments  
284 with usual care or each other (see Appendix 5, eFigure 5a and 5b), only fourteen

1  
2  
3  
4 285 trials (792 participants) were included.  
5

6  
7 **286 3.2 Characteristics of included studies**  
8

9 287 All studies included the radiologically confirmed tibiofemoral OA. The duration of  
10  
11 288 treatment ranged from 2 weeks to 12 months, although most intervention times were  
12  
13  
14 289 administered over an 8-13-week period. The number of exercises varied from 2-5  
15  
16  
17 290 times per week, depending on the preparation.<sup>40,42,45,46</sup> Both studies of gait training  
18  
19 291 used the faded feedback paradigm, which meant gradual removal of the real-time  
20  
21  
22 292 biofeedback.<sup>36,41</sup> Of the fourteen studies that were included in NMA, nine were  
23  
24  
25 293 classified as Kellgren/Lawrence grade 2 and above. All studies reported either the  
26  
27 294 BMI or the values for height and weight, and in some studies recruiting a general  
28  
29  
30 295 population, the mean BMI was classified as overweight or obese. One study  
31  
32  
33 296 included in NMA had a randomized crossover design.<sup>34</sup> After referring to the  
34  
35 297 manual and consulting a professional statistician, the mean and standard deviation  
36  
37  
38 298 of the experimental and the control groups were analyzed in this network meta-  
39  
40  
41 299 analysis.<sup>21</sup> Tables 1 and 2 summarize the characteristics of the included studies and  
42  
43 300 participants.  
44

45 **301 3.3 KAM.**  
46

47  
48 302 A study reported that the VER-brace offers additional advantages on first peak  
49  
50  
51 303 KAM compared to V3P-brace and ACL-brace.<sup>51</sup> No first peak KAM reduction was  
52  
53  
54 304 observed between proprioceptive neuromuscular facilitation group and control  
55  
56 305 group,<sup>49</sup> and the result of the study of minimal footwear was the same.<sup>48</sup> On the  
57  
58  
59 306 other hand, after the electroacupuncture treatment, compared with the control group,  
60

1  
2  
3  
4 307 the second peak KAM significantly increased immediately when the patient  
5  
6 308 ascended stairs.<sup>50</sup> Table 3 shows the NMA results of a comparative analysis of the  
7  
8  
9 309 reduction of the first peak KAM. We found insignificant differences in most of the  
10  
11 310 treatment modalities; however, variable-stiffness shoes showed a statistically  
12  
13  
14 311 significant increase in the first peak KAM over the rest of the included interventions.  
15  
16  
17 312 Neuromuscular exercise was better than variable-stiffness shoes, but was still  
18  
19 313 inferior to most other interventions. At the same time, lateral wedge insole plus knee  
20  
21  
22 314 brace and gait retraining performed relatively well in reducing the first peak KAM  
23  
24  
25 315 compared with standard care and other treatments. Based on the collective  
26  
27 316 probability of being the overall best therapy for reducing the first peak KAM, LWI  
28  
29  
30 317 plus knee brace (93.4%) was closely followed by gait retraining (85.7%), and knee  
31  
32  
33 318 brace only (79.3%) (Figure 2).

### 319 3.4 KAAI.

37 320 KAAI was reported in ten studies.<sup>34,36,40,43-48,51</sup> After wearing the three kinds of  
38  
39  
40 321 brace separately, the KAAI measured without brace did not decrease significantly,  
41  
42  
43 322 and there was no significant difference between the groups.<sup>51</sup> Table 3 shows the  
44  
45 323 NMA results of the reduction of KAAI. Most treatments were not statistically  
46  
47  
48 324 different from each other, consistent with the results of the first peak KAM. Only  
49  
50  
51 325 gait retraining has a statistical reduction compared with the standard care treatment.  
52  
53 326 The aggregated results suggested that gait retraining is efficient in reducing the  
54  
55  
56 327 KAAI, while neuromuscular exercise will relatively increase the KAAI compared  
57  
58  
59 328 with some treatment. Based on the collective probability of being the overall best  
60

1  
2  
3  
4 329 therapy for reducing KAAI, gait retraining (90.7%) was followed by LWI only  
5  
6 330 (74.1%), and lower limb exercise (53.8%) (Figure 3).  
7  
8

### 9 331 **3.5 Heterogeneity.**

10  
11 332 We removed a study which had a short follow-up time and might cause  
12  
13 333 heterogeneity,<sup>34</sup> and performed another network meta-analysis. There is no  
14  
15 334 difference between the results of the reanalysis and the current ranking (see  
16  
17 335 Appendix 2, eFigure 1 and 2).  
18  
19  
20  
21

### 22 336 **3.6 GRADE assessment**

23  
24 337 According to the GRADE framework (see Appendix 6), the quality of the most  
25  
26 338 comparisons was assessed as low or very low. Only neuromuscular exercise  
27  
28 339 compared with standard care, neuromuscular exercise compared with LWI,  
29  
30 340 neuromuscular exercise compared with knee brace, and neuromuscular exercise  
31  
32 341 compared with LWI plus knee brace were evaluated as a moderate-grade  
33  
34 342 comparison.  
35  
36  
37  
38  
39

### 40 343 **3.7 Risk of bias.**

41  
42 344 Figure 4 depicts a summary of the risk-of-bias scores for the included RCTs in this  
43  
44 345 analysis. Nine studies presented a clear description of generating a randomization  
45  
46 346 sequence.<sup>38-40,42,45-48,50</sup> The study by Hinman et al. was the only double-blinded  
47  
48 347 study, while other studies were either single-blinded or did not clearly describe their  
49  
50 348 blind design. All trials provided follow-up data on their outcomes. Six studies did  
51  
52 349 not report the number or the reason for lost visits due to the length of follow-  
53  
54 350 up.<sup>34,38,39,41,42,45</sup> Consequently, all studies were included in the synthesis evaluation  
55  
56  
57  
58  
59  
60



1  
2  
3  
4 351 and qualified for literature assessment. And we prepared comparison-adjusted  
5  
6 352 funnel plots that represented different comparisons with different colors. The funnel  
7  
8  
9 353 plots were symmetrically distributed based on a visual inspection, which suggested  
10  
11 354 the absence of small-sample effects for our outcomes (see Appendix 7, eFigure 6a  
12  
13  
14 355 and 6b).

#### 17 356 4. DISCUSSION

18  
19 357 Our results did not show significant differences regarding the superiority of  
20  
21  
22 358 intervention among different types of physical therapies and orthopedic equipment.  
23  
24 359 This lack of difference was attributed to the fact that the number of studies for  
25  
26  
27 360 several pairwise comparisons was small. However, some of these therapies were  
28  
29  
30 361 still worth recommending. Due to the small number of studies studying the outcome  
31  
32  
33 362 of the KAAI, we found gait retraining to be the relatively more convincing  
34  
35 363 intervention as it could reduce the values for KAM and KAAI at the same time  
36  
37  
38 364 based on cumulative ranking and relative effect estimates. Due to the lack of  
39  
40  
41 365 significant differences among the interventions, we were not able to conclusively  
42  
43 366 accept the cumulative ranking obtained by the network meta-analysis. For example,  
44  
45 367 gait retraining, which occupied the first rank position (90.7%) for reducing the  
46  
47  
48 368 KAAI, was only superior to the neuromuscular exercise interventions.

49  
50 369 This study had several strengths and limitations. This network meta-analysis is the  
51  
52  
53 370 first report on the effects of physical therapy and orthopedic equipment on the  
54  
55  
56 371 parameters of knee load (KAM, KAAI). Since physical therapies and orthopedic  
57  
58  
59 372 equipment are complex interventions with a small number of trials comparing the  
60

1  
2  
3  
4 373 different types of interventions, network meta-analysis appeared to be the most  
5  
6 374 relevant form of analysis. The results of this meta-analysis would be more useful  
7  
8  
9 375 for the decision-makers, service specialists, and caregivers to choose among the  
10  
11 376 various available options, compared with multiple separate pairwise meta-  
12  
13  
14 377 analyses.<sup>52</sup> Additionally, this network meta-analysis conducted each comparison  
15  
16  
17 378 separately with both direct and indirect statistical effects, deriving statistical power  
18  
19 379 from all included data.<sup>52</sup> Also, the Bayesian method provided the probability  
20  
21 380 estimates regarding the superior efficacy of specific interventions, even though the  
22  
23 381 standard methods described the absence of a significant difference between them.  
24  
25  
26  
27 382 In addition, we calculated alternative rankings (second, third best, etc), because in  
28  
29 383 some cases the best intervention might be unavailable, more costly, or  
30  
31 384 contraindicated in some patients. As with most meta-analyses on non-surgical  
32  
33 385 therapies for osteoarthritis, one of the limitations of this network meta-analysis  
34  
35 386 includes the inclusion of trials that had variable periods of follow-up, which could  
36  
37 387 have introduced heterogeneity into the study analysis. There exist several methods  
38  
39 388 of analyzing and comparing trials with multiple durations of follow-up, as  
40  
41 389 recommended by the Cochrane handbook, such as performing individual patient  
42  
43 390 data meta-analysis and evaluating at a particular time point. However, methods are  
44  
45 391 being developed that would include all time points in a network meta-analysis.<sup>21</sup>  
46  
47  
48 392 We were not able to evaluate the influence of population characteristics (such as  
49  
50 393 mean age, the severity of osteoarthritis), as the number of the included studies was  
51  
52  
53 394 not large enough.<sup>53-55</sup> Additionally, other parameters, such as the external knee  
54  
55  
56  
57  
58  
59  
60

1  
2  
3  
4 395 flexion moment to joint load, should have been studied. However, due to the small  
5  
6  
7 396 number of related articles, we were temporarily unable to include them.  
8  
9 397 A previous review showed that LWIs were able to reduce the KAM at baseline;<sup>56</sup>  
10  
11 398 however, the effect was no longer observed after a period. One study showed that a  
12  
13  
14 399 1-month wear-in period was the longest time period studied where no reduction in  
15  
16  
17 400 biochemical risk factors was observed despite continued wear.<sup>57</sup> Besides, several  
18  
19 401 systematic reviews had concluded that exercise and gait retraining could reduce  
20  
21  
22 402 pain and improve motor functioning in people with KOA,<sup>58-60</sup> it was possible that  
23  
24  
25 403 any clinical changes in previous studies may due to the increased physical activity  
26  
27 404 levels, and not have been the results of altered loading environment within the knee  
28  
29  
30 405 joint. Furthermore, another study revealed that an increase in the amount of  
31  
32  
33 406 reduction in peak KAM in LWIs plus knee brace group was observed after 4  
34  
35 407 weeks.<sup>61</sup> In this network meta-analysis, we focused on the studies of non-immediate  
36  
37  
38 408 effect, removed the research with a follow-up time of less than one month in the  
39  
40  
41 409 sensitivity analysis, and made the final rank. The results showed that only gait  
42  
43 410 training produces a significant reduction in KAM and KAAI, indicating that the  
44  
45 411 biomechanical reduction effect of orthopedic equipment cannot be maintained for  
46  
47  
48 412 a long time when they are donned. Once the time of the treatment was extended,  
49  
50  
51 413 the biomechanical reduction effect might lessen. The reason may be that orthopedic  
52  
53 414 equipment deform and render them less effective mechanically, although typically  
54  
55  
56 415 made of high density materials.  
57  
58  
59 416 On the other hand, physical therapies and orthopedic equipment also need to be  
60

1  
2  
3  
4 417 considered for relieving patients' pain, which has been the focus of several reviews  
5  
6 418 in the past. As an important factor in kinetics and kinematics of gait, the joint pain  
7  
8  
9 419 can affect the kinetics and kinematics of walking.<sup>62</sup> A meta-analysis reported that  
10  
11 420 exercise therapy had a positive impact on knee pain and kinematic function, though  
12  
13  
14 421 this relief of pain subsided with time. After initiation, the efficiency of physical  
15  
16  
17 422 exercise over placebo reached maxima at 2 months.<sup>63</sup>  
18  
19 423 Cumulative loading is another significant parameter regarding knee load exposure  
20  
21  
22 424 in OA.<sup>64</sup> KAAI has been proposed as another indicator to evaluate the duration and  
23  
24  
25 425 intensity of KOA load, despite the association between KAM and disease  
26  
27  
28 426 progression. According to a 12-month study, the loss of medial tibiofemoral  
29  
30  
31 427 cartilage was not directly related to KAM but was related to KAAI.<sup>65</sup> Although the  
32  
33  
34 428 effect of physical therapy and orthopedic equipment on KAM may gradually  
35  
36  
37 429 disappears, it may have a huge cumulative effect on the knee during the early stages  
38  
39  
40 430 of treatment. This should be considered while interpreting the results of this network  
41  
42  
43 431 meta-analysis.  
44  
45 432 The results presented in this study are both scientifically and clinically instructive.  
46  
47  
48 433 Despite observing a null statistical reduction in KAM and KAAI for most therapies,  
49  
50  
51 434 using these treatments clinically could improve symptoms and physical activity  
52  
53  
54 435 level without increasing the biomechanical magnitude; thus, improving the quality  
55  
56  
57 436 of life of patients with KOA. Although the results of this study suggested that  
58  
59  
60 437 wearing variable-stiffness shoes is not a good choice for long-term reduction of  
438 KAM, current study have pointed out that variable-stiffness shoe will have greater

1  
2  
3  
4 439 benefits in reducing KAM for patients with increasing walking speed.<sup>66</sup> At the same  
5  
6 440 time, variable-stiffness shoes had relatively weaker discomfort than equipment such  
7  
8  
9 441 as LWI. Since the studies included in this network meta-analysis mainly involves  
10  
11 442 patients with medial knee osteoarthritis, the results would be more useful for these  
12  
13  
14 443 patients.

15  
16  
17 444 On the other hand, previous study reported that the increase in KAAI can explain  
18  
19 445 the significant variation in the uCTX-II levels and the uCTX-II:sCPII ratio in  
20  
21  
22 446 patients with medial tibiofemoral KOA when additional variables are controlled.<sup>67</sup>

23  
24  
25 447 This showed that intervention in the biomechanical structure of the knee joint in  
26  
27 448 patients with KOA is a potential beneficial role on cartilage structure. Maleki et al.  
28  
29  
30 449 pointed out that adopting a modified gait that reduces the KAM can decrease the  
31  
32  
33 450 pain in the medial compartment in KOA more than walking alone,<sup>68</sup> which suggests  
34  
35 451 that the KAM and KAAI of patients under non-surgical treatment can be restricted  
36  
37  
38 452 to help reduce pain and improve joint function. More research is needed to further  
39  
40 453 illustrate the impact of changes in knee biomechanics on the prognosis of patients.

41  
42  
43 454 Additionally, some other therapies have been reported, such as Taiji, ultrasound,  
44  
45 455 acoustic exercise, etc. However, due to the lack of RCT study design or the report  
46  
47  
48 456 of their biomechanical outcomes, we were not able to include these therapies in our  
49  
50  
51 457 review. Therefore, further studies would require more research articles in these  
52  
53 458 areas to further explore the impact of various non-surgical therapies on OA patients.

54  
55  
56 459 After accumulating evidence regarding the role of non-surgical therapy in KOA, we  
57  
58  
59 460 could conduct a similar network meta-analysis to understand the relative  
60

1  
2  
3  
4 461 effectiveness of various types of these interventions in relevant patients.  
5

6  
7 462 **5. Conclusion**  
8

9 463 This network meta-analysis provides valuable insight regarding the alterations in  
10  
11 464 KAM and KAAI of OA patients after physical therapy and orthopedic equipment.  
12  
13  
14 465 After integrating cumulative ranking and relative effect estimates, gait retraining  
15  
16  
17 466 was the most recommended therapy for reducing the biomechanical risk factors. On  
18  
19 467 the contrary, variable-stiffness shoe and neuromuscular exercise needed to be used  
20  
21  
22 468 with caution in clinical treatment. Taken together, these findings suggest that  
23  
24  
25 469 clinicians should choose carefully when treating OA.  
26

27 470 **6. Authors' Contributions**  
28

29  
30 471 HXM and YFZ conceived of the study, and participated in its design and  
31  
32 472 coordination and helped to draft the manuscript; YZX, HY and CRY contributed  
33  
34  
35 473 significantly to analysis and manuscript preparation; YJK and LL helped perform  
36  
37  
38 474 the analysis with constructive discussions and revised it critically for important  
39  
40  
41 475 intellectual content.  
42

43 476 **7. Competing interests**  
44

45 477 There were no conflicts of interest.  
46  
47

48 478 **8. Funding**  
49

50  
51 479 This work was supported by the National Key R&D Program of China  
52  
53 480 (No.2017YFB1303000) and the Construction of a Basic Public Service Platform  
54  
55  
56 481 for Industrial Technology in the Field of Advanced Medical Equipment (0714-  
57  
58 482 EMTC-02-00897).  
59  
60

1  
2  
3  
4 483 **9. Ethics approval**

5  
6 484 Not required.

7  
8  
9 485 **10. Data availability statement**

10  
11 486 No data are available.

12  
13  
14 487 **11. Patient and public involvement**

15  
16  
17 488 Patients and/or the public were not involved in the design, or conduct, or reporting, or  
18  
19 489 dissemination plans of this research.

20  
21  
22 490 **References:**

- 23  
24 491 1. Srikanth VK, Fryer JL, Zhai G et al. A meta-analysis of sex differences prevalence, incidence and  
25 492 severity of osteoarthritis. *Osteoarthr Cartilage*. 2005;13(9):769-81
- 26 493 2. Cross M, Smith E, Hoy D et al. The global burden of hip and knee osteoarthritis: estimates from the  
27 494 global burden of disease 2010 study. *Ann Rheum Dis*. 2014;73(7):1323-30
- 28 495 3. Turpin KM, De Vincenzo A, Apps AM et al. Biomechanical and clinical outcomes with shock-  
29 496 absorbing insoles in patients with knee osteoarthritis: immediate effects and changes after 1 month  
30 497 of wear. *Arch Phys Med Rehab*. 2012;93(3):503-8
- 31 498 4. Neogi T. The epidemiology and impact of pain in osteoarthritis. *Osteoarthr Cartilage*.  
32 499 2013;21(9):1145-53
- 33 500 5. Tanamas S, Hanna FS, Cicuttini FM et al. Does knee malalignment increase the risk of development  
34 501 and progression of knee osteoarthritis? A systematic review. *Arthritis and rheumatism*.  
35 502 2009;61(4):459-67
- 36 503 6. Xing F, Lu B, Kuang M et al. A systematic review and meta-analysis into the effect of lateral wedge  
37 504 arch support insoles for reducing knee joint load in patients with medial knee osteoarthritis. *Medicine*.  
38 505 2017;96(24):e7168
- 39 506 7. Reeves ND, Bowling FL. Conservative biomechanical strategies for knee osteoarthritis. *Nature*  
40 507 *reviews. Rheumatology*. 2011;7(2):113-22
- 41 508 8. Sharma L, Lou C, Cahue S, Dunlop DD. The mechanism of the effect of obesity in knee osteoarthritis:  
42 509 the mediating role of malalignment. *Arthritis and rheumatism*. 2000;43(3):568-75
- 43 510 9. Rytter S, Jensen LK, Bonde JP, Jurik AG, Egund N. Occupational kneeling and meniscal tears: a  
44 511 magnetic resonance imaging study in floor layers. *The Journal of rheumatology*. 2009;36(7):1512-9
- 45 512 10. Jensen LK, Mikkelsen S, Loft IP et al. Radiographic knee osteoarthritis in floorlayers and carpenters.  
46 513 *Scandinavian journal of work, environment & health*. 2000;26(3):257-62
- 47 514 11. Block JA, Shakoor N. Lower limb osteoarthritis: biomechanical alterations and implications for  
48 515 therapy. *Curr Opin Rheumatol*. 2010;22(5):544-50
- 49 516 12. Englund M. The role of biomechanics in the initiation and progression of OA of the knee. *Best*  
50 517 *practice & research. Clinical rheumatology*. 2010;24(1):39-46
- 51 518 13. Arnold JB, Wong DX, Jones RK, Hill CL, Thewlis D. Lateral Wedge Insoles for Reducing

52  
53  
54  
55  
56  
57  
58  
59  
60  
Knee osteoarthritis (KOA); Knee adduction moment (KAM); Knee adduction angular impulse (KAAI)



- 1  
2  
3 519 Biomechanical Risk Factors for Medial Knee Osteoarthritis Progression: A Systematic Review and  
4 520 Meta-Analysis. *Arthrit Care Res.* 2016;68(7):936-51
- 5  
6 521 14. Brisson NM, Wiebenga EG, Stratford PW et al. Baseline knee adduction moment interacts with body  
7 522 mass index to predict loss of medial tibial cartilage volume over 2.5 years in knee Osteoarthritis.  
8 523 *Journal of orthopaedic research : official publication of the Orthopaedic Research Society.*  
9 524 2017;35(11):2476-2483
- 10  
11 525 15. Bennell KL, Bowles K, Wang Y et al. Higher dynamic medial knee load predicts greater cartilage  
12 526 loss over 12 months in medial knee osteoarthritis. *Ann Rheum Dis.* 2011;70(10):1770-4
- 13  
14 527 16. Mikesky AE, Meyer A, Thompson KL. Relationship between quadriceps strength and rate of loading  
15 528 during gait in women. *Journal of orthopaedic research : official publication of the Orthopaedic*  
16 529 *Research Society.* 2000;18(2):171-5
- 17  
18 530 17. Cheung RTH, Ho KKW, Au IPH et al. Immediate and short-term effects of gait retraining on the  
19 531 knee joint moments and symptoms in patients with early tibiofemoral joint osteoarthritis: a  
20 532 randomized controlled trial. *Osteoarthr Cartilage.* 2018;26(11):1479-1486
- 21  
22 533 18. Shull PB, Jirattigalachote W, Hunt MA, Cutkosky MR, Delp SL. Quantified self and human  
23 534 movement: a review on the clinical impact of wearable sensing and feedback for gait analysis and  
24 535 intervention. *Gait Posture.* 2014;40(1):11-9
- 25  
26 536 19. Sasaki T, Yasuda K. Clinical evaluation of the treatment of osteoarthritic knees using a newly  
27 537 designed wedged insole. *Clin Orthop Relat R.* 1987;(221):181-7
- 28  
29 538 20. Yasuda K, Sasaki T. The mechanics of treatment of the osteoarthritic knee with a wedged insole.  
30 539 *Clin Orthop Relat R.* 1987;(215):162-72
- 31  
32 540 21. Higgins JPT, Thomas J, Chandler J, Cumpston M, Li T, Page MJ, Welch VA (editors). Cochrane  
33 541 Handbook for Systematic Reviews of Interventions version 6.2 (updated February 2021). Cochrane,  
34 542 2021. Available from [www.training.cochrane.org/handbook](http://www.training.cochrane.org/handbook).
- 35  
36 543 22. Smith TC, Spiegelhalter DJ, Thomas A. Bayesian approaches to random-effects meta-analysis: a  
37 544 comparative study. *Stat Med.* 1995;14(24):2685-99
- 38  
39 545 23. Lu G, Ades AE. Combination of direct and indirect evidence in mixed treatment comparisons. *Stat*  
40 546 *Med.* 2004;23(20):3105-24
- 41  
42 547 24. Lu G, Ades AE, Sutton AJ et al. Meta-analysis of mixed treatment comparisons at multiple follow-  
43 548 up times. *Stat Med.* 2007;26(20):3681-99
- 44  
45 549 25. Dias S, Welton NJ, Caldwell DM, Ades AE. Checking consistency in mixed treatment comparison  
46 550 meta-analysis. *Stat Med.* 2010;29(7-8):932-44
- 47  
48 551 26. Cooper NJ, Sutton AJ, Morris D, Ades AE, Welton NJ. Addressing between-study heterogeneity and  
49 552 inconsistency in mixed treatment comparisons: Application to stroke prevention treatments in  
50 553 individuals with non-rheumatic atrial fibrillation. *Stat Med.* 2009;28(14):1861-81
- 51  
52 554 27. Welton NJ, Caldwell DM, Adamopoulos E, Vedhara K. Mixed treatment comparison meta-analysis  
53 555 of complex interventions: psychological interventions in coronary heart disease. *Am J Epidemiol.*  
54 556 2009;169(9):1158-65
- 55  
56 557 28. Salanti G, Higgins JPT, Ades AE, Ioannidis JPA. Evaluation of networks of randomized trials. *Stat*  
57 558 *Methods Med Res.* 2008;17(3):279-301
- 58  
59 559 29. Caldwell DM, Ades AE, Higgins JPT. Simultaneous comparison of multiple treatments: combining  
60 560 direct and indirect evidence. *BMJ (Clinical research ed.).* 2005;331(7521):897-900
- 61  
62 561 30. Lu G, Ades AE. Combination of direct and indirect evidence in mixed treatment comparisons. *Stat*  
63 562 *Med.* 2004;23(20):3105-24

Knee osteoarthritis (KOA); Knee adduction moment (KAM); Knee adduction angular impulse (KAAI)



- 1  
2  
3 563 31. Turner RM, Jackson D, Wei Y, Thompson SG, Higgins JPT. Predictive distributions for between-  
4 564 study heterogeneity and simple methods for their application in Bayesian meta-analysis. *Stat Med.*  
5 565 2015;34(6):984-98  
6  
7 566 32. Dias S, Welton NJ, Sutton AJ et al. Evidence synthesis for decision making 4: inconsistency in  
8 567 networks of evidence based on randomized controlled trials. *Medical decision making : an*  
9 568 *international journal of the Society for Medical Decision Making.* 2013;33(5):641-56  
10 569 33. Dias S, Welton NJ, Sutton AJ, Ades A. NICE DSU Technical Support Document 2: A Generalised  
11 570 Linear Modelling Framework for Pairwise and Network Meta-Analysis of Randomised Controlled  
12 571 Trials. *National Institute for Health and Care Excellence (NICE), London.* 2014;  
13  
14 572 34. Jones RK, Nester CJ, Richards JD et al. A comparison of the biomechanical effects of valgus knee  
15 573 braces and lateral wedged insoles in patients with knee osteoarthritis. *Gait Posture.* 2013;37(3):368-  
16 574 372  
17  
18 575 35. Khosravi M, Arazpour M, Sharafat Vaziri A. An evaluation of the use of a lateral wedged insole and  
19 576 a valgus knee brace in combination in subjects with medial compartment knee osteoarthritis (OA).  
20 577 *Assistive technology : the official journal of RESNA.* 2019:1-8  
21  
22 578 36. Hunt MA, Charlton JM, Krowchuk NM, Tse CTF, Hatfield GL. Clinical and biomechanical changes  
23 579 following a 4-month toe-out gait modification program for people with medial knee osteoarthritis: a  
24 580 randomized controlled trial. *Osteoarthr Cartilage.* 2018;26(7):903-911  
25  
26 581 37. Arazpour M, Bani MA, Maleki M et al. Comparison of the efficacy of laterally wedged insoles and  
27 582 bespoke unloader knee orthoses in treating medial compartment knee osteoarthritis. *Prosthet Orthot*  
28 583 *Int.* 2012;37(1):50-57  
29  
30 584 38. Lim BW, Hinman RS, Wrigley TV, Sharma L, Bennell KL. Does knee malalignment mediate the  
31 585 effects of quadriceps strengthening on knee adduction moment, pain, and function in medial knee  
32 586 osteoarthritis? A randomized controlled trial. *Arthritis & Rheumatism.* 2008;59(7):943-951  
33  
34 587 39. Erhart-Hledik JC, Elspas B, Giori NJ, Andriacchi TP. Effect of variable-stiffness walking shoes on  
35 588 knee adduction moment, pain, and function in subjects with medial compartment knee osteoarthritis  
36 589 after 1 year. *J Orthop Res.* 2012;30(4):514-521  
37  
38 590 40. Bennell KL, Hunt MA, Wrigley TV et al. Hip strengthening reduces symptoms but not knee load in  
39 591 people with medial knee osteoarthritis and varus malalignment: a randomised controlled trial.  
40 592 *Osteoarthr Cartilage.* 2010;18(5):621-628  
41  
42 593 41. Cheung RTH, Ho KKW, Au IPH et al. Immediate and short-term effects of gait retraining on the  
43 594 knee joint moments and symptoms in patients with early tibiofemoral joint osteoarthritis: a  
44 595 randomized controlled trial. *Osteoarthr Cartilage.* 2018;26(11):1479-1486  
45  
46 596 42. Foroughi N, Smith RM, Lange AK et al. Lower limb muscle strengthening does not change frontal  
47 597 plane moments in women with knee osteoarthritis: A randomized controlled trial. *Clin Biomech.*  
48 598 2011;26(2):167-174  
49  
50 599 43. Barrios JA, Butler RJ, Crenshaw JR, Royer TD, Davis IS. Mechanical effectiveness of lateral foot  
51 600 wedging in medial knee osteoarthritis after 1 year of wear. *J Orthop Res.* 2013;31(5):659-664  
52  
53 601 44. Paterson KL, Kasza J, Bennell KL et al. Moderators and mediators of effects of unloading shoes on  
54 602 knee pain in people with knee osteoarthritis: an exploratory analysis of the SHARK randomised  
55 603 controlled trial. *Osteoarthr Cartilage.* 2018;26(2):227-235  
56  
57 604 45. Bennell KL, Kyriakides M, Metcalf B et al. Neuromuscular Versus Quadriceps Strengthening  
58 605 Exercise in Patients With Medial Knee Osteoarthritis and Varus Malalignment: A Randomized  
59 606 Controlled Trial. *Arthritis Rheumatol.* 2014;66(4):950-959

Knee osteoarthritis (KOA); Knee adduction moment (KAM); Knee adduction angular impulse (KAAI)

- 1  
2  
3 607 46. Hunt MA, Pollock CL, Kraus VB et al. Relationships amongst osteoarthritis biomarkers, dynamic  
4 608 knee joint load, and exercise: results from a randomized controlled pilot study. *BMC Musculoskelet*  
5 609 *Disord.* 2013;14:115  
6  
7 610 47. Holsgaard-Larsen A, Clausen B, Søndergaard J et al. The effect of instruction in analgesic use  
8 611 compared with neuromuscular exercise on knee-joint load in patients with knee osteoarthritis: a  
9 612 randomized, single-blind, controlled trial. *Osteoarthr Cartilage.* 2017;25(4):470-480  
10  
11 613 48. Trombini-Souza F, Matias AB, Yokota M et al. Long-term use of minimal footwear on pain, self-  
12 614 reported function, analgesic intake, and joint loading in elderly women with knee osteoarthritis: A  
13 615 randomized controlled trial. *Clin Biomech.* 2015;30(10):1194-1201  
14  
15 616 49. Song Q, Shen P, Mao M et al. Proprioceptive neuromuscular facilitation improves pain and  
16 617 descending mechanics among elderly with knee osteoarthritis. *Scand J Med Sci Spor.*  
17 618 2020;30(9):1655-1663  
18  
19 619 50. Wang X, Xie X, Hou M et al. Kinetic mechanism of electroacupuncture for stair climbing in knee  
20 620 osteoarthritis patients. *Zhongguo zhen jiu = Chinese acupuncture & moxibustion.* 2017;37(10):1027-  
21 621 34  
22  
23 622 51. Robert-Lachaine X, Dessery Y, Belzile ÉL, Turmel S, Corbeil P. Three-month efficacy of three knee  
24 623 braces in the treatment of medial knee osteoarthritis in a randomized crossover trial. *Journal of*  
25 624 *orthopaedic research : official publication of the Orthopaedic Research Society.* 2020;38(10):2262-  
26 625 2271  
27  
28 626 52. Cooper NJ, Kendrick D, Achana F et al. Network meta-analysis to evaluate the effectiveness of  
29 627 interventions to increase the uptake of smoke alarms. *Epidemiol Rev.* 2012;34:32-45  
30  
31 628 53. Schmid CH, Stark PC, Berlin JA, Landais P, Lau J. Meta-regression detected associations between  
32 629 heterogeneous treatment effects and study-level, but not patient-level, factors. *J Clin Epidemiol.*  
33 630 2004;57(7):683-97  
34  
35 631 54. Thompson SG, Higgins JPT. How should meta-regression analyses be undertaken and interpreted?  
36 632 *Stat Med.* 2002;21(11):1559-73  
37  
38 633 55. Lambert PC, Sutton AJ, Abrams KR, Jones DR. A comparison of summary patient-level covariates  
39 634 in meta-regression with individual patient data meta-analysis. *J Clin Epidemiol.* 2002;55(1):86-94  
40  
41 635 56. Arnold JB, Wong DX, Jones RK, Hill CL, Thewlis D. Lateral Wedge Insoles for Reducing  
42 636 Biomechanical Risk Factors for Medial Knee Osteoarthritis Progression: A Systematic Review and  
43 637 Meta-Analysis. *Arthrit Care Res.* 2016;68(7):936-951  
44  
45 638 57. Hinman RS, Bowles KA, Bennell KL. Laterally wedged insoles in knee osteoarthritis: do  
46 639 biomechanical effects decline after one month of wear? *Bmc Musculoskel Dis.* 2009;10:146  
47  
48 640 58. Bennell KL, Hinman RS. A review of the clinical evidence for exercise in osteoarthritis of the hip  
49 641 and knee. *J Sci Med Sport.* 2011;14(1):4-9  
50  
51 642 59. Fransen M, McConnell S, Hernandez-Molina G, Reichenbach S. Exercise for osteoarthritis of the  
52 643 hip. *The Cochrane database of systematic reviews.* 2009;(3):CD007912  
53  
54 644 60. Fransen M, McConnell S. Exercise for osteoarthritis of the knee. *The Cochrane database of*  
55 645 *systematic reviews.* 2008;(4):CD004376  
56  
57 646 61. Fu HCH, Lie CWH, Ng TP et al. Prospective study on the effects of orthotic treatment for medial  
58 647 knee osteoarthritis in Chinese patients: clinical outcome and gait analysis. *Hong Kong medical*  
59 648 *journal = Xianggang yi xue za zhi.* 2015;21(2):98  
60  
61 649 62. Divine JG, Hewett TE. Valgus Bracing for Degenerative Knee Osteoarthritis. *The Physician and*  
62 650 *Sportsmedicine.* 2005;33(2):40-46

Knee osteoarthritis (KOA); Knee adduction moment (KAM); Knee adduction angular impulse (KAAl)

- 1  
2  
3 651 63. Goh S, Persson MSM, Stocks J et al. Efficacy and potential determinants of exercise therapy in knee  
4 652 and hip osteoarthritis: A systematic review and meta-analysis. *Annals of Physical and Rehabilitation*  
5 653 *Medicine*. 2019;62(5):356-365  
6  
7 654 64. Maly MR. Abnormal and cumulative loading in knee osteoarthritis. *Curr Opin Rheumatol*.  
8 655 2008;20(5):547-52  
9  
10 656 65. Bennell KL, Bowles K, Wang Y et al. Higher dynamic medial knee load predicts greater cartilage  
11 657 loss over 12 months in medial knee osteoarthritis. *Ann Rheum Dis*. 2011;70(10):1770-4  
12  
13 658 66. Erhart-Hledik JC, Mahtani GB, Asay JL et al. Changes in knee adduction moment wearing a variable-  
14 659 stiffness shoe correlate with changes in pain and mechanically stimulated cartilage oligomeric matrix  
15 660 levels. *Journal of orthopaedic research : official publication of the Orthopaedic Research Society*.  
16 661 2021;39(3):619-627  
17  
18 662 67. Hunt MA, Pollock CL, Kraus VB et al. Relationships amongst osteoarthritis biomarkers, dynamic  
19 663 knee joint load, and exercise: results from a randomized controlled pilot study. *Bmc Musculoskel*  
20 664 *Dis*. 2013;14:115  
21  
22 665 68. Maleki M, Arazpour M, Joghtaei M et al. The effect of knee orthoses on gait parameters in medial  
23 666 knee compartment osteoarthritis: A literature review. *Prosthet Orthot Int*. 2016;40(2):193-201  
24 667

**Table 1. Characteristics of included studies (1) \***

| Authors                     | Country   | Clinical criteria†                                                                         | Radiographic features                                | Intervention                                                                                                                 | Comparisons                   | Follow up |
|-----------------------------|-----------|--------------------------------------------------------------------------------------------|------------------------------------------------------|------------------------------------------------------------------------------------------------------------------------------|-------------------------------|-----------|
| Barrios 2013 <sup>43</sup>  | US        | Medial compartment knee OA;<br>Pain VAS ( $\geq 3$ of 10 upon walking)                     | K/L grade $\geq 2$ , medial tibiofemoral compartment | bespoke full-length LWI                                                                                                      | Placebo                       | 12 months |
| Hinman 2016 <sup>44</sup>   | Australia | Medial compartment knee OA;<br>Pain NRS ( $> 4$ of 11 upon walking) over the previous week | K/L grade $\geq 2$ , medial tibiofemoral compartment | 5° full-length LWI                                                                                                           | Placebo                       | 6 months  |
| Arazpour 2012 <sup>37</sup> | Iran      | Medial compartment knee OA                                                                 | K/L grade 1 and 2, medial tibiofemoral compartment   | 6° full-length LWI                                                                                                           | bespoke unloader knee braces  | 6 weeks   |
| Jones 2013 <sup>34</sup>    | UK        | Medial compartment knee OA                                                                 | K/L grade 2 and 3, medial JSN                        | LWI: The heel was inclined at 5° with the inclination reduced to 0° at the 5th metatarsal head with a contoured arch profile | 6° valgus knee brace          | 2 weeks   |
| Khosravi 2019 <sup>35</sup> | Iran      | Medial compartment knee OA                                                                 | K/L grade 2 and 3                                    | Full length custom-made LWI; LWI+ knee brace                                                                                 | three-point valgus knee brace | 6 weeks   |

Knee osteoarthritis (KOA); Knee adduction moment (KAM); Knee adduction angular impulse (KAAI)

---

\* OA=osteoarthritis; LWI=lateral wedged insoles; VAS=visual analog scale; NRS=numerical rating scale; K/L=Kellgren/Lawrence; NR=not reported; JSN=joint space narrowing;

1  
2  
3  
4 **Tables**  
5  
6  
7  
8  
9  
10  
11  
12  
13  
14  
15  
16  
17  
18  
19  
20  
21  
22  
23  
24  
25  
26  
27  
28  
29  
30  
31  
32  
33  
34  
35  
36  
37  
38  
39  
40  
41  
42  
43  
44  
45  
46

For peer review only

Knee osteoarthritis (KOA); Knee adduction moment (KAM); Knee adduction angular impulse (KAAI)

**Table 1. Characteristics of included studies (2) \***

| Authors                          | Country   | Clinical criteria†                                                                                         | Radiographic features                                | Intervention                                                   | Comparisons                     | Follow up |
|----------------------------------|-----------|------------------------------------------------------------------------------------------------------------|------------------------------------------------------|----------------------------------------------------------------|---------------------------------|-----------|
| Hunt 2018 <sup>36</sup>          | US        | Medial compartment knee OA;<br>Pain ( $\geq 3$ of 10) longer than 6 months                                 | K/L grade $\geq 2$ , medial tibiofemoral compartment | Toe-out gait modification                                      | Walking without any guidance    | 4 months  |
| Lim 2008 <sup>38</sup>           | Australia | Medial compartment knee OA;<br>Medial knee pain                                                            | K/L grade $\geq 2$ , medial JSN                      | Quadriceps strengthening                                       | No intervention                 | 12 weeks  |
| Erhart-Hledik 2012 <sup>39</sup> | US        | Medial compartment knee OA;<br>Medial knee pain                                                            | K/L grade $\geq 1$                                   | Variable-stiffness shoe with stiffer soles on the lateral side | Constant-stiffness control shoe | 12 months |
| Bennell 2010 <sup>40</sup>       | Australia | Medial compartment knee OA;<br>Varus malalignment; Pain ( $> 3$ of 11 upon walking)                        | K/L grade $\geq 2$ , medial JSN                      | Hip strengthening                                              | No intervention                 | 13 weeks  |
| Cheung 2018 <sup>41</sup>        | China     | Medial compartment knee OA;<br>Knee pain occurred at least one day a week during each of the 8 weeks prior | K/L grade 1 and 2                                    | Gait retraining for KAM reduction                              | Walking without any guidance    | 6 weeks   |

\* OA=osteoarthritis; LWI=lateral wedged insoles; VAS=visual analog scale; NRS=numerical rating scale; K/L=Kellgren/Lawrence; NR=not reported; JSN=joint space narrowing;

Knee osteoarthritis (KOA); Knee adduction moment (KAM); Knee adduction angular impulse (KAAI)

**Table 1. Characteristics of included studies (3) \***

| Authors                                | Country   | Clinical criteria†                                                                      | Radiographic features                                   | Intervention           | Comparisons                 | Follow up |
|----------------------------------------|-----------|-----------------------------------------------------------------------------------------|---------------------------------------------------------|------------------------|-----------------------------|-----------|
| Foroughi 2011 <sup>42</sup>            | Australia | Primary knee OA                                                                         | K/L grade $\geq 1$                                      | Lower limb exercise    | Sham-exercise               | 6 months  |
| Bennell 2014 <sup>45</sup>             | Australia | Medial compartment knee OA;<br>Pain VAS ( $\geq 25$ of 100) over the<br>past week       | K/L grade $\geq 2$ , medial<br>tibiofemoral compartment | Neuromuscular exercise | Quadriceps<br>strengthening | 12 weeks  |
| Hunt 2013 <sup>46</sup>                | Canada    | Medial compartment knee OA;<br>Knee pain $> 3/10$ on most days of<br>the previous month | K/L grade $\geq 2$ , medial<br>tibiofemoral compartment | Lower limb exercise    | No intervention             | 11 weeks  |
| Holsgaard-Larsen<br>2017 <sup>47</sup> | Denmark   | Primary knee OA<br><br>Pain KOOS ( $< 80$ of 100, at<br>least mild pain)                | K/L grade $\leq 3$                                      | Neuromuscular exercise | Analgesic advice            | 8 weeks   |

\* OA=osteoarthritis; LWI=lateral wedged insoles; VAS=visual analog scale; NRS=numerical rating scale; K/L=Kellgren/Lawrence; NR=not reported; JSN=joint space narrowing;

Knee osteoarthritis (KOA); Knee adduction moment (KAM); Knee adduction angular impulse (KAAI)

| Authors                            | Country | Clinical criteria†                                                                      | Radiographic features | Intervention                                                                                                                                                              | Comparisons                                                             | Follow up |
|------------------------------------|---------|-----------------------------------------------------------------------------------------|-----------------------|---------------------------------------------------------------------------------------------------------------------------------------------------------------------------|-------------------------------------------------------------------------|-----------|
| Song 2020 <sup>49</sup>            | China   | Medial compartment knee OA in one or both legs.                                         | K/L grade $\leq 3$    | PNF (one-hour sessions three times a week)                                                                                                                                | Watch television or read magazines at the same time                     | 12 weeks  |
| Wang 2017 <sup>50</sup>            | China   | Medial compartment knee OA                                                              | K/L grade 2 and 3     | Acupuncture with 2 Hz continuous wave in Neixiyan (EX-LE 4), Dubi (ST 35), Yanglingquan (GB 34), Yinlingquan (SP 9), Xuehai (SP 10), Liangqiu (ST 34) and Zusanli (ST 36) | 2 cm next to the same acupoints with shallow acupuncture and no current | Immediate |
| Robert-Lachaine 2020 <sup>51</sup> | Canada  | Medial compartment knee OA; Pain > 31/100 on WOMAC; Varus knee alignment $\geq 2^\circ$ | K/L grade 2 and 3     | V3P-brace; VER-brace; ACL-brace (wear the brace as often as possible)                                                                                                     | /                                                                       | 3 months  |
| Trombini-Souza 2015 <sup>48</sup>  | Brazil  | Medial compartment knee OA; Knee pain between 3 and 8 on VAS                            | K/L grade 2 and 3     | Minimalist footwear (Moleca®)                                                                                                                                             | Standard, neutral tennis shoe                                           | 6 months  |

\* OA=osteoarthritis; LWI=lateral wedged insoles; VAS=visual analog scale; NRS=numerical rating scale; K/L=Kellgren/Lawrence; NR=not reported; JSN=joint space narrowing; PNF=Proprioceptive neuromuscular facilitation; V3P-brace= three-point bending system valgus knee brace; VER-brace= unloader brace with valgus and external rotation functions; ACL-brace= functional medial-lateral stabilization brace used after ligament injuries; The Moleca® shoe is a low-cost women's double canvas, flexible, flat, walking shoe without heels, with a 5-mm anti-slip rubber sole and a 3-mm flat insole of ethylene vinyl acetate that provides only protection but no correction of any kind.

Knee osteoarthritis (KOA); Knee adduction moment (KAM); Knee adduction angular impulse (KAAI)



**Table 2. Characteristics of participants in included studies (1) \***

| Authors                     | No. | Sex, M:F | Age, years | Height, meters | Body mass, kg | BMI, kg/m <sup>2</sup> | Bilateral knee<br>OA included | K/L grade, no. |    |    |    | Main<br>outcomes                                 |
|-----------------------------|-----|----------|------------|----------------|---------------|------------------------|-------------------------------|----------------|----|----|----|--------------------------------------------------|
|                             |     |          |            |                |               |                        |                               | 1              | 2  | 3  | 4  |                                                  |
| Barrios 2013 <sup>43</sup>  | 38  | NR       | 61.90±8.37 | NR             | NR            | 32.00±7.43             | NR                            | 0              | 17 | 14 | 7  | 1 <sup>st</sup> KAM;<br>KAAI                     |
| Hinman 2016 <sup>44</sup>   | 164 | 20:21    | 64.30±7.45 | 1.67 ± 0.10    | 82.95±14.76   | 29.70±3.64             | NR                            | 0              | 49 | 52 | 63 | 1 <sup>st</sup> KAM;<br>KAAI                     |
| Arazpour 2012 <sup>37</sup> | 24  | 3:4      | 59.29±2.37 | NR             | NR            | 27.01±1.71             | Yes                           | 9              | 15 | 0  | 0  | 1 <sup>st</sup> KAM                              |
| Jones 2013 <sup>34</sup>    | 28  | 4:3      | 66.30±8.20 | 1.75±0.13      | 88.7±15.10    | NR                     | No                            | 0              | 10 | 18 | 0  | 1 <sup>st</sup> and 2 <sup>nd</sup><br>KAM; KAAI |
| Khosravi 2019 <sup>35</sup> | 21  | 13:8     | 58.97±6.80 | 1.62±0.11      | 79.11±9.35    | NR                     | NR                            | 0              | 9  | 12 | 0  | 1 <sup>st</sup> KAM                              |

\* Values are the mean±SD unless indicated otherwise. BMI=body mass index; K/L=Kellgren/Lawrence; NR=not reported; JSN=joint space narrowing; KAM=knee adduction moment; KAAI=knee adduction angular impulse.

**Table 2. Characteristics of participants in included studies (2) \***

Knee osteoarthritis (KOA); Knee adduction moment (KAM); Knee adduction angular impulse (KAAI)

| Authors                             | No. | Sex, M:F | Age, years | Height, meters | Body mass, kg | BMI, kg/m <sup>2</sup> | Bilateral knee<br>OA included | K/L grade, no. |    |    |    | Main<br>outcomes                                 |
|-------------------------------------|-----|----------|------------|----------------|---------------|------------------------|-------------------------------|----------------|----|----|----|--------------------------------------------------|
|                                     |     |          |            |                |               |                        |                               | 1              | 2  | 3  | 4  |                                                  |
| Hunt 2018 <sup>36</sup>             | 79  | 24:55    | 64.99±8.60 | 1.65±0.10      | 74.59±13.15   | 27.35±3.48             | Yes                           | 0              | 37 | 31 | 11 | 1 <sup>st</sup> and 2 <sup>nd</sup><br>KAM; KAAI |
| Lim 2008 <sup>38</sup>              | 107 | 48:59    | 64.60±8.51 | 1.65±0.10      | 79.41±15.32   | 28.96±4.85             | Yes                           | 0              | 34 | 29 | 44 | 1 <sup>st</sup> KAM                              |
| Erhart-Hledik<br>2012 <sup>39</sup> | 79  | 41:38    | 61.70±9.43 | 1.69±0.08      | 79.50±15.07   | 27.51±4.87             | Yes                           | NR             | NR | NR | NR | 1 <sup>st</sup> KAM                              |
| Bennell 2010 <sup>40</sup>          | 89  | 46:43    | 64.55±8.34 | NR             | NR            | 27.94±4.41             | Yes                           | 0              | 30 | 29 | 30 | 1 <sup>st</sup> KAM;<br>KAAI                     |
| Cheung 2018 <sup>41</sup>           | 20  | 1:1      | 61.95±6.11 | 1.63±0.09      | 65.85±6.64    | 27.35±3.48             | NR                            | 5              | 15 | 0  | 0  | 1 <sup>st</sup> KAM                              |

\* Values are the mean±SD unless indicated otherwise. BMI=body mass index; K/L=Kellgren/Lawrence; NR=not reported; JSN=joint space narrowing; KAM=knee adduction moment; KAAI=knee adduction angular impulse.

**Table 2. Characteristics of participants in included studies (3) \***

Knee osteoarthritis (KOA); Knee adduction moment (KAM); Knee adduction angular impulse (KAAI)

| Authors                                | No. | Sex, M:F | Age, years | Height, meters | Body mass, kg | BMI, kg/m <sup>2</sup> | Bilateral knee<br>OA included | K/L grade, no. |    |    |    | Main<br>outcomes                           |
|----------------------------------------|-----|----------|------------|----------------|---------------|------------------------|-------------------------------|----------------|----|----|----|--------------------------------------------|
|                                        |     |          |            |                |               |                        |                               | 1              | 2  | 3  | 4  |                                            |
| Foroughi 2011 <sup>42</sup>            | 54  | 0:54     | 65.48±7.44 | NR             | 82.87±18.43   | 32.07±7.08             | Yes                           | 20             | 7  | 20 | 1  | 1 <sup>st</sup> and 2 <sup>nd</sup><br>KAM |
| Bennell 2014 <sup>45</sup>             | 100 | 48:52    | 62.45±7.32 | 1.67±0.10      | 82.70±14.29   | 29.65±4.08             | Yes                           | 0              | 22 | 43 | 35 | 1 <sup>st</sup> KAM;<br>KAAI               |
| Hunt 2013 <sup>46</sup>                | 17  | 8:9      | 66.10±11.3 | NR             | NR            | 27.00±4.50             | Yes                           | 0              | 10 | 5  | 2  | 1 <sup>st</sup> KAM;<br>KAAI               |
| Holsgaard-Larsen<br>2017 <sup>47</sup> | 93  | 39:54    | 58.10±7.96 | NR             | 79.64±12.49   | 26.90±3.09             | NR                            | 45             | 31 | 17 | 0  | 1 <sup>st</sup> KAM;<br>KAAI               |

\* Values are the mean±SD unless indicated otherwise. BMI=body mass index; K/L=Kellgren/Lawrence; NR=not reported; JSN=joint space narrowing; KAM=knee adduction moment; KAAI=knee adduction angular impulse.

**Table 2. Characteristics of participants in included studies (4) \***

Knee osteoarthritis (KOA); Knee adduction moment (KAM); Knee adduction angular impulse (KAAI)

| Authors                               | No. | Sex, M:F | Age, years | Height, meters | Body mass, kg | BMI, kg/m <sup>2</sup> | Bilateral knee<br>OA included | K/L grade, no. |    |    |   | Main<br>outcomes                                 |
|---------------------------------------|-----|----------|------------|----------------|---------------|------------------------|-------------------------------|----------------|----|----|---|--------------------------------------------------|
|                                       |     |          |            |                |               |                        |                               | 1              | 2  | 3  | 4 |                                                  |
| Song 2020 <sup>49</sup>               | 36  | 1:1      | 68.01±3.91 | 1.62±0.07      | 68.16±6.77    | NR                     | Yes                           | 9              | 20 | 7  | 0 | 1 <sup>st</sup> KAM                              |
| Wang 2017 <sup>50</sup>               | 36  | 1:5      | 63.50±7.95 | NR             | NR            | 23.75±2.66             | Yes                           | 0              | 19 | 17 | 0 | 1 <sup>st</sup> and 2 <sup>nd</sup><br>KAM       |
| Robert-Lachaine<br>2020 <sup>51</sup> | 24  | 7:5      | 57.20±8.60 | 1.68±0.09      | 89.30±18.70   | 31.40±5.00             | NR                            | 0              | 15 | 8  | 0 | 1 <sup>st</sup> and 2 <sup>nd</sup><br>KAM; KAAI |
| Trombini-Souza<br>2015 <sup>48</sup>  | 56  | NR       | 66.00±5.00 | 1.60±0.10      | 73.40±13.10   | NR                     | NR                            | 0              | NR | NR | 0 | 1 <sup>st</sup> KAM;<br>KAAI                     |

\* Values are the mean±SD unless indicated otherwise. BMI=body mass index; K/L=Kellgren/Lawrence; NR=not reported; JSN=joint space narrowing; KAM=knee adduction moment; KAAI=knee adduction angular impulse.

|          |                      |                      |   |                      |                                   |   |                      |                                   |                      |
|----------|----------------------|----------------------|---|----------------------|-----------------------------------|---|----------------------|-----------------------------------|----------------------|
| <b>J</b> | 0.41<br>(-0.66,1.49) | 0.16<br>(-0.46,0.79) | - | 0.20<br>(-0.23,0.64) | <b>0.81</b><br><b>(0.17,1.45)</b> | - | 0.30<br>(-0.61,1.21) | <b>0.54</b><br><b>(0.02,1.07)</b> | 0.32<br>(-0.10,0.75) |
|----------|----------------------|----------------------|---|----------------------|-----------------------------------|---|----------------------|-----------------------------------|----------------------|

Knee osteoarthritis (KOA); Knee adduction moment (KAM); Knee adduction angular impulse (KAAI)

|                                      |                                      |                                      |                                   |                                   |                                      |                       |                       |                       |                                      |
|--------------------------------------|--------------------------------------|--------------------------------------|-----------------------------------|-----------------------------------|--------------------------------------|-----------------------|-----------------------|-----------------------|--------------------------------------|
| 0.28<br>(-0.34,0.89)                 | <b>I</b>                             | -0.25<br>(-1.33,0.84)                | -                                 | -0.21<br>(-1.37,0.95)             | 0.40<br>(-0.70,1.49)                 | -                     | -0.12<br>(-1.39,1.16) | 0.13<br>(-0.90,1.16)  | -0.09<br>(-1.08,0.90)                |
| 0.07<br>(-0.50,0.64)                 | -0.21<br>(-0.89,0.47)                | <b>H</b>                             | -                                 | 0.04<br>(-0.72,0.80)              | 0.64<br>(-0.01,1.30)                 | -                     | 0.13<br>(-0.79,1.05)  | 0.38<br>(-0.16,0.92)  | 0.16<br>(-0.29,0.61)                 |
| <b>-0.69</b><br><b>(-1.36,-0.02)</b> | <b>-0.97</b><br><b>(-1.73,-0.21)</b> | <b>-0.76</b><br><b>(-1.49,-0.03)</b> | <b>G</b>                          | -                                 | -                                    | -                     | -                     | -                     | -                                    |
| 0.24<br>(-0.11,0.59)                 | -0.04<br>(-0.64,0.57)                | 0.17<br>(-0.39,0.74)                 | <b>0.93</b><br><b>(0.27,1.60)</b> | <b>F</b>                          | 0.61<br>(-0.17,1.38)                 | -                     | 0.09<br>(-0.91,1.10)  | 0.34<br>(-0.34,1.02)  | 0.12<br>(-0.49,0.73)                 |
| <b>0.89</b><br><b>(0.35,1.44)</b>    | 0.62<br>(-0.04,1.28)                 | <b>0.83</b><br><b>(0.20,1.45)</b>    | <b>1.59</b><br><b>(0.87,2.30)</b> | <b>0.65</b><br><b>(0.11,1.19)</b> | <b>E</b>                             | -                     | -0.51<br>(-1.45,0.42) | -0.27<br>(-0.83,0.30) | <b>-0.48</b><br><b>(-0.96,-0.01)</b> |
| <b>1.28</b><br><b>(0.21,2.36)</b>    | 1.01<br>(-0.13,2.14)                 | <b>1.22</b><br><b>(0.10,2.33)</b>    | <b>1.98</b><br><b>(0.81,3.15)</b> | 1.04<br>(-0.03,2.11)              | 0.39<br>(-0.71,1.49)                 | <b>D</b>              | -                     | -                     | -                                    |
| <b>0.78</b><br><b>(0.11,1.45)</b>    | 0.50<br>(-0.26,1.27)                 | 0.71<br>(-0.02,1.44)                 | <b>1.47</b><br><b>(0.66,2.29)</b> | 0.54<br>(-0.12,1.20)              | -0.11<br>(-0.83,0.60)                | -0.50<br>(-1.46,0.46) | <b>C</b>              | 0.25<br>(-0.50,0.99)  | 0.03<br>(-0.77,0.83)                 |
| <b>0.56</b><br><b>(0.10,1.02)</b>    | 0.29<br>(-0.30,0.87)                 | 0.49<br>(-0.05,1.04)                 | <b>1.26</b><br><b>(0.61,1.90)</b> | 0.32<br>(-0.13,0.77)              | -0.33<br>(-0.85,0.19)                | -0.72<br>(-1.70,0.25) | -0.22<br>(-0.71,0.27) | <b>B</b>              | -0.22<br>(-0.52,0.08)                |
| <b>0.37</b><br><b>(0.02,0.71)</b>    | 0.09<br>(-0.42,0.60)                 | 0.30<br>(-0.15,0.75)                 | <b>1.06</b><br><b>(0.49,1.63)</b> | 0.13<br>(-0.21,0.46)              | <b>-0.53</b><br><b>(-0.95,-0.10)</b> | -0.92<br>(-1.94,0.10) | -0.41<br>(-0.99,0.16) | -0.19<br>(-0.49,0.10) | <b>A</b>                             |

**Table 3.** Detailed results of network meta-analysis for the First peak KAM (grey) and KAAI (white). Data are SMDs (from the top left to the bottom right, higher comparator versus lower comparator) and their related 95%CI. Bold texts in the table mean SMDs are statistically significant.

A= Standard care; B= Lateral Wedge Insole; C= Knee Brace; D= Lateral Wedge Insole+ Knee Brace; E= Gait retraining; F= Quadriceps strengthening; G= Variable-stiffness shoe; H= Hip strengthening; I= Lower limb exercise; J= Neuromuscular exercise.

## Box

Knee osteoarthritis (KOA); Knee adduction moment (KAM); Knee adduction angular impulse (KAAI)

**Box 1. Inclusion criteria**

## Design

- Randomised controlled trial

## Participants

- People with radiologically confirmed knee osteoarthritis

## Intervention

- Manual therapy
- Aerobic exercise
- Pulsed electrical stimulation (PES)
- Acupuncture
- Knee braces
- Ice/cooling treatment
- Pulsed electromagnetic fields (PEMF)
- Balneotherapy
- Interferential therapy
- Transcutaneous electric Nerve stimulation (TENS)
- Heat treatment
- Foot orthoses
- Laser/light therapy
- Muscle-strengthening exercise
- Static magnets
- Tai Chi
- Athletic tape
- Neuromuscular electrical stimulation (NMES)

## Comparator

- Control group (standard/conventional care, placebo intervention, no intervention, sham-exercise, analgesic advice and education)

## Outcome measures

- KAM and KAAI.

## Comparisons

- All interventions compared to the comparator and to each other

Knee osteoarthritis (KOA); Knee adduction moment (KAM); Knee adduction angular impulse (KAAI)

**Figure Legends**

**Figure 1. Flow chart of the study selection**

**Figure 2. Rankings for effects on First peak KAM. Graph displays distribution of probabilities for each treatment. X-axis represents the possible rank of each treatment (from the best to worst according to the outcomes), Y-axis represents the cumulative probability for each treatment to be the best option, among the best two options, among the best three options, and so on. A= Standard care; B= Lateral Wedge Insole; C= Knee Brace; D= Lateral Wedge Insole+ Knee Brace; E= Gait retraining; F= Quadriceps strengthening; G= Variable-stiffness shoe; H= Hip strengthening; I= Lower limb exercise; J= Neuromuscular exercise.**

**Figure 3. Rankings for effects on KAAI. Graph displays distribution of probabilities for each treatment. X-axis represents the possible rank of each treatment (from the best to worst according to the outcomes), Y-axis represents the cumulative probability for each treatment to be the best option, among the best two options, among the best three options, and so on. A= Standard care; B= Lateral Wedge Insole; C= Knee Brace; E= Gait retraining; F= Quadriceps strengthening; H= Hip strengthening; I= Lower limb exercise; J= Neuromuscular exercise.**

**Figure 4. Risk of bias summary**

For peer review only

Knee osteoarthritis (KOA); Knee adduction moment (KAM); Knee adduction angular impulse (KAAI)

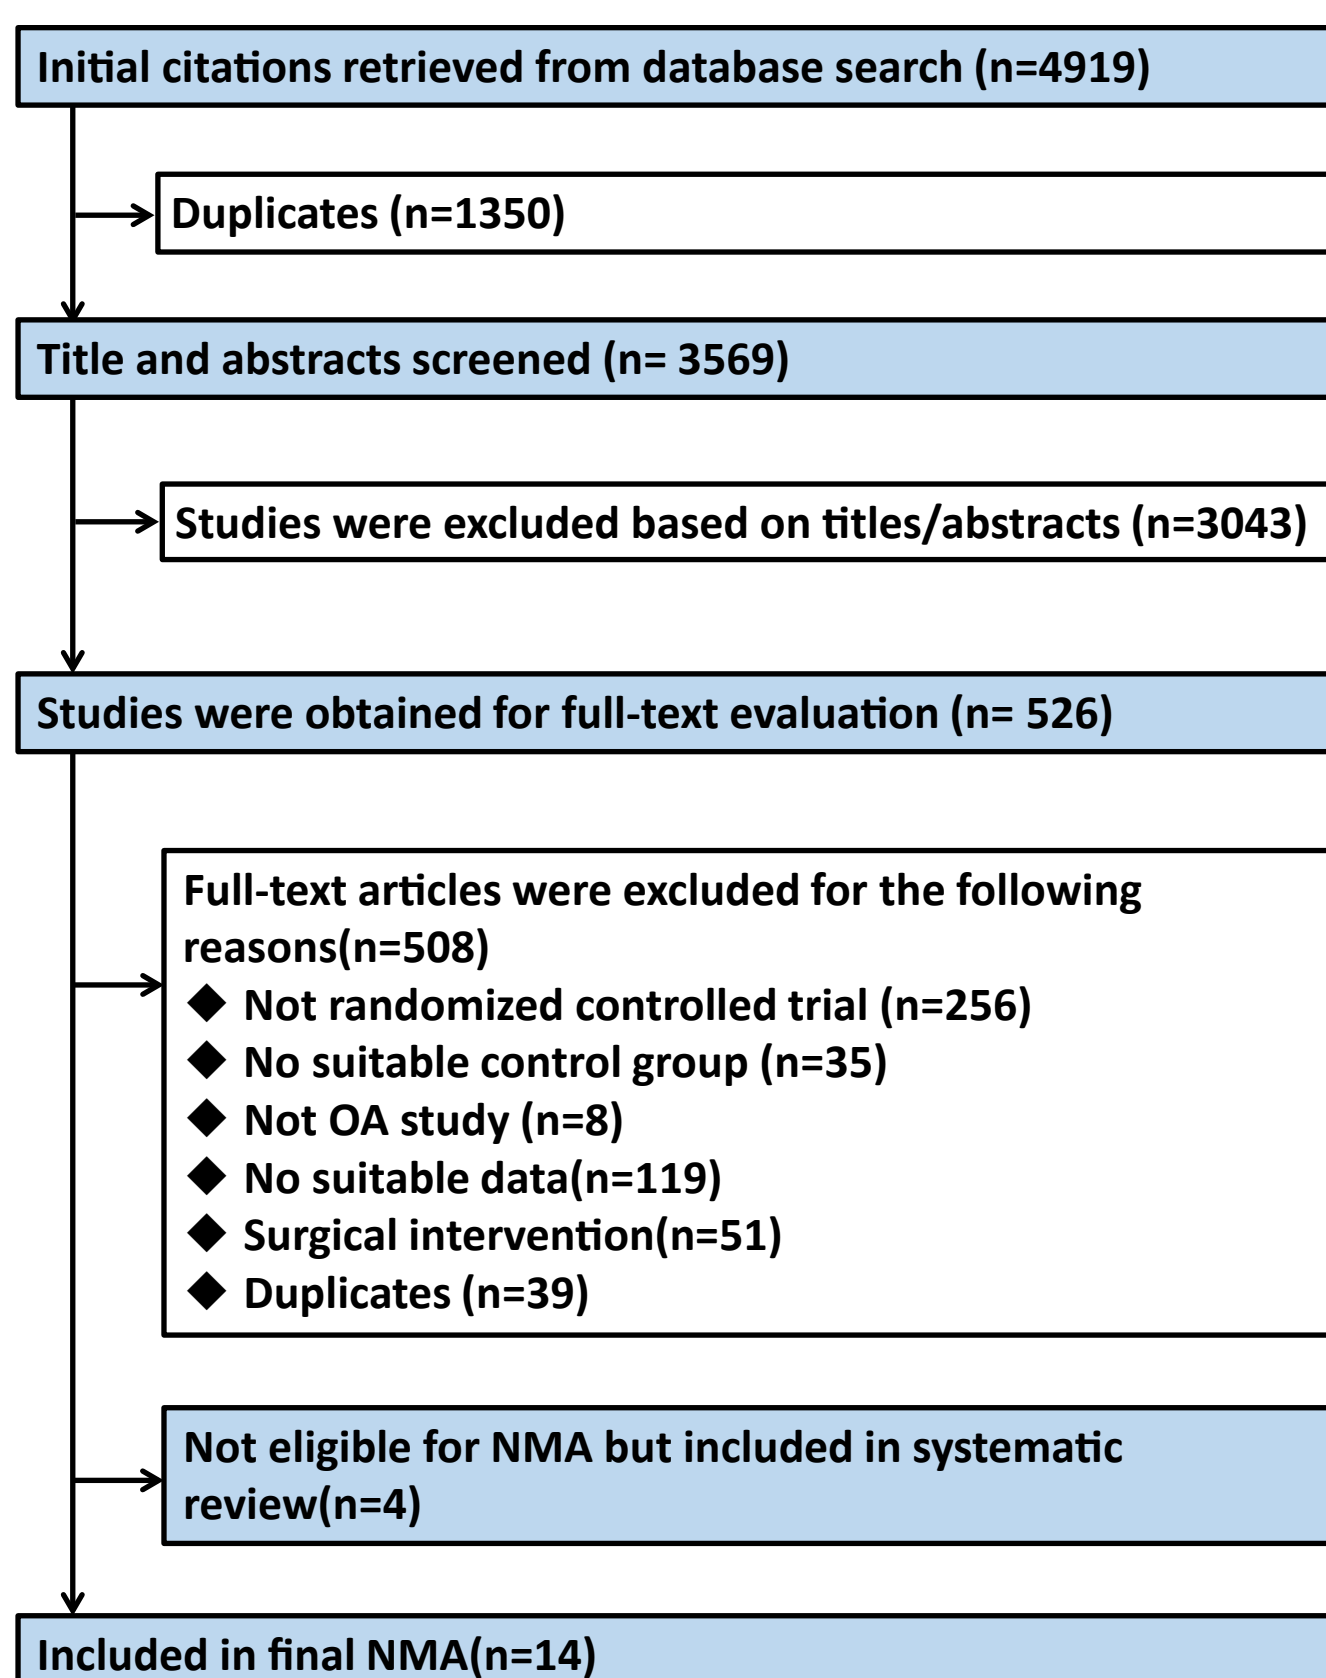

For peer review only



1  
2  
3  
4  
5  
6  
7  
8  
9  
10  
11  
12  
13  
14  
15  
16  
17  
18  
19  
20  
21  
22  
23  
24  
25  
26  
27  
28  
29  
30  
31  
32  
33  
34  
35  
36  
37  
38  
39  
40  
41  
42  
43  
44  
45  
46  
47  
48  
49  
50  
51  
52  
53  
54  
55  
56  
57  
58  
59  
60

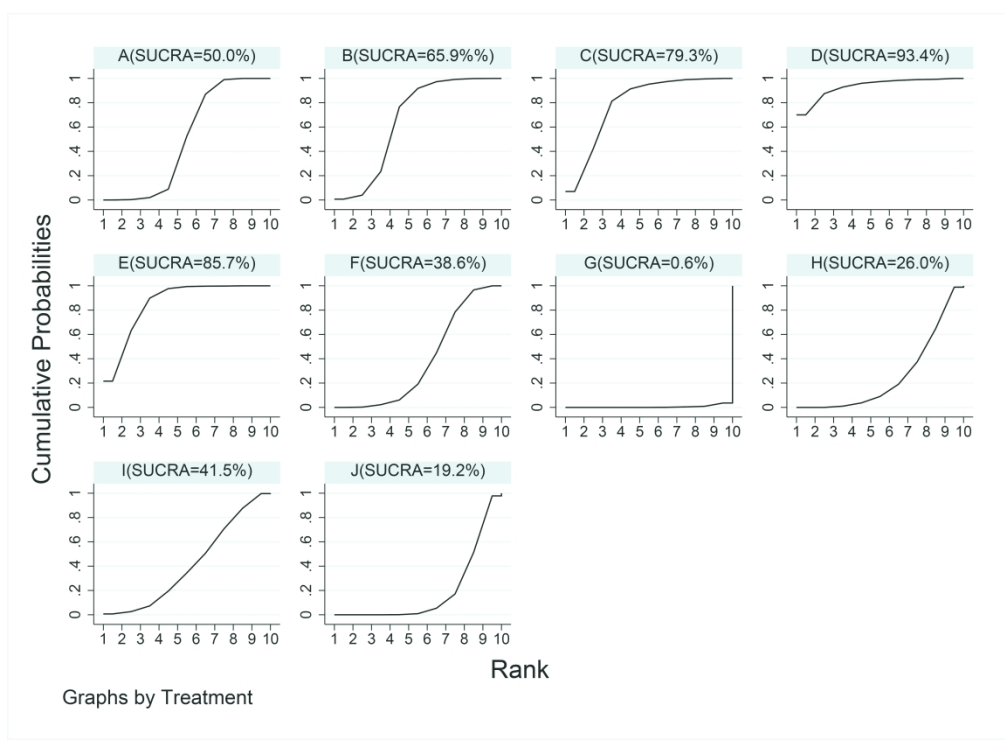

Figure 2

1  
2  
3  
4  
5  
6  
7  
8  
9  
10  
11  
12  
13  
14  
15  
16  
17  
18  
19  
20  
21  
22  
23  
24  
25  
26  
27  
28  
29  
30  
31  
32  
33  
34  
35  
36  
37  
38  
39  
40  
41  
42  
43  
44  
45  
46  
47  
48  
49  
50  
51  
52  
53  
54  
55  
56  
57  
58  
59  
60

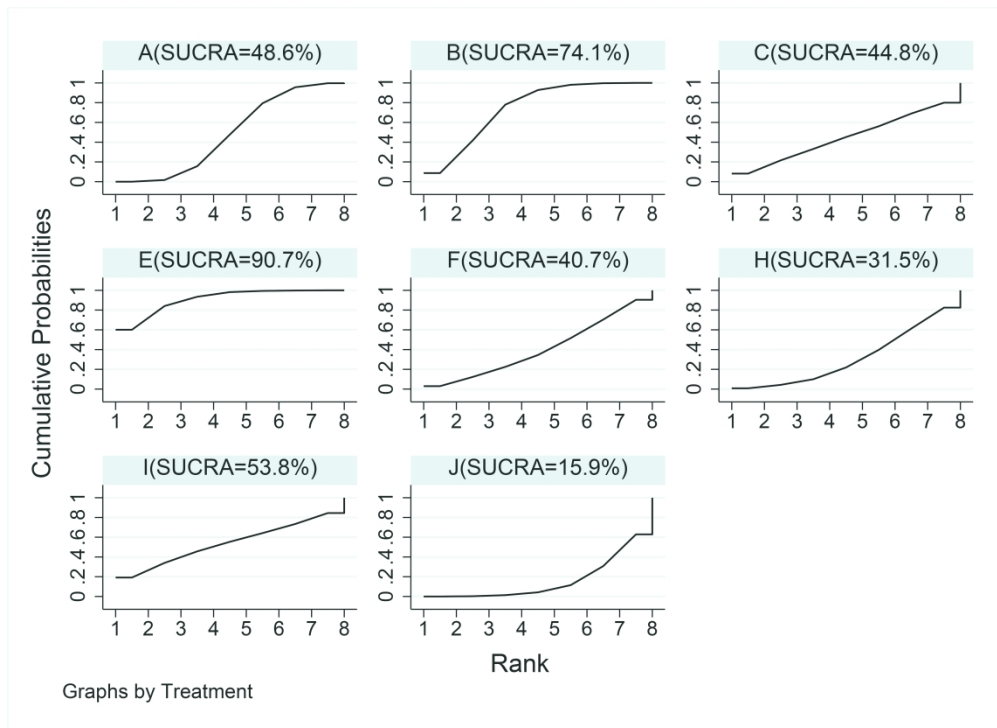

Figure 3

| Study ID              | Randomization process | Deviations from intended i | Missing outcome data | Measurement of the outcome | Selection of the reported | Overall |
|-----------------------|-----------------------|----------------------------|----------------------|----------------------------|---------------------------|---------|
| Arazpour 2012         | ?                     | ?                          | ?                    | +                          | +                         | !       |
| Barrios 2013          | ?                     | +                          | +                    | +                          | +                         | !       |
| Bennell 2010          | +                     | +                          | +                    | +                          | +                         | +       |
| Bennell 2014          | +                     | +                          | ?                    | +                          | +                         | ?       |
| Cheung 2018           | ?                     | ?                          | ?                    | +                          | ?                         | ?       |
| Erhart-Hledik 2012    | ?                     | +                          | ?                    | +                          | ?                         | ?       |
| Foroughi 2011         | ?                     | +                          | ?                    | +                          | +                         | ?       |
| Hinman 2016           | ?                     | +                          | ?                    | +                          | +                         | !       |
| Holsgaard-Larsen 2017 | +                     | +                          | +                    | +                          | +                         | +       |
| Hunt 2013             | +                     | +                          | +                    | +                          | ?                         | !       |
| Hunt 2018             | ?                     | ?                          | +                    | +                          | ?                         | ?       |
| Jones 2013            | ?                     | ?                          | ?                    | +                          | ?                         | ?       |
| Khosravi 2019         | ?                     | ?                          | ?                    | ?                          | ?                         | !       |
| Lim 2008              | +                     | ?                          | ?                    | +                          | ?                         | ?       |
| Robert-Lachaine 2020  | ?                     | ?                          | +                    | +                          | +                         | ?       |
| Song 2020             | ?                     | ?                          | ?                    | +                          | ?                         | ?       |
| Trombini-Souza 2015   | ?                     | +                          | +                    | +                          | +                         | !       |
| Wang 2017             | +                     | ?                          | +                    | +                          | ?                         | ?       |

1  
2  
3  
4  
5  
6  
7  
8  
9  
10  
11  
12  
13  
14  
15  
16  
17  
18  
19  
20  
21  
22  
23  
24  
25  
26  
27  
28  
29  
30  
31  
32  
33  
34  
35  
36  
37  
38  
39  
40  
41  
42  
43  
44  
45  
46  
47  
48  
49  
50  
51  
52  
53  
54  
55  
56  
57  
58  
59  
60

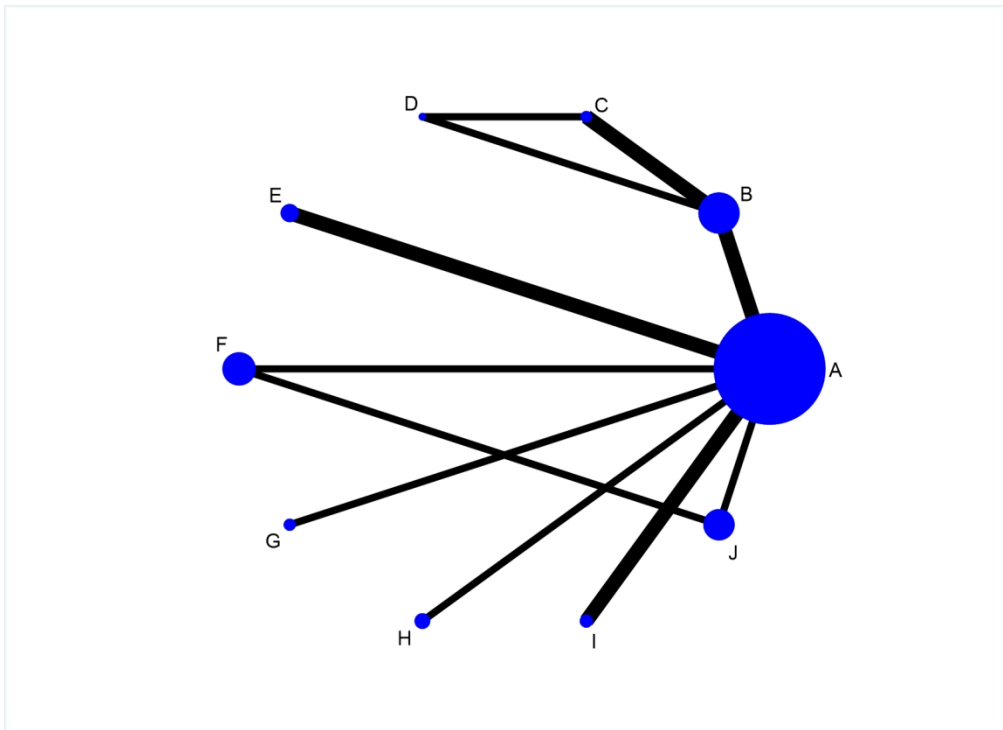

349x254mm (120 x 120 DPI)

1  
2  
3  
4  
5  
6  
7  
8  
9  
10  
11  
12  
13  
14  
15  
16  
17  
18  
19  
20  
21  
22  
23  
24  
25  
26  
27  
28  
29  
30  
31  
32  
33  
34  
35  
36  
37  
38  
39  
40  
41  
42  
43  
44  
45  
46  
47  
48  
49  
50  
51  
52  
53  
54  
55  
56  
57  
58  
59  
60

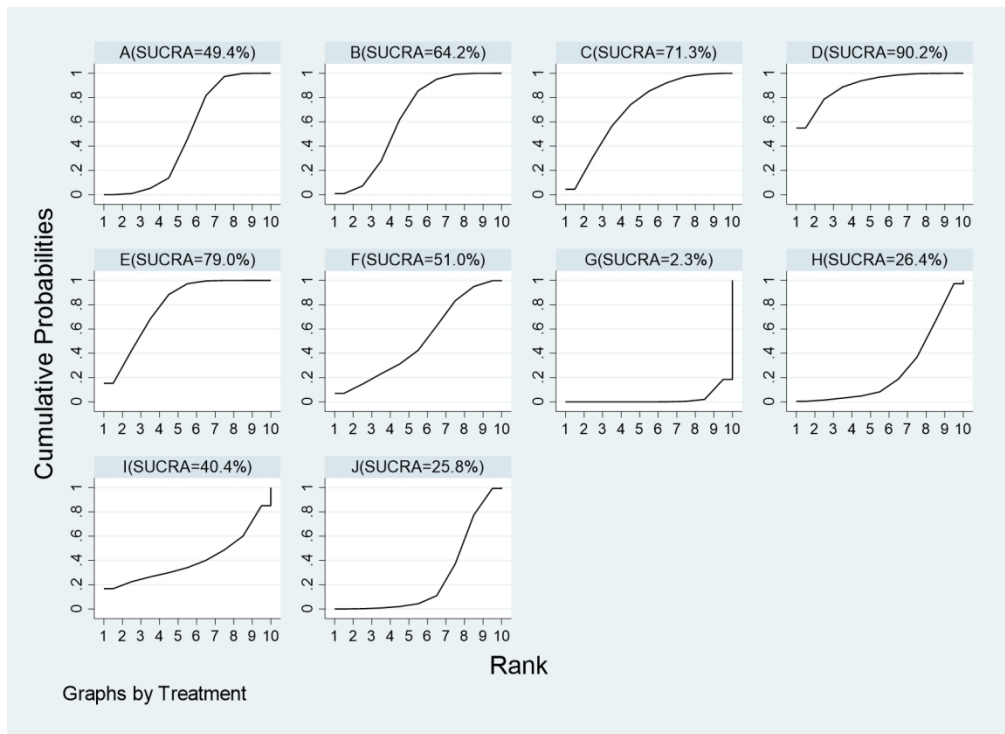

349x254mm (120 x 120 DPI)

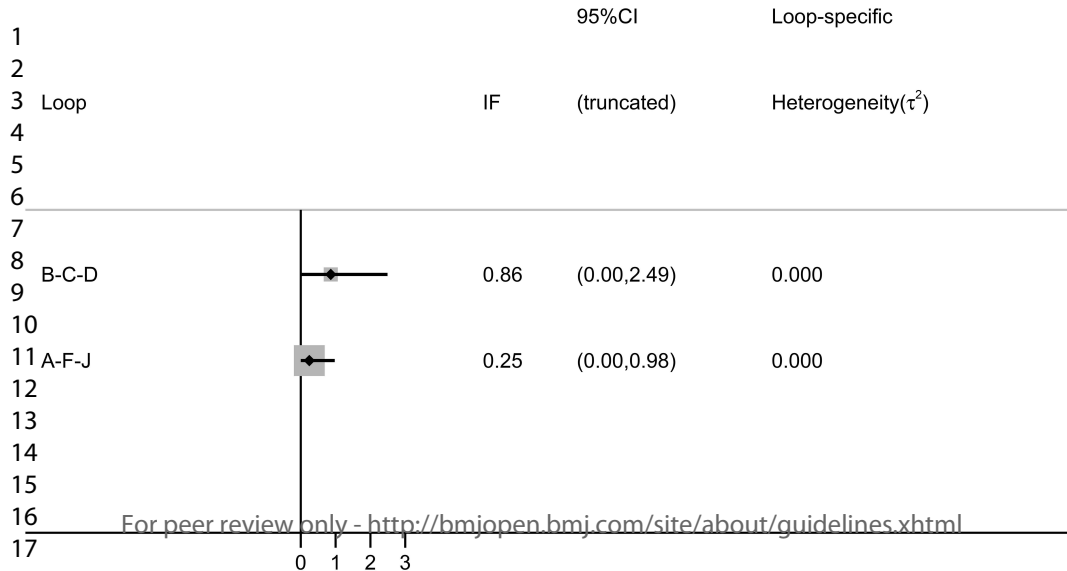

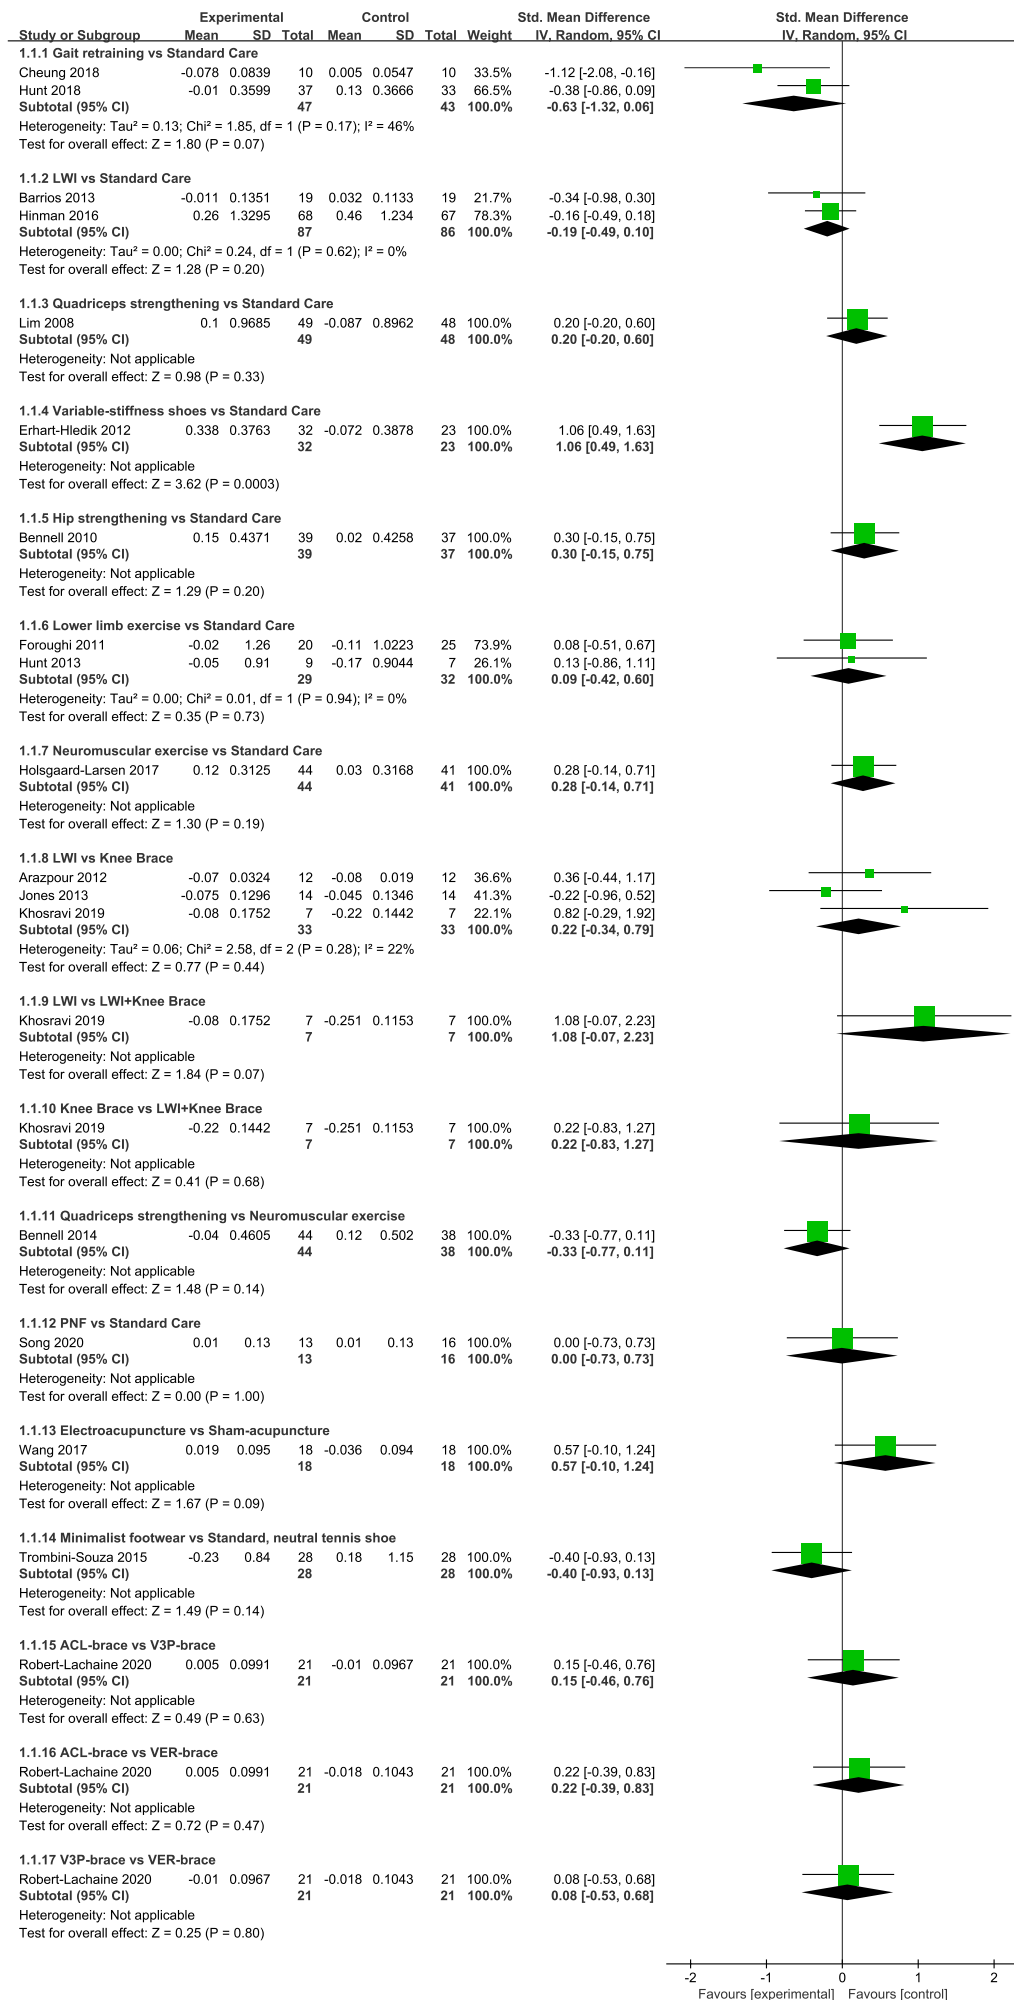

1  
2  
3  
4  
5  
6  
7  
8  
9  
10  
11  
12  
13  
14  
15  
16  
17  
18  
19  
20  
21  
22  
23  
24  
25  
26  
27  
28  
29  
30  
31  
32  
33  
34  
35  
36  
37  
38  
39  
40  
41  
42  
43  
44  
45  
46  
47  
48  
49  
50  
51  
52  
53  
54  
55  
56  
57  
58  
59  
60

For peer review only



1  
2  
3  
4  
5  
6  
7  
8  
9  
10  
11  
12  
13  
14  
15  
16  
17  
18  
19  
20  
21  
22  
23  
24  
25  
26  
27  
28  
29  
30  
31  
32  
33  
34  
35  
36  
37  
38  
39  
40  
41  
42  
43  
44  
45  
46  
47  
48  
49  
50  
51  
52  
53  
54  
55  
56  
57  
58  
59  
60

For peer review only

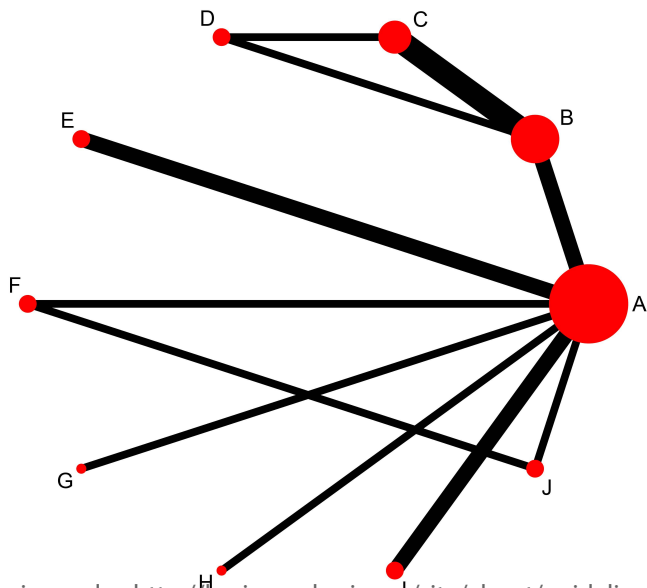

For peer review only - <http://bmjopen.bmj.com/site/about/guidelines.xhtml>

1  
2  
3  
4  
5  
6  
7  
8  
9  
10  
11  
12  
13  
14  
15  
16  
17  
18  
19  
20

1  
2  
3  
4  
5  
6  
7  
8  
9  
10  
11  
12  
13  
14  
15  
16  
17  
18  
19  
20

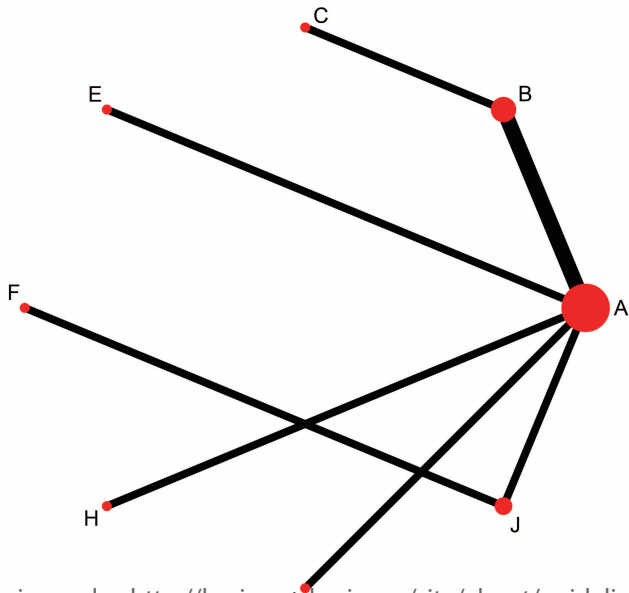

For peer review only - <http://bmjopen.bmj.com/site/about/guidelines.xhtml>

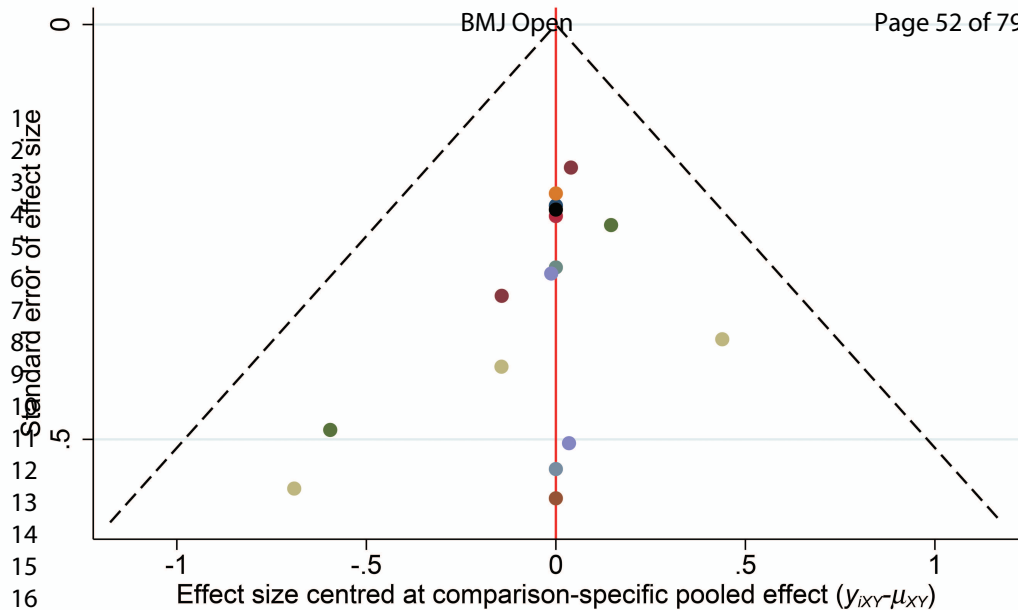

For peer review only - <http://bmjopen.bmj.com/site/about/guidelines.xhtml>

● A vs J   
 ● A vs B   
 ● A vs E   
 ● A vs F   
 ● A vs G   
 ● A vs H  
● A vs I   
● B vs C   
● B vs D   
● C vs D   
● F vs J

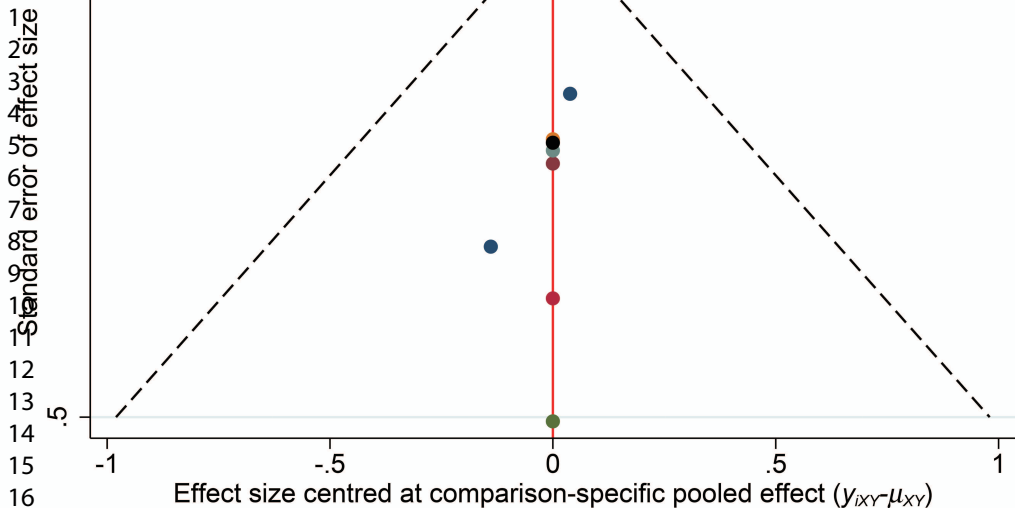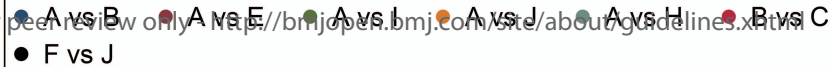

## Appendix

|                                                                                              |    |
|----------------------------------------------------------------------------------------------|----|
| Appendix 1 Search strategies .....                                                           | 2  |
| Appendix 2 Results of re-analysis.....                                                       | 4  |
| Appendix 3 Results of Inconsistency .....                                                    | 10 |
| Appendix 4 Conventional meta-analyses results .....                                          | 7  |
| Appendix 5 Network Diagram.....                                                              | 15 |
| Appendix 6 Table of GRADE .....                                                              | 11 |
| Appendix 7 Comparison-adjusted funnel plot for each outcome from the network meta-analysis.. | 4  |

## Appendix 1 Search strategies

### Search strategies for randomized controlled trials

#### Pubmed

1. (((((((("Osteoarthritis, Knee"[Mesh]) OR Knee Osteoarthritis[Title/Abstract]) OR Knee Osteoarthritis[Title/Abstract]) OR Osteoarthritis of Knee[Title/Abstract]) OR Osteoarthritis of the Knee[Title/Abstract]))) AND (((((((((((("Physical Therapy Modalities"[Mesh]) OR (Modalities, Physical Therapy[Title/Abstract]) OR (Modality, Physical Therapy[Title/Abstract]) OR (Physical Therapy Modality[Title/Abstract]) OR (Physiotherapy (Techniques)[Title/Abstract]) OR (Physiotherapies (Techniques)[Title/Abstract]) OR (Physical Therapy Techniques[Title/Abstract]) OR (Physical Therapy Technique[Title/Abstract]) OR (Techniques, Physical Therapy[Title/Abstract]) OR (Group Physiotherapy[Title/Abstract]) OR (Group Physiotherapies[Title/Abstract]) OR (Physiotherapies, Group[Title/Abstract]) OR (Physiotherapy, Group[Title/Abstract]) OR (Neurological Physiotherapy[Title/Abstract]) OR (Physiotherapy, Neurological[Title/Abstract]) OR (Neurophysiotherapy[Title/Abstract])
2. (((((((("Osteoarthritis, Knee"[Mesh]) OR Knee Osteoarthritis[Title/Abstract]) OR Knee Osteoarthritis[Title/Abstract]) OR Osteoarthritis of Knee[Title/Abstract]) OR Osteoarthritis of the Knee[Title/Abstract]))) AND (((("Orthopedic Equipment"[Mesh]) OR (Equipment, Orthopedic[Title/Abstract]) OR (Equipments, Orthopedic[Title/Abstract]) OR (Orthopedic Equipments[Title/Abstract]))

#### Embase

1. ('physiotherapy'/exp OR 'physical therapy':ab,ti OR 'physical therapy (speciality)':ab,ti OR 'physical therapy (specialty)':ab,ti OR 'physical therapy modalities ':ab,ti OR 'physical therapy service':ab,ti OR 'physical therapy speciality':ab,ti OR 'physical therapy specialty ':ab,ti OR 'physical treatment':ab,ti OR ' physio therapy ':ab,ti OR 'physical therapy techniques':ab,ti OR 'physical treatment':ab,ti OR 'physiotherapy department':ab,ti OR 'therapy, physical':ab,ti) AND ('knee osteoarthritis'/exp OR 'arthrosis, knee':ab,ti OR 'femorotibial arthrosis':ab,ti OR 'gonarthrosis':ab,ti OR 'knee arthrosis':ab,ti OR 'knee joint arthrosis':ab,ti OR 'knee joint osteoarthritis':ab,ti OR 'knee osteo-arthritis':ab,ti OR 'knee osteo-arthritis':ab,ti OR 'knee osteoarthrosis':ab,ti OR 'osteoarthritis, knee':ab,ti OR 'osteoarthrosis, knee':ab,ti)
2. ('orthosis'/exp OR 'device, orthotic':ab,ti OR 'devices, orthotic':ab,ti OR 'orthesis':ab,ti OR 'orthoepadic support device':ab,ti OR 'orthopedic support device':ab,ti OR 'orthoses':ab,ti OR 'orthotic device (physical object)':ab,ti OR 'orthotic devices':ab,ti) AND ('knee osteoarthritis'/exp OR 'arthrosis, knee':ab,ti OR 'femorotibial arthrosis':ab,ti OR 'gonarthrosis':ab,ti OR 'knee arthrosis':ab,ti OR 'knee joint arthrosis':ab,ti OR 'knee joint osteoarthritis':ab,ti OR 'knee osteo-arthritis':ab,ti OR 'knee osteo-arthritis':ab,ti OR 'knee osteoarthrosis':ab,ti OR 'osteoarthritis, knee':ab,ti OR 'osteoarthrosis, knee':ab,ti)

#### Web of Science

1. AB=(physical therapy OR physiotherapy OR physio therapy OR physical treatment OR physiotherapy department OR physical therapy techniques)
2. TI=(physical therapy OR physiotherapy OR physio therapy OR physical treatment OR physiotherapy department OR physical therapy techniques)
3. AB=(orthosis OR device OR orthosis OR orthoses OR orthopaedic support device OR orthotic device)
4. TI=(orthosis OR device OR orthosis OR orthoses OR orthopaedic support device OR orthotic device)
5. #4 OR #3 OR #2 OR #1
6. AB=(knee osteoarthritis OR femorotibial arthrosis OR gonarthrosis OR knee arthrosis OR knee osteo-arthritis OR knee osteoarthritis OR osteoarthritis)
7. TI=(knee osteoarthritis OR femorotibial arthrosis OR gonarthrosis OR knee arthrosis OR knee osteo-arthritis OR knee osteoarthritis OR osteoarthritis)
8. #6 OR #7
9. #8 AND #5

#### **Cochrane Library**

1. (MeSH descriptor: [Physical Therapy Modalities] explode all trees OR (Neurological Physiotherapy):ti,ab,kw OR (Physiotherapy, Neurological):ti,ab,kw OR (Neurophysiotherapy):ti,ab,kw OR (Techniques, Physical Therapy):ti,ab,kw OR (Physiotherapies (Techniques)):ti,ab,kw OR (Physical Therapy Techniques):ti,ab,kw OR (Physiotherapy (Techniques)):ti,ab,kw OR (Modality, Physical Therapy):ti,ab,kw OR (Physical Therapy Modality):ti,ab,kw OR (Physical Therapy Technique):ti,ab,kw OR (Modalities, Physical Therapy):ti,ab,kw OR (Group Physiotherapies):ti,ab,kw OR (Physiotherapy, Group):ti,ab,kw OR (Group Physiotherapy):ti,ab,kw OR (Physiotherapies, Group):ti,ab,kw) AND ((Osteoarthritis of Knee):ti,ab,kw OR (Knee Osteoarthritis):ti,ab,kw OR (Knee Osteoarthritis):ti,ab,kw OR (Knee Osteoarthritis of the Knee):ti,ab,kw) OR MeSH descriptor: [Osteoarthritis, Knee] explode all trees)
2. (MeSH descriptor: [Orthopedic Equipment] explode all trees OR (Orthopedic Equipments):ti,ab,kw OR (Equipment, Orthopedic):ti,ab,kw OR (Equipments, Orthopedic):ti,ab,kw) AND ((Osteoarthritis of Knee):ti,ab,kw OR (Knee Osteoarthritis):ti,ab,kw OR (Knee Osteoarthritis):ti,ab,kw OR (Knee Osteoarthritis of the Knee):ti,ab,kw) OR MeSH descriptor: [Osteoarthritis, Knee] explode all trees)

#### **MEDLINE**

1. (knee osteoarthritis) OR (femorotibial arthrosis) OR (gonarthrosis) OR (knee arthrosis) OR (knee osteo-arthritis) OR (knee osteoarthritis) OR (osteoarthritis)
2. (physical therapy) OR (physiotherapy) OR (physio therapy) OR (physical treatment) OR (physiotherapy department) OR (physical therapy techniques)
3. (orthotic devices) OR (Orthopedic Equipment) OR (orthosis) OR (device) OR (orthosis) OR (orthoses) OR (orthopaedic support device)
4. #2 OR #3



1  
2  
3  
4  
5  
6  
7  
8  
9  
10  
11  
12  
13  
14  
15  
16  
17  
18  
19  
20  
21  
22  
23  
24  
25  
26  
27  
28  
29  
30  
31  
32  
33  
34  
35  
36  
37  
38  
39  
40  
41  
42  
43  
44  
45  
46  
47  
48  
49  
50  
51  
52  
53  
54  
55  
56  
57  
58  
59  
60

5. #1 AND #4

## Appendix 2 Results of re-analysis

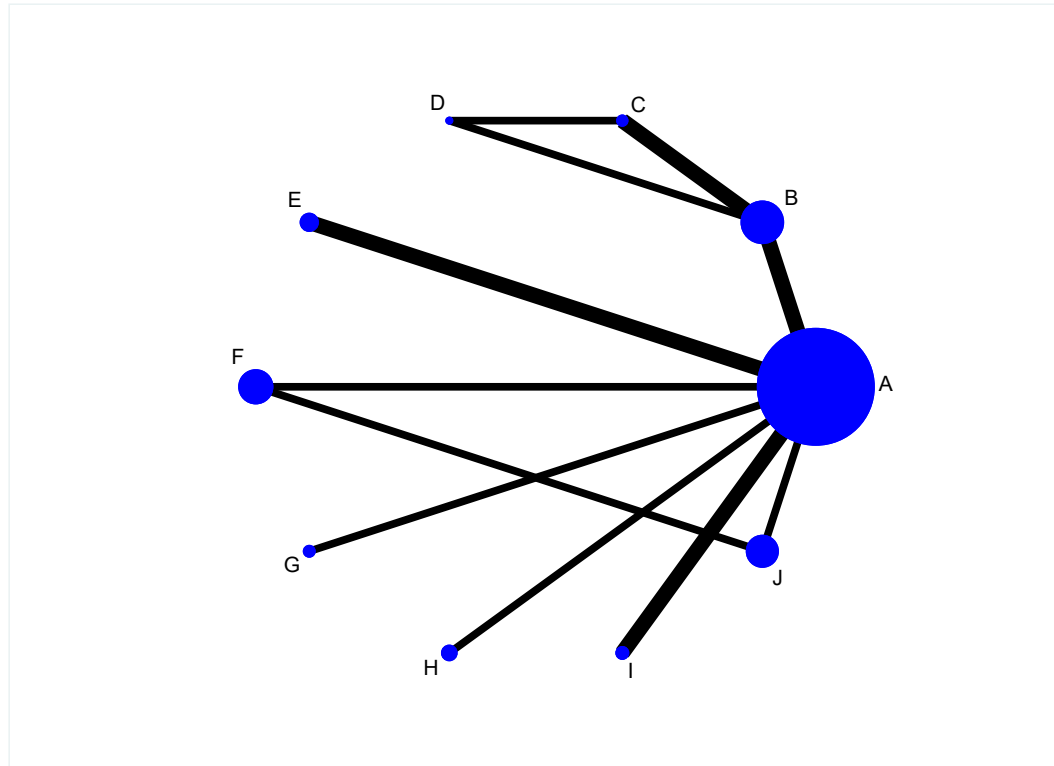

eFigure 1. Structure of network formed by interventions and their direct comparisons on First peak KAM (re-analysis). A= Standard care; B= Lateral Wedge Insole; C= Knee Brace; D= Lateral Wedge Insole+ Knee Brace; E= Gait retraining; F= Quadriceps strengthening; G= Variable-stiffness shoe; H= Hip strengthening; I= Lower limb exercise; J= Neuromuscular exercise.

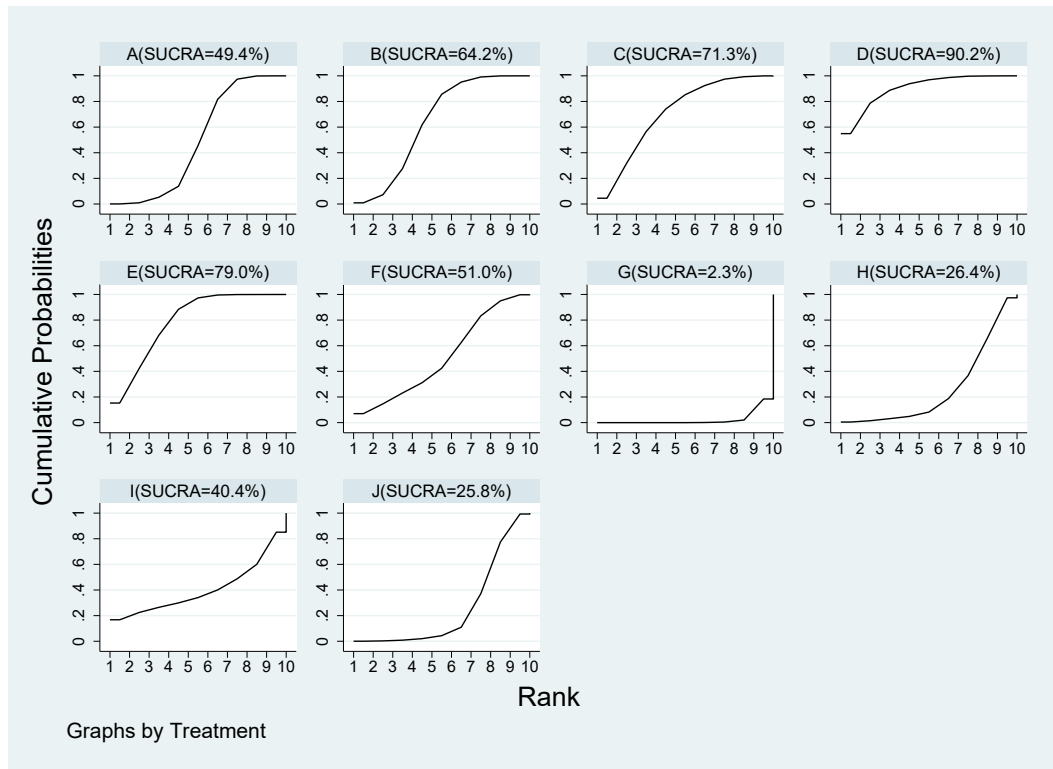

Figure 2. Rankings for effects on First peak KAM (re-analysis). Graph displays distribution of probabilities for each treatment. X-axis represents the possible rank of each treatment (from the best to worst according to the outcomes), Y-axis represents the cumulative probability for each treatment to be the best option, among the best two options, among the best three options, and so on. A= Standard care; B= Lateral Wedge Insole; C= Knee Brace; D= Lateral Wedge Insole+ Knee Brace; E= Gait retraining; F= Quadriceps strengthening; G= Variable-stiffness shoe; H= Hip strengthening; I= Lower limb exercise; J= Neuromuscular exercise.

### Appendix 3 Results of Inconsistency

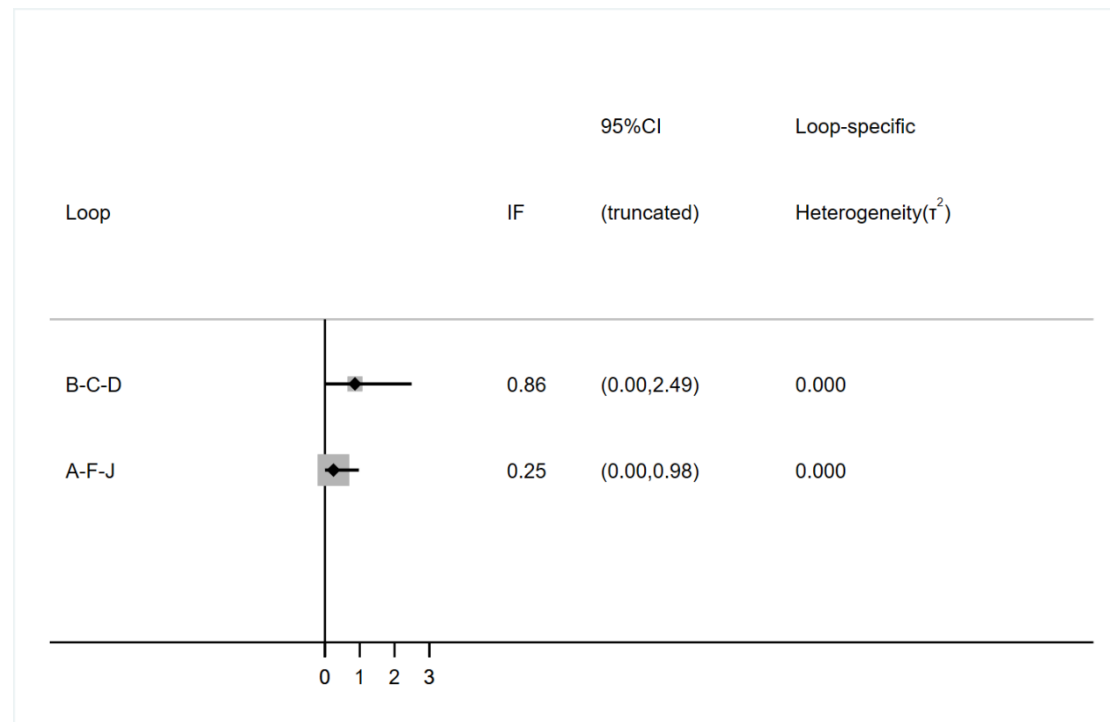

eFigure 3. Inconsistency for triangular loops in First peak KAM.

## Appendix 4 Conventional meta-analyses results

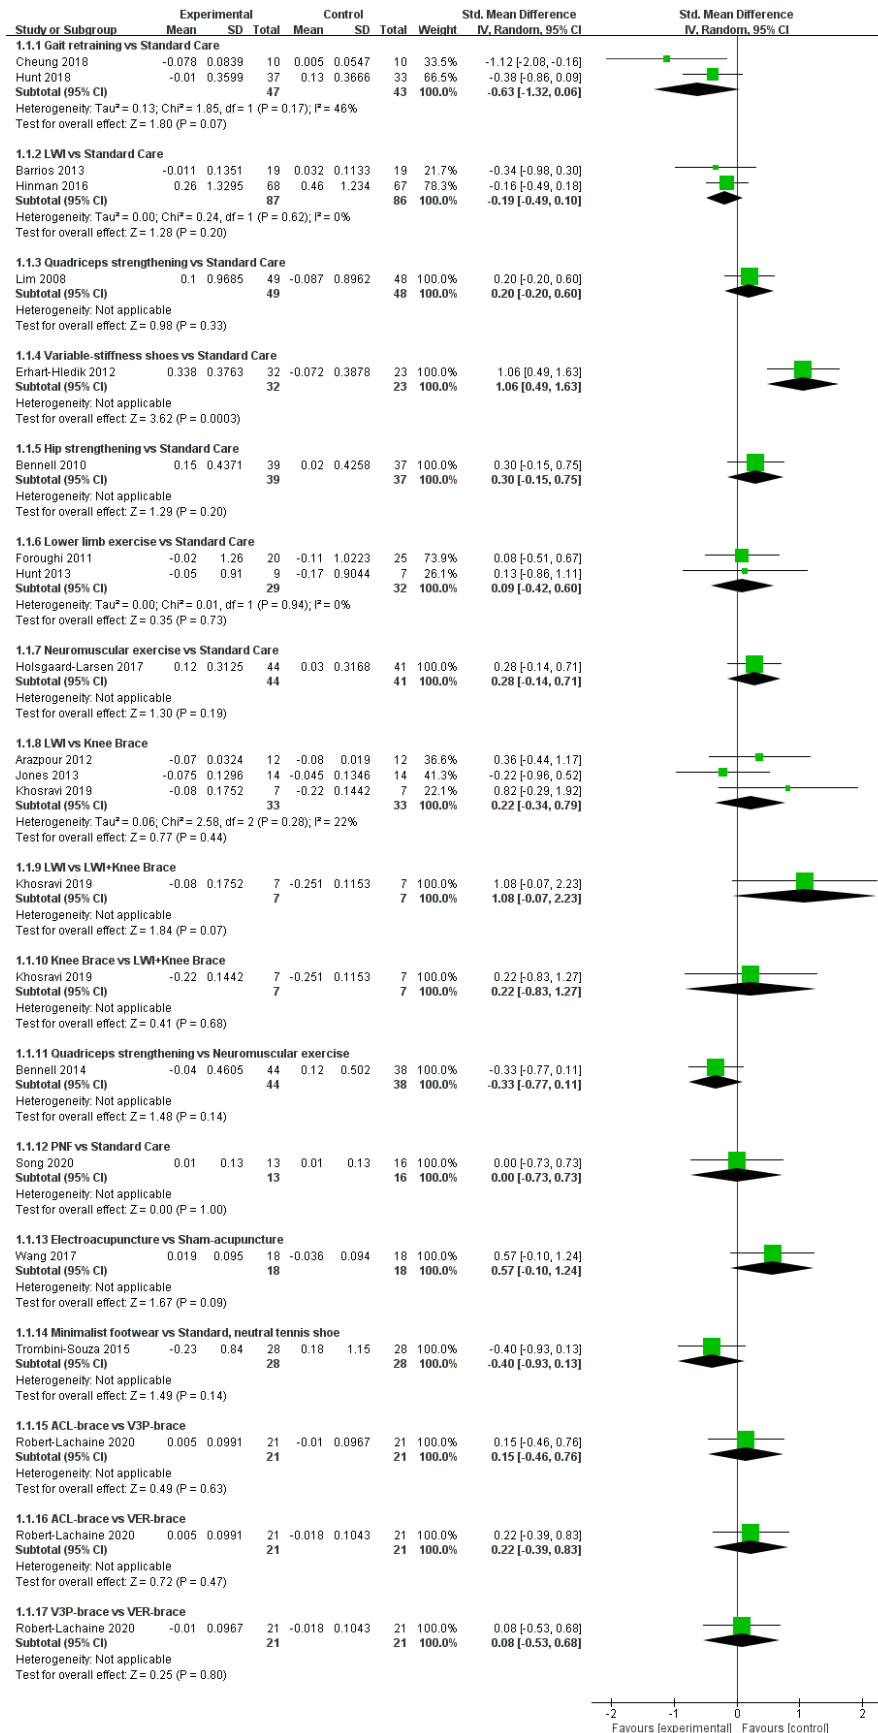

eFigure 4a. Conventional meta-analysis of treatment effects on First peak KAM.

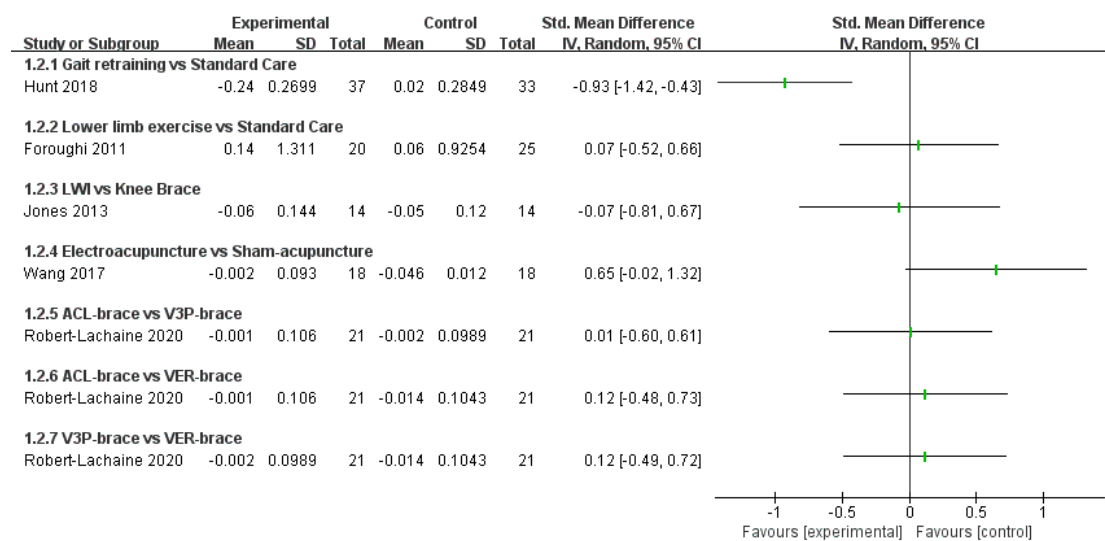

eFigure 4b. Conventional meta-analysis of treatment effects on Second peak KAM.

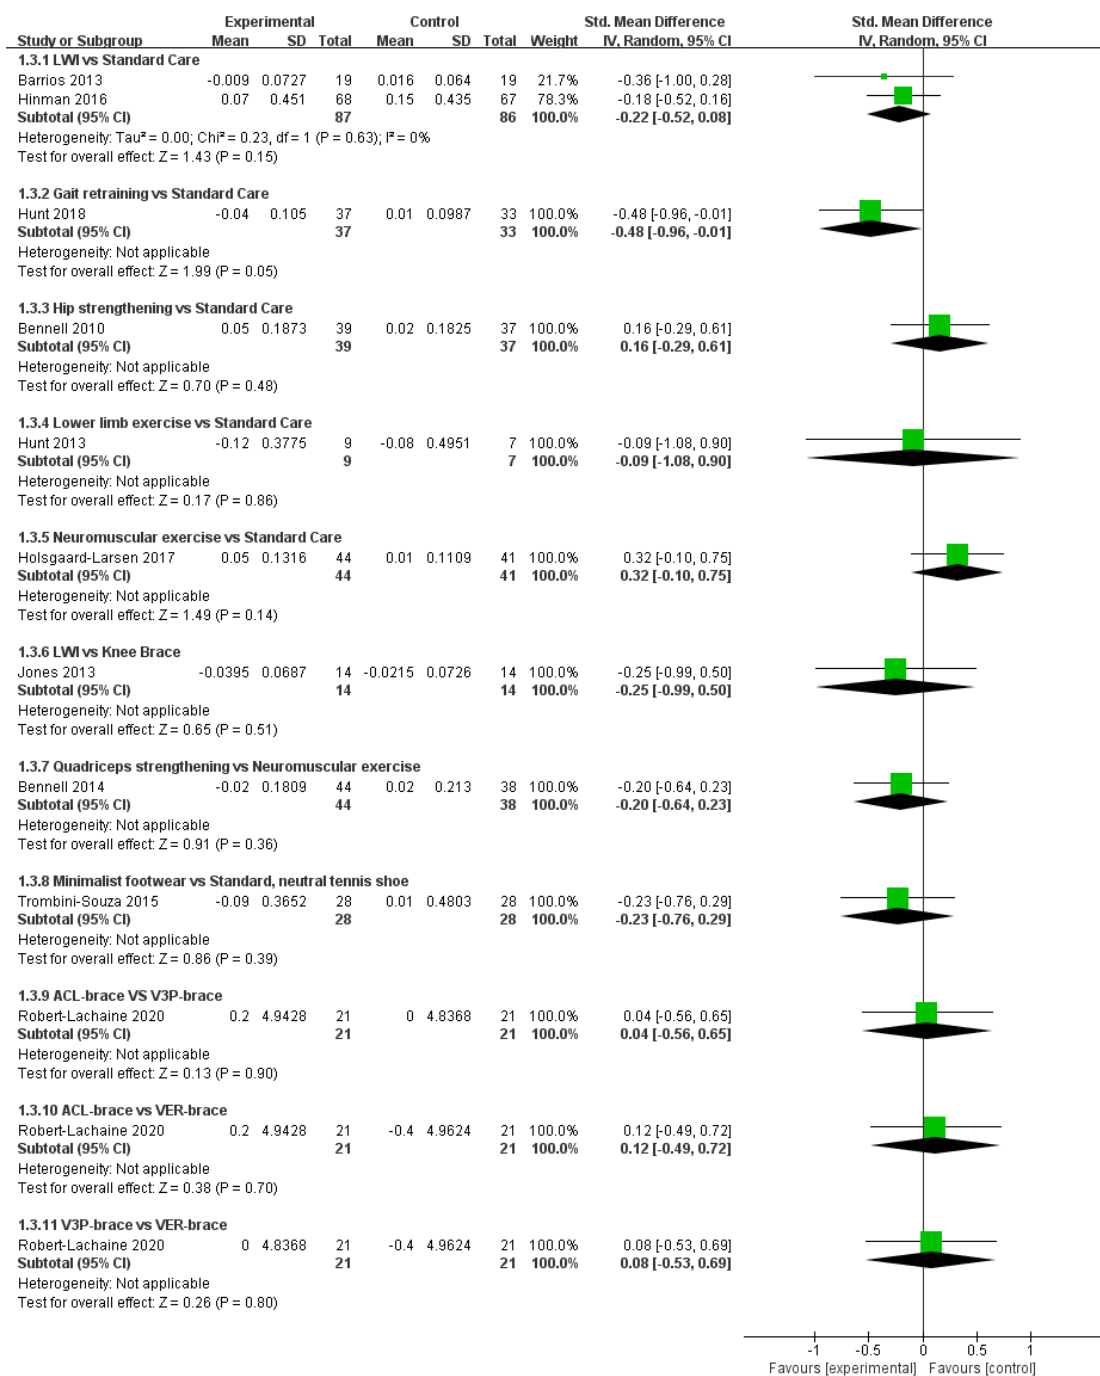

Figure 4c. Conventional meta-analysis of treatment effects on KAAI.

## Appendix 5 Network Diagram

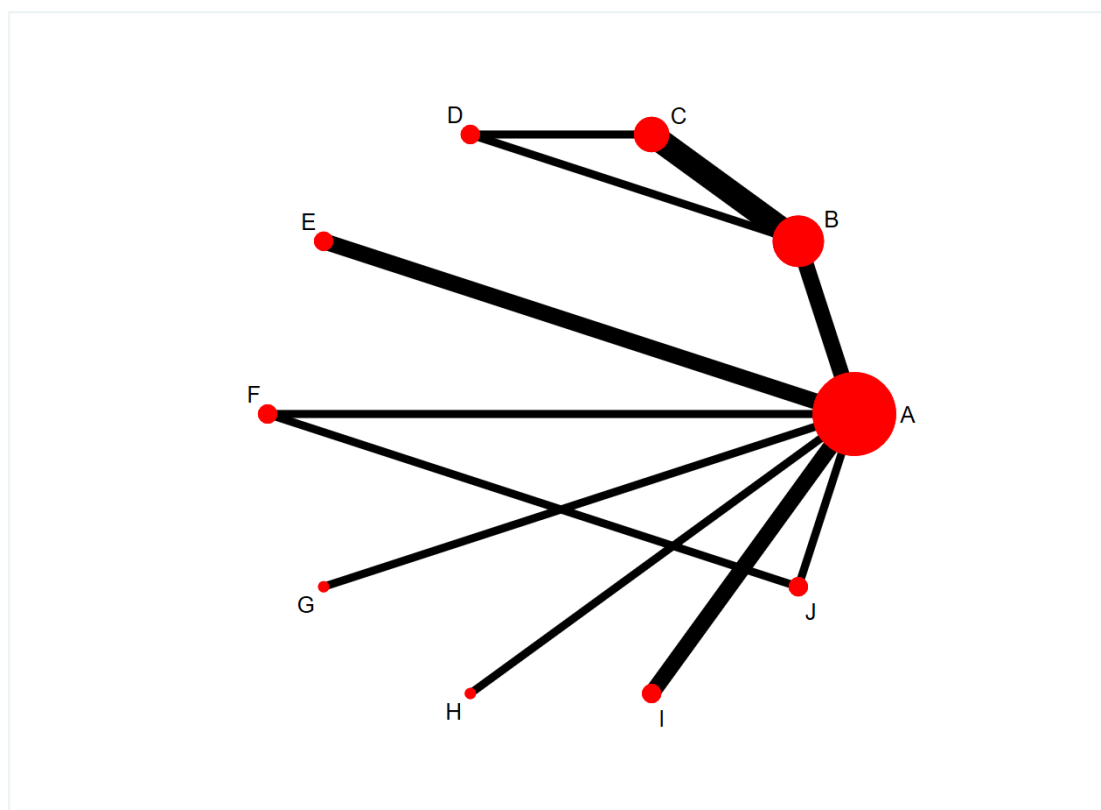

Figure 5a. Structure of network formed by interventions and their direct comparisons (First peak KAM). A= Standard care; B= Lateral Wedge Insole; C= Knee Brace; D= Lateral Wedge Insole+ Knee Brace; E= Gait retraining; F= Quadriceps strengthening; G= Variable-stiffness shoe; H= Hip strengthening; I= Lower limb exercise; J= Neuromuscular exercise.

**Footnote:** Width of the lines is proportional to the number of trials comparing every pair of treatments. Size of every circle is proportional to the number of randomly assigned participants (ie, sample size).

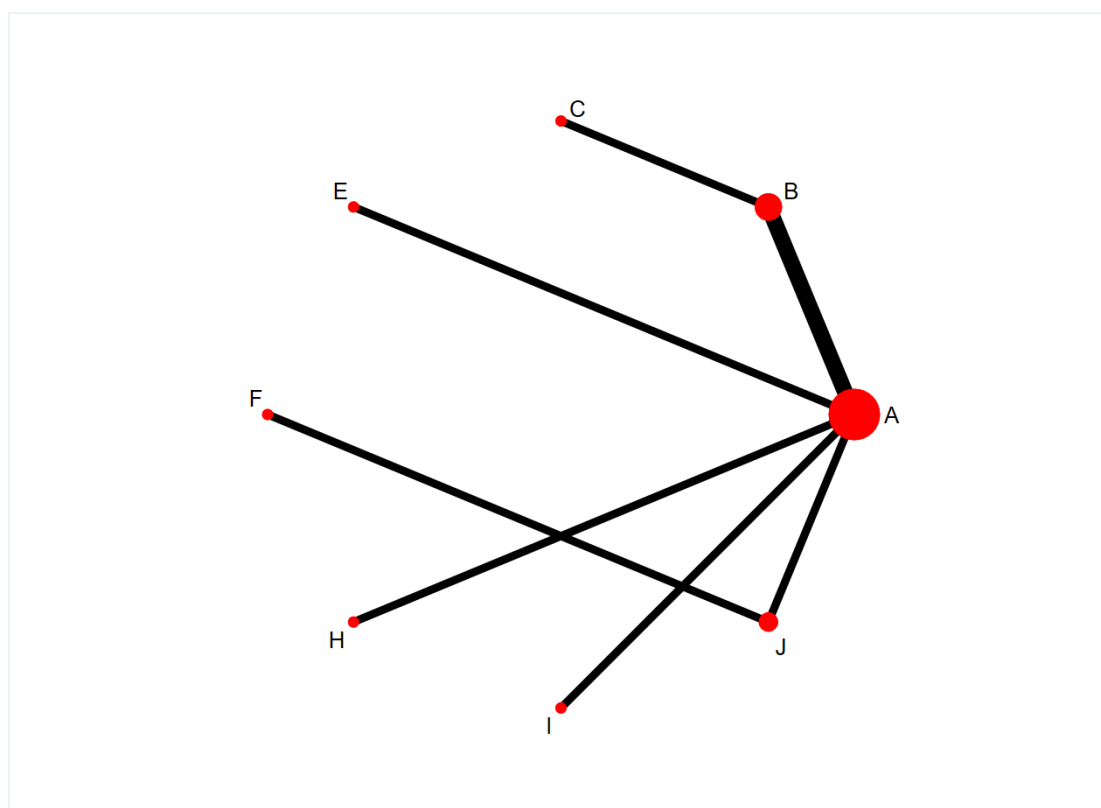

eFigure 5b. Structure of network formed by interventions and their direct comparisons (KAAI). A= Standard care; B= Lateral Wedge Insole; C= Knee Brace; E= Gait retraining; F= Quadriceps strengthening; H= Hip strengthening; I= Lower limb exercise; J= Neuromuscular exercise.

**Footnote:** Width of the lines is proportional to the number of trials comparing every pair of treatments. Size of every circle is proportional to the number of randomly assigned participants (ie, sample size).

## Appendix 6 Table of GRADE

Based on all the above information, we GRADEd each network estimate according to the following criteria:

- 1) Study limitations: We downgraded by one level when the contributions from low RoB comparisons were less than 30% and contributions from moderate RoB comparisons were 70% or greater. And we downgraded by two level when the contributions from low RoB comparisons were more than 30%.
- 2) Imprecision: We considered a clinically meaningful threshold for CI to be 0 and did not



downgrade the estimate if the upper limit is below 0; or if the lower limit is above 0.

- 3) Inconsistency: We rated two concepts, heterogeneity and incoherence (inconsistency), in this domain. For heterogeneity, we did not downgrade any network estimate for heterogeneity, because we looked at the common tau and found that it is low. For inconsistency, we looked at the results of inconsistency (Appendix 2), where we have not downgraded for imprecision.
- 4) Indirectness: We have assured transitivity in our network by limiting the included studies to patients with knee osteoarthritis. Evaluation of transitivity for singly-connected nodes is unclear, so we downgraded such nodes for indirectness.
- 5) Publication bias: The comparison-adjusted funnel plot (Appendix 5) did not suggest presence of overall publication bias. We managed to retrieve supplementary and unpublished information included in the available systematic reviews and network meta-analyses, and we are confident that we have all available information that is possible to capture from clinical trial registries. Although we cannot completely rule out the possibility that some research is still missing, we still believe that the project does not need to be downgraded.

| Comparison                                           | Nature of the Evidence | GRADE    | Downgrading due to                           |
|------------------------------------------------------|------------------------|----------|----------------------------------------------|
| <b>AB:</b> Standard Care vs LWI                      | Mixed                  | LOW      | Study limitations; Imprecision               |
| <b>AC:</b> Standard Care vs Knee Brace               | Indirect               | LOW      | Study limitations; Imprecision               |
| <b>AD:</b> Standard Care vs LWI+Knee Brace           | Indirect               | LOW      | Study limitations; Imprecision               |
| <b>AE:</b> Standard Care vs Gait Retraining          | Mixed                  | VERY LOW | Study limitations; Indirectness              |
| <b>AF:</b> Standard Care vs Quadriceps Strengthening | Mixed                  | VERY LOW | Study limitations; Imprecision               |
| <b>AG:</b> Standard Care vs Variable-Stiffness Shoes | Mixed                  | VERY LOW | Study limitations; Indirectness;             |
| <b>AH:</b> Standard Care vs Hip Strengthening        | Mixed                  | VERY LOW | Study limitations; Indirectness; Imprecision |
| <b>AI:</b> Standard Care vs Lower Limb               | Mixed                  | VERY LOW | Study limitations; Indirectness;             |

| Exercise                                           |          |          | Imprecision                                  |
|----------------------------------------------------|----------|----------|----------------------------------------------|
| <b>AJ:</b> Standard Care vs Neuromuscular Exercise | Mixed    | MODERATE | Study limitations                            |
| <b>BC:</b> LWI vs Knee Brace                       | Mixed    | VERY LOW | Study limitations; Imprecision               |
| <b>BD:</b> LWI vs LWI+Knee Brace                   | Mixed    | VERY LOW | Study limitations; Imprecision               |
| <b>BE:</b> LWI vs Gait Retraining                  | Indirect | VERY LOW | Study limitations; Indirectness; Imprecision |
| <b>BF:</b> LWI vs Quadriceps Strengthening         | Indirect | LOW      | Study limitations; Imprecision               |
| <b>BG:</b> LWI vs Variable-Stiffness Shoes         | Indirect | LOW      | Study limitations; Indirectness              |
| <b>BH:</b> LWI vs Hip Strengthening                | Indirect | VERY LOW | Study limitations; Indirectness; Imprecision |
| <b>BI:</b> LWI vs Lower Limb Exercise              | Indirect | VERY LOW | Study limitations; Indirectness; Imprecision |
| <b>BJ:</b> LWI vs Neuromuscular Exercise           | Indirect | MODERATE | Study limitations                            |
| <b>CD:</b> Knee Brace vs LWI+Knee Brace            | Mixed    | VERY LOW | Study limitations; Imprecision               |
| <b>CE:</b> Knee Brace vs Gait Retraining           | Indirect | VERY LOW | Study limitations; Indirectness; Imprecision |
| <b>CF:</b> Knee Brace vs Quadriceps Strengthening  | Indirect | LOW      | Study limitations; Imprecision               |
| <b>CG:</b> Knee Brace vs Variable-Stiffness Shoes  | Indirect | LOW      | Study limitations; Indirectness              |
| <b>CH:</b> Knee Brace vs Hip Strengthening         | Indirect | VERY LOW | Study limitations; Indirectness; Imprecision |
| <b>CI:</b> Knee Brace vs Lower Limb Exercise       | Indirect | VERY LOW | Study limitations; Indirectness; Imprecision |
| <b>CJ:</b> Knee Brace vs Neuromuscular Exercise    | Indirect | MODERATE | Study limitations                            |
| <b>DE:</b> LWI+Knee Brace vs Gait Retraining       | Indirect | VERY LOW | Study limitations; Indirectness; Imprecision |

|    |                                             |          |          |                                  |
|----|---------------------------------------------|----------|----------|----------------------------------|
| 1  |                                             |          |          |                                  |
| 2  |                                             |          |          |                                  |
| 3  |                                             |          |          |                                  |
| 4  | <b>DF: LWI+Knee Brace vs Quadriceps</b>     | Indirect | LOW      | Study limitations; Imprecision   |
| 5  | Strengthening                               |          |          |                                  |
| 6  |                                             |          |          |                                  |
| 7  | <b>DG: LWI+Knee Brace vs Variable-</b>      | Indirect | VERY LOW | Study limitations; Indirectness  |
| 8  | Stiffness Shoes                             |          |          |                                  |
| 9  |                                             |          |          |                                  |
| 10 |                                             |          |          |                                  |
| 11 | <b>DH: LWI+Knee Brace vs Hip</b>            | Indirect | LOW      | Study limitations; Indirectness  |
| 12 | Strengthening                               |          |          |                                  |
| 13 |                                             |          |          |                                  |
| 14 |                                             |          |          |                                  |
| 15 | <b>DI: LWI+Knee Brace vs Lower Limb</b>     | Indirect | VERY LOW | Study limitations; Indirectness; |
| 16 | Exercise                                    |          |          | Imprecision                      |
| 17 |                                             |          |          |                                  |
| 18 |                                             |          |          |                                  |
| 19 | <b>DJ: LWI+Knee Brace vs</b>                | Indirect | MODERATE | Study limitations                |
| 20 | Neuromuscular Exercise                      |          |          |                                  |
| 21 |                                             |          |          |                                  |
| 22 |                                             |          |          |                                  |
| 23 | <b>EF: Gait Retraining vs Quadriceps</b>    | Indirect | VERY LOW | Study limitations; Indirectness  |
| 24 | Strengthening                               |          |          |                                  |
| 25 |                                             |          |          |                                  |
| 26 |                                             |          |          |                                  |
| 27 | <b>EG: Gait Retraining vs Variable-</b>     | Indirect | VERY LOW | Study limitations; Indirectness  |
| 28 | Stiffness Shoes                             |          |          |                                  |
| 29 |                                             |          |          |                                  |
| 30 |                                             |          |          |                                  |
| 31 | <b>EH: Gait Retraining vs Hip</b>           | Indirect | LOW      | Study limitations; Indirectness  |
| 32 | Strengthening                               |          |          |                                  |
| 33 |                                             |          |          |                                  |
| 34 |                                             |          |          |                                  |
| 35 | <b>EI: Gait Retraining vs Lower limb</b>    | Indirect | VERY LOW | Study limitations; Indirectness; |
| 36 | Exercise                                    |          |          | Imprecision                      |
| 37 |                                             |          |          |                                  |
| 38 |                                             |          |          |                                  |
| 39 | <b>EJ: Gait Retraining vs Neuromuscular</b> | Indirect | LOW      | Study limitations; Indirectness  |
| 40 | Exercise                                    |          |          |                                  |
| 41 |                                             |          |          |                                  |
| 42 |                                             |          |          |                                  |
| 43 | <b>FG: Quadriceps Strengthening vs</b>      | Indirect | VERY LOW | Study limitations; Indirectness  |
| 44 | Variable-Stiffness Shoes                    |          |          |                                  |
| 45 |                                             |          |          |                                  |
| 46 | <b>FH: Quadriceps Strengthening vs Hip</b>  | Indirect | VERY LOW | Study limitations; Indirectness; |
| 47 | Strengthening                               |          |          | Imprecision                      |
| 48 |                                             |          |          |                                  |
| 49 |                                             |          |          |                                  |
| 50 | <b>FI: Quadriceps Strengthening vs</b>      | Indirect | VERY LOW | Study limitations; Indirectness; |
| 51 | Lower Limb Exercise                         |          |          | Imprecision                      |
| 52 |                                             |          |          |                                  |
| 53 |                                             |          |          |                                  |
| 54 | <b>FJ: Quadriceps Strengthening vs</b>      | Mixed    | LOW      | Study limitations; Imprecision   |
| 55 | Neuromuscular Exercise                      |          |          |                                  |
| 56 |                                             |          |          |                                  |
| 57 |                                             |          |          |                                  |
| 58 | <b>GH: Variable-Stiffness Shoes vs Hip</b>  | Indirect | LOW      | Study limitations; Indirectness  |
| 59 |                                             |          |          |                                  |
| 60 |                                             |          |          |                                  |

Strengthening

**GI:** Variable-Stiffness Shoes vs Lower Limb Exercise Indirect VERY LOW Study limitations; Indirectness

**GJ:** Variable-Stiffness Shoes vs Neuromuscular Exercise Indirect LOW Study limitations; Indirectness

**HI:** Hip Strengthening vs Lower Limb Exercise Indirect VERY LOW Study limitations; Indirectness; Imprecision

**HJ:** Hip Strengthening vs Neuromuscular Exercise Indirect VERY LOW Study limitations; Indirectness; Imprecision

**IJ:** Lower Limb Exercise vs Neuromuscular Exercise Indirect VERY LOW Study limitations; Indirectness; Imprecision

**Appendix 7 Comparison-adjusted funnel plot for each outcome from the network meta-analysis**

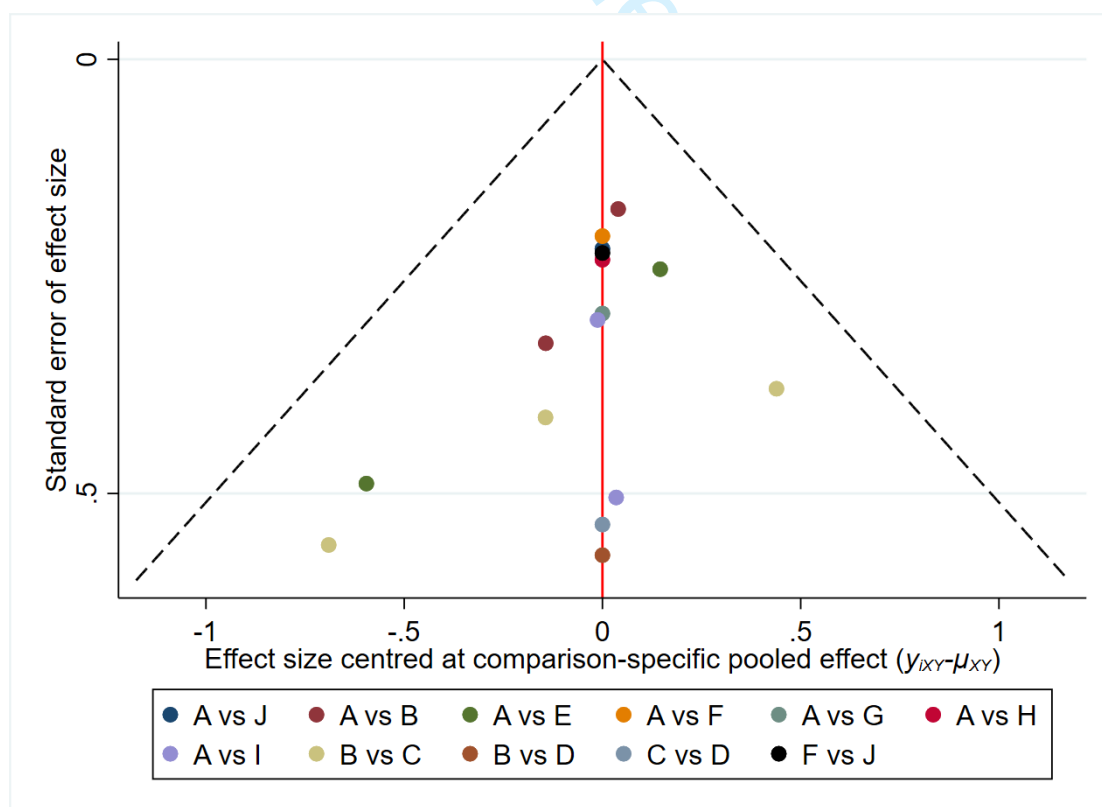

eFigure 6a. Comparison-adjusted funnel plot for First peak KAM.

A= Standard care; B= Lateral Wedge Insole; C= Knee Brace; D= Lateral Wedge Insole+ Knee Brace; E= Gait retraining; F= Quadriceps strengthening; G= Variable-stiffness shoe; H= Hip strengthening; I= Lower limb exercise; J= Neuromuscular exercise.

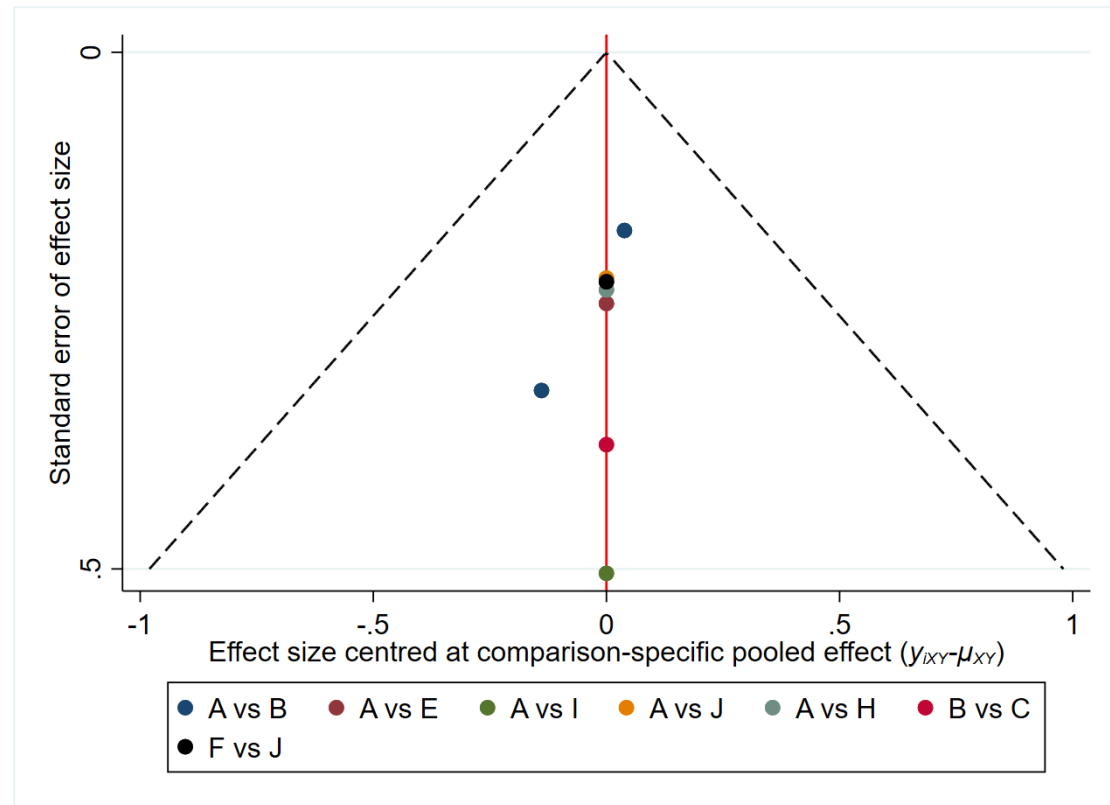

eFigure 6b. Comparison-adjusted funnel plot for KAAI.

A= Standard care; B= Lateral Wedge Insole; C= Knee Brace; E= Gait retraining; F= Quadriceps strengthening; H= Hip strengthening; I= Lower limb exercise; J= Neuromuscular exercise.

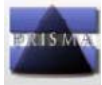

# PRISMA 2009 Checklist

| Section/Topic             | #  | Checklist Item                                                                                                                                                                                                                                                                                              | Reported on Page #                                            |
|---------------------------|----|-------------------------------------------------------------------------------------------------------------------------------------------------------------------------------------------------------------------------------------------------------------------------------------------------------------|---------------------------------------------------------------|
| <b>TITLE</b>              |    |                                                                                                                                                                                                                                                                                                             |                                                               |
| Title                     | 1  | Identify the report as a systematic review, meta-analysis, or both.                                                                                                                                                                                                                                         | Title page                                                    |
| <b>ABSTRACT</b>           |    |                                                                                                                                                                                                                                                                                                             |                                                               |
| Structured summary        | 2  | Provide a structured summary including, as applicable: background; objectives; data sources; study eligibility criteria, participants, and interventions; study appraisal and synthesis methods; results; limitations; conclusions and implications of key findings; systematic review registration number. | Abstract                                                      |
| <b>INTRODUCTION</b>       |    |                                                                                                                                                                                                                                                                                                             |                                                               |
| Rationale                 | 3  | Describe the rationale for the review in the context of what is already known.                                                                                                                                                                                                                              | Introduction, paragraph 1-4                                   |
| Objectives                | 4  | Provide an explicit statement of questions being addressed with reference to participants, interventions, comparisons, outcomes, and study design (PICOS).                                                                                                                                                  | Introduction, paragraph 5                                     |
| <b>METHODS</b>            |    |                                                                                                                                                                                                                                                                                                             |                                                               |
| Protocol and registration | 5  | Indicate if a review protocol exists, if and where it can be accessed (e.g., Web address), and, if available, provide registration information including registration number.                                                                                                                               | METHODS, paragraph 1                                          |
| Eligibility criteria      | 6  | Specify study characteristics (e.g., PICOS, length of follow-up) and report characteristics (e.g., years considered, language, publication status) used as criteria for eligibility, giving rationale.                                                                                                      | METHODS, Identification and selection of studies              |
| Information sources       | 7  | Describe all information sources (e.g., databases with dates of coverage, contact with study authors to identify additional studies) in the search and date last searched.                                                                                                                                  | METHODS, Identification and selection of studies, paragraph 1 |
| Search                    | 8  | Present full electronic search strategy for at least one database, including any limits used, such that it could be repeated.                                                                                                                                                                               | Appendix 1 Search strategies                                  |
| Study selection           | 9  | State the process for selecting studies (i.e., screening, eligibility, included in systematic review, and, if applicable, included in the meta-analysis).                                                                                                                                                   | Results, figure 1                                             |
| Data collection process   | 10 | Describe method of data extraction from reports (e.g., piloted forms, independently, in duplicate) and any processes for obtaining and confirming data from investigators.                                                                                                                                  | METHODS, Identification                                       |

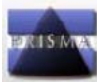

# PRISMA 2009 Checklist

1  
2  
3  
4  
5  
6  
7  
8  
9  
10  
11  
12  
13  
14  
15  
16  
17  
18  
19  
20  
21  
22  
23  
24  
25  
26  
27  
28  
29  
30  
31  
32  
33  
34  
35  
36  
37  
38  
39  
40  
41  
42  
43  
44  
45  
46  
47

For peer review only

|                                    |    |                                                                                                                                                                                                                        |                                                                                                           |
|------------------------------------|----|------------------------------------------------------------------------------------------------------------------------------------------------------------------------------------------------------------------------|-----------------------------------------------------------------------------------------------------------|
|                                    |    |                                                                                                                                                                                                                        | and selection of studies, paragraph 2                                                                     |
| Data items                         | 11 | List and define all variables for which data were sought (e.g., PICOS, funding sources) and any assumptions and simplifications made.                                                                                  | METHODS, Identification and selection of studies, paragraph 2, 3 & Data Collection and Quality assessment |
| Risk of bias in individual studies | 12 | Describe methods used for assessing risk of bias of individual studies (including specification of whether this was done at the study or outcome level), and how this information is to be used in any data synthesis. | METHODS, Assessment of characteristics of studies & Results, Figure 4                                     |
| Summary measures                   | 13 | State the principal summary measures (e.g., risk ratio, difference in means).                                                                                                                                          | METHODS, Statistical analysis                                                                             |
| Synthesis of results               | 14 | Describe the methods of handling data and combining results of studies, if done, including measures of consistency (e.g., $I^2$ ) for each meta-analysis.                                                              | METHODS, Statistical analysis                                                                             |

| Section/Topic               | #  | Checklist Item                                                                                                                                   | Reported on Page #                                |
|-----------------------------|----|--------------------------------------------------------------------------------------------------------------------------------------------------|---------------------------------------------------|
| Risk of bias across studies | 15 | Specify any assessment of risk of bias that may affect the cumulative evidence (e.g., publication bias, selective reporting within studies).     | METHODS, Assessment of characteristics of studies |
| Additional analyses         | 16 | Describe methods of additional analyses (e.g., sensitivity or subgroup analyses, meta-regression), if done, indicating which were pre-specified. | METHODS, Statistical                              |

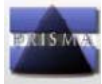

# PRISMA 2009 Checklist

|                               |    |                                                                                                                                                                                                          |                                                           |
|-------------------------------|----|----------------------------------------------------------------------------------------------------------------------------------------------------------------------------------------------------------|-----------------------------------------------------------|
|                               |    |                                                                                                                                                                                                          | Analysis                                                  |
| <b>RESULTS</b>                |    |                                                                                                                                                                                                          |                                                           |
| Study selection               | 17 | Give numbers of studies screened, assessed for eligibility, and included in the review, with reasons for exclusions at each stage, ideally with a flow diagram.                                          | Results, Characteristics of included studies & Figure 1   |
| Study characteristics         | 18 | For each study, present characteristics for which data were extracted (e.g., study size, PICOS, follow-up period) and provide the citations.                                                             | Results, Characteristics of included studies & Table 1, 2 |
| Risk of bias within studies   | 19 | Present data on risk of bias of each study and, if available, any outcome level assessment (see item 12).                                                                                                | Results, Risk of bias & Figure 4                          |
| Results of individual studies | 20 | For all outcomes considered (benefits or harms), present, for each study: (a) simple summary data for each intervention group (b) effect estimates and confidence intervals, ideally with a forest plot. | Results, KAM & KAAI & Appendix 4                          |
| Synthesis of results          | 21 | Present the main results of the review. If meta-analyses done, include for each, confidence intervals and measures of consistency.                                                                       | Results, KAM & KAAI (Table 3 & Figure 2, 3)               |
| Risk of bias across studies   | 22 | Present results of any assessment of risk of bias across studies (see Item 15).                                                                                                                          | Results, Risk of bias & Appendix 6                        |
| Additional analysis           | 23 | Give results of additional analyses, if done (e.g., sensitivity or subgroup analyses, meta-regression [see Item 16]).                                                                                    | Appendix 2 & 3 & 7                                        |
| <b>DISCUSSION</b>             |    |                                                                                                                                                                                                          |                                                           |
| Summary of evidence           | 24 | Summarize the main findings including the strength of evidence for each main outcome; consider their relevance to key groups (e.g., healthcare providers, users, and policy makers).                     | Discussion, paragraph 1 & Conclusion                      |



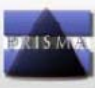

# PRISMA 2009 Checklist

1  
2  
3  
4  
5  
6  
7  
8  
9  
10  
11  
12  
13  
14  
15  
16  
17  
18  
19  
20  
21  
22  
23  
24  
25  
26  
27  
28  
29  
30  
31  
32  
33  
34  
35  
36  
37  
38  
39  
40  
41  
42  
43  
44  
45  
46  
47

|                |    |                                                                                                                                                               |                                          |
|----------------|----|---------------------------------------------------------------------------------------------------------------------------------------------------------------|------------------------------------------|
| Limitations    | 25 | Discuss limitations at study and outcome level (e.g., risk of bias), and at review-level (e.g., incomplete retrieval of identified research, reporting bias). | Discussion, paragraph 4                  |
| Conclusions    | 26 | Provide a general interpretation of the results in the context of other evidence, and implications for future research.                                       | Conclusion & Discussion, paragraph 8 & 9 |
| <b>FUNDING</b> |    |                                                                                                                                                               |                                          |
| Funding        | 27 | Describe sources of funding for the systematic review and other support (e.g., supply of data); role of funders for the systematic review.                    | Funding                                  |

From: Moher D, Liberati A, Tetzlaff J, Altman DG, The PRISMA Group (2009). Preferred Reporting Items for Systematic Reviews and Meta-Analyses: The PRISMA Statement. PLoS Med 6(6): e1000097. doi:10.1371/journal.pmed1000097

For more information, visit: [www.prisma-statement.org](http://www.prisma-statement.org).

## List of Responses

Dear Editors and Reviewer:

Thank you very much for your kind advice and valuable comments in helping us improve our manuscript. We have substantially modified the manuscript, according to the questions raised by the Editor and Reviewers. All the modified words, sentences and paragraphs were labeled with red fonts. A point-to-point response to highlight how we have addressed each of the comments is listed below.

Comments and Suggestions for Authors:

-Please remove the “significance and Innovations” section, and replace it with a ‘Strengths and limitations’ section (after the abstract). This section should contain up to five short bullet points, no longer than one sentence each, that relate specifically to the methods. The results of the study should not be summarised here.

-Please remove any references to your INPLASY registration from your manuscript.

Response 1: Thank you for your thoughtful suggestion. We re-written this part as required. (Line 70-80, 95-105).

Reviewer: 1

Dr. Erin Macri, Erasmus MC, The University of British Columbia

Comments to the Author:

This study is a systematic review and network meta-analysis comparing the efficacy of physical therapy and orthopaedic equipment on KAM and KAI in individuals with predominantly medial tibiofemoral joint osteoarthritis. The research question is clinically relevant given that biomechanics are believed to be a key cause of OA and OA-related symptoms.

Overall, the analysis appears to be sound but the interpretation needs more clinical perspective and the writing is difficult to follow in some sections. Below I provide some suggestions that I hope the authors will find useful.

Abstract.

Please reword the research question for grammar and accuracy. Instead of efficiency, I think the authors mean efficacy. Please be specific with which biomechanical risk factors (i.e. only KAM and KAI). Also, I believe the authors have only included studies of tibiofemoral joint osteoarthritis, so they may wish to consider being more specific. These changes should be done throughout the text.

Response 2: Yes, your opinion is very rigorous. We carefully considered the wording according to the purpose of the article and revised them to be more specific. (Line 1, 66-68, 92, 139, 147-148, 169, 181-182, 183, 187, 353, 366-367, 457)

Line 81 - please clarify that variable stiffness shoes made the KAM worse (lower rate of KAM reduction is misleading).

Response 3: The statements have been corrected. We will be happy to edit the text further, based on helpful comments from the reviewers.

Methods (e.g. Bayesian NMA) are provided in the conclusion section instead of Methods section. Please report results and conclusions in a way that balances statistical significance and clinical relevance. Further comments regarding this are provided below.

## Introduction.

In general the Introduction wanders around the topic but needs more focus to guide the reader to the research question. More original references are required to justify some of the comments. For example, first sentence 3.8% OA prevalence - where did this number come from? What evidence has shown that obesity is associated with frontal plane knee alignment? What specific other risk factors have evidence showing that they are associated with knee alignment?

Response 4: We agree, we have deleted some redundant sentences in this part to make it read closer to the core of this article. At the same time, we also added more original references as evidence. (Line 109-110, 125-127)

Please provide a rationale why the authors think that exercises might alter knee alignment. Please also be sure to introduce the concept of physical therapy into the introduction, and again provide a rationale as to why the authors think that modalities such as ultrasound and so forth might affect biomechanics? Provide references to justify this. If such a rationale does not exist, then consider limiting this study to gait retraining and orthopaedic devices which have a rationale and evidence to support a link to biomechanics.

Response 5: We thank the reviewer for the suggestion. Previous studies have shown that a lower knee joint loading rate in patients with stronger quadriceps and hamstring. And the strengthening of related lower limb muscles may play a vital role in disease progression<sup>4</sup> (Line 147-150). Although the effects of gait retraining and orthopedic devices on biomechanics are more direct than the effects of modalities such as ultrasound and Taiji, some studies have shown that the joint pain can affect the kinetics and kinematics of walking<sup>2</sup>. These modalities such as ultrasound and Taiji had a certain effect on pain relief<sup>5</sup>, so we didn't want to miss any treatment which can affect biomechanics when we set the topic. Besides, we introduce the concept of physical therapy and orthopedic equipment into the introduction (Line 141-145).

Avoid the term 'non-surgical' since this is not accurate for this paper. Non-surgical treatments would also include medications, injections and other treatments not included under physical therapy and orthopaedic devices. Please be specific.

Response 6: We replaced this word with "physical treatments and orthopedic equipment".

Please reword research questions so that they are grammatically correct and accurate and specific to the present study.

Response 7: We apologize for our carelessness. Thank you for your thoughtful suggestion. We have corrected it. (Line 172-174)

## Methods

Line 180 and 187: Please clarify if the eligible studies were in English language only or not and be consistent here.

Response 8: We apologize for our carelessness. We normalized the language to make it clear that the eligible studies were in English language only (Line 184, 190).

Clarify if eligible studies were limited to tibiofemoral OA only. There don't appear to be any studies on patellofemoral OA included in this study.

Response 9: We thank this reviewer for pointing out this critical point. The eligible studies were indeed limited to tibiofemoral OA only. We changed this section in the method and abstract.

Line 189. Placebo, no intervention, and sham are not standard care and should therefore not be

1  
2  
3 labelled as such. Box 1 is worded in a way that suggests that actual standard care was not included.  
4 Please reword and clarify.

5  
6 Response 10: We thank the reviewer for pointing out this issue. In fact, we named standard care as  
7 a summative name for a variety of control interventions with high homogeneity such as placebo, no  
8 intervention, sham, standard / conventional care or waiting list control (analytical advice and  
9 education). We also considered whether this word fully fit each treatment it contains. Although these  
10 treatments were roughly the same, there were still some differences. Using standard care to  
11 summarize these treatments may not completely and accurately describe each included intervention,  
12 but we consider that it is a more appropriate description and a more understandable description. At  
13 the same time, we also replaced the description in box 1 with a more comprehensive description.

14  
15  
16 Line 199. “non-trial papers” – do the authors mean papers that were not peer-reviewed? Please  
17 clarify.

18  
19 Response 11: We replaced this word with " non-experimental".

20  
21 Line 201. What constitutes “studies that did not report suitable data”. Please be concrete about what  
22 this means.

23  
24 Response 12: The “studies that did not report suitable data” corresponds to “studies that did not  
25 report KAM or KAAI” (this is now clarified in the text) (Line 205).

26  
27 Line 214. Please justify why Cochrane ROB version 1 was used, or consider updating to use the  
28 current ROB version 2 which is currently recommended by Cochrane.

29  
30 Response 13: We agree, and we have used ROB version 2 to replace the previous version.

31  
32 Line 229. Please be specific about the conditions and time of assessments of the outcomes. Some  
33 RCTs only measure biomechanics as immediate effects with and without the knee brace on, for  
34 example, and they do so prior to the actual clinical trial. For all studies in which devices were worn  
35 (braces, insoles, etc), be sure to report whether the outcomes were measured before or after treatment,  
36 and whether the device was worn or not at the time of evaluation.

37  
38 Response 14: We apologize for our carelessness. We have already described the conditions and time  
39 of assessments of the outcomes in more detail. “ Baseline biomechanical risk factors were extracted  
40 from walking test without any orthopedic equipment before intervention, and biomechanical risk  
41 factors after intervention were extracted from walking test with orthopedic equipment.” (Line 236-  
42 238).

43  
44 Statistical analyses.

45  
46 Please include references for all statistical tests and methods employed.

47  
48 Response 15: Revised.

49  
50 Line 247. What methods were employed to evaluate the source of heterogeneity? Also, remember  
51 to report in the results with a result was based on FE or RE, and the results of these additional  
52 analyses to evaluate source of heterogeneity.

53  
54 Response 16: We used a random-effects model for meta-analysis, and a sensitivity analysis to  
55 evaluate the source of heterogeneity (this is now added in the text). (Line 254-259). At the same  
56 time, we added heterogeneity evaluation to the results (Line 328-332).

57  
58 Figure 1. Using the PRISMA guidelines, it is not required to report reasons for exclusion at the  
59 title/abstract screen. Please update Figure 1 to adhere to PRISMA guidelines.

60  
61 Response 17: We agree with the reviewer’s assessment and have implemented their suggestion.

62  
63 Results.

64  
65 For orthopaedic interventions, please remember to discuss whether biomechanical effects were pre-

1  
2  
3 and post-intervention, or if they were done at a single time point with orthopaedic device off and  
4 then on.

5  
6 [Response 18: We have added a detailed description of this \(Line 236-238\).](#)

7  
8 Section 3.3 KAM, 3.4 KAI

9  
10 Please rewrite this section to provide a narrative synthesis/summary of the results in a way that is  
11 understandable to the reader. Effect sizes do not need to be repeated in the text since they are already  
12 in Table 3, so use this space to help the reader understand the results. Please make sure to emphasize  
13 that despite the rankings at the end of each section, they are not significant and therefore not  
14 clinically relevant. For any results that are statistically significant, be sure to also consider their  
15 clinical interpretation – are any of the results clinically important?

16  
17 [Response 19: We have made correction according to the Reviewer's comments. We have re-written](#)  
18 [the result section to help readers understand the final clinical significance of our study. At the](#)  
19 [same time, we have increased the clinical interpretation of the results \(Line 403-411\).](#)

20  
21 Line 307. This sentence should be removed regarding stair ambulation. Stairs was not included in  
22 the eligibility criteria of this analysis.

23  
24 [Response 20: We are very sorry for the misunderstanding of our previous description. This article](#)  
25 [met our eligibility criteria. However, considering that its inclusion in meta-analysis will lead to](#)  
26 [excessive heterogeneity, we excluded it from the network meta-analysis. Our intention is that the](#)  
27 [biomechanical indicators of the studies included in the Bayesian network meta-analysis were](#)  
28 [measured on flat ground or treadmills. Other studies that cannot be included in the network meta-](#)  
29 [analysis were included in the systematic review. We have corrected this imprecise sentence \(Line](#)  
30 [208-209\).](#)

31  
32 Risk of Bias.

33  
34 Figure 4 seems to be missing – the only Figure 4 I can see is the funnel plot, not the ROB table.  
35 ROB is not the same thing as quality. Be sure to use accurate and consistent language.

36  
37 [Response 21: We apologize for our carelessness. We uploaded the Figure 4 according to ROB 2.0.](#)  
38 [At the same time, we have refined the language \(Line 341-342\).](#)

| Study ID              | Randomization process | Deviations from intended i | Missing outcome data | Measurement of the outcome | Selection of the reported | Overall |
|-----------------------|-----------------------|----------------------------|----------------------|----------------------------|---------------------------|---------|
| Arazpour 2012         | ?                     | ?                          | ?                    | +                          | +                         | !       |
| Barrios 2013          | ?                     | +                          | +                    | +                          | +                         | !       |
| Bennell 2010          | +                     | +                          | +                    | +                          | +                         | +       |
| Bennell 2014          | +                     | +                          | ?                    | +                          | +                         | ?       |
| Cheung 2018           | ?                     | ?                          | ?                    | +                          | ?                         | ?       |
| Erhart-Hledik 2012    | ?                     | +                          | ?                    | +                          | ?                         | ?       |
| Foroughi 2011         | ?                     | +                          | ?                    | +                          | +                         | ?       |
| Hinman 2016           | ?                     | +                          | ?                    | +                          | +                         | !       |
| Holsgaard-Larsen 2017 | +                     | +                          | +                    | +                          | +                         | +       |
| Hunt 2013             | +                     | +                          | +                    | +                          | ?                         | !       |
| Hunt 2018             | ?                     | ?                          | +                    | +                          | ?                         | ?       |
| Jones 2013            | ?                     | ?                          | ?                    | +                          | ?                         | ?       |
| Khosravi 2019         | ?                     | ?                          | ?                    | ?                          | ?                         | !       |
| Lim 2008              | +                     | ?                          | ?                    | +                          | ?                         | ?       |
| Robert-Lachaine 2020  | ?                     | ?                          | +                    | +                          | +                         | ?       |
| Song 2020             | ?                     | ?                          | ?                    | +                          | ?                         | ?       |
| Trombini-Souza 2015   | ?                     | +                          | +                    | +                          | +                         | !       |
| Wang 2017             | +                     | ?                          | +                    | +                          | ?                         | ?       |

Figure 4

Be sure to include the GRADE results in the Results section.

Response 22: We have added the grade section (Line 333-339).

Discussion.

The authors have used up more than 2 pages of writing to discuss “strengths and limitations”. This should be reduced to 1 paragraph maximum, and should focus on limitations more so than strengths. Much of this writing could be moved to the methods section to justify choices of methods.

Response 23: Yes, your opinion is very rigorous. We carefully deleted some sentences according to the purpose of the article and revised them to be more specific.

Line 369. “there was no study that reported the immediate effect” – what about Wang 2017? Table reports these were immediate effects.

Response 24: We thank the reviewer for pointing out this issue. Our intention was that immediate effect were not included in this network meta-analysis. We have deleted this sentence to avoid ambiguity.

Line 375. Sensitivity analyses should be reported in the methods and results section, no in the Discussion section.

1  
2  
3  
4  
5  
6  
7  
8  
9  
10  
11  
12  
13  
14  
15  
16  
17  
18  
19  
20  
21  
22  
23  
24  
25  
26  
27  
28  
29  
30  
31  
32  
33  
34  
35  
36  
37  
38  
39  
40  
41  
42  
43  
44  
45  
46  
47  
48  
49  
50  
51  
52  
53  
54  
55  
56  
57  
58  
59  
60

Response 25: We have moved this section to the results section (Line 329-332).

Please include some discussion as to whether the condition of device wear during biomechanics testing might influence the results. Do the authors think that LWI and braces only work if they are donned, or would a period of wear result in changes to biomechanics even after the devices are removed?

Response 26: We have added this part to the discussion (Line 394-396, 403-411). The results of current study showed that there is no statistically significant reduction in biomechanics after taking off the LWI after one year of treatment, which is contrary to the results of donning it<sup>1</sup>. Therefore, as the reviewer said, we believe that once the LWI and braces are removed, they do not work anymore. This is the reason that we recommend gait training - it not only has better long-term effect, but also is more comfortable than wearing equipment for OA patients who need a long-term therapy.

Line 424. Mazzoli references is Maleki.

Response 27: We apologize for our carelessness, and we have corrected it.

Line 430. Please justify why the authors think that Taiji, ultrasound and acoustic exercises might alter biomechanics. Are these studies really necessary?

Response 28: As mentioned earlier, we still believe that Taiji and ultrasound have some effects on pain relief and muscle strength, which can affect the kinetics and kinematics of walking. So we didn't want to miss any treatment that can affect biomechanics when we set the topic.

Variable-stiffness shoes appear to make KAM worse. Would the authors recommend against use of these as a treatment for OA? Is there other evidence showing efficacy for other outcomes like pain or OA structural features that might still support the use of this intervention?

Response 29: It is really true as Reviewer suggested that variable-stiffness shoes may make KAM worse. We have expressed our attitude of recommending against use of these in the discussion and conclusion. As Reviewer suggested that we have added other evidence which still support the use of this intervention (Line 432-437). Although the results of this study suggested that wearing variable-stiffness shoes is not a good choice for long-term reduction of KAM, current study have pointed out that variable-stiffness shoe will have greater benefits in reducing KAM for patients with increasing walking speed. At the same time, variable-stiffness shoes had relatively weaker discomfort than equipment such as LWI<sup>3</sup>. Perhaps with the increase of the number of participants and the gradual rigor of the study process, the results of variable-stiffness shoes may be completely different in the future.

Conclusion. Please provide concrete conclusions. "The best" therapy according to NMA ranking does not necessarily mean effective. Integrate statistical significant, clinical importance of effect size, and rankings and provide the reader with concrete recommendations.

Response 30: We have re-written this part according to the Reviewer's suggestion (Line 458-462).

Thank you for the opportunity to review this work.

Special thanks to you for your good comments.

## REFERENCES

1. Barrios JA, Butler RJ, Crenshaw JR, Royer TD, Davis IS. Mechanical effectiveness of lateral foot wedging in medial knee osteoarthritis after 1 year of wear. *J Orthop Res*. 2013;31(5):659-664.
2. Briem K, Snyder-Mackler L. Proximal gait adaptations in medial knee OA. *Journal of orthopaedic research : official publication of the Orthopaedic Research Society*. 2009;27(1):78-83.
3. Erhart-Hledik JC, Mahtani GB, Asay JL, et al. Changes in knee adduction moment wearing a



1  
2  
3 variable-stiffness shoe correlate with changes in pain and mechanically stimulated cartilage  
4 oligomeric matrix levels. *Journal of orthopaedic research : official publication of the Orthopaedic*  
5 *Research Society*. 2021;39(3):619-627.  
6

- 7  
8 4. Mikesky AE, Meyer A, Thompson KL. Relationship between quadriceps strength and rate of  
9 loading during gait in women. *Journal of orthopaedic research : official publication of the*  
10 *Orthopaedic Research Society*. 2000;18(2):171-175.  
11  
12 5. Yang F, Liu W. Knee joint biomechanics of simplified 24 Tai Chi forms and association with pain  
13 in individuals with knee osteoarthritis: A pilot study. *Osteoarthritis and cartilage open*. 2021;3(2).  
14  
15  
16  
17  
18  
19  
20  
21  
22  
23  
24  
25  
26  
27  
28  
29  
30  
31  
32  
33  
34  
35  
36  
37  
38  
39  
40  
41  
42  
43  
44  
45  
46  
47  
48  
49  
50  
51  
52  
53  
54  
55  
56  
57  
58  
59  
60

For peer review only



# BMJ Open

## Physical Therapy and Orthopedic Equipment-induced Reduction in the Biomechanical Risk Factors Related to Knee Osteoarthritis: A systematic review and Bayesian network meta-analysis of randomized controlled trials

|                                 |                                                                                                                                                                                                                                                                                                                                                              |
|---------------------------------|--------------------------------------------------------------------------------------------------------------------------------------------------------------------------------------------------------------------------------------------------------------------------------------------------------------------------------------------------------------|
| Journal:                        | <i>BMJ Open</i>                                                                                                                                                                                                                                                                                                                                              |
| Manuscript ID                   | bmjopen-2021-051608.R2                                                                                                                                                                                                                                                                                                                                       |
| Article Type:                   | Original research                                                                                                                                                                                                                                                                                                                                            |
| Date Submitted by the Author:   | 05-Jan-2022                                                                                                                                                                                                                                                                                                                                                  |
| Complete List of Authors:       | Huang, XiMeng; Peking University Third Hospital<br>Yuan, Fu-Zhen; Peking University Third Hospital<br>Chen, You-Rong; Peking University Third Hospital<br>Huang, Ying; Peking Union Medical College Hospital<br>Yang, Ze-Xi; Peking University Third Hospital<br>Lin, Lin; Peking University Third Hospital<br>Yu, Jia-Kuo; Peking University Third Hospital |
| <b>Primary Subject Heading</b>: | Sports and exercise medicine                                                                                                                                                                                                                                                                                                                                 |
| Secondary Subject Heading:      | Evidence based practice, Rehabilitation medicine                                                                                                                                                                                                                                                                                                             |
| Keywords:                       | Biophysics < NATURAL SCIENCE DISCIPLINES, Adult orthopaedics < ORTHOPAEDIC & TRAUMA SURGERY, Knee < ORTHOPAEDIC & TRAUMA SURGERY, REHABILITATION MEDICINE                                                                                                                                                                                                    |
|                                 |                                                                                                                                                                                                                                                                                                                                                              |

SCHOLARONE™  
Manuscripts

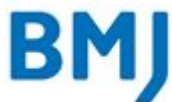

I, the Submitting Author has the right to grant and does grant on behalf of all authors of the Work (as defined in the below author licence), an exclusive licence and/or a non-exclusive licence for contributions from authors who are: i) UK Crown employees; ii) where BMJ has agreed a CC-BY licence shall apply, and/or iii) in accordance with the terms applicable for US Federal Government officers or employees acting as part of their official duties; on a worldwide, perpetual, irrevocable, royalty-free basis to BMJ Publishing Group Ltd ("BMJ") its licensees and where the relevant Journal is co-owned by BMJ to the co-owners of the Journal, to publish the Work in this journal and any other BMJ products and to exploit all rights, as set out in our [licence](#).

The Submitting Author accepts and understands that any supply made under these terms is made by BMJ to the Submitting Author unless you are acting as an employee on behalf of your employer or a postgraduate student of an affiliated institution which is paying any applicable article publishing charge ("APC") for Open Access articles. Where the Submitting Author wishes to make the Work available on an Open Access basis (and intends to pay the relevant APC), the terms of reuse of such Open Access shall be governed by a Creative Commons licence – details of these licences and which [Creative Commons](#) licence will apply to this Work are set out in our licence referred to above.

Other than as permitted in any relevant BMJ Author's Self Archiving Policies, I confirm this Work has not been accepted for publication elsewhere, is not being considered for publication elsewhere and does not duplicate material already published. I confirm all authors consent to publication of this Work and authorise the granting of this licence.

1 **Title: Physical Therapy and Orthopedic Equipment-induced Reduction in the**  
 2 **Biomechanical Risk Factors Related to Knee Osteoarthritis: A systematic review**  
 3 **and Bayesian network meta-analysis of randomized controlled trials**

4 **Authors:** Xi-Meng Huang<sup>1\*</sup>, MD; Fu-Zhen Yuan<sup>1\*</sup>, MD; You-Rong Chen<sup>1</sup>, MD; Ying  
 5 Huang<sup>2</sup>, MD; Ze-Xi Yang<sup>3</sup>, MD; Lin Lin<sup>1</sup>, MD; Jia-Kuo Yu<sup>1</sup>, MD&PhD

6 1. Institute of Sports Medicine, Peking University Third Hospital, Beijing Key  
 7 Laboratory of Sports Injuries, Beijing, 100191, China

8 2. Peking Union Medical College, Plastic Surgery Hospital, Chinese Academy of  
 9 Medical Sciences, Beijing, China.

10 3. Department of Orthopedic, Peking University Third Hospital, Beijing, 100191,  
 11 China

12 Xi-Meng Huang: [1510301201@pku.edu.cn](mailto:1510301201@pku.edu.cn)

13 Fu-Zhen Yuan: [yuanfuzhen2009@sina.com](mailto:yuanfuzhen2009@sina.com)

14 You-Rong Chen: [chenyourong1990@qq.com](mailto:chenyourong1990@qq.com)

15 Ying Huang: [1510122916@pku.edu.cn](mailto:1510122916@pku.edu.cn)

16 Ze-Xi Yang: [15101301202@pku.edu.cn](mailto:15101301202@pku.edu.cn)

17 Lin Lin: [simon.lin2003@163.com](mailto:simon.lin2003@163.com)

18 Jia-Kuo Yu: [yujiakuo@126.com](mailto:yujiakuo@126.com); Tel: 86-10-1861290798

19 First author: Xi-Meng Huang and Fu-Zhen Yuan

20 Corresponding author: Lin Lin and Jia-Kuo Yu

21 **Full correspondence details (for review) for contact purposes only:**

|             |                                                                                                              |
|-------------|--------------------------------------------------------------------------------------------------------------|
| Name        | Jia-Kuo Yu                                                                                                   |
| Institution | Institute of Sports Medicine, Peking University Third Hospital,<br>Beijing Key Laboratory of Sports Injuries |
| Country     | China                                                                                                        |
| Tel         | 86-10-1861290798                                                                                             |
| Mob         | Nil                                                                                                          |
| Fax         | Nil                                                                                                          |
| Email       | <a href="mailto:yujiakuo@126.com">yujiakuo@126.com</a>                                                       |

22 **Full correspondence (for publication) for contact purposes only:**

|             |                                                                                                              |
|-------------|--------------------------------------------------------------------------------------------------------------|
| Name        | Jia-Kuo Yu                                                                                                   |
| Institution | Institute of Sports Medicine, Peking University Third Hospital,<br>Beijing Key Laboratory of Sports Injuries |
| Country     | China                                                                                                        |

Knee osteoarthritis (KOA); Knee adduction moment (KAM); Knee adduction angular impulse (KAAI)

|       |                                                        |
|-------|--------------------------------------------------------|
| Email | <a href="mailto:yujiakuo@126.com">yujiakuo@126.com</a> |
|-------|--------------------------------------------------------|

- 1  
2  
3  
4  
5 23 **Abbreviated title:** Biomechanical Phenomena, Osteoarthritis, Knee, Physical and  
6 24 Rehabilitation Medicine  
7 25 **Key words:** Physical Therapy; Orthopedic Equipment; Knee Osteoarthritis;  
8 26 KAM; KAAI; Bayesian Network Meta-analysis.  
9  
10 27 **Word Count:** 295words (Abstract)  
11 28 4094words (Introduction, Method, Results, Discussion)  
12 29 **References:** 69  
13 30 **Tables:** 3  
14 31 **Figures:** 4  
15 32 **eAddenda:** 1  
16 33 **Ethics approval:** Nil  
17 34 **Competing interests:** Nil  
18  
19 35 **Source(s) of support:** This work was supported by the National Key R&D Program of  
20 36 China (No.2017YFB1303000) and the Construction of a Basic  
21 37 Public Service Platform for Industrial Technology in the Field  
22 38 of Advanced Medical Equipment (0714-EMTC-02-00897).  
23  
24 39 **Correspondence:** Jia-Kuo Yu, Institute of Sports Medicine, Peking University Third  
25 40 Hospital, Beijing Key Laboratory of Sports Injuries, China,  
26 41 [yujiakuo@126.com](mailto:yujiakuo@126.com)  
27  
28  
29  
30  
31  
32  
33  
34  
35  
36  
37  
38  
39  
40  
41  
42  
43  
44  
45  
46  
47  
48  
49  
50  
51  
52  
53  
54  
55  
56  
57  
58  
59  
60

Knee osteoarthritis (KOA); Knee adduction moment (KAM); Knee adduction angular impulse (KAAI)

1  
2  
3  
4 66 **ABSTRACT**  
5

6 67 *Objective:* Are physical therapy or orthopedic equipment efficacious in reducing the  
7  
8  
9 68 biomechanical risk factors in people with tibiofemoral OA? Is there a better therapeutic  
10  
11  
12 69 intervention than others to improve these outcomes?  
13

14 70 *Design:* Systematic review with network meta-analysis of randomized trials.  
15

16  
17 71 *Data sources:* PubMed, Web of Science, Cochrane Library, Embase, and MEDLINE  
18  
19 72 were searched through January 2021.  
20  
21

22 73 *Eligibility criteria for selecting studies:* We included randomized controlled trials  
23  
24 74 exploring the benefits of using physical therapy or orthopedic equipment in reducing  
25  
26  
27 75 the biomechanical risk factors which included KAM and KAAI in individuals with  
28  
29  
30 76 tibiofemoral OA.  
31

32 77 *Data extraction and synthesis:* Two authors extracted data independently and assessed  
33  
34  
35 78 risk of bias. We conducted a network meta-analysis to compare multiple interventions,  
36  
37  
38 79 including both direct and indirect evidences. Heterogeneity was assessed (sensitivity  
39  
40 80 analysis) and quantified ( $I^2$  statistic). GRADE assessed the certainty of the evidence.  
41  
42

43 81 *Results:* Eighteen randomized controlled trials, including 944 participants, met the  
44  
45 82 inclusion criteria, of which 14 trials could be included in the NMA. Based on the  
46  
47  
48 83 collective probability of being the overall best therapy for reducing the first peak KAM,  
49  
50  
51 84 lateral wedge insoles (LWI) plus knee brace was closely followed by gait retraining,  
52  
53 85 and knee brace only. Although no significant difference was observed among the eight  
54  
55  
56 86 interventions, variable-stiffness shoes and neuromuscular exercise exhibited an  
57  
58 87 increase in the first peak KAM compared to the control condition group. And based on  
59  
60

Knee osteoarthritis (KOA); Knee adduction moment (KAM); Knee adduction angular impulse (KAAI)

1  
2  
3  
4 88 the collective probability of being the overall best therapy for reducing KAAI, gait  
5  
6 89 retraining was followed by LWI only, and lower limb exercise.  
7  
8

9 90 *Conclusion:* The results of our study support the use of LWI plus knee brace for  
10  
11 91 reducing the first peak KAM. Gait retraining did not rank highest but it influenced both  
12  
13  
14 92 KAM and KAAI and therefore it was the most recommended therapy for reducing the  
15  
16  
17 93 biomechanical risk factors.  
18

#### 19 94 **Strengths and limitations**

20  
21  
22 95 ① The Bayesian method provided the probability estimates regarding the relative  
23  
24 96 efficacy of specific interventions, even though standard methods found no  
25  
26  
27 97 significant differences among them.  
28

29  
30 98 ② Physical therapies and orthopedic equipment are complex interventions with a  
31  
32 99 small number of trials comparing the different types of interventions.  
33

34  
35 100 ③ Besides KAM and KAAI, we were unable to include other biomechanical risk  
36  
37 101 factors, such as the external knee flexion moment to joint load, because the number  
38  
39  
40 102 of these studies was not enough to form a complete NMA.  
41

42  
43 103 ④ Heterogeneity in NMA may reduce the validity of the results.  
44  
45  
46 104  
47  
48 105  
49

## 50 106 **1. INTRODUCTION**

51  
52  
53 107 Knee osteoarthritis (KOA), an chronic progressive disease, affects approximately  
54  
55 108 3.8% of people worldwide and frequently occurs in the middle-aged and the elderly  
56  
57  
58 109 population.<sup>1</sup> The main clinical manifestation of KOA is knee pain and is often  
59  
60

1  
2  
3  
4 110 accompanied by radiographic degeneration of the intra-articular cartilage associated  
5  
6 111 with hypertrophic bone changes.<sup>2</sup> Furthermore, the KOA development often leads  
7  
8  
9 112 to knee stiffness, joint locking, and instability, along with functional loss. Though  
10  
11  
12 113 it is not fatal, the persistent pain and movement restrictions associated with this  
13  
14 114 condition negatively impact the physical and mental health of the patients, thus,  
15  
16  
17 115 reducing their quality of life.<sup>3</sup>  
18  
19 116 These pathological changes in knee joints are a cumulative result of various  
20  
21  
22 117 biomechanical imbalances leading to the progression of the disease and are now  
23  
24 118 believed to be associated with malalignment of the lower limb.<sup>4</sup> Tibiofemoral OA  
25  
26  
27 119 most commonly occurs in the medial compartment, since several studies have stated  
28  
29  
30 120 that patellofemoral compartment is as prevalent as medial tibiofemoral joint.<sup>5,6</sup> The  
31  
32  
33 121 external knee adduction moment (KAM) results from the unequal distribution of  
34  
35  
36 122 the transmitted load on both sides in the normal gait of humans. It is defined as the  
37  
38  
39 123 cross product of the ground reaction force and the distance between the knee joint  
40  
41  
42 124 and the force line.<sup>7</sup> Individuals with obesity,<sup>8</sup> meniscal lesions,<sup>9</sup> occupational  
43  
44  
45 125 loads,<sup>10</sup> or other associated risk factors tend to have a frontal plane knee  
46  
47  
48 126 malalignment, which alters the normal force line and forces the medial knee joint  
49  
50  
51 127 to bear more load and thus, leads to increased KAM.<sup>11,12</sup> The accumulation effect  
52  
53  
54 128 of the moment is determined by calculating the integral of the moment to time,  
55  
56  
57 129 which is also called knee adduction angular impulse (KAAI). It reflects the change  
58  
59  
60 130 in knee joint rotation state during a stance period of gait.<sup>13</sup> Previous studies have  
131 revealed a strong correlation between the peak levels of KAM and KAAI and the

Knee osteoarthritis (KOA); Knee adduction moment (KAM); Knee adduction angular impulse (KAAI)

1  
2  
3  
4 132 severity and progression of the disease, which was reflected and calculated by the  
5  
6 133 loss of medial tibial cartilage.<sup>14,15</sup> Both these biomechanical parameters (KAM and  
7  
8  
9 134 KAAI) are commonly utilized to evaluate the medial knee load and predict the long-  
10  
11  
12 135 term structural deterioration of the knee.

13  
14 136 Recent advancements in healthcare have resulted in the development of several  
15  
16  
17 137 protocols for the intervention and treatment of KOA. KOA patients are primarily  
18  
19 138 recommended physical therapy or orthopedic equipment with the intention of  
20  
21  
22 139 correcting the deviated force line and delaying the progressive pathological damage  
23  
24  
25 140 inside the knee joint.<sup>7</sup> Some other modalities, such as ultrasound and Taiji programs,  
26  
27 141 primarily focus on relieving the pain, and therefore, this might improve the  
28  
29  
30 142 biomechanical state of the knee joint.<sup>16,17</sup> The physical therapy mainly includes  
31  
32  
33 143 muscular strengthening, exercise therapy, electric stimulation therapy,  
34  
35 144 extracorporeal shockwave therapy and gait modification, while orthopedic  
36  
37  
38 145 equipment mainly incorporates customized shoes/footwear, wedged insoles, and  
39  
40  
41 146 knee braces.

42  
43 147 Several literary insights have shown the positive impact of physical therapy or  
44  
45  
46 148 orthopedic equipment in KOA patients.<sup>13,18,19</sup> The strengthening of related lower  
47  
48  
49 149 limb muscles, which play a vital role in disease progression, are known to reduce  
50  
51  
52 150 instability and abnormal stresses across the joint.<sup>20,21</sup> Another study displayed a  
53  
54  
55 151 lower knee joint loading rate in patients with stronger quadriceps and hamstrings.<sup>22</sup>  
56  
57  
58 152 Additionally, gait training presents a viable way for correcting the patients'  
59  
60 153 underlying gait pattern, thus, further reducing their knee load and pain.<sup>23,24</sup>



1  
2  
3  
4 154 Furthermore, various kinds of orthotic devices have been introduced for the  
5  
6 155 treatment of KOA. The clinical use of lateral wedge insoles (LWI) has gained  
7  
8  
9 156 immense popularity since its origin in 1987.<sup>25,26</sup> The insoles tends to shift the lateral  
10  
11  
12 157 part of the foot more than the medial part by a slope that increases the valgus  
13  
14 158 tendency of lower extremities. The center of the ground reaction force is shifted  
15  
16  
17 159 laterally, which induces a reduction in force lever arm length and magnitude.<sup>27</sup> Also,  
18  
19 160 the valgus knee brace is a commonly used device. It applies an external valgus force  
20  
21  
22 161 around the knee joint to reduce the medial knee load.

23  
24 162 In the past, several systematic reviews and meta-analyses have been published  
25  
26  
27 163 featuring the medical effects of a single KOA treatment. However, only a few of  
28  
29  
30 164 them have focused on multifaceted interventions. Also, only a few reviews have  
31  
32  
33 165 reported the effects on biomechanical parameters. The mechanical changes in the  
34  
35 166 body were not sufficiently investigated. Current reviews on KAM and KAAI have  
36  
37  
38 167 also not compared these changes. Thus, a network meta-analysis (NMA) was  
39  
40  
41 168 performed to appraise the benefits of physical treatments or orthopedic equipment  
42  
43 169 in reducing biomechanical risk factors in KOA patients.

44  
45 170 Therefore, the research questions for this systematic review were:

- 46  
47  
48 171 1. Are physical therapies or orthopedic equipment efficacious in reducing the  
49  
50  
51 172 biomechanical risk factors in people with KOA?  
52  
53 173 2. Is there a better therapeutic intervention than others to improve these outcomes?  
54  
55

## 56 174 2. METHODS

57  
58 175 All pooled analyses were derived from previous studies and, therefore, did not  
59  
60

1  
2  
3  
4 176 require ethical approval and informed consent.  
5

6  
7 177 **2.1 Identification and selection of studies.**  
8

9 178 The following databases were searched for listed randomized controlled trials that  
10  
11 179 were published before January 2021: PubMed, Web of Science, Cochrane Library,  
12  
13  
14 180 Embase, and MEDLINE. These studies explored the benefits of using physical  
15  
16  
17 181 therapy or orthopedic equipment in reducing the biomechanical risk factors  
18  
19 182 including KAM and KAAI in patients with tibiofemoral OA. The search was not  
20  
21  
22 183 restricted by date, publication type, or status (see Appendix 1). Additionally, we  
23  
24  
25 184 performed manual analyses of the published references regarding the use of  
26  
27 185 physical therapy or orthopedic equipment for treating KOA.

28  
29  
30 186 The eligibility of searched publications was independently reviewed by HXM and  
31  
32 187 YZX following the Cochrane manual directives.<sup>28</sup> Any additional inconsistencies  
33  
34  
35 188 were resolved either by deliberation or by a senior expert (HY). Firstly, the study  
36  
37  
38 189 titles and abstracts, published in English literature, were screened. Next, the  
39  
40  
41 190 complete articles were reviewed against the directed criteria described in box 1.  
42  
43 191 Eligible comparison subjects, including standard/conventional care or waiting list  
44  
45 192 control (analgesic advice and education), were defined as “control condition.”  
46  
47  
48 193 Control condition also included placebo intervention, no intervention, and sham-  
49  
50  
51 194 exercise. This NMA defined lower limb exercise as the simultaneous exercise of  
52  
53 195 multiple muscle groups that included hip abductors, quadriceps, and hamstrings.  
54  
55  
56 196 Since our research needed to maintain clinical and statistical homogeneity and focus  
57  
58 197 on the residual biomechanical effects after the intervention, only those articles were  
59  
60

1  
2  
3  
4 198 selected whose measurements were strictly obtained under the condition of going  
5  
6 199 barefoot.

7  
8  
9 200 The exclusion criteria included: (1) studies that were not consistent with the  
10  
11 201 eligibility criteria; (2) experimental peer-reviewed studies; (3) studies that included  
12  
13  
14 202 participants who had received surgical treatment in the past; (4) studies that did not  
15  
16  
17 203 report KAM or KAAI.

## 18 19 20 204 **2.2 Data Collection and Quality assessment.**

21  
22 205 KAM and KAAI were the preferred biomechanical measures used in this meta-  
23  
24 206 analysis. The biomechanical outcomes of the studies included in the Bayesian  
25  
26  
27 207 network meta-analysis were measured on flat ground or treadmills. Additionally,  
28  
29  
30 208 the number of trials focusing on the second peak of KAM was insufficient to  
31  
32  
33 209 conduct an independent NMA.

34  
35 210 The data were extracted independently by two authors (HXM, YZX) and were  
36  
37  
38 211 cross-checked. A predefined information sheet was used for data extraction, which  
39  
40  
41 212 included the details of the first author (name), country, the year of publication,  
42  
43  
44 213 population characteristics, intervention, and the time points. The authors of the  
45  
46  
47 214 original study were contacted in the cases requiring more data.

## 48 215 **2.3 Assessment of characteristics of studies.**

### 49 50 51 216 *Risk of bias*

52  
53 217 This NMA utilized the Cochrane Risk of Bias 2 (RoB2) to assess the risk of bias in  
54  
55  
56 218 randomized controlled trials using the following evaluation indicators:  
57  
58  
59 219 randomization process, deviations from the intended interventions, missing  
60

1  
2  
3  
4 220 outcome data, outcome measurement, and selection of the reported results.<sup>21</sup> The  
5  
6 221 judgment of the bias risk of this item was presented as "low," "high," and "some  
7  
8  
9 222 concerns." Two authors independently evaluated the risk of bias in all the included  
10  
11 223 studies. The authors discussed or referred to the opinion of a senior author to resolve  
12  
13  
14 224 any disagreements. Additionally, the certainty of evidence the evidence was also  
15  
16  
17 225 evaluated, which contributed to network estimates of the main outcomes with the  
18  
19 226 Grading of Recommendations Assessment, Development and Evaluation (GRADE)  
20  
21  
22 227 framework.<sup>29</sup>

### 228 *Intervention*

229 In order to describe the experimental interventions, the following information was  
230 extracted: the training method with further relevant details, the details and  
231 characteristics of orthopedic equipment, and the frequency as well as the total  
232 duration of training or wearing.

### 233 *Outcome measures*

234 Baseline biomechanical risk factors were extracted from the walking trials without  
235 any orthopedic equipment before the intervention, while post-intervention  
236 biomechanical risk factors were extracted from walking trials that incorporated  
237 orthopedic equipment. Biomechanical risk factors included in the study were the  
238 first peak KAM, the second peak KAM and KAAI. KAM was normalized as %body  
239 weight times height, with conversion to Nm/kg wherever necessary. KAAI was  
240 designated as the moment accumulation rate, which was determined by calculating  
241 the integral of the moment to time.

## 242 2.4 Statistical Analysis.

243 A network meta-analysis was carried out for comparing multiple interventions,  
244 including both direct (direct comparison of treatment modalities) and indirect  
245 evidence (indirect comparison of various treatments with a common control),  
246 maintaining randomization in each independent study.<sup>30-32</sup> Interventions, as well as  
247 different demographic characteristics were either consistent or comparable in all  
248 included studies,<sup>30,33-37</sup> while those studies were excluded that reported immediate  
249 treatment effects.

250 Due to different units, the continuous data used the standard mean difference (SMD)  
251 as the statistical indicator of the effect, and the Frequentist 95% confidence interval  
252 (CI) of each effect was calculated. Additionally, the  $I^2$  statistic was utilized to  
253 analyze the overall heterogeneity of the two-arm study and the network. The fixed-  
254 effect model was suggested to be used in cases of the absence of statistical  
255 heterogeneity ( $p > 0.05$ ,  $I^2 < 50\%$ ); however, given the heterogeneity among the  
256 studies, a random-effects model for meta-analysis was used.<sup>38</sup> A sensitivity analysis  
257 (see Appendix 2, eFigure 1 and 2) was conducted by omitting one study and  
258 investigating the influence of the single study on the overall pooled estimate to  
259 evaluate the source of heterogeneity. The node-split model was used for evaluating  
260 the testing consistency (see Appendix 3, eFigure 3). If  $p > 0.05$ , then the consistency  
261 model was used for analysis; otherwise, the inconsistency model was utilized.<sup>39</sup>  
262 Normal likelihood distributions were assumed, non-informative prior distributions  
263 were set, and three Markov chains were run simultaneously. Since the number of

1  
2  
3  
4 264 update iterations was 50,000, a total of 5000 simulations were used for annealing,  
5  
6 265 and the subsequent 45,000 iterations were examined. The mean rank and surface  
7  
8  
9 266 under the cumulative ranking curve (SUCRA) were used for reporting the  
10  
11 267 probability values. A SUCRA value of 100% was considered best, whereas 0%  
12  
13  
14 268 indicated the worst treatment.<sup>40</sup> Besides, a conventional meta-analysis was also  
15  
16  
17 269 carried out (see Appendix 4, eFigure 4a, b, and c). Comparison-adjusted funnel  
18  
19  
20 270 plots were prepared that represented different comparisons with different colors.  
21  
22 271 The data from the eligible studies were combined using the Review Manager  
23  
24 272 (RevMan) software v5.3. The contribution of the effect sizes was dependent on the  
25  
26  
27 273 sample size and their estimation accuracy. The Bayesian analyses were carried out  
28  
29  
30 274 using WinBUGs v1.4.3. Stata (StataCorp. 2015. Stata Statistical Software: Release  
31  
32 275 15. College Station, TX: StataCorp LP) was employed to conduct the frequentist  
33  
34  
35 276 NMA.

## 37 277 **2.5 Patient and Public Involvement.**

38  
39  
40 278 No patients were directly involved in the development of the study question,  
41  
42  
43 279 selection of the outcome measures, design and implementation of the study, or  
44  
45  
46 280 explanation of the results.

## 47 48 281 **3. RESULTS**

### 49 50 282 **3.1 Flow of studies through the review**

51  
52  
53 283 A comprehensive investigation of databases retrieved 4919 citations. After  
54  
55  
56 284 screening articles by title and abstract, and deleting duplicate articles, we identified  
57  
58  
59 285 526 studies that might meet the criteria for inclusion, and then we searched and  
60

1  
2  
3  
4 286 evaluated their full text. Figure 1 presents the study selection flow chart. Eighteen  
5  
6 287 randomized controlled trials, including 944 participants, met the inclusion  
7  
8  
9 288 criteria.<sup>23,41-57</sup> Since the present NMA only considered trials comparing the nine  
10  
11 289 treatments with control condition or each other (see Appendix 5, eFigure 5a and b),  
12  
13  
14 290 only fourteen trials (792 participants) were included. Furthermore, four trials were  
15  
16  
17 291 excluded from the NMA considering their excessive heterogeneity and inability to  
18  
19 292 form NMA with other studies.<sup>54-57</sup>

### 22 293 **3.2 Characteristics of included studies**

24 294 All studies included tibiofemoral OA cases, which were radiologically confirmed.  
25  
26  
27 295 Although most interventions were administered over an 8–13week period, the  
28  
29  
30 296 treatment duration ranged from 2 weeks to 12 months. The number of exercises  
31  
32 297 varied from 2-5 times per week, depending on the initial preparation.<sup>43,44,46,49</sup> Both  
33  
34  
35 298 gait training studies used the faded feedback paradigm, which meant gradual  
36  
37  
38 299 removal of the real-time biofeedback.<sup>23,48</sup> As NMA included fourteen studies, nine  
39  
40 300 were classified as Kellgren/Lawrence grade 2 and above. All studies reported either  
41  
42  
43 301 the values for BMI or height and weight, while the studies recruiting a general  
44  
45  
46 302 population classified the mean BMI as overweight or obese. Additionally, one  
47  
48 303 NMA study had a randomized crossover design.<sup>50</sup> After consulting a reference  
49  
50  
51 304 manual along with a professional statistician, the mean and standard deviation of  
52  
53  
54 305 the experimental and the control groups were analyzed in this network meta-  
55  
56 306 analysis.<sup>28</sup> Tables 1 and 2 summarize the characteristics of the included studies and  
57  
58 307 their participants.  
59  
60

### 308 3.3 KAM.

309 According to the collective probability of being the overall best therapy for reducing  
310 the first peak KAM, LWI plus knee brace (93.4%) was closely followed by gait  
311 retraining (85.7%), and knee brace only (79.3%) (Figure 2). A study reported that  
312 the VER-brace offers additional advantages on first peak KAM compared to V3P-  
313 brace and ACL-brace.<sup>54</sup> No first peak KAM reduction was observed between  
314 proprioceptive neuromuscular facilitation group and controls,<sup>55</sup> and the result of the  
315 study of minimal footwear was the same.<sup>56</sup> On the other hand, after the  
316 electroacupuncture treatment, compared with the control group, the second peak  
317 KAM significantly increased immediately when the patient ascended stairs.<sup>57</sup> Table  
318 3 shows the NMA results of a comparative analysis of the reduction of the first peak  
319 KAM. We found no differences in most of the treatment modalities; however,  
320 variable-stiffness shoes showed a statistically significant increase in the first peak  
321 KAM over the rest of the included interventions. Neuromuscular exercise was better  
322 than variable-stiffness shoes, but was still inferior to most other interventions. At  
323 the same time, lateral wedge insole plus knee brace and gait retraining performed  
324 relatively well in reducing the first peak KAM compared with control condition and  
325 other treatments.

### 326 3.4 KAAI.

327 Based on the collective probability of being the overall best therapy for reducing  
328 KAAI, gait retraining (90.7%) was followed by LWI only (74.1%), and lower limb  
329 exercise (53.8%) (Figure 3). KAAI was reported in ten studies.<sup>42-44,47-50,53,54,56</sup> After



1  
2  
3  
4 330 wearing the three kinds of brace separately, the KAAI measured without brace did  
5  
6 331 not decrease significantly, and there was no significant difference between the  
7  
8  
9 332 groups.<sup>54</sup> Table 3 shows the NMA results of the reduction of KAAI. Most  
10  
11 333 treatments were not statistically different from each other, consistent with the  
12  
13  
14 334 results of the first peak KAM. Only gait retraining had a statistical reduction  
15  
16  
17 335 compared with control condition. The aggregated results suggested that gait  
18  
19  
20 336 retraining is efficacious in reducing the KAAI, while neuromuscular exercise  
21  
22 337 increased the KAAI compared with gait retraining and knee brace.

### 23 24 25 338 **3.5 Heterogeneity.**

26  
27 339 We removed a study which had a short follow-up time and might cause  
28  
29  
30 340 heterogeneity,<sup>50</sup> and performed another network meta-analysis. There was no  
31  
32  
33 341 difference between the results of the reanalysis and the current ranking (see  
34  
35 342 Appendix 2, eFigure 1 and 2).

### 36 37 38 343 **3.6 GRADE assessment**

39  
40 344 According to the GRADE framework (see Appendix 6), the quality of most  
41  
42  
43 345 comparisons was assessed as low or very low. Only neuromuscular exercise  
44  
45  
46 346 compared with control condition, neuromuscular exercise compared with LWI,  
47  
48  
49 347 neuromuscular exercise compared with knee brace, and neuromuscular exercise  
50  
51 348 compared with LWI plus knee brace were evaluated as a moderate-grade  
52  
53 349 comparison.

### 54 55 56 350 **3.7 Risk of bias.**

57  
58 351 Figure 4 depicts a summary of the risk-of-bias scores for the included RCTs in this  
59  
60

1  
2  
3  
4 352 analysis. Nine studies presented a clear description of generating a randomization  
5  
6 353 sequence.<sup>43-47,49,52,56,57</sup> The study by Hinman et al. was the only double-blinded  
7  
8  
9 354 study, while other studies were either single-blinded or did not clearly describe their  
10  
11 355 blind design. All trials provided follow-up data on their outcomes. Six studies did  
12  
13  
14 356 not report the patient number or the reason for lost visits due to the length of follow-  
15  
16  
17 357 up.<sup>23,44-46,50,52</sup> All studies were included in the synthesis evaluation. The  
18  
19 358 comparison-adjusted funnel plots were symmetrically distributed based on a visual  
20  
21  
22 359 inspection, which suggested the absence of small-sample effects for our study  
23  
24  
25 360 outcomes (see Appendix 7, eFigure 6a and 6b).

#### 27 361 4. DISCUSSION

28  
29  
30 362 Our study results did not show any significant difference regarding the relative  
31  
32 363 efficacy of intervention among different types of physical therapies or orthopedic  
33  
34  
35 364 equipment. This lack of difference might be attributed to the fact that the number  
36  
37  
38 365 of studies for several pairwise comparisons was small. However, some of these  
39  
40  
41 366 therapies were still worth recommending. Due to a small number of studies studying  
42  
43 367 the outcome of the KAAI, we found gait retraining to be the relatively more  
44  
45  
46 368 convincing intervention as it could simultaneously reduce the values for KAM and  
47  
48  
49 369 KAAI values based on cumulative ranking and relative effect estimates. Due to the  
50  
51 370 lack of significant differences among the interventions, the cumulative ranking  
52  
53  
54 371 obtained by the network meta-analysis could not be conclusively accepted. For  
55  
56 372 example, gait retraining, which was employed as the foremost intervention (90.7%)  
57  
58  
59 373 for KAAI reduction, was only superior to the neuromuscular exercise interventions.  
60

1  
2  
3  
4 374 This study had several strengths and limitations. This NMA is the first report on the  
5  
6 375 effects of physical therapy or orthopedic equipment on the parameters of knee load  
7  
8  
9 376 (KAM, KAAI). Since physical therapies and orthopedic equipment are complex  
10  
11 377 interventions with a small number of trials comparing the different types of  
12  
13  
14 378 interventions, network meta-analysis was deemed as the most relevant form of  
15  
16  
17 379 analysis. The results of this meta-analysis could be more useful for the decision-  
18  
19 380 makers and primary service providers for choosing wisely among the various  
20  
21  
22 381 available options, as compared to the multiple separate pairwise meta-analyses.<sup>58</sup>  
23  
24  
25 382 Additionally, this NMA conducted each comparison distinctly with both direct and  
26  
27 383 indirect statistical effects, deriving statistical power from all included data.<sup>58</sup> Also,  
28  
29  
30 384 the Bayesian method provided the probability estimates regarding the relative  
31  
32  
33 385 efficacy of specific interventions, even though the standard methods described the  
34  
35 386 absence of a significant difference between them. Furthermore, alternative rankings  
36  
37  
38 387 (second, third best, etc.) were calculated to provide overall feasibility due to  
39  
40  
41 388 unavailability of the best-suited interventions, more expensive therapies, or  
42  
43 389 contraindications in some cases. As with most meta-analyses based on non-surgical  
44  
45  
46 390 therapies for osteoarthritis, one of the limitations of this NMA was the inclusion of  
47  
48 391 trials that had variable periods of follow-up, which might have introduced  
49  
50  
51 392 heterogeneity into the study analyses. The Cochrane handbook recommends several  
52  
53 393 methods for analyzing and comparing trials with multiple durations of follow-up,  
54  
55  
56 394 as recommended by the Cochrane handbook, such as performing individual patient  
57  
58 395 data meta-analysis and a precise evaluation at a particular time point. However,  
59  
60

Knee osteoarthritis (KOA); Knee adduction moment (KAM); Knee adduction angular impulse (KAAI)

1  
2  
3  
4 396 newer approaches are now being developed that would include all the time points  
5  
6 397 in a NMA.<sup>28</sup> Our study was unable to evaluate the influence of population  
7  
8  
9 398 characteristics (such as mean age, the severity of osteoarthritis), as the number of  
10  
11 399 the included studies was not large enough.<sup>59-61</sup> Additionally, other parameters, such  
12  
13  
14 400 as the external knee flexion moment to joint load, should have been studied in detail.  
15  
16  
17 401 However, due to lesser available literature, our study was unable to include them.  
18  
19 402 Finally, standard/conventional care, placebo intervention, no intervention, sham-  
20  
21  
22 403 exercise, analgesic advice and education were all considered as the same parameter  
23  
24  
25 404 in defining the 'control condition'. Therefore, the relative rankings in our study  
26  
27  
28 405 might not represent the true factual rankings as compared to actual standard care  
29  
30 406 due to lack of consideration of bias introduced by heterogeneity and lack of blinding.  
31  
32  
33 407 A previous review reported that LWIs were able to reduce the KAM at the  
34  
35 408 baseline;<sup>13</sup> however, the effect was no longer observed after a specific period.  
36  
37  
38 409 Another study displayed that a month wear-in period was the longest study time in  
39  
40  
41 410 which no reduction in biochemical risk factors was observed despite continued  
42  
43 411 wear.<sup>18</sup> Besides, several other systematic reviews stated that exercise and gait  
44  
45  
46 412 retraining could further reduce pain and improve motor functioning in people with  
47  
48 413 KOA.<sup>62-64</sup> There is a high probability that any clinical changes occurring in previous  
49  
50  
51 414 studies might be due to increased physical activity levels, and not owing to the  
52  
53  
54 415 altered loading environment within the knee joint. Furthermore, another study  
55  
56 416 revealed that an increase in the amount of reduction in peak KAM in LWIs plus  
57  
58  
59 417 knee brace group was observed after four weeks.<sup>65</sup> In our NMA, we focused on the  
60

1  
2  
3  
4 418 studies of non-immediate effect, removed the research with a follow-up time of less  
5  
6 419 than one month in the sensitivity analysis, and made the final rank. Our results  
7  
8  
9 420 showed that only gait training produces a significant reduction in KAM and KAAI  
10  
11 421 when compared with control condition, indicating that the biomechanical reduction  
12  
13  
14 422 effect of orthopedic equipment cannot be maintained for a long time when they are  
15  
16  
17 423 donned. It was evident that an extension of the treatment time led to a decrease in  
18  
19 424 the biomechanical reduction effect, which might be due to the gradual deformation  
20  
21  
22 425 of the orthopedic equipment that renders them ineffective, despite being made from  
23  
24  
25 426 high-density materials.

26  
27 427 On the other hand, various physical therapies and orthopedic equipment also should  
28  
29  
30 428 be considered for relieving patients' pain, which has been the focus of several past  
31  
32  
33 429 reviews. As an important gait parameter, the joint pain can affect the kinetics and  
34  
35 430 kinematics of walking.<sup>19</sup> A meta-analysis reported that exercise therapy had a  
36  
37  
38 431 positive impact on knee pain and kinematic function, though this relief of pain  
39  
40  
41 432 subsided with time. After proper initiation, the efficiency of physical exercise over  
42  
43 433 placebo reached a maximum level at two months.<sup>66</sup>

44  
45 434 Cumulative loading is another significant parameter regarding knee load exposure  
46  
47  
48 435 in OA.<sup>67</sup> KAAI has been proposed as another indicator for evaluating the duration  
49  
50  
51 436 and intensity of KOA load, despite the association between KAM and disease  
52  
53  
54 437 progression. According to a study lasting for a year, the loss of medial tibiofemoral  
55  
56 438 cartilage was not directly linked to KAM but was promptly related to KAAI.<sup>14</sup>

57  
58  
59 439 Although the effect of physical therapy or orthopedic equipment on KAM are short-

1  
2  
3  
4 440 lived, it might have a huge cumulative effect on the knee during the early stages of  
5  
6 441 treatment and should be considered while interpreting our NMA results.  
7  
8

9 442 Our study results are both scientifically and clinically instructive. Despite a majority  
10  
11 443 of therapies displaying a null statistical KAM and KAAI reduction, the clinical  
12  
13  
14 444 usage of these treatment modalities could significantly improve the presenting  
15  
16  
17 445 symptoms and physical activity level without increasing the biomechanical  
18  
19 446 magnitude; thus, improving the quality of life of patients with KOA. Although the  
20  
21  
22 447 results of this study suggested that wearing variable-stiffness shoes is not preferable  
23  
24 448 for long-term KAM reduction, our current study explained that variable-stiffness  
25  
26  
27 449 shoes displayed a major advantage in reducing KAM for patients with increasing  
28  
29  
30 450 walking speed.<sup>68</sup> At the same time, variable-stiffness shoes had relatively less  
31  
32 451 discomfort than equipment such as LWI. Since the studies included in this network  
33  
34  
35 452 meta-analysis mainly involves patients with medial KOA, the consolidated results  
36  
37  
38 453 would be more useful for such patients.

39  
40 454 On the other hand, a previous study reported that an increase in KAAI can explain  
41  
42 455 the significant variation in the uCTX-II levels as well as the uCTX-II:sCPII ratio in  
43  
44  
45 456 medial tibiofemoral KOA patients after controlling additional variables.<sup>49</sup> It was  
46  
47  
48 457 evident that appropriate intervention in the biomechanical structure of the knee joint  
49  
50  
51 458 in KOA patients exert a potential beneficial role on cartilage structure. Maleki et al.  
52  
53 459 reported that adopting a modified gait for reducing the KAM can decrease the pain  
54  
55  
56 460 in the medial compartment in KOA more than walking alone,<sup>69</sup> which suggests that  
57  
58 461 the KAM and KAAI of patients undergoing non-surgical approaches could be  
59  
60

1  
2  
3  
4 462 restricted to reduce pain and improve the joint function. More research is further  
5  
6 463 needed to promptly illustrate the impact of changes in knee biomechanics on the  
7  
8  
9 464 prognosis of such patients.  
10

11 465 Additionally, some other therapies have also been reported, such as Taiji,  
12  
13  
14 466 ultrasound, acoustic exercises, etc. However, due to the lack of RCT study design  
15  
16  
17 467 or the report of their biomechanical outcomes, these therapies were not included in  
18  
19  
20 468 our review. Therefore, further studies would require more research articles in these  
21  
22 469 areas for exploring the impact of various non-surgical therapies on OA patients.  
23  
24  
25 470 After accumulating evidence regarding the role of non-surgical therapy in KOA,  
26  
27 471 another similar network meta-analysis to understand the relative effectiveness of  
28  
29  
30 472 various treatment in the relevant patients.  
31

## 32 473 **5. Conclusion**

33  
34  
35 474 To conclude, this network meta-analysis provides valuable insights regarding the  
36  
37  
38 475 KAM and KAAI alterations in OA patients after the usage of physical therapy or  
39  
40  
41 476 orthopedic equipment. After integrating cumulative ranking and relative effect  
42  
43 477 estimates, LWI plus knee brace was the highest-ranking intervention despite an  
44  
45  
46 478 absence of statistical significance. Although gait retraining did not score a higher  
47  
48  
49 479 rank, it remarkably influenced both KAM and KAAI values and, therefore, was the  
50  
51 480 most recommended therapy for reducing the biomechanical risk factors. On the  
52  
53 481 contrary, variable-stiffness shoe and neuromuscular exercise should be used with  
54  
55  
56 482 caution in clinical practice. Taken together, these findings suggest that clinicians  
57  
58  
59 483 should carefully consider all appropriate treatment modalities when treating OA  
60

1  
2  
3  
4 484 patients.

5  
6  
7 485 **6. Authors' Contributions**

8  
9 486 HXM and YFZ conceived of the study, and participated in its design and  
10  
11 487 coordination and helped to draft the manuscript; YZX, HY and CRY contributed  
12  
13  
14 488 significantly to analysis and manuscript preparation; YJK and LL helped perform  
15  
16  
17 489 the analysis with constructive discussions and revised it critically for important  
18  
19  
20 490 intellectual content.

21  
22 491 **7. Competing interests**

23  
24  
25 492 There were no conflicts of interest.

26  
27 493 **8. Funding**

28  
29  
30 494 This work was supported by the National Key R&D Program of China  
31  
32 495 (No.2017YFB1303000) and the Construction of a Basic Public Service Platform  
33  
34  
35 496 for Industrial Technology in the Field of Advanced Medical Equipment (0714-  
36  
37  
38 497 EMTC-02-00897).

39  
40 498 **9. Ethics approval**

41  
42  
43 499 Not required.

44  
45 500 **10. Data availability statement**

46  
47  
48 501 No data are available.

49  
50 502 **11. Patient and public involvement**

51  
52  
53 503 Patients and/or the public were not involved in the design, or conduct, or reporting, or  
54  
55  
56 504 dissemination plans of this research.

57  
58 505 **References**

59 506 1. Safiri S, Kolahi AA, Smith E, et al. Global, regional and national burden of osteoarthritis 1990-2017:

60  
Knee osteoarthritis (KOA); Knee adduction moment (KAM); Knee adduction angular impulse (KAAI)



- 1  
2  
3 507 a systematic analysis of the Global Burden of Disease Study 2017. *Annals of the rheumatic*  
4 508 *diseases*. 2020;79(6):819-28.
- 5  
6 509 2. Turpin KM, De Vincenzo A, Apps AM, et al. Biomechanical and clinical outcomes with shock-  
7 510 absorbing insoles in patients with knee osteoarthritis: immediate effects and changes after 1  
8 511 month of wear. *Archives of physical medicine and rehabilitation*. 2012;93(3):503-8.
- 9  
10 512 3. Neogi T. The epidemiology and impact of pain in osteoarthritis. *Osteoarthritis and cartilage*.  
11 513 2013;21(9):1145-53.
- 12  
13 514 4. Tanamas S, Hanna FS, Cicuttini FM, et al. Does knee malalignment increase the risk of development  
14 515 and progression of knee osteoarthritis? A systematic review. *Arthritis and rheumatism*.  
15 516 2009;61(4):459-67.
- 16  
17 517 5. Duncan R, Peat G, Thomas E, et al. Incidence, progression and sequence of development of  
18 518 radiographic knee osteoarthritis in a symptomatic population. *Annals of the rheumatic*  
19 519 *diseases*. 2011;70(11):1944-8.
- 20  
21 520 6. Lankhorst NE, Damen J, Oei EH, et al. Incidence, prevalence, natural course and prognosis of  
22 521 patellofemoral osteoarthritis: the Cohort Hip and Cohort Knee study. *Osteoarthritis and*  
23 522 *cartilage*. 2017;25(5):647-53.
- 24  
25 523 7. Reeves ND, Bowling FL. Conservative biomechanical strategies for knee osteoarthritis. *Nature*  
26 524 *reviews Rheumatology*. 2011;7(2):113-22.
- 27  
28 525 8. Sharma L, Lou C, Cahue S, et al. The mechanism of the effect of obesity in knee osteoarthritis: the  
29 526 mediating role of malalignment. *Arthritis and rheumatism*. 2000;43(3):568-75.
- 30  
31 527 9. Rytter S, Jensen LK, Bonde JP, et al. Occupational kneeling and meniscal tears: a magnetic  
32 528 resonance imaging study in floor layers. *The Journal of rheumatology*. 2009;36(7):1512-9.
- 33  
34 529 10. Jensen LK, Mikkelsen S, Loft IP, et al. Radiographic knee osteoarthritis in floorlayers and  
35 530 carpenters. *Scandinavian journal of work, environment & health*. 2000;26(3):257-62.
- 36  
37 531 11. Block JA, Shakoor N. Lower limb osteoarthritis: biomechanical alterations and implications for  
38 532 therapy. *Current opinion in rheumatology*. 2010;22(5):544-50.
- 39  
40 533 12. Englund M. The role of biomechanics in the initiation and progression of OA of the knee. *Best*  
41 534 *practice & research Clinical rheumatology*. 2010;24(1):39-46.
- 42  
43 535 13. Arnold JB, Wong DX, Jones RK, et al. Lateral Wedge Insoles for Reducing Biomechanical Risk  
44 536 Factors for Medial Knee Osteoarthritis Progression: A Systematic Review and Meta-Analysis.  
45 537 *Arthritis care & research*. 2016;68(7):936-51.
- 46  
47 538 14. Bennell KL, Bowles KA, Wang Y, et al. Higher dynamic medial knee load predicts greater  
48 539 cartilage loss over 12 months in medial knee osteoarthritis. *Annals of the rheumatic diseases*.  
49 540 2011;70(10):1770-4.
- 50  
51 541 15. Brisson NM, Wiebenga EG, Stratford PW, et al. Baseline knee adduction moment interacts with  
52 542 body mass index to predict loss of medial tibial cartilage volume over 2.5 years in knee  
53 543 Osteoarthritis. *Journal of orthopaedic research : official publication of the Orthopaedic*  
54 544 *Research Society*. 2017;35(11):2476-83.
- 55  
56 545 16. Briem K, Snyder-Mackler L. Proximal gait adaptations in medial knee OA. *Journal of orthopaedic*  
57 546 *research : official publication of the Orthopaedic Research Society*. 2009;27(1):78-83.
- 58  
59 547 17. Yang F, Liu W. Knee joint biomechanics of simplified 24 Tai Chi forms and association with pain  
60 548 in individuals with knee osteoarthritis: A pilot study. *Osteoarthritis and cartilage open*.  
2021;3(2).
- 550 18. Hinman RS, Bowles KA, Bennell KL. Laterally wedged insoles in knee osteoarthritis: do

Knee osteoarthritis (KOA); Knee adduction moment (KAM); Knee adduction angular impulse (KAAl)

- 1  
2  
3 551 biomechanical effects decline after one month of wear? *BMC Musculoskelet Disord*.  
4 552 2009;10:146.
- 5  
6 553 19. Divine JG, Hewett TE. Valgus bracing for degenerative knee osteoarthritis: relieving pain,  
7 554 improving gait, and increasing activity. *The Physician and sportsmedicine*. 2005;33(2):40-6.
- 8  
9 555 20. Lange AK, Vanwanseele B, Fiatarone Singh MA. Strength training for treatment of osteoarthritis of  
10 556 the knee: a systematic review. *Arthritis and rheumatism*. 2008;59(10):1488-94.
- 11  
12 557 21. Liu CJ, Latham NK. Progressive resistance strength training for improving physical function in  
13 558 older adults. *The Cochrane database of systematic reviews*. 2009;2009(3):Cd002759.
- 14  
15 559 22. Mikesky AE, Meyer A, Thompson KL. Relationship between quadriceps strength and rate of  
16 560 loading during gait in women. *Journal of orthopaedic research : official publication of the*  
17 561 *Orthopaedic Research Society*. 2000;18(2):171-5.
- 18  
19 562 23. Cheung RTH, Ho KKW, Au IPH, et al. Immediate and short-term effects of gait retraining on the  
20 563 knee joint moments and symptoms in patients with early tibiofemoral joint osteoarthritis: a  
21 564 randomized controlled trial. *Osteoarthritis and cartilage*. 2018;26(11):1479-86.
- 22  
23 565 24. Shull PB, Jirattigalachote W, Hunt MA, et al. Quantified self and human movement: a review on  
24 566 the clinical impact of wearable sensing and feedback for gait analysis and intervention. *Gait &*  
25 567 *posture*. 2014;40(1):11-9.
- 26  
27 568 25. Sasaki T, Yasuda K. Clinical evaluation of the treatment of osteoarthritic knees using a newly  
28 569 designed wedged insole. *Clin Orthop Relat Res*. 1987(221):181-7.
- 29  
30 570 26. Yasuda K, Sasaki T. The mechanics of treatment of the osteoarthritic knee with a wedged insole.  
31 571 *Clin Orthop Relat Res*. 1987(215):162-72.
- 32  
33 572 27. Hinman RS, Bowles KA, Metcalf BB, et al. Lateral wedge insoles for medial knee osteoarthritis:  
34 573 effects on lower limb frontal plane biomechanics. *Clin Biomech (Bristol, Avon)*.  
35 574 2012;27(1):27-33.
- 36  
37 575 28. Higgins JPT TJ, Chandler J, Cumpston M, Li T, Page MJ, Welch VA. Cochrane Handbook for  
38 576 Systematic Reviews of Interventions version 6.2 (updated February 2021). *Cochrane*.  
39 577 2021; Available from [www.training.cochrane.org/handbook](http://www.training.cochrane.org/handbook).
- 40  
41 578 29. Salanti G, Del Giovane C, Chaimani A, et al. Evaluating the quality of evidence from a network  
42 579 meta-analysis. *PloS one*. 2014;9(7):e99682.
- 43  
44 580 30. Lu G, Ades AE. Combination of direct and indirect evidence in mixed treatment comparisons.  
45 581 *Statistics in medicine*. 2004;23(20):3105-24.
- 46  
47 582 31. Lu G, Ades AE, Sutton AJ, et al. Meta-analysis of mixed treatment comparisons at multiple follow-  
48 583 up times. *Statistics in medicine*. 2007;26(20):3681-99.
- 49  
50 584 32. Smith TC, Spiegelhalter DJ, Thomas A. Bayesian approaches to random-effects meta-analysis: a  
51 585 comparative study. *Statistics in medicine*. 1995;14(24):2685-99.
- 52  
53 586 33. Caldwell DM, Ades AE, Higgins JP. Simultaneous comparison of multiple treatments: combining  
54 587 direct and indirect evidence. *BMJ (Clinical research ed)*. 2005;331(7521):897-900.
- 55  
56 588 34. Cooper NJ, Sutton AJ, Morris D, et al. Addressing between-study heterogeneity and inconsistency  
57 589 in mixed treatment comparisons: Application to stroke prevention treatments in individuals  
58 590 with non-rheumatic atrial fibrillation. *Statistics in medicine*. 2009;28(14):1861-81.
- 59  
60 591 35. Dias S, Welton NJ, Caldwell DM, et al. Checking consistency in mixed treatment comparison  
592 592 meta-analysis. *Statistics in medicine*. 2010;29(7-8):932-44.
- 593  
594 593 36. Salanti G, Higgins JP, Ades AE, et al. Evaluation of networks of randomized trials. *Statistical*  
594 594 *methods in medical research*. 2008;17(3):279-301.

Knee osteoarthritis (KOA); Knee adduction moment (KAM); Knee adduction angular impulse (KAAI)

- 1  
2  
3 595 37. Welton NJ, Caldwell DM, Adamopoulos E, et al. Mixed treatment comparison meta-analysis of  
4 596 complex interventions: psychological interventions in coronary heart disease. *American*  
5 597 *journal of epidemiology*. 2009;169(9):1158-65.
- 6 598 38. Turner RM, Jackson D, Wei Y, et al. Predictive distributions for between-study heterogeneity and  
7 599 simple methods for their application in Bayesian meta-analysis. *Statistics in medicine*.  
8 600 2015;34(6):984-98.
- 9 601 39. Dias S, Welton NJ, Sutton AJ, et al. Evidence synthesis for decision making 4: inconsistency in  
10 602 networks of evidence based on randomized controlled trials. *Medical decision making : an*  
11 603 *international journal of the Society for Medical Decision Making*. 2013;33(5):641-56.
- 12 604 40. Dias S, Welton NJ, Sutton AJ, et al. NICE Decision Support Unit Technical Support Documents.  
13 605 NICE DSU Technical Support Document 2: A Generalised Linear Modelling Framework for  
14 606 Pairwise and Network Meta-Analysis of Randomised Controlled Trials. London: National  
15 607 Institute for Health and Care Excellence (NICE)
- 16 608 Copyright © 2014 National Institute for Health and Clinical Excellence, unless otherwise stated. All  
17 609 rights reserved. 2014.
- 18 610 41. Arazpour M, Bani MA, Maleki M, et al. Comparison of the efficacy of laterally wedged insoles and  
19 611 bespoke unloader knee orthoses in treating medial compartment knee osteoarthritis.  
20 612 *Prosthetics and orthotics international*. 2013;37(1):50-7.
- 21 613 42. Barrios JA, Butler RJ, Crenshaw JR, et al. Mechanical effectiveness of lateral foot wedging in  
22 614 medial knee osteoarthritis after 1 year of wear. *Journal of orthopaedic research : official*  
23 615 *publication of the Orthopaedic Research Society*. 2013;31(5):659-64.
- 24 616 43. Bennell KL, Hunt MA, Wrigley TV, et al. Hip strengthening reduces symptoms but not knee load  
25 617 in people with medial knee osteoarthritis and varus malalignment: a randomised controlled  
26 618 trial. *Osteoarthritis and cartilage*. 2010;18(5):621-8.
- 27 619 44. Bennell KL, Kyriakides M, Metcalf B, et al. Neuromuscular versus quadriceps strengthening  
28 620 exercise in patients with medial knee osteoarthritis and varus malalignment: a randomized  
29 621 controlled trial. *Arthritis & rheumatology (Hoboken, NJ)*. 2014;66(4):950-9.
- 30 622 45. Erhart-Hledik JC, Elspas B, Giori NJ, et al. Effect of variable-stiffness walking shoes on knee  
31 623 adduction moment, pain, and function in subjects with medial compartment knee osteoarthritis  
32 624 after 1 year. *Journal of orthopaedic research : official publication of the Orthopaedic*  
33 625 *Research Society*. 2012;30(4):514-21.
- 34 626 46. Foroughi N, Smith RM, Lange AK, et al. Lower limb muscle strengthening does not change frontal  
35 627 plane moments in women with knee osteoarthritis: A randomized controlled trial. *Clin*  
36 628 *Biomech (Bristol, Avon)*. 2011;26(2):167-74.
- 37 629 47. Holsgaard-Larsen A, Clausen B, Søndergaard J, et al. The effect of instruction in analgesic use  
38 630 compared with neuromuscular exercise on knee-joint load in patients with knee osteoarthritis:  
39 631 a randomized, single-blind, controlled trial. *Osteoarthritis and cartilage*. 2017;25(4):470-80.
- 40 632 48. Hunt MA, Charlton JM, Krowchuk NM, et al. Clinical and biomechanical changes following a 4-  
41 633 month toe-out gait modification program for people with medial knee osteoarthritis: a  
42 634 randomized controlled trial. *Osteoarthritis and cartilage*. 2018;26(7):903-11.
- 43 635 49. Hunt MA, Pollock CL, Kraus VB, et al. Relationships amongst osteoarthritis biomarkers, dynamic  
44 636 knee joint load, and exercise: results from a randomized controlled pilot study. *BMC*  
45 637 *Musculoskelet Disord*. 2013;14:115.
- 46 638 50. Jones RK, Nester CJ, Richards JD, et al. A comparison of the biomechanical effects of valgus knee

Knee osteoarthritis (KOA); Knee adduction moment (KAM); Knee adduction angular impulse (KAAI)

- braces and lateral wedged insoles in patients with knee osteoarthritis. *Gait & posture*. 2013;37(3):368-72.
51. Khosravi M, Arazpour M, Sharafat Vaziri A. An evaluation of the use of a lateral wedged insole and a valgus knee brace in combination in subjects with medial compartment knee osteoarthritis (OA). *Assistive technology : the official journal of RESNA*. 2021;33(2):87-94.
52. Lim BW, Hinman RS, Wrigley TV, et al. Does knee malalignment mediate the effects of quadriceps strengthening on knee adduction moment, pain, and function in medial knee osteoarthritis? A randomized controlled trial. *Arthritis and rheumatism*. 2008;59(7):943-51.
53. Hinman RS, Wrigley TV, Metcalf BR, et al. Unloading Shoes for Self-management of Knee Osteoarthritis: A Randomized Trial. *Annals of internal medicine*. 2016;165(6):381-9.
54. Robert-Lachaine X, Dessery Y, Belzile É L, et al. Three-month efficacy of three knee braces in the treatment of medial knee osteoarthritis in a randomized crossover trial. *Journal of orthopaedic research : official publication of the Orthopaedic Research Society*. 2020;38(10):2262-71.
55. Song Q, Shen P, Mao M, et al. Proprioceptive neuromuscular facilitation improves pain and descending mechanics among elderly with knee osteoarthritis. *Scandinavian journal of medicine & science in sports*. 2020;30(9):1655-63.
56. Trombini-Souza F, Matias AB, Yokota M, et al. Long-term use of minimal footwear on pain, self-reported function, analgesic intake, and joint loading in elderly women with knee osteoarthritis: A randomized controlled trial. *Clin Biomech (Bristol, Avon)*. 2015;30(10):1194-201.
57. Wang X, Xie X, Hou M, et al. [Kinetic mechanism of electroacupuncture for stair climbing in knee osteoarthritis patients]. *Zhongguo zhen jiu = Chinese acupuncture & moxibustion*. 2017;37(10):1027-34.
58. Cooper NJ, Kendrick D, Achana F, et al. Network meta-analysis to evaluate the effectiveness of interventions to increase the uptake of smoke alarms. *Epidemiologic reviews*. 2012;34:32-45.
59. Lambert PC, Sutton AJ, Abrams KR, et al. A comparison of summary patient-level covariates in meta-regression with individual patient data meta-analysis. *Journal of clinical epidemiology*. 2002;55(1):86-94.
60. Schmid CH, Stark PC, Berlin JA, et al. Meta-regression detected associations between heterogeneous treatment effects and study-level, but not patient-level, factors. *Journal of clinical epidemiology*. 2004;57(7):683-97.
61. Thompson SG, Higgins JP. How should meta-regression analyses be undertaken and interpreted? *Statistics in medicine*. 2002;21(11):1559-73.
62. Bennell KL, Hinman RS. A review of the clinical evidence for exercise in osteoarthritis of the hip and knee. *J Sci Med Sport*. 2011;14(1):4-9.
63. Fransen M, McConnell S, Harmer AR, et al. Exercise for osteoarthritis of the knee. *The Cochrane database of systematic reviews*. 2015;1:Cd004376.
64. Fransen M, McConnell S, Hernandez-Molina G, et al. Exercise for osteoarthritis of the hip. *The Cochrane database of systematic reviews*. 2014(4):Cd007912.
65. Fu HC, Lie CW, Ng TP, et al. Prospective study on the effects of orthotic treatment for medial knee osteoarthritis in Chinese patients: clinical outcome and gait analysis. *Hong Kong medical journal = Xianggang yi xue za zhi*. 2015;21(2):98-106.
66. Goh SL, Persson MSM, Stocks J, et al. Efficacy and potential determinants of exercise therapy in knee and hip osteoarthritis: A systematic review and meta-analysis. *Annals of physical and*

Knee osteoarthritis (KOA); Knee adduction moment (KAM); Knee adduction angular impulse (KAAl)

- 1  
2  
3 683 *rehabilitation medicine*. 2019;62(5):356-65.  
4 684 67. Maly MR. Abnormal and cumulative loading in knee osteoarthritis. *Current opinion in*  
5 685 *rheumatology*. 2008;20(5):547-52.  
6 686 68. Erhart-Hledik JC, Mahtani GB, Asay JL, et al. Changes in knee adduction moment wearing a  
7 687 variable-stiffness shoe correlate with changes in pain and mechanically stimulated cartilage  
8 688 oligomeric matrix levels. *Journal of orthopaedic research : official publication of the*  
9 689 *Orthopaedic Research Society*. 2021;39(3):619-27.  
10 690 69. Maleki M, Arazpour M, Joghtaei M, et al. The effect of knee orthoses on gait parameters in medial  
11 691 knee compartment osteoarthritis: A literature review. *Prosthetics and orthotics international*.  
12 692 2016;40(2):193-201.  
13  
14  
15  
16  
17  
18  
19  
20  
21  
22  
23  
24  
25  
26  
27  
28  
29  
30  
31  
32  
33  
34  
35  
36  
37  
38  
39  
40  
41  
42  
43  
44  
45  
46  
47  
48  
49  
50  
51  
52  
53  
54  
55  
56  
57  
58  
59  
60

For peer review only

## Tables

**Table 1. Characteristics of included studies (1) \***

| Authors                     | Country   | Clinical criteria†                                                                      | Radiographic features                                | Intervention                                                                                                                 | Comparisons                   | Follow up |
|-----------------------------|-----------|-----------------------------------------------------------------------------------------|------------------------------------------------------|------------------------------------------------------------------------------------------------------------------------------|-------------------------------|-----------|
| Barrios 2013 <sup>42</sup>  | US        | Medial compartment knee OA; Pain VAS ( $\geq 3$ of 10 upon walking)                     | K/L grade $\geq 2$ , medial tibiofemoral compartment | bespoke full-length LWI                                                                                                      | Placebo                       | 12 months |
| Hinman 2016 <sup>53</sup>   | Australia | Medial compartment knee OA; Pain NRS ( $> 4$ of 11 upon walking) over the previous week | K/L grade $\geq 2$ , medial tibiofemoral compartment | 5° full-length LWI                                                                                                           | Placebo                       | 6 months  |
| Arazpour 2012 <sup>41</sup> | Iran      | Medial compartment knee OA                                                              | K/L grade 1 and 2, medial tibiofemoral compartment   | 6° full-length LWI                                                                                                           | bespoke unloader knee braces  | 6 weeks   |
| Jones 2013 <sup>50</sup>    | UK        | Medial compartment knee OA                                                              | K/L grade 2 and 3, medial JSN                        | LWI: The heel was inclined at 5° with the inclination reduced to 0° at the 5th metatarsal head with a contoured arch profile | 6° valgus knee brace          | 2 weeks   |
| Khosravi 2019 <sup>51</sup> | Iran      | Medial compartment knee OA                                                              | K/L grade 2 and 3                                    | Full length custom-made LWI; LWI+ knee brace                                                                                 | three-point valgus knee brace | 6 weeks   |

\* OA=osteoarthritis; LWI=lateral wedged insoles; VAS=visual analog scale; NRS=numerical rating scale; K/L=Kellgren/Lawrence; NR=not reported; JSN=joint space narrowing;

Knee osteoarthritis (KOA); Knee adduction moment (KAM); Knee adduction angular impulse (KAAI)



**Table 1. Characteristics of included studies (2) \***

| Authors                          | Country   | Clinical criteria†                                                                                         | Radiographic features                                | Intervention                                                   | Comparisons                     | Follow up |
|----------------------------------|-----------|------------------------------------------------------------------------------------------------------------|------------------------------------------------------|----------------------------------------------------------------|---------------------------------|-----------|
| Hunt 2018 <sup>48</sup>          | US        | Medial compartment knee OA;<br>Pain ( $\geq 3$ of 10) longer than 6 months                                 | K/L grade $\geq 2$ , medial tibiofemoral compartment | Toe-out gait modification                                      | Walking without any guidance    | 4 months  |
| Lim 2008 <sup>52</sup>           | Australia | Medial compartment knee OA;<br>Medial knee pain                                                            | K/L grade $\geq 2$ , medial JSN                      | Quadriceps strengthening                                       | No intervention                 | 12 weeks  |
| Erhart-Hledik 2012 <sup>45</sup> | US        | Medial compartment knee OA;<br>Medial knee pain                                                            | K/L grade $\geq 1$                                   | Variable-stiffness shoe with stiffer soles on the lateral side | Constant-stiffness control shoe | 12 months |
| Bennell 2010 <sup>43</sup>       | Australia | Medial compartment knee OA;<br>Varus malalignment; Pain ( $> 3$ of 11 upon walking)                        | K/L grade $\geq 2$ , medial JSN                      | Hip strengthening                                              | No intervention                 | 13 weeks  |
| Cheung 2018 <sup>23</sup>        | China     | Medial compartment knee OA;<br>Knee pain occurred at least one day a week during each of the 8 weeks prior | K/L grade 1 and 2                                    | Gait retraining for KAM reduction                              | Walking without any guidance    | 6 weeks   |

\* OA=osteoarthritis; LWI=lateral wedged insoles; VAS=visual analog scale; NRS=numerical rating scale; K/L=Kellgren/Lawrence; NR=not reported; JSN=joint space narrowing;

Knee osteoarthritis (KOA); Knee adduction moment (KAM); Knee adduction angular impulse (KAAI)

**Table 1. Characteristics of included studies (3) \***

| Authors                                | Country   | Clinical criteria†                                                                      | Radiographic features                                   | Intervention           | Comparisons                 | Follow up |
|----------------------------------------|-----------|-----------------------------------------------------------------------------------------|---------------------------------------------------------|------------------------|-----------------------------|-----------|
| Foroughi 2011 <sup>46</sup>            | Australia | Primary knee OA                                                                         | K/L grade $\geq 1$                                      | Lower limb exercise    | Sham-exercise               | 6 months  |
| Bennell 2014 <sup>44</sup>             | Australia | Medial compartment knee OA;<br>Pain VAS ( $\geq 25$ of 100) over the<br>past week       | K/L grade $\geq 2$ , medial<br>tibiofemoral compartment | Neuromuscular exercise | Quadriceps<br>strengthening | 12 weeks  |
| Hunt 2013 <sup>49</sup>                | Canada    | Medial compartment knee OA;<br>Knee pain $> 3/10$ on most days of<br>the previous month | K/L grade $\geq 2$ , medial<br>tibiofemoral compartment | Lower limb exercise    | No intervention             | 11 weeks  |
| Holsgaard-Larsen<br>2017 <sup>47</sup> | Denmark   | Primary knee OA<br>Pain KOOS( $< 80$ of 100, at<br>least mild pain)                     | K/L grade $\leq 3$                                      | Neuromuscular exercise | Analgesic advice            | 8 weeks   |

\* OA=osteoarthritis; LWI=lateral wedged insoles; VAS=visual analog scale; NRS=numerical rating scale; K/L=Kellgren/Lawrence; NR=not reported; JSN=joint space narrowing;

Knee osteoarthritis (KOA); Knee adduction moment (KAM); Knee adduction angular impulse (KAAI)



**Table 1. Characteristics of included studies (4) \***

| Authors                            | Country | Clinical criteria†                                                                      | Radiographic features | Intervention                                                                                                                                                              | Comparisons                                                             | Follow up |
|------------------------------------|---------|-----------------------------------------------------------------------------------------|-----------------------|---------------------------------------------------------------------------------------------------------------------------------------------------------------------------|-------------------------------------------------------------------------|-----------|
| Song 2020 <sup>55</sup>            | China   | Medial compartment knee OA in one or both legs.                                         | K/L grade $\leq 3$    | PNF (one-hour sessions three times a week)                                                                                                                                | Watch television or read magazines at the same time                     | 12 weeks  |
| Wang 2017 <sup>57</sup>            | China   | Medial compartment knee OA                                                              | K/L grade 2 and 3     | Acupuncture with 2 Hz continuous wave in Neixiyan (EX-LE 4), Dubi (ST 35), Yanglingquan (GB 34), Yinlingquan (SP 9), Xuehai (SP 10), Liangqiu (ST 34) and Zusanli (ST 36) | 2 cm next to the same acupoints with shallow acupuncture and no current | Immediate |
| Robert-Lachaine 2020 <sup>54</sup> | Canada  | Medial compartment knee OA; Pain > 31/100 on WOMAC; Varus knee alignment $\geq 2^\circ$ | K/L grade 2 and 3     | V3P-brace; VER-brace; ACL-brace (wear the brace as often as possible)                                                                                                     | /                                                                       | 3 months  |
| Trombini-Souza 2015 <sup>56</sup>  | Brazil  | Medial compartment knee OA; Knee pain between 3 and 8 on VAS                            | K/L grade 2 and 3     | Minimalist footwear (Moleca®)                                                                                                                                             | Standard, neutral tennis shoe                                           | 6 months  |

\* OA=osteoarthritis; LWI=lateral wedged insoles; VAS=visual analog scale; NRS=numerical rating scale; K/L=Kellgren/Lawrence; NR=not reported; JSN=joint space narrowing; PNF=Proprioceptive neuromuscular facilitation; V3P-brace= three-point bending system valgus knee brace; VER-brace= unloader brace with valgus and external rotation functions; ACL-brace= functional medial-lateral stabilization brace used after ligament injuries; The Moleca® shoe is a low-cost women's double canvas, flexible, flat, walking shoe without heels, with a 5-mm anti-slip rubber sole and a 3-mm flat insole of ethylene vinyl acetate that provides only protection but no correction of any kind.

Knee osteoarthritis (KOA); Knee adduction moment (KAM); Knee adduction angular impulse (KAAI)

**Table 2. Characteristics of participants in included studies (1) \***

| Authors                     | No. | Sex, M:F | Age, years | Height, meters | Body mass, kg | BMI, kg/m <sup>2</sup> | Bilateral knee<br>OA included | K/L grade, no. |    |    |    | Main<br>outcomes                                 |
|-----------------------------|-----|----------|------------|----------------|---------------|------------------------|-------------------------------|----------------|----|----|----|--------------------------------------------------|
|                             |     |          |            |                |               |                        |                               | 1              | 2  | 3  | 4  |                                                  |
| Barrios 2013 <sup>42</sup>  | 38  | NR       | 61.90±8.37 | NR             | NR            | 32.00±7.43             | NR                            | 0              | 17 | 14 | 7  | 1 <sup>st</sup> KAM;<br>KAAI                     |
| Hinman 2016 <sup>53</sup>   | 164 | 20:21    | 64.30±7.45 | 1.67 ± 0.10    | 82.95±14.76   | 29.70±3.64             | NR                            | 0              | 49 | 52 | 63 | 1 <sup>st</sup> KAM;<br>KAAI                     |
| Arazpour 2012 <sup>41</sup> | 24  | 3:4      | 59.29±2.37 | NR             | NR            | 27.01±1.71             | Yes                           | 9              | 15 | 0  | 0  | 1 <sup>st</sup> KAM                              |
| Jones 2013 <sup>50</sup>    | 28  | 4:3      | 66.30±8.20 | 1.75±0.13      | 88.7±15.10    | NR                     | No                            | 0              | 10 | 18 | 0  | 1 <sup>st</sup> and 2 <sup>nd</sup><br>KAM; KAAI |
| Khosravi 2019 <sup>51</sup> | 21  | 13:8     | 58.97±6.80 | 1.62±0.11      | 79.11±9.35    | NR                     | NR                            | 0              | 9  | 12 | 0  | 1 <sup>st</sup> KAM                              |

\* Values are the mean±SD unless indicated otherwise. BMI=body mass index; K/L=Kellgren/Lawrence; NR=not reported; JSN=joint space narrowing; KAM=knee adduction moment; KAAI=knee adduction angular impulse.

Knee osteoarthritis (KOA); Knee adduction moment (KAM); Knee adduction angular impulse (KAAI)

**Table 2. Characteristics of participants in included studies (2) \***

| Authors                             | No. | Sex, M:F | Age, years | Height, meters | Body mass, kg | BMI, kg/m <sup>2</sup> | Bilateral knee<br>OA included | K/L grade, no. |    |    |    | Main<br>outcomes                                 |
|-------------------------------------|-----|----------|------------|----------------|---------------|------------------------|-------------------------------|----------------|----|----|----|--------------------------------------------------|
|                                     |     |          |            |                |               |                        |                               | 1              | 2  | 3  | 4  |                                                  |
| Hunt 2018 <sup>48</sup>             | 79  | 24:55    | 64.99±8.60 | 1.65±0.10      | 74.59±13.15   | 27.35±3.48             | Yes                           | 0              | 37 | 31 | 11 | 1 <sup>st</sup> and 2 <sup>nd</sup><br>KAM; KAAI |
| Lim 2008 <sup>52</sup>              | 107 | 48:59    | 64.60±8.51 | 1.65±0.10      | 79.41±15.32   | 28.96±4.85             | Yes                           | 0              | 34 | 29 | 44 | 1 <sup>st</sup> KAM                              |
| Erhart-Hledik<br>2012 <sup>45</sup> | 79  | 41:38    | 61.70±9.43 | 1.69±0.08      | 79.50±15.07   | 27.51±4.87             | Yes                           | NR             | NR | NR | NR | 1 <sup>st</sup> KAM                              |
| Bennell 2010 <sup>43</sup>          | 89  | 46:43    | 64.55±8.34 | NR             | NR            | 27.94±4.41             | Yes                           | 0              | 30 | 29 | 30 | 1 <sup>st</sup> KAM;<br>KAAI                     |
| Cheung 2018 <sup>23</sup>           | 20  | 1:1      | 61.95±6.11 | 1.63±0.09      | 65.85±6.64    | 27.35±3.48             | NR                            | 5              | 15 | 0  | 0  | 1 <sup>st</sup> KAM                              |

\* Values are the mean±SD unless indicated otherwise. BMI=body mass index; K/L=Kellgren/Lawrence; NR=not reported; JSN=joint space narrowing; KAM=knee adduction moment; KAAI=knee adduction angular impulse.

Knee osteoarthritis (KOA); Knee adduction moment (KAM); Knee adduction angular impulse (KAAI)

**Table 2. Characteristics of participants in included studies (3) \***

| Authors                                | No. | Sex, M:F | Age, years | Height, meters | Body mass, kg | BMI, kg/m <sup>2</sup> | Bilateral knee<br>OA included | K/L grade, no. |    |    |    | Main<br>outcomes                           |
|----------------------------------------|-----|----------|------------|----------------|---------------|------------------------|-------------------------------|----------------|----|----|----|--------------------------------------------|
|                                        |     |          |            |                |               |                        |                               | 1              | 2  | 3  | 4  |                                            |
| Foroughi 2011 <sup>46</sup>            | 54  | 0:54     | 65.48±7.44 | NR             | 82.87±18.43   | 32.07±7.08             | Yes                           | 20             | 7  | 20 | 1  | 1 <sup>st</sup> and 2 <sup>nd</sup><br>KAM |
| Bennell 2014 <sup>44</sup>             | 100 | 48:52    | 62.45±7.32 | 1.67±0.10      | 82.70±14.29   | 29.65±4.08             | Yes                           | 0              | 22 | 43 | 35 | 1 <sup>st</sup> KAM;<br>KAAI               |
| Hunt 2013 <sup>49</sup>                | 17  | 8:9      | 66.10±11.3 | NR             | NR            | 27.00±4.50             | Yes                           | 0              | 10 | 5  | 2  | 1 <sup>st</sup> KAM;<br>KAAI               |
| Holsgaard-Larsen<br>2017 <sup>47</sup> | 93  | 39:54    | 58.10±7.96 | NR             | 79.64±12.49   | 26.90±3.09             | NR                            | 45             | 31 | 17 | 0  | 1 <sup>st</sup> KAM;<br>KAAI               |

\* Values are the mean±SD unless indicated otherwise. BMI=body mass index; K/L=Kellgren/Lawrence; NR=not reported; JSN=joint space narrowing; KAM=knee adduction moment; KAAI=knee adduction angular impulse.

Knee osteoarthritis (KOA); Knee adduction moment (KAM); Knee adduction angular impulse (KAAI)

**Table 2. Characteristics of participants in included studies (4) \***

| Authors                               | No. | Sex, M:F | Age, years | Height, meters | Body mass, kg | BMI, kg/m <sup>2</sup> | Bilateral knee<br>OA included | K/L grade, no. |    |    |   | Main<br>outcomes                                 |
|---------------------------------------|-----|----------|------------|----------------|---------------|------------------------|-------------------------------|----------------|----|----|---|--------------------------------------------------|
|                                       |     |          |            |                |               |                        |                               | 1              | 2  | 3  | 4 |                                                  |
| Song 2020 <sup>55</sup>               | 36  | 1:1      | 68.01±3.91 | 1.62±0.07      | 68.16±6.77    | NR                     | Yes                           | 9              | 20 | 7  | 0 | 1 <sup>st</sup> KAM                              |
| Wang 2017 <sup>57</sup>               | 36  | 1:5      | 63.50±7.95 | NR             | NR            | 23.75±2.66             | Yes                           | 0              | 19 | 17 | 0 | 1 <sup>st</sup> and 2 <sup>nd</sup><br>KAM       |
| Robert-Lachaine<br>2020 <sup>54</sup> | 24  | 7:5      | 57.20±8.60 | 1.68±0.09      | 89.30±18.70   | 31.40±5.00             | NR                            | 0              | 15 | 8  | 0 | 1 <sup>st</sup> and 2 <sup>nd</sup><br>KAM; KAAI |
| Trombini-Souza<br>2015 <sup>56</sup>  | 56  | NR       | 66.00±5.00 | 1.60±0.10      | 73.40±13.10   | NR                     | NR                            | 0              | NR | NR | 0 | 1 <sup>st</sup> KAM;<br>KAAI                     |

\* Values are the mean±SD unless indicated otherwise. BMI=body mass index; K/L=Kellgren/Lawrence; NR=not reported; JSN=joint space narrowing; KAM=knee adduction moment;

KAAI=knee adduction angular impulse.

Knee osteoarthritis (KOA); Knee adduction moment (KAM); Knee adduction angular impulse (KAAI)

|                                      |                                      |                                      |                                   |                                   |                                      |                       |                       |                                   |                                      |
|--------------------------------------|--------------------------------------|--------------------------------------|-----------------------------------|-----------------------------------|--------------------------------------|-----------------------|-----------------------|-----------------------------------|--------------------------------------|
| <b>J</b>                             | 0.41<br>(-0.66,1.49)                 | 0.16<br>(-0.46,0.79)                 | -                                 | 0.20<br>(-0.23,0.64)              | <b>0.81</b><br><b>(0.17,1.45)</b>    | -                     | 0.30<br>(-0.61,1.21)  | <b>0.54</b><br><b>(0.02,1.07)</b> | 0.32<br>(-0.10,0.75)                 |
| 0.28<br>(-0.34,0.89)                 | <b>I</b>                             | -0.25<br>(-1.33,0.84)                | -                                 | -0.21<br>(-1.37,0.95)             | 0.40<br>(-0.70,1.49)                 | -                     | -0.12<br>(-1.39,1.16) | 0.13<br>(-0.90,1.16)              | -0.09<br>(-1.08,0.90)                |
| 0.07<br>(-0.50,0.64)                 | -0.21<br>(-0.89,0.47)                | <b>H</b>                             | -                                 | 0.04<br>(-0.72,0.80)              | 0.64<br>(-0.01,1.30)                 | -                     | 0.13<br>(-0.79,1.05)  | 0.38<br>(-0.16,0.92)              | 0.16<br>(-0.29,0.61)                 |
| <b>-0.69</b><br><b>(-1.36,-0.02)</b> | <b>-0.97</b><br><b>(-1.73,-0.21)</b> | <b>-0.76</b><br><b>(-1.49,-0.03)</b> | <b>G</b>                          | -                                 | -                                    | -                     | -                     | -                                 | -                                    |
| 0.24<br>(-0.11,0.59)                 | -0.04<br>(-0.64,0.57)                | 0.17<br>(-0.39,0.74)                 | <b>0.93</b><br><b>(0.27,1.60)</b> | <b>F</b>                          | 0.61<br>(-0.17,1.38)                 | -                     | 0.09<br>(-0.91,1.10)  | 0.34<br>(-0.34,1.02)              | 0.12<br>(-0.49,0.73)                 |
| <b>0.89</b><br><b>(0.35,1.44)</b>    | 0.62<br>(-0.04,1.28)                 | <b>0.83</b><br><b>(0.20,1.45)</b>    | <b>1.59</b><br><b>(0.87,2.30)</b> | <b>0.65</b><br><b>(0.11,1.19)</b> | <b>E</b>                             | -                     | -0.51<br>(-1.45,0.42) | -0.27<br>(-0.83,0.30)             | <b>-0.48</b><br><b>(-0.96,-0.01)</b> |
| <b>1.28</b><br><b>(0.21,2.36)</b>    | 1.01<br>(-0.13,2.14)                 | <b>1.22</b><br><b>(0.10,2.33)</b>    | <b>1.98</b><br><b>(0.81,3.15)</b> | 1.04<br>(-0.03,2.11)              | 0.39<br>(-0.71,1.49)                 | <b>D</b>              | -                     | -                                 | -                                    |
| <b>0.78</b><br><b>(0.11,1.45)</b>    | 0.50<br>(-0.26,1.27)                 | 0.71<br>(-0.02,1.44)                 | <b>1.47</b><br><b>(0.66,2.29)</b> | 0.54<br>(-0.12,1.20)              | -0.11<br>(-0.83,0.60)                | -0.50<br>(-1.46,0.46) | <b>C</b>              | 0.25<br>(-0.50,0.99)              | 0.03<br>(-0.77,0.83)                 |
| <b>0.56</b><br><b>(0.10,1.02)</b>    | 0.29<br>(-0.30,0.87)                 | 0.49<br>(-0.05,1.04)                 | <b>1.26</b><br><b>(0.61,1.90)</b> | 0.32<br>(-0.13,0.77)              | -0.33<br>(-0.85,0.19)                | -0.72<br>(-1.70,0.25) | -0.22<br>(-0.71,0.27) | <b>B</b>                          | -0.22<br>(-0.52,0.08)                |
| <b>0.37</b><br><b>(0.02,0.71)</b>    | 0.09<br>(-0.42,0.60)                 | 0.30<br>(-0.15,0.75)                 | <b>1.06</b><br><b>(0.49,1.63)</b> | 0.13<br>(-0.21,0.46)              | <b>-0.53</b><br><b>(-0.95,-0.10)</b> | -0.92<br>(-1.94,0.10) | -0.41<br>(-0.99,0.16) | -0.19<br>(-0.49,0.10)             | <b>A</b>                             |

**Table 3. Detailed results of network meta-analysis for the First peak KAM (grey) and KAAI (white). Data are SMDs (from the top left to the bottom right, higher comparator versus lower comparator) and their related 95%CI. Bold texts in the table mean SMDs are statistically significant.**

**A= Control condition; B= Lateral Wedge Insole; C= Knee Brace; D= Lateral Wedge Insole+ Knee Brace; E= Gait retraining; F= Quadriceps strengthening; G= Variable-stiffness shoe; H= Hip strengthening; I= Lower limb exercise; J= Neuromuscular exercise.**

## Box

Knee osteoarthritis (KOA); Knee adduction moment (KAM); Knee adduction angular impulse (KAAI)

**Box 1. Inclusion criteria**

## Design

- Randomized controlled trial

## Participants

- People with radiologically confirmed knee osteoarthritis

## Intervention

- Manual therapy
- Aerobic exercise
- Pulsed electrical stimulation (PES)
- Acupuncture
- Knee braces
- Ice/cooling treatment
- Pulsed electromagnetic fields (PEMF)
- Balneotherapy
- Interferential therapy
- Transcutaneous electric Nerve stimulation (TENS)
- Heat treatment
- Foot orthoses
- Laser/light therapy
- Muscle-strengthening exercise
- Static magnets
- Tai Chi
- Athletic tape
- Neuromuscular electrical stimulation (NMES)

## Comparator

- Control condition (standard/conventional care, placebo intervention, no intervention, sham-exercise, analgesic advice and education)

## Outcome measures

- KAM and KAAI.

## Comparisons

- All interventions compared to the comparator and to each other

**Figure Legends**

**Figure 1. Flow chart of the study selection**

**Figure 2. Rankings for effects on First peak KAM. The graph displays the distribution of probabilities for each treatment. The X-axis represents the possible rank of each treatment (from the best to worst according to the outcomes), Y-axis represents the cumulative probability for each treatment to be the best option, among the best two options, among the best three options, and so on. A= Control condition; B= Lateral Wedge Insole; C= Knee Brace; D= Lateral Wedge Insole+ Knee Brace; E= Gait retraining; F= Quadriceps strengthening; G= Variable-stiffness shoe; H= Hip strengthening; I= Lower limb exercise; J= Neuromuscular exercise.**

**Figure 3. Rankings for effects on KAAI. The graph displays the distribution of probabilities for each treatment. The X-axis represents the possible rank of each treatment (from the best to worst according to the outcomes), Y-axis represents the cumulative probability for each treatment to be the best option, among the best two options, among the best three options, and so on. A= Control condition; B= Lateral Wedge Insole; C= Knee Brace; D= Lateral Wedge Insole+ Knee Brace; E= Gait retraining; F= Quadriceps strengthening; G= Variable-stiffness shoe; H= Hip strengthening; I= Lower limb exercise; J= Neuromuscular exercise.**

1  
2  
3  
4  
5  
6  
7  
8  
9  
10  
11  
12  
13  
14  
15  
16  
17  
18  
19  
20  
21  
22  
23  
24  
25  
26  
27  
28  
29  
30  
31  
32  
33  
34  
35  
36  
37  
38  
39  
40  
41  
42  
43  
44  
45  
46

best to worst according to the outcomes), Y-axis represents the cumulative probability for each treatment to be the best option, among the best two options, among the best three options, and so on. A= Control condition; B= Lateral Wedge Insole; C= Knee Brace; E= Gait retraining; F= Quadriceps strengthening; H= Hip strengthening; I= Lower limb exercise; J= Neuromuscular exercise.

**Figure 4. Risk of bias summary**

For peer review only

Knee osteoarthritis (KOA); Knee adduction moment (KAM); Knee adduction angular impulse (KAAI)



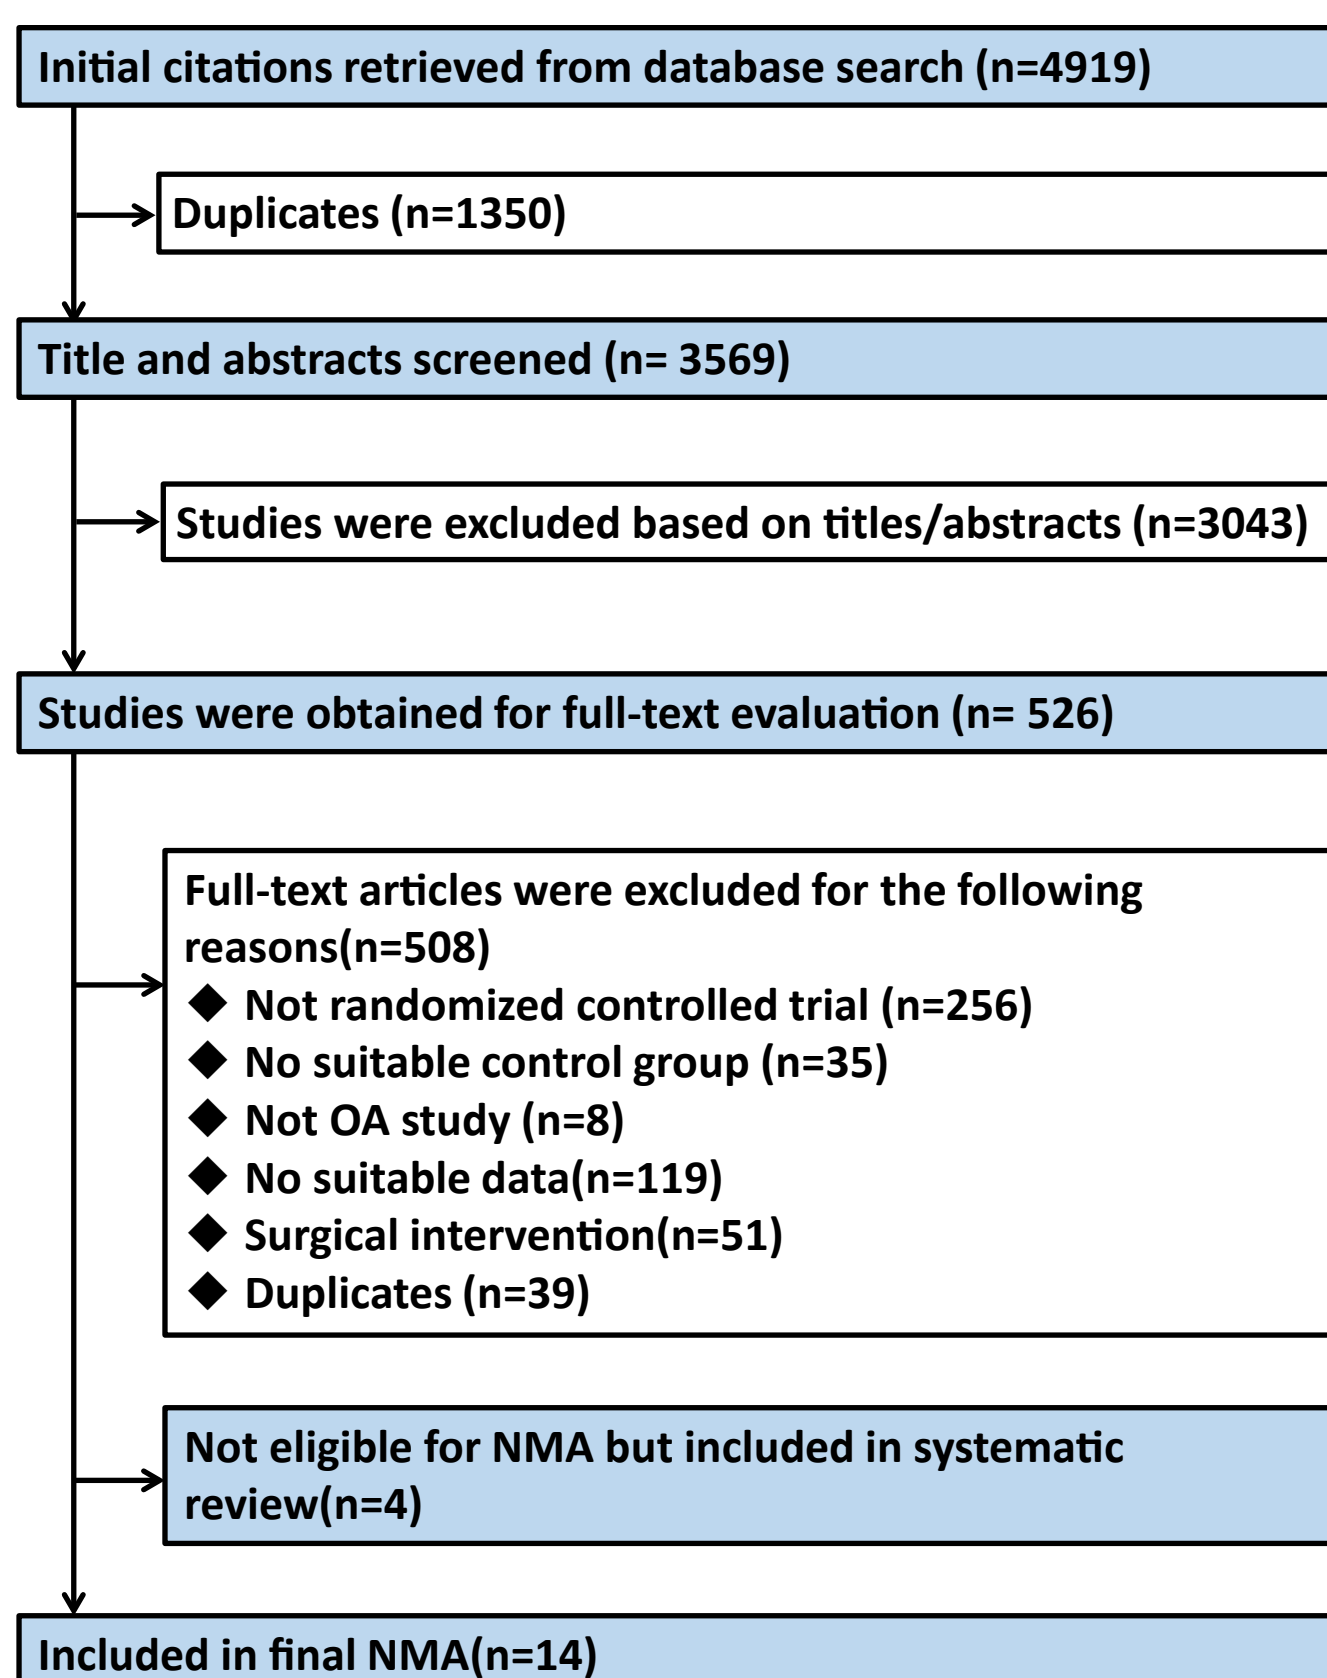

For peer review only

1  
2  
3  
4  
5  
6  
7  
8  
9  
10  
11  
12  
13  
14  
15  
16  
17  
18  
19  
20  
21  
22  
23  
24  
25  
26  
27  
28  
29  
30  
31  
32  
33  
34  
35  
36  
37  
38  
39  
40  
41  
42  
43  
44  
45  
46  
47  
48  
49  
50  
51  
52  
53  
54  
55  
56  
57  
58  
59  
60



Figure 2

1  
2  
3  
4  
5  
6  
7  
8  
9  
10  
11  
12  
13  
14  
15  
16  
17  
18  
19  
20  
21  
22  
23  
24  
25  
26  
27  
28  
29  
30  
31  
32  
33  
34  
35  
36  
37  
38  
39  
40  
41  
42  
43  
44  
45  
46  
47  
48  
49  
50  
51  
52  
53  
54  
55  
56  
57  
58  
59  
60

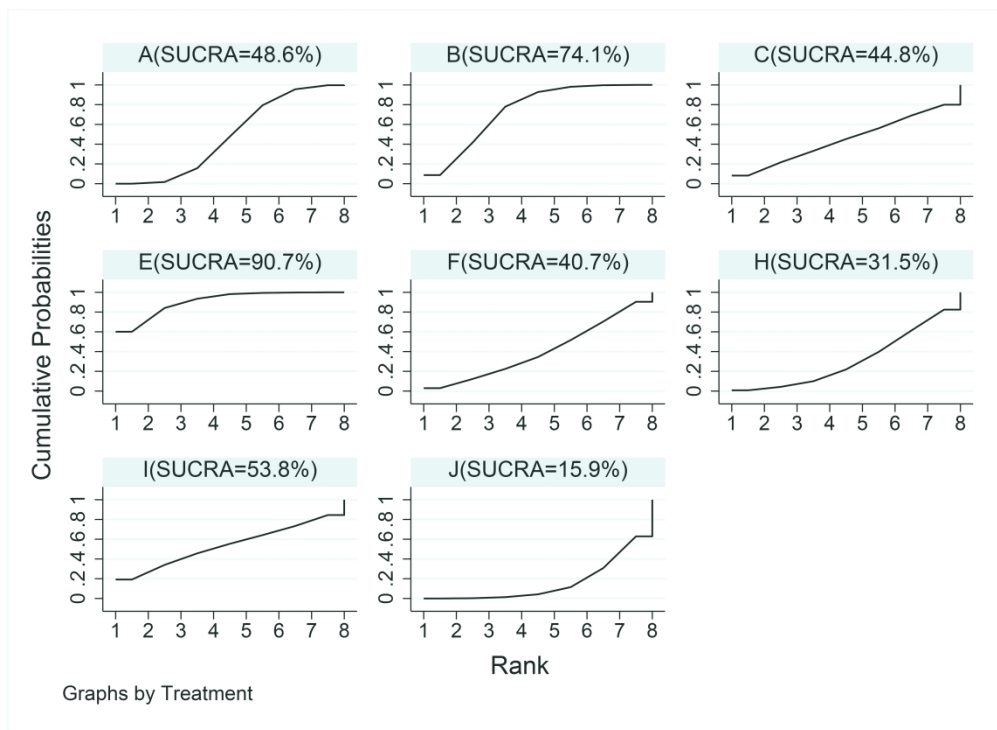

Figure 3

| Study ID              | Randomization process | Deviations from intended i | Missing outcome data | Measurement of the outcome | Selection of the reported | Overall |
|-----------------------|-----------------------|----------------------------|----------------------|----------------------------|---------------------------|---------|
| Arazpour 2012         | ?                     | ?                          | ?                    | +                          | +                         | !       |
| Barrios 2013          | ?                     | +                          | +                    | +                          | +                         | !       |
| Bennell 2010          | +                     | +                          | +                    | +                          | +                         | +       |
| Bennell 2014          | +                     | +                          | ?                    | +                          | +                         | ?       |
| Cheung 2018           | ?                     | ?                          | ?                    | +                          | ?                         | ?       |
| Erhart-Hledik 2012    | ?                     | +                          | ?                    | +                          | ?                         | ?       |
| Foroughi 2011         | ?                     | +                          | ?                    | +                          | +                         | ?       |
| Hinman 2016           | ?                     | +                          | ?                    | +                          | +                         | !       |
| Holsgaard-Larsen 2017 | +                     | +                          | +                    | +                          | +                         | +       |
| Hunt 2013             | +                     | +                          | +                    | +                          | ?                         | !       |
| Hunt 2018             | ?                     | ?                          | +                    | +                          | ?                         | ?       |
| Jones 2013            | ?                     | ?                          | ?                    | +                          | ?                         | ?       |
| Khosravi 2019         | ?                     | ?                          | ?                    | ?                          | ?                         | !       |
| Lim 2008              | +                     | ?                          | ?                    | +                          | ?                         | ?       |
| Robert-Lachaine 2020  | ?                     | ?                          | +                    | +                          | +                         | ?       |
| Song 2020             | ?                     | ?                          | ?                    | +                          | ?                         | ?       |
| Trombini-Souza 2015   | ?                     | +                          | +                    | +                          | +                         | !       |
| Wang 2017             | +                     | ?                          | +                    | +                          | ?                         | ?       |

1  
2  
3  
4  
5  
6  
7  
8  
9  
10  
11  
12  
13  
14  
15  
16  
17  
18  
19  
20  
21  
22  
23  
24  
25  
26  
27  
28  
29  
30  
31  
32  
33  
34  
35  
36  
37  
38  
39  
40  
41  
42  
43  
44  
45  
46  
47  
48  
49  
50  
51  
52  
53  
54  
55  
56  
57  
58  
59  
60

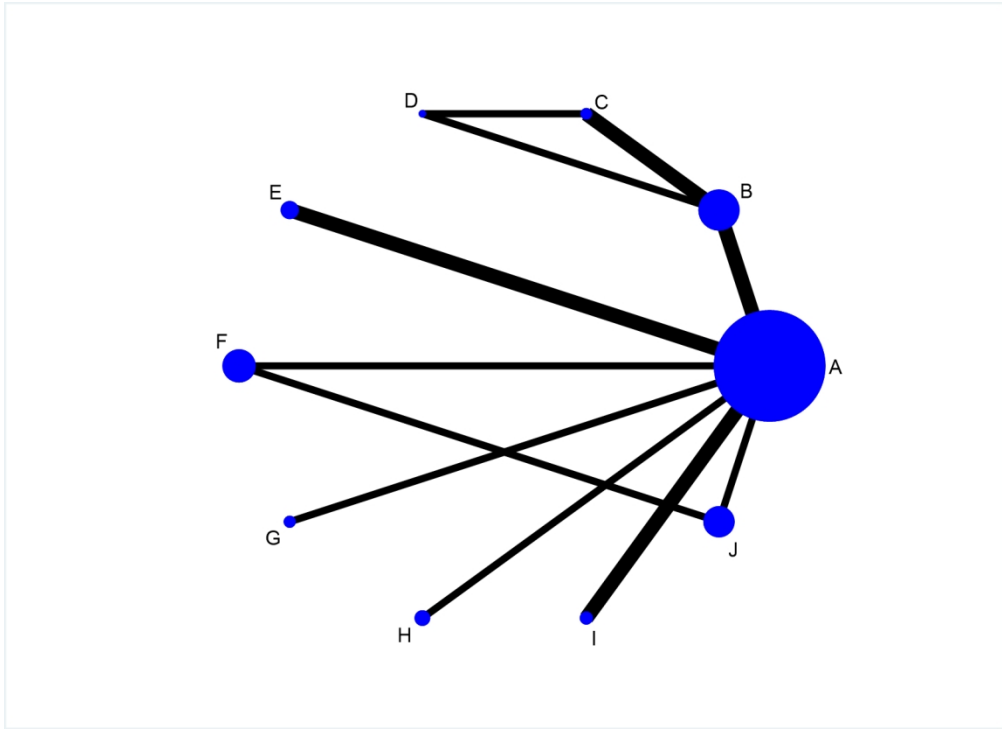

349x254mm (120 x 120 DPI)

1  
2  
3  
4  
5  
6  
7  
8  
9  
10  
11  
12  
13  
14  
15  
16  
17  
18  
19  
20  
21  
22  
23  
24  
25  
26  
27  
28  
29  
30  
31  
32  
33  
34  
35  
36  
37  
38  
39  
40  
41  
42  
43  
44  
45  
46  
47  
48  
49  
50  
51  
52  
53  
54  
55  
56  
57  
58  
59  
60

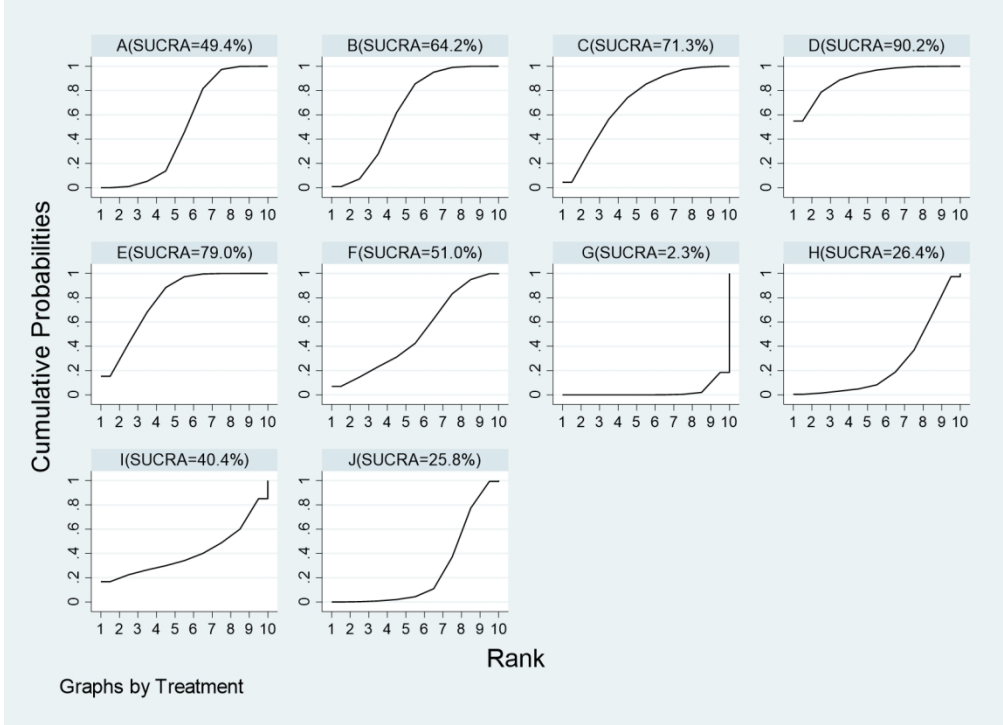

349x254mm (120 x 120 DPI)







1  
2  
3  
4  
5  
6  
7  
8  
9  
10  
11  
12  
13  
14  
15  
16  
17  
18  
19  
20  
21  
22  
23  
24  
25  
26  
27  
28  
29  
30  
31  
32  
33  
34  
35  
36  
37  
38  
39  
40  
41  
42  
43  
44  
45  
46  
47  
48  
49  
50  
51  
52  
53  
54  
55  
56  
57  
58  
59  
60

For peer review only

1  
2  
3  
4  
5  
6  
7  
8  
9  
10  
11  
12  
13  
14  
15  
16  
17  
18  
19  
20  
21  
22  
23  
24  
25  
26  
27  
28  
29  
30  
31  
32  
33  
34  
35  
36  
37  
38  
39  
40  
41  
42  
43  
44  
45  
46  
47  
48  
49  
50  
51  
52  
53  
54  
55  
56  
57  
58  
59  
60

For peer review only

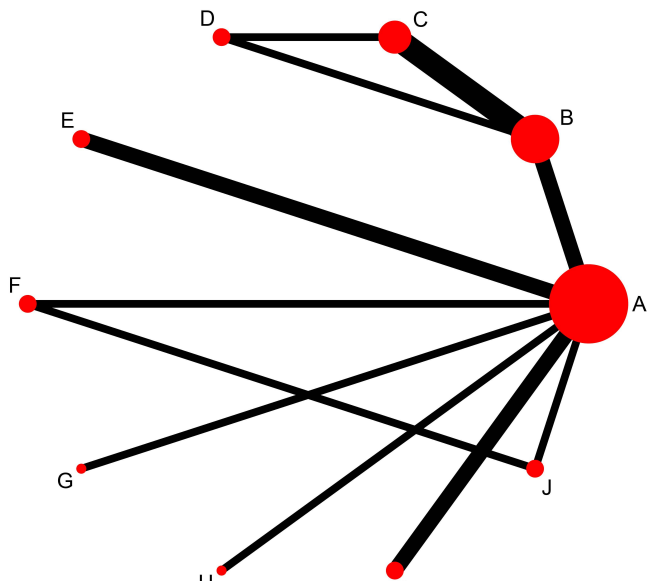

For peer review only - <http://bmjopen.bmj.com/site/about/guidelines.xhtml>

1  
2  
3  
4  
5  
6  
7  
8  
9  
10  
11  
12  
13  
14  
15  
16  
17  
18  
19  
20

1  
2  
3  
4  
5  
6  
7  
8  
9  
10  
11  
12  
13  
14  
15  
16  
17  
18  
19  
20



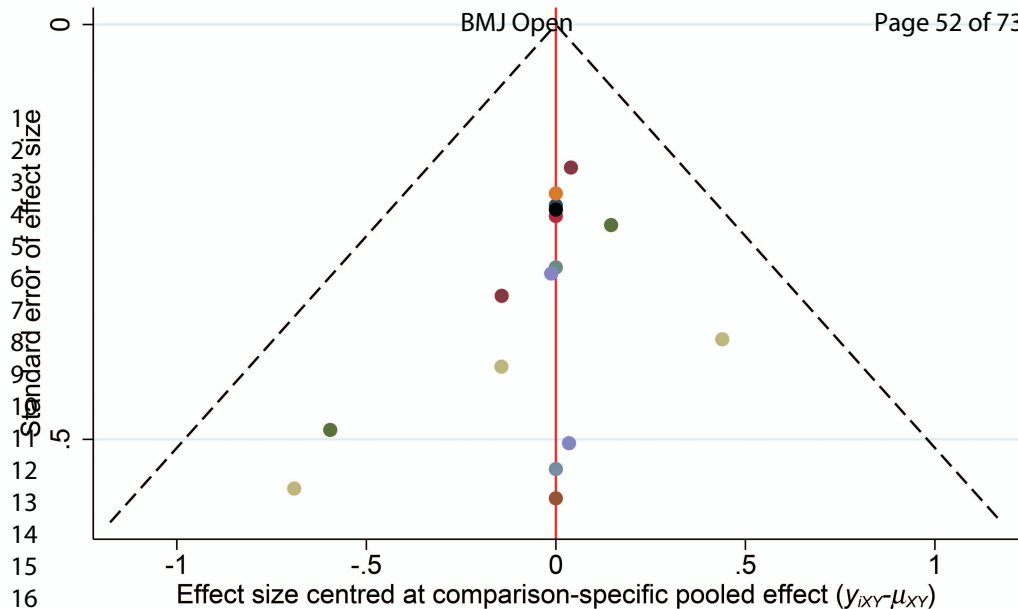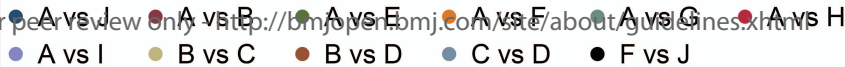



For peer review only: <https://bmjopen.bmj.com/site/about/guidelines.xhtml>

● A vs B   
 ● A vs E   
 ● A vs I   
 ● A vs J   
 ● A vs H   
 ● B vs C  
● F vs J

## Appendix

|                                                                                            |    |
|--------------------------------------------------------------------------------------------|----|
| Appendix 1 Search strategies.....                                                          | 2  |
| Appendix 2 Results of re-analysis.....                                                     | 4  |
| Appendix 3 Results of Inconsistency .....                                                  | 6  |
| Appendix 4 Conventional meta-analyses results .....                                        | 7  |
| Appendix 5 Network Diagram.....                                                            | 10 |
| Appendix 6 Table of GRADE.....                                                             | 11 |
| Appendix 7 Comparison-adjusted funnel plot for each outcome from the network meta-analysis | 16 |

## Appendix 1 Search strategies

### Search strategies for randomized controlled trials Pubmed

1. (((((((("Osteoarthritis, Knee"[Mesh]) OR Knee Osteoarthritis[Title/Abstract]) OR Knee Osteoarthritis[Title/Abstract]) OR Osteoarthritis of Knee[Title/Abstract]) OR Osteoarthritis of the Knee[Title/Abstract]))) AND (((((((((((("Physical Therapy Modalities"[Mesh]) OR (Modalities, Physical Therapy[Title/Abstract]) OR (Modality, Physical Therapy[Title/Abstract]) OR (Physical Therapy Modality[Title/Abstract]) OR (Physiotherapy (Techniques)[Title/Abstract]) OR (Physiotherapies (Techniques)[Title/Abstract]) OR (Physical Therapy Techniques[Title/Abstract]) OR (Physical Therapy Technique[Title/Abstract]) OR (Techniques, Physical Therapy[Title/Abstract]) OR (Group Physiotherapy[Title/Abstract]) OR (Group Physiotherapies[Title/Abstract]) OR (Physiotherapies, Group[Title/Abstract]) OR (Physiotherapy, Group[Title/Abstract]) OR (Neurological Physiotherapy[Title/Abstract]) OR (Physiotherapy, Neurological[Title/Abstract]) OR (Neurophysiotherapy[Title/Abstract])
2. (((((((("Osteoarthritis, Knee"[Mesh]) OR Knee Osteoarthritis[Title/Abstract]) OR Knee Osteoarthritis[Title/Abstract]) OR Osteoarthritis of Knee[Title/Abstract]) OR Osteoarthritis of the Knee[Title/Abstract]))) AND (((("Orthopedic Equipment"[Mesh]) OR(Equipment,Orthopedic[Title/Abstract]))OR(Equipments,
1. ('physiotherapy'/exp OR 'physical therapy':ab,ti OR 'physical therapy (speciality)':ab,ti OR 'physical therapy (specialty)':ab,ti OR 'physical therapy modalities ':ab,ti OR 'physical therapy service':ab,ti OR 'physical therapy speciality':ab,ti OR 'physical therapy specialty ':ab,ti OR 'physical treatment':ab,ti OR ' physio therapy ':ab,ti OR 'physical therapy techniques':ab,ti OR 'physical treatment':ab,ti OR 'physiotherapy department':ab,ti OR 'therapy, physical':ab,ti) AND ('knee osteoarthritis'/exp OR 'arthrosis, knee':ab,ti OR 'femorotibial arthrosis':ab,ti OR 'gonarthrosis':ab,ti OR 'knee arthrosis':ab,ti OR 'knee joint arthrosis':ab,ti OR 'knee joint osteoarthritis':ab,ti OR 'knee osteo-arthritis':ab,ti OR 'knee osteo-arthrosis':ab,ti OR 'knee osteoarthritis':ab,ti OR 'osteoarthritis, knee':ab,ti OR 'osteoarthrosis, knee':ab,ti)
2. ('orthosis'/exp OR 'device, orthotic':ab,ti OR 'devices, orthotic':ab,ti OR 'orthesis':ab,ti OR 'orthoepadic support device':ab,ti OR 'orthopedic support device':ab,ti OR 'orthoses':ab,ti OR 'orthotic device (physical object)':ab,ti OR 'orthotic devices':ab,ti) AND ('knee osteoarthritis'/exp OR 'arthrosis, knee':ab,ti OR 'femorotibial arthrosis':ab,ti OR 'gonarthrosis':ab,ti OR 'knee arthrosis':ab,ti OR 'knee joint arthrosis':ab,ti OR 'knee joint osteoarthritis':ab,ti OR 'knee osteo-arthritis':ab,ti OR 'knee osteo-arthrosis':ab,ti OR 'knee osteoarthritis':ab,ti OR 'osteoarthritis, knee':ab,ti OR 'osteoarthrosis, knee':ab,ti)

### Web of Science



1. AB=(physical therapy OR physiotherapy OR physio therapy OR physical treatment OR physiotherapy department OR physical therapy techniques)
2. TI=(physical therapy OR physiotherapy OR physio therapy OR physical treatment OR physiotherapy department OR physical therapy techniques)
3. AB=(orthosis OR device OR orthosis OR orthoses OR orthopedic support device OR orthotic device)
4. TI=(orthosis OR device OR orthosis OR orthoses OR orthopedic support device OR orthotic device)
5. #4 OR #3 OR #2 OR #1
6. AB=(knee osteoarthritis OR femorotibial arthrosis OR gonarthrosis OR knee arthrosis OR knee osteo-arthritis OR knee osteoarthritis OR osteoarthritis)
7. TI=(knee osteoarthritis OR femorotibial arthrosis OR gonarthrosis OR knee arthrosis OR knee osteo-arthritis OR knee osteoarthritis OR osteoarthritis)
8. #6 OR #7
9. #8 AND #5

1. (MeSH descriptor: [Physical Therapy Modalities] explode all trees OR (Neurological Physiotherapy):ti,ab,kw OR (Physiotherapy, Neurological):ti,ab,kw OR (Neurophysiotherapy):ti,ab,kw OR (Techniques, Physical Therapy):ti,ab,kw OR (Physiotherapies (Techniques)):ti,ab,kw OR (Physical Therapy Techniques):ti,ab,kw OR (Physiotherapy (Techniques)):ti,ab,kw OR (Modality, Physical Therapy):ti,ab,kw OR (Physical Therapy Modality):ti,ab,kw OR (Physical Therapy Technique):ti,ab,kw OR (Modalities, Physical Therapy):ti,ab,kw OR (Group Physiotherapies):ti,ab,kw OR (Physiotherapy, Group):ti,ab,kw OR (Group Physiotherapy):ti,ab,kw OR (Physiotherapies, Group):ti,ab,kw) AND ((Osteoarthritis of Knee):ti,ab,kw OR (Knee Osteoarthritis):ti,ab,kw OR (Osteoarthritis of the Knee):ti,ab,kw) OR MeSH descriptor: [Osteoarthritis, Knee] explode all trees)
2. (MeSH descriptor: [Orthopedic Equipment] explode all trees OR (Orthopedic Equipments):ti,ab,kw OR (Equipment, Orthopedic):ti,ab,kw OR (Equipments, Orthopedic):ti,ab,kw) AND ((Osteoarthritis of Knee):ti,ab,kw OR (Knee Osteoarthritis):ti,ab,kw OR (Knee Osteoarthritis):ti,ab,kw OR (Osteoarthritis of the Knee):ti,ab,kw) OR MeSH descriptor: [Osteoarthritis, Knee] explode all trees)

#### **MEDLINE**

1. (knee osteoarthritis) OR (femorotibial arthrosis) OR (gonarthrosis) OR (knee arthrosis) OR (knee osteo-arthritis) OR (knee osteoarthritis) OR (osteoarthritis)
2. (physical therapy) OR (physiotherapy) OR (physio therapy) OR (physical treatment) OR (physiotherapy department) OR (physical therapy techniques)
3. (orthotic devices) OR (Orthopedic Equipment) OR (orthosis) OR (device) OR (orthosis) OR (orthoses) OR (orthopedic support device)
4. #2 OR #3

1  
2  
3 5. #1 AND #4  
4  
5  
6  
7

## Appendix 2 Results of re-analysis

8  
9  
10

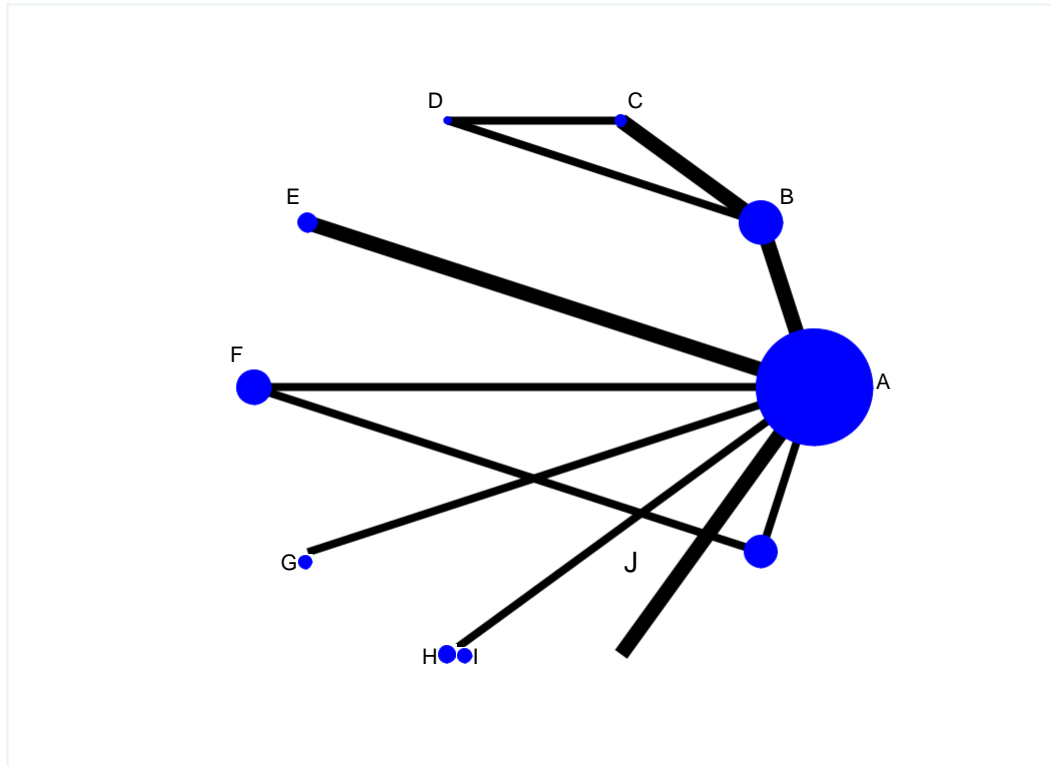

35 eFigure 1. Structure of network formed by interventions and their direct comparisons on First  
36 peak KAM (re-analysis). A= Control condition; B= Lateral Wedge Insole; C= Knee Brace;  
37 D= Lateral Wedge Insole+ Knee Brace; E= Gait retraining; F= Quadriceps strengthening; G=  
38 Variable-stiffness shoe; H= Hip strengthening; I= Lower limb exercise; J= Neuromuscular  
39 exercise.  
40  
41  
42  
43  
44  
45  
46  
47  
48  
49  
50  
51  
52  
53  
54  
55  
56  
57  
58  
59  
60

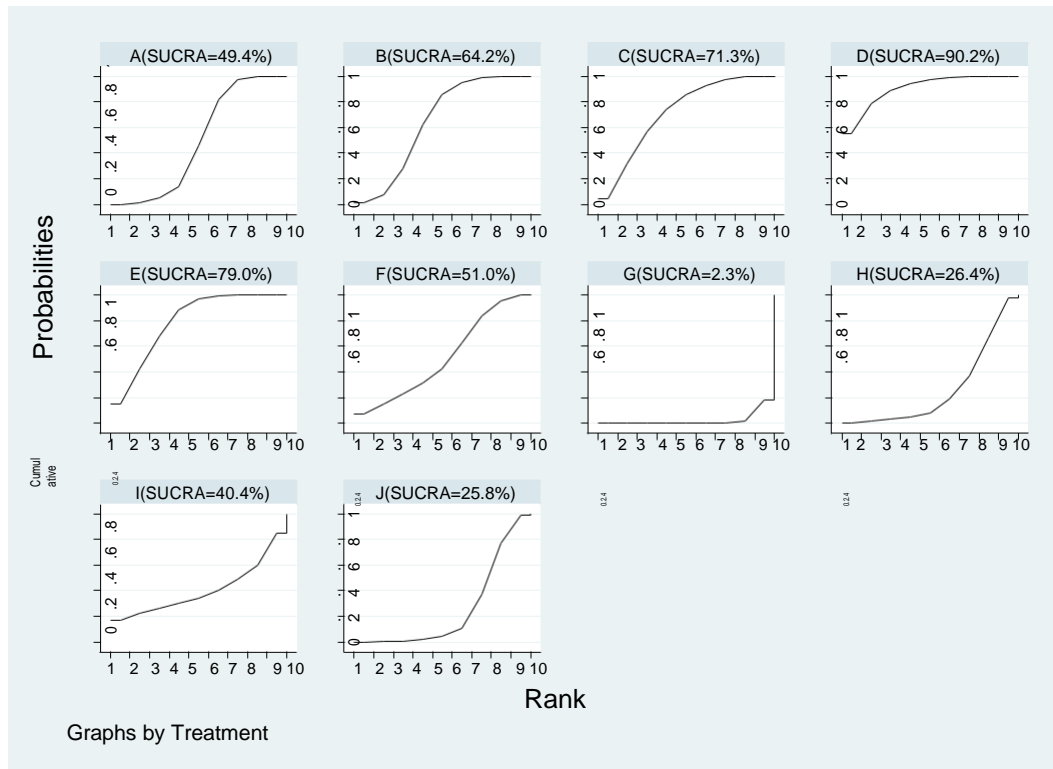

Figure 2. Rankings for effects on First peak KAM (re-analysis). Graph displays distribution of probabilities for each treatment. X-axis represents the possible rank of each treatment (from the best to worst according to the outcomes), Y-axis represents the cumulative probability for each treatment to be the best option, among the best two options, among the best three options, and so on. A= Control condition; B= Lateral Wedge Insole; C= Knee Brace; D= Lateral Wedge Insole+ Knee Brace; E= Gait retraining; F= Quadriceps strengthening; G= Variable-stiffness shoe; H= Hip strengthening; I= Lower limb exercise; J= Neuromuscular exercise.

### Appendix 3 Results of Inconsistency

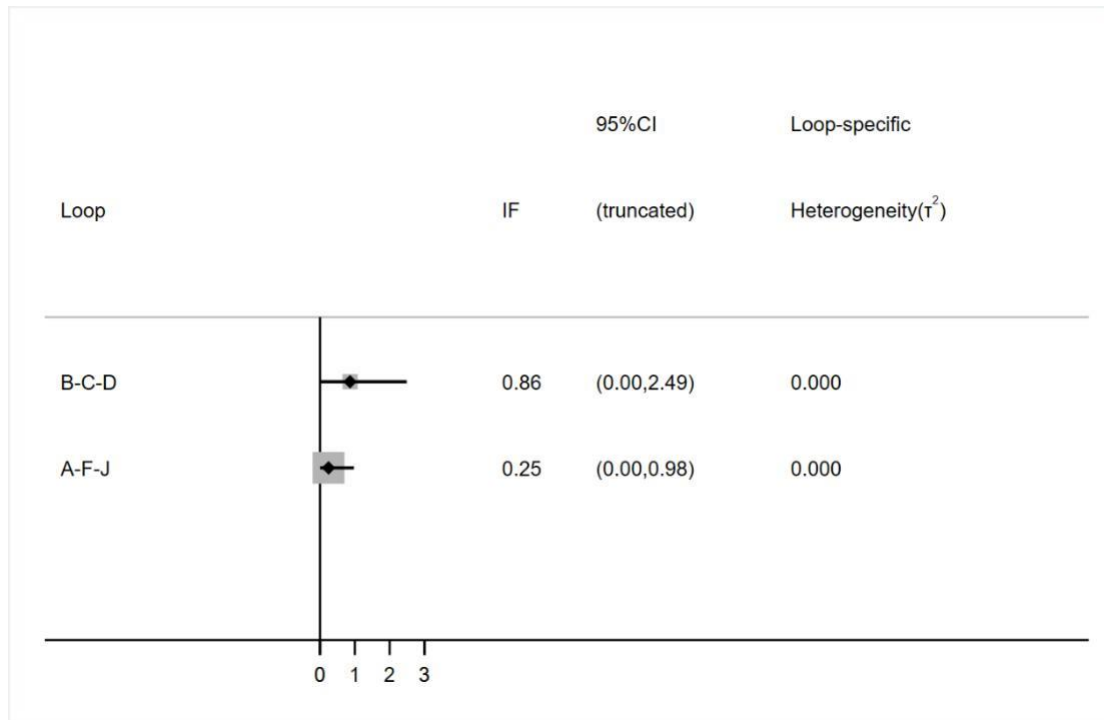

eFigure 1. Inconsistency for triangular loops in First peak KAM.

## Appendix 4 Conventional meta-analyses results

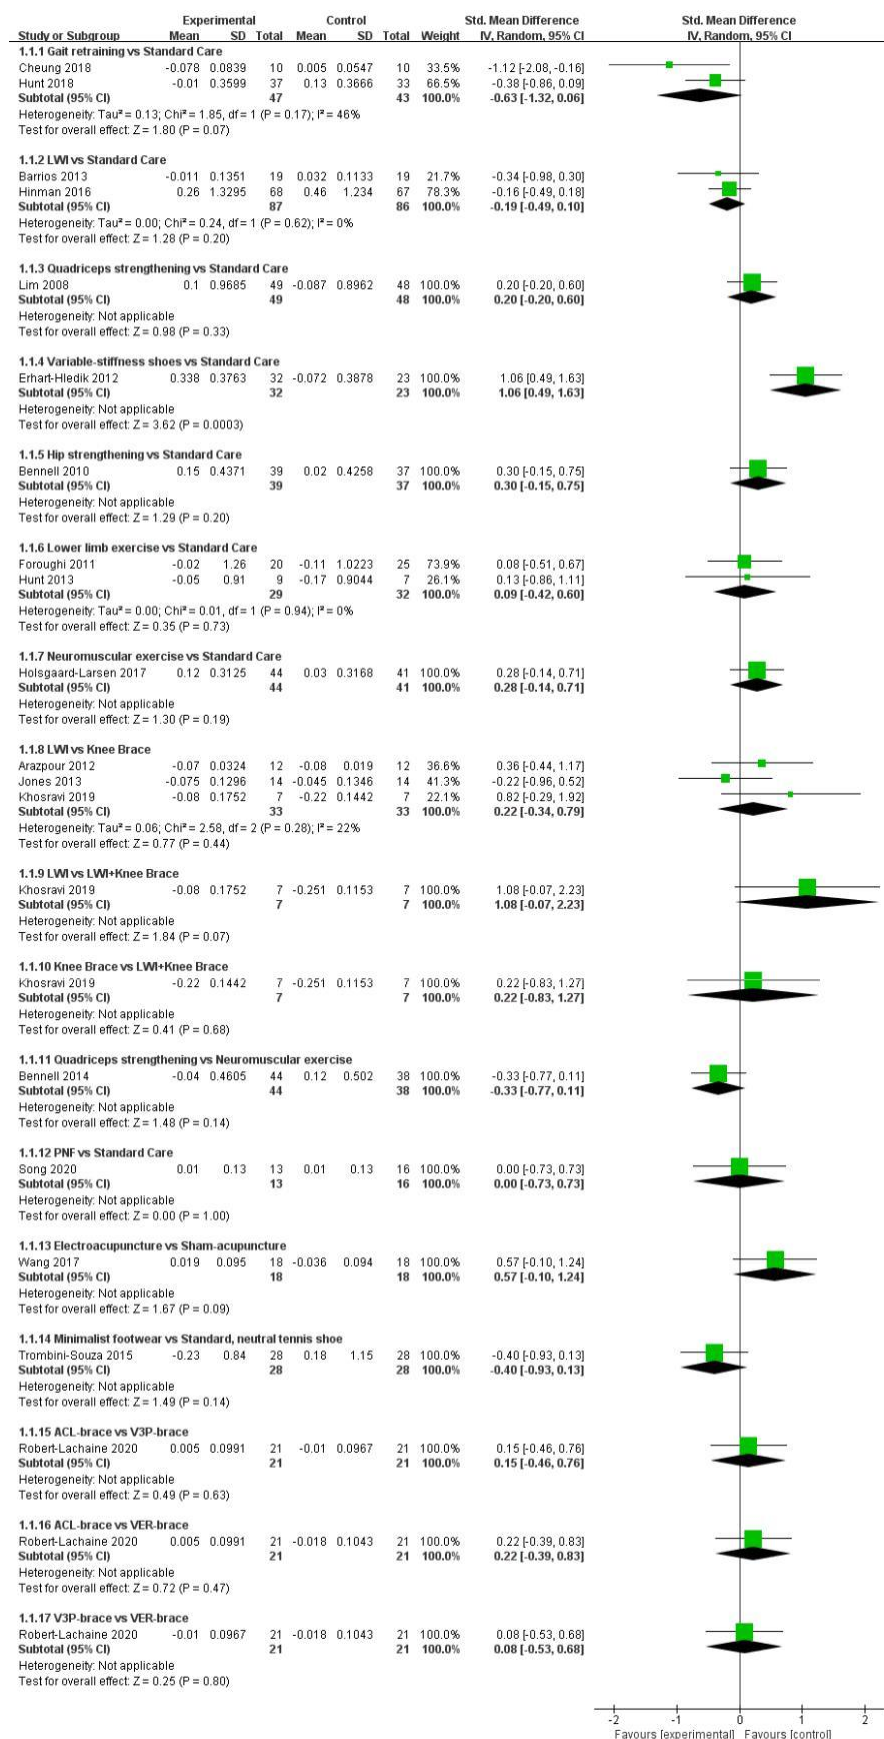

eFigure 1a. Conventional meta-analysis of treatment effects on First peak KAM.

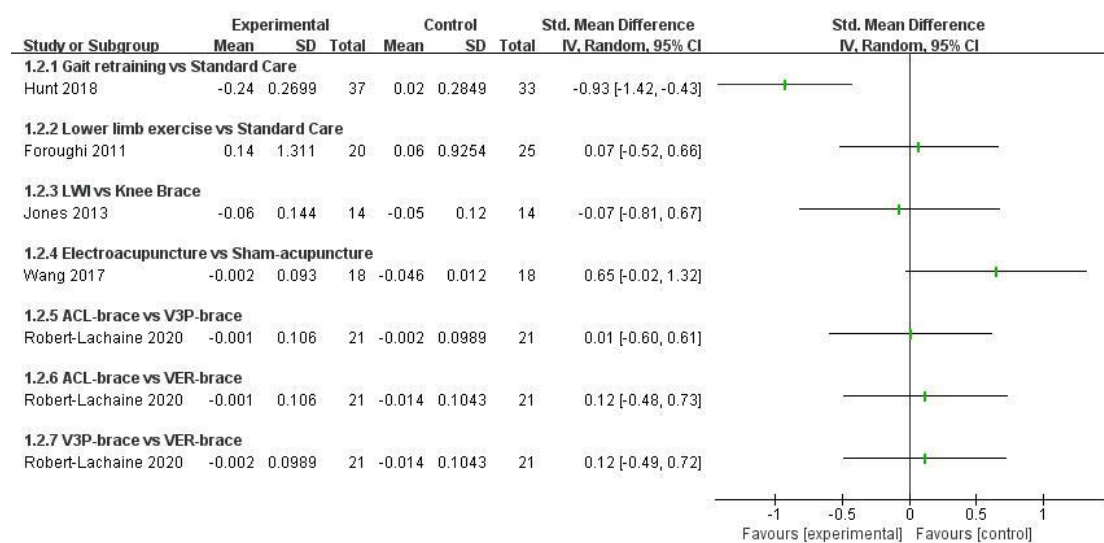

eFigure 1b. Conventional meta-analysis of treatment effects on Second peak KAM.

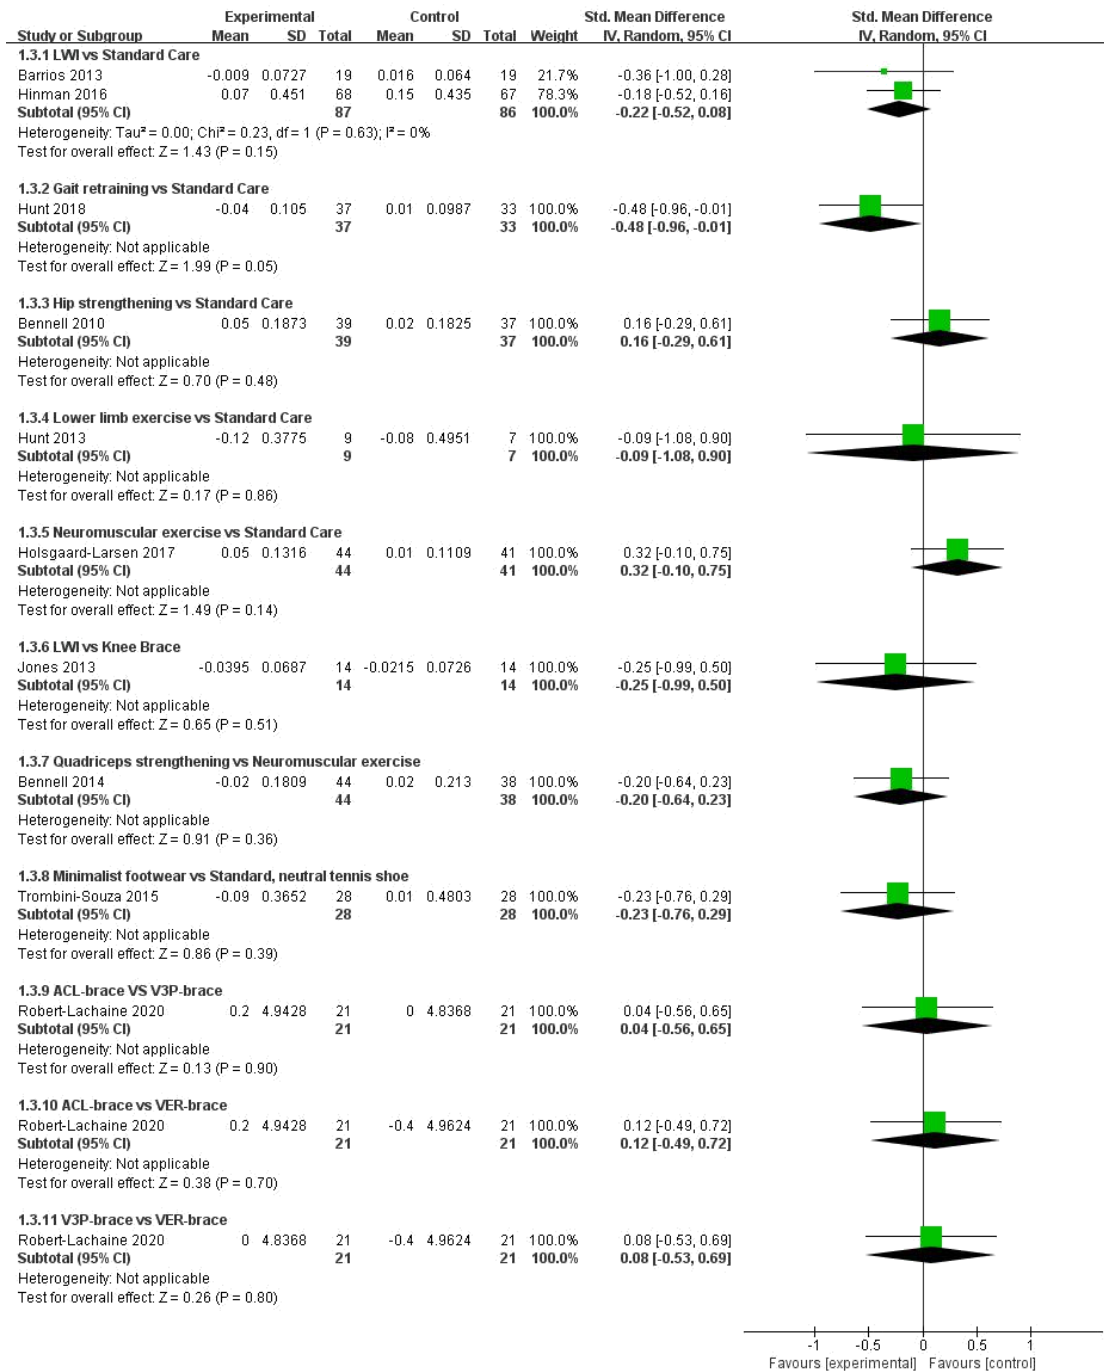

eFigure 1c. Conventional meta-analysis of treatment effects on KAAI.

## Appendix 5 Network Diagram

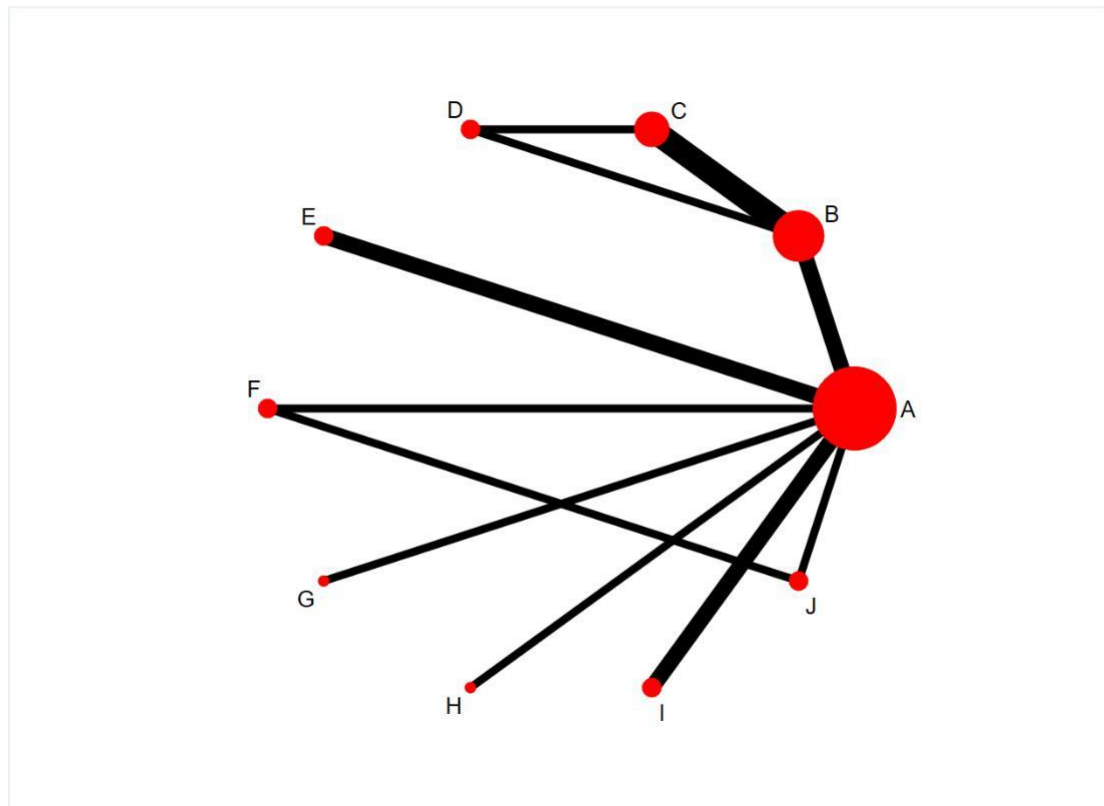

Figure 1a. Structure of network formed by interventions and their direct comparisons (First peak KAM). A= Control condition; B= Lateral Wedge Insole; C= Knee Brace; D= Lateral Wedge Insole+ Knee Brace; E= Gait retraining; F= Quadriceps strengthening; G= Variable-stiffness shoe; H= Hip strengthening; I= Lower limb exercise; J= Neuromuscular exercise.

**Footnote:** Width of the lines is proportional to the number of trials comparing every pair of treatments. Size of every circle is proportional to the number of randomly assigned participants (ie, sample size).



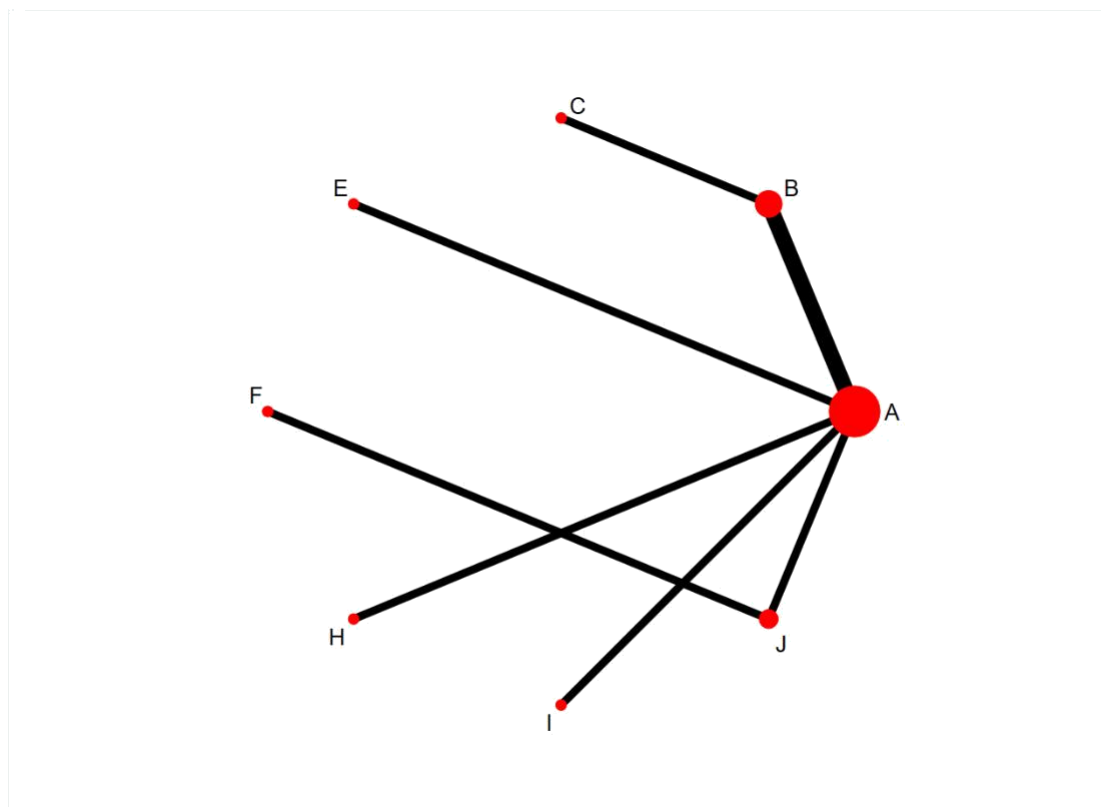

eFigure 1b. Structure of network formed by interventions and their direct comparisons (KAAI). A= Control condition; B= Lateral Wedge Insole; C= Knee Brace; E= Gait retraining; F= Quadriceps strengthening; H= Hip strengthening; I= Lower limb exercise; J= Neuromuscular exercise.

**Footnote:** Width of the lines is proportional to the number of trials comparing every pair of treatments. Size of every circle is proportional to the number of randomly assigned participants (ie, sample size).

## Appendix 6 Table of GRADE

Based on all the above information, we GRADEd each network estimate according to the following criteria:

- 1) Study limitations: We downgraded by one level when the contributions from low RoB comparisons were less than 30% and contributions from moderate RoB comparisons were 70% or greater. And we downgraded by two level when the contributions from low RoB comparisons were more than 30%.
- 2) Imprecision: We considered a clinically meaningful threshold for CI to be 0 and did not

downgrade the estimate if the upper limit is below 0; or if the lower limit is above 0.

- 3) Inconsistency: We rated two concepts, heterogeneity and incoherence (inconsistency), in this domain. For heterogeneity, we did not downgrade any network estimate for heterogeneity, because we looked at the common tau and found that it is low. For inconsistency, we looked at the results of inconsistency (Appendix 2), where we have not downgraded for imprecision.
- 4) Indirectness: We have assured transitivity in our network by limiting the included studies to patients with knee osteoarthritis. Evaluation of transitivity for singly-connected nodes is unclear, so we downgraded such nodes for indirectness.
- 5) Publication bias: The comparison-adjusted funnel plot (Appendix 5) did not suggest presence of overall publication bias. We managed to retrieve supplementary and unpublished information included in the available systematic reviews and network meta-analyses, and we are confident that we have all available information that is possible to capture from clinical trial registries. Although we cannot completely rule out the possibility that some research is still missing, we still believe that the project does not need to be downgraded.

| Comparison                                               | Nature of the Evidence | GRADE    | Downgrading due to                           |
|----------------------------------------------------------|------------------------|----------|----------------------------------------------|
| <b>AB:</b> Control Condition vs LWI                      | Mixed                  | LOW      | Study limitations; Imprecision               |
| <b>AC:</b> Control Condition vs Knee Brace               | Indirect               | LOW      | Study limitations; Imprecision               |
| <b>AD:</b> Control Condition vs LWI+Knee Brace           | Indirect               | LOW      | Study limitations; Imprecision               |
| <b>AE:</b> Control Condition vs Gait Retraining          | Mixed                  | VERY LOW | Study limitations; Indirectness              |
| <b>AF:</b> Control Condition vs Quadriceps Strengthening | Mixed                  | VERY LOW | Study limitations; Imprecision               |
| <b>AG:</b> Control Condition vs Variable-Stiffness Shoes | Mixed                  | VERY LOW | Study limitations; Indirectness;             |
| <b>AH:</b> Control Condition vs Hip Strengthening        | Mixed                  | VERY LOW | Study limitations; Indirectness; Imprecision |

|                                                        |          |          |                                              |
|--------------------------------------------------------|----------|----------|----------------------------------------------|
| <b>AI:</b> Control Condition vs Lower Limb Exercise    | Mixed    | VERY LOW | Study limitations; Indirectness; Imprecision |
| <b>AJ:</b> Control Condition vs Neuromuscular Exercise | Mixed    | MODERATE | Study limitations                            |
| <b>BC:</b> LWI vs Knee Brace                           | Mixed    | VERY LOW | Study limitations; Imprecision               |
| <b>BD:</b> LWI vs LWI+Knee Brace                       | Mixed    | VERY LOW | Study limitations; Imprecision               |
| <b>BE:</b> LWI vs Gait Retraining                      | Indirect | VERY LOW | Study limitations; Indirectness; Imprecision |
| <b>BF:</b> LWI vs Quadriceps Strengthening             | Indirect | LOW      | Study limitations; Imprecision               |
| <b>BG:</b> LWI vs Variable-Stiffness Shoes             | Indirect | LOW      | Study limitations; Indirectness              |
| <b>BH:</b> LWI vs Hip Strengthening                    | Indirect | VERY LOW | Study limitations; Indirectness; Imprecision |
| <b>BI:</b> LWI vs Lower Limb Exercise                  | Indirect | VERY LOW | Study limitations; Indirectness; Imprecision |
| <b>BJ:</b> LWI vs Neuromuscular Exercise               | Indirect | MODERATE | Study limitations                            |
| <b>CD:</b> Knee Brace vs LWI+Knee Brace                | Mixed    | VERY LOW | Study limitations; Imprecision               |
| <b>CE:</b> Knee Brace vs Gait Retraining               | Indirect | VERY LOW | Study limitations; Indirectness; Imprecision |
| <b>CF:</b> Knee Brace vs Quadriceps Strengthening      | Indirect | LOW      | Study limitations; Imprecision               |
| <b>CG:</b> Knee Brace vs Variable-Stiffness Shoes      | Indirect | LOW      | Study limitations; Indirectness              |
| <b>CH:</b> Knee Brace vs Hip Strengthening             | Indirect | VERY LOW | Study limitations; Indirectness; Imprecision |
| <b>CI:</b> Knee Brace vs Lower Limb Exercise           | Indirect | VERY LOW | Study limitations; Indirectness; Imprecision |
| <b>CJ:</b> Knee Brace vs Neuromuscular Exercise        | Indirect | MODERATE | Study limitations                            |
| <b>DE:</b> LWI+Knee Brace vs Gait                      | Indirect | VERY LOW | Study limitations; Indirectness;             |

|                                                                 |          |          |                                              |
|-----------------------------------------------------------------|----------|----------|----------------------------------------------|
| Retraining                                                      |          |          | Imprecision                                  |
| <b>DF:</b> LWI+Knee Brace vs Quadriceps                         | Indirect | LOW      | Study limitations; Imprecision               |
| Strengthening                                                   |          |          |                                              |
| <b>DG:</b> LWI+Knee Brace vs Variable-Stiffness Shoes           | Indirect | VERY LOW | Study limitations; Indirectness              |
| <b>DH:</b> LWI+Knee Brace vs Hip Strengthening                  | Indirect | LOW      | Study limitations; Indirectness              |
| <b>DI:</b> LWI+Knee Brace vs Lower Limb Exercise                | Indirect | VERY LOW | Study limitations; Indirectness; Imprecision |
| <b>DJ:</b> LWI+Knee Brace vs Neuromuscular Exercise             | Indirect | MODERATE | Study limitations                            |
| <b>EF:</b> Gait Retraining vs Quadriceps Strengthening          | Indirect | VERY LOW | Study limitations; Indirectness              |
| <b>EG:</b> Gait Retraining vs Variable-Stiffness Shoes          | Indirect | VERY LOW | Study limitations; Indirectness              |
| <b>EH:</b> Gait Retraining vs Hip Strengthening                 | Indirect | LOW      | Study limitations; Indirectness              |
| <b>EI:</b> Gait Retraining vs Lower limb Exercise               | Indirect | VERY LOW | Study limitations; Indirectness; Imprecision |
| <b>EJ:</b> Gait Retraining vs Neuromuscular Exercise            | Indirect | LOW      | Study limitations; Indirectness              |
| <b>FG:</b> Quadriceps Strengthening vs Variable-Stiffness Shoes | Indirect | VERY LOW | Study limitations; Indirectness              |
| <b>FH:</b> Quadriceps Strengthening vs Hip Strengthening        | Indirect | VERY LOW | Study limitations; Indirectness; Imprecision |
| <b>FI:</b> Quadriceps Strengthening vs Lower Limb Exercise      | Indirect | VERY LOW | Study limitations; Indirectness; Imprecision |
| <b>FJ:</b> Quadriceps Strengthening vs Neuromuscular Exercise   | Mixed    | LOW      | Study limitations; Imprecision               |

|    |                                              |          |          |                                  |
|----|----------------------------------------------|----------|----------|----------------------------------|
| 1  |                                              |          |          |                                  |
| 2  |                                              |          |          |                                  |
| 3  |                                              |          |          |                                  |
| 4  | <b>GH:</b> Variable-Stiffness Shoes vs Hip   | Indirect | LOW      | Study limitations; Indirectness  |
| 5  | Strengthening                                |          |          |                                  |
| 6  |                                              |          |          |                                  |
| 7  | <b>GI:</b> Variable-Stiffness Shoes vs Lower | Indirect | VERY LOW | Study limitations; Indirectness  |
| 8  | Limb Exercise                                |          |          |                                  |
| 9  |                                              |          |          |                                  |
| 10 |                                              |          |          |                                  |
| 11 | <b>GJ:</b> Variable-Stiffness Shoes vs       | Indirect | LOW      | Study limitations; Indirectness  |
| 12 | Neuromuscular Exercise                       |          |          |                                  |
| 13 |                                              |          |          |                                  |
| 14 |                                              |          |          |                                  |
| 15 | <b>HI:</b> Hip Strengthening vs Lower Limb   | Indirect | VERY LOW | Study limitations; Indirectness; |
| 16 | Exercise                                     |          |          | Imprecision                      |
| 17 |                                              |          |          |                                  |
| 18 |                                              |          |          |                                  |
| 19 | <b>HJ:</b> Hip Strengthening vs              | Indirect | VERY LOW | Study limitations; Indirectness; |
| 20 | Neuromuscular Exercise                       |          |          | Imprecision                      |
| 21 |                                              |          |          |                                  |
| 22 |                                              |          |          |                                  |
| 23 | <b>IJ:</b> Lower Limb Exercise vs            | Indirect | VERY LOW | Study limitations; Indirectness; |
| 24 | Neuromuscular Exercise                       |          |          | Imprecision                      |
| 25 |                                              |          |          |                                  |
| 26 |                                              |          |          |                                  |
| 27 |                                              |          |          |                                  |
| 28 |                                              |          |          |                                  |
| 29 |                                              |          |          |                                  |
| 30 |                                              |          |          |                                  |
| 31 |                                              |          |          |                                  |
| 32 |                                              |          |          |                                  |
| 33 |                                              |          |          |                                  |
| 34 |                                              |          |          |                                  |
| 35 |                                              |          |          |                                  |
| 36 |                                              |          |          |                                  |
| 37 |                                              |          |          |                                  |
| 38 |                                              |          |          |                                  |
| 39 |                                              |          |          |                                  |
| 40 |                                              |          |          |                                  |
| 41 |                                              |          |          |                                  |
| 42 |                                              |          |          |                                  |
| 43 |                                              |          |          |                                  |
| 44 |                                              |          |          |                                  |
| 45 |                                              |          |          |                                  |
| 46 |                                              |          |          |                                  |
| 47 |                                              |          |          |                                  |
| 48 |                                              |          |          |                                  |
| 49 |                                              |          |          |                                  |
| 50 |                                              |          |          |                                  |
| 51 |                                              |          |          |                                  |
| 52 |                                              |          |          |                                  |
| 53 |                                              |          |          |                                  |
| 54 |                                              |          |          |                                  |
| 55 |                                              |          |          |                                  |
| 56 |                                              |          |          |                                  |
| 57 |                                              |          |          |                                  |
| 58 |                                              |          |          |                                  |
| 59 |                                              |          |          |                                  |
| 60 |                                              |          |          |                                  |

## Appendix 7 Comparison-adjusted funnel plot for each outcome from the network meta-analysis

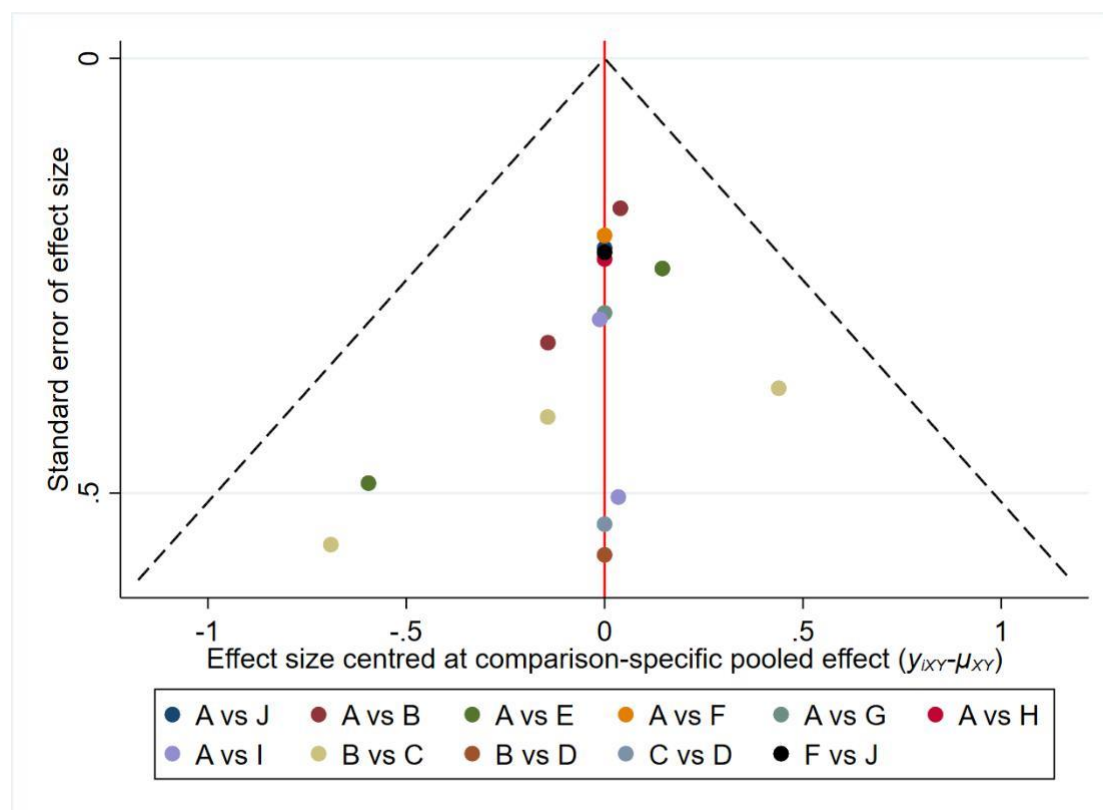

eFigure 1a. Comparison-adjusted funnel plot for First peak KAM.

A= Control condition; B= Lateral Wedge Insole; C= Knee Brace; D= Lateral Wedge Insole+ Knee Brace; E= Gait retraining; F= Quadriceps strengthening; G= Variable-stiffness shoe; H= Hip strengthening; I= Lower limb exercise; J= Neuromuscular exercise.

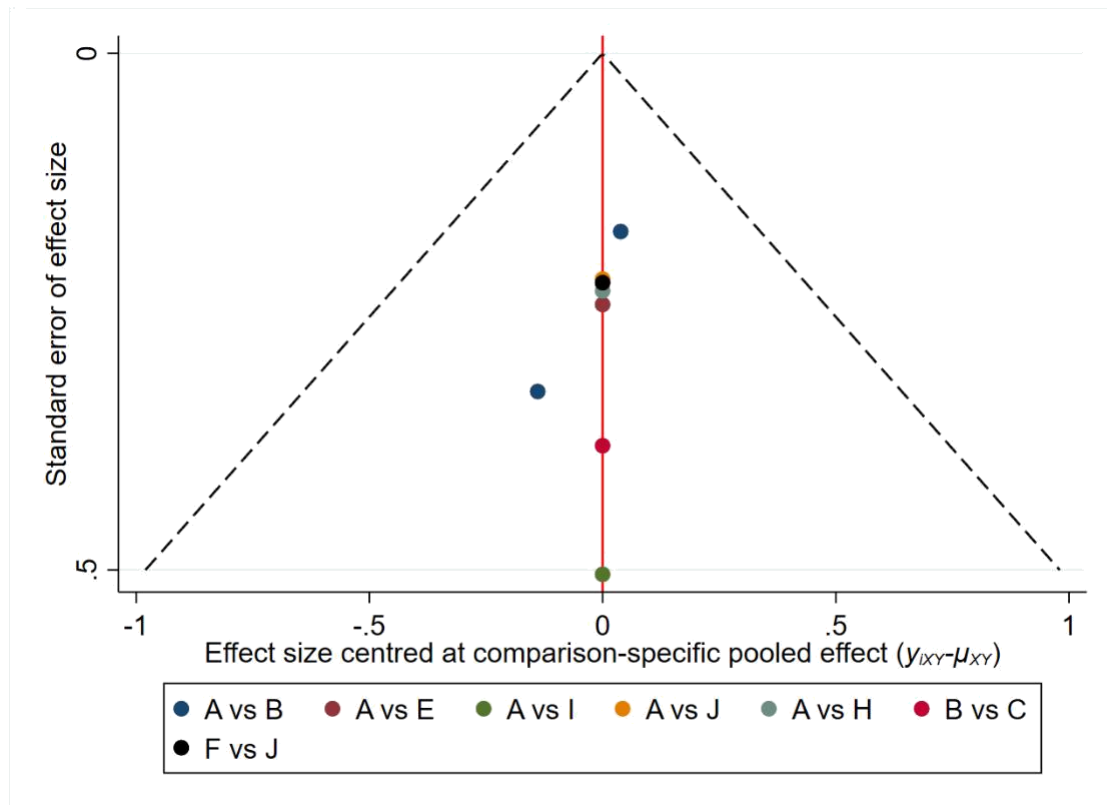

eFigure 1b. Comparison-adjusted funnel plot for KAAI.

A= Control condition; B= Lateral Wedge Insole; C= Knee Brace; E= Gait retraining; F= Quadriceps strengthening; H= Hip strengthening; I= Lower limb exercise; J= Neuromuscular exercise.

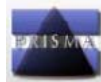

# PRISMA 2009 Checklist

| Section/Topic                      | #  | Checklist Item                                                                                                                                                                                                                                                                                              | Reported on Page #              |
|------------------------------------|----|-------------------------------------------------------------------------------------------------------------------------------------------------------------------------------------------------------------------------------------------------------------------------------------------------------------|---------------------------------|
| <b>TITLE</b>                       |    |                                                                                                                                                                                                                                                                                                             |                                 |
| Title                              | 1  | Identify the report as a systematic review, meta-analysis, or both.                                                                                                                                                                                                                                         | Page 1                          |
| <b>ABSTRACT</b>                    |    |                                                                                                                                                                                                                                                                                                             |                                 |
| Structured summary                 | 2  | Provide a structured summary including, as applicable: background; objectives; data sources; study eligibility criteria, participants, and interventions; study appraisal and synthesis methods; results; limitations; conclusions and implications of key findings; systematic review registration number. | Page 3, Line 67-93              |
| <b>INTRODUCTION</b>                |    |                                                                                                                                                                                                                                                                                                             |                                 |
| Rationale                          | 3  | Describe the rationale for the review in the context of what is already known.                                                                                                                                                                                                                              | Page 4-5, Line 107-169          |
| Objectives                         | 4  | Provide an explicit statement of questions being addressed with reference to participants, interventions, comparisons, outcomes, and study design (PICOS).                                                                                                                                                  | Page 7, Line 167-169            |
| <b>METHODS</b>                     |    |                                                                                                                                                                                                                                                                                                             |                                 |
| Protocol and registration          | 5  | Indicate if a review protocol exists, if and where it can be accessed (e.g., Web address), and, if available, provide registration information including registration number.                                                                                                                               | None                            |
| Eligibility criteria               | 6  | Specify study characteristics (e.g., PICOS, length of follow-up) and report characteristics (e.g., years considered, language, publication status) used as criteria for eligibility, giving rationale.                                                                                                      | Page 8, Line 179-186            |
| Information sources                | 7  | Describe all information sources (e.g., databases with dates of coverage, contact with study authors to identify additional studies) in the search and date last searched.                                                                                                                                  | Page 8, Line 179-186            |
| Search                             | 8  | Present full electronic search strategy for at least one database, including any limits used, such that it could be repeated.                                                                                                                                                                               | Appendix 1 Search strategies    |
| Study selection                    | 9  | State the process for selecting studies (i.e., screening, eligibility, included in systematic review, and, if applicable, included in the meta-analysis).                                                                                                                                                   | Page 8, Line 179-186 & Figure 1 |
| Data collection process            | 10 | Describe method of data extraction from reports (e.g., piloted forms, independently, in duplicate) and any processes for obtaining and confirming data from investigators.                                                                                                                                  | Page 9, Line 206-215            |
| Data items                         | 11 | List and define all variables for which data were sought (e.g., PICOS, funding sources) and any assumptions and simplifications made.                                                                                                                                                                       | Page 8, Line 192-196            |
| Risk of bias in individual studies | 12 | Describe methods used for assessing risk of bias of individual studies (including specification of whether this was done at the study or outcome level) and how this information is to be used in any data synthesis.                                                                                       | Page 9-10, Line 217-242         |





# PRISMA 2009 Checklist

1  
2  
3  
4  
5  
6  
7  
8  
9  
10  
11  
12  
13  
14  
15  
16  
17  
18  
19  
20  
21  
22  
23  
24  
25  
26  
27  
28  
29  
30  
31  
32  
33  
34  
35  
36  
37  
38  
39  
40  
41  
42  
43  
44  
45  
46  
47

|                      |    |                                                                                                                                                           |                             |
|----------------------|----|-----------------------------------------------------------------------------------------------------------------------------------------------------------|-----------------------------|
|                      |    |                                                                                                                                                           | & Figure 4                  |
| Summary measures     | 13 | State the principal summary measures (e.g., risk ratio, difference in means).                                                                             | Page 11-12,<br>Line 244-272 |
| Synthesis of results | 14 | Describe the methods of handling data and combining results of studies, if done, including measures of consistency (e.g., $I^2$ ) for each meta-analysis. | Page 11-12,<br>Line 244-272 |

Page 1 of 2

| Section/Topic               | #  | Checklist Item                                                                                                                                   | Reported on Page #         |
|-----------------------------|----|--------------------------------------------------------------------------------------------------------------------------------------------------|----------------------------|
| Risk of bias across studies | 15 | Specify any assessment of risk of bias that may affect the cumulative evidence (e.g., publication bias, selective reporting within studies).     | Page 9-10,<br>Line 217-228 |
| Additional analyses         | 16 | Describe methods of additional analyses (e.g., sensitivity or subgroup analyses, meta-regression), if done, indicating which were pre-specified. | Page 12,<br>Line 267-272   |

## RESULTS

|                             |    |                                                                                                                                                                 |                                             |
|-----------------------------|----|-----------------------------------------------------------------------------------------------------------------------------------------------------------------|---------------------------------------------|
| Study selection             | 17 | Give numbers of studies screened, assessed for eligibility, and included in the review, with reasons for exclusions at each stage, ideally with a flow diagram. | Page 12-13,<br>Line 285-294<br>& Figure 1   |
| Study characteristics       | 18 | For each study, present characteristics for which data were extracted (e.g., study size, PICOS, follow-up period) and provide the citations.                    | Page 13-14,<br>Line 296-309<br>& Table 1, 2 |
| Risk of bias within studies | 19 | Present data on risk of bias of each study and, if available, any outcome level assessment (see item 12).                                                       | Page 16,<br>Line 353-362<br>& Figure        |

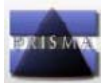

# PRISMA 2009 Checklist

1  
2  
3  
4  
5  
6  
7  
8  
9  
10  
11  
12  
13  
14  
15  
16  
17  
18  
19  
20  
21  
22  
23  
24  
25  
26  
27  
28  
29  
30  
31  
32  
33  
34  
35  
36  
37  
38  
39  
40  
41  
42  
43  
44  
45  
46  
47

|                               |    |                                                                                                                                                                                                          |                                                  |
|-------------------------------|----|----------------------------------------------------------------------------------------------------------------------------------------------------------------------------------------------------------|--------------------------------------------------|
|                               |    |                                                                                                                                                                                                          | 4                                                |
| Results of individual studies | 20 | For all outcomes considered (benefits or harms), present, for each study: (a) simple summary data for each intervention group (b) effect estimates and confidence intervals, ideally with a forest plot. | Page 14-15, Line 310-339 & Appendix 4            |
| Synthesis of results          | 21 | Present the main results of the review. If meta-analyses done, include for each, confidence intervals and measures of consistency.                                                                       | Page 14-15, Line 310-339 & Table 3 & Figure 2, 3 |
| Risk of bias across studies   | 22 | Present results of any assessment of risk of bias across studies (see Item 15).                                                                                                                          | Page 16, Line 353-362 & Appendix 6               |
| Additional analysis           | 23 | Give results of additional analyses, if done (e.g., sensitivity or subgroup analyses, meta-regression [see Item 16]).                                                                                    | Page 15, Line 340-351 & Appendix 2 & 3 & 7       |
| <b>DISCUSSION</b>             |    |                                                                                                                                                                                                          |                                                  |
| Summary of evidence           | 24 | Summarize the main findings including the strength of evidence for each main outcome; consider their relevance to key groups (e.g., healthcare providers, users, and policy makers).                     | Page 16-17, Line 364-376                         |
| Limitations                   | 25 | Discuss limitations at study and outcome level (e.g., risk of bias), and at review-level (e.g., incomplete retrieval of identified research, reporting bias).                                            | Page 17-18,                                      |

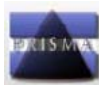

# PRISMA 2009 Checklist

1  
2  
3  
4  
5  
6  
7  
8  
9  
10  
11  
12  
13  
14  
15  
16  
17  
18  
19  
20  
21  
22  
23  
24  
25  
26  
27  
28  
29  
30  
31  
32  
33  
34  
35  
36  
37  
38  
39  
40  
41  
42  
43  
44  
45  
46  
47

|                |    |                                                                                                                                            |                                   |
|----------------|----|--------------------------------------------------------------------------------------------------------------------------------------------|-----------------------------------|
|                |    |                                                                                                                                            | Line<br>392-410                   |
| Conclusions    | 26 | Provide a general interpretation of the results in the context of other evidence, and implications for future research.                    | Page<br>19-22,<br>Line<br>431-489 |
| <b>FUNDING</b> |    |                                                                                                                                            |                                   |
| Funding        | 27 | Describe sources of funding for the systematic review and other support (e.g., supply of data); role of funders for the systematic review. | Page 22,<br>Line<br>499-502       |

From: Moher D, Liberati A, Tetzlaff J, Altman DG, The PRISMA Group (2009). Preferred Reporting Items for Systematic Reviews and Meta-Analyses: The PRISMA Statement. PLoS Med 6(6): e1000097. doi:10.1371/journal.pmed1000097

For more information, visit: [www.prisma-statement.org](http://www.prisma-statement.org).
